# Supplementary material for: Cross-Regional View of Functional and Taxonomic Microbiota Composition in Obesity and Post-obesity Treatment Shows Country Specific Microbial Contribution
Source: PubMed Central journal article supplement (PMC6812679; doi:10.3389/fmicb.2019.02346), 2019-10-17
Supplement: Image_2.pdf [file Image_2.pdf]

CCA p-value: 0.001 – ADONIS p-value: 0.0017

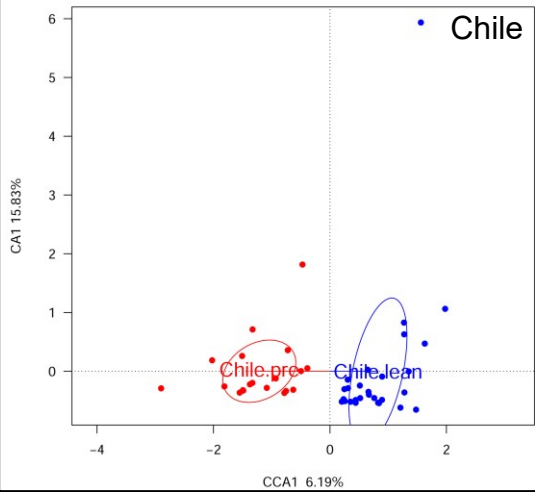

CCA p-value: 0.001 – ADONIS p-value: 0.0017

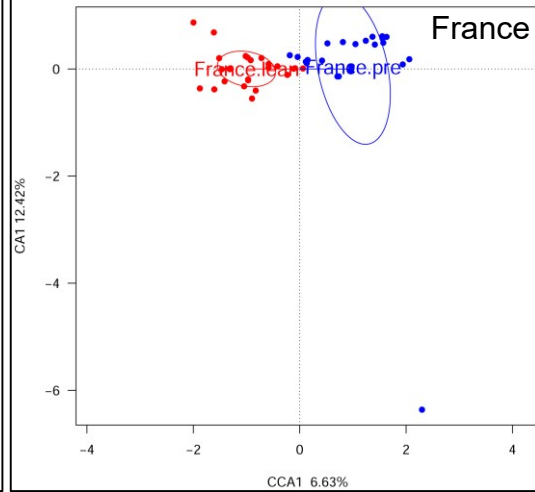

CCA p-value: 0.047 – ADONIS p-value: 0.11

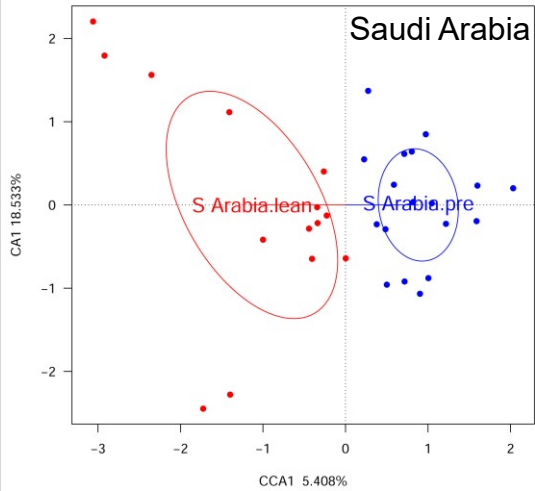

CCA p-value: 0.44 – ADONIS p-value: 0.15

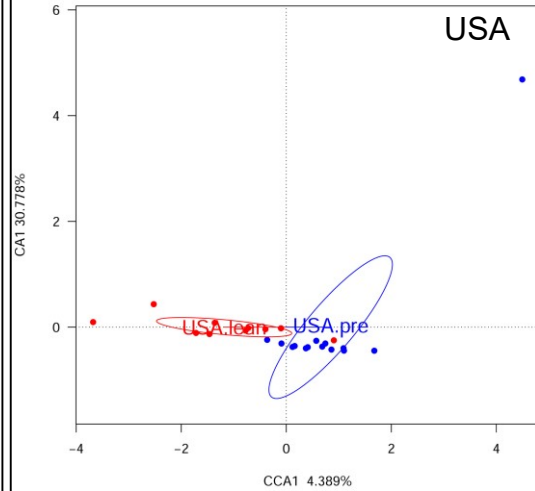

**Supplementary Figure 2. Variance comparison between taxonomic abundances in lean and obese subjects.** Constrained Correspondence Analysis (CCA) and Adonis test to contrast obese (red) and lean (blue) subject taxonomic abundance by country. p-values obtained from CCA and Adonis tests are denoted.
