# Supplementary material for: Cross-Regional View of Functional and Taxonomic Microbiota Composition in Obesity and Post-obesity Treatment Shows Country Specific Microbial Contribution
Source: PubMed Central journal article supplement (PMC6812679; doi:10.3389/fmicb.2019.02346), 2019-10-17
Supplement: Image_4.pdf [file Image_4.pdf]

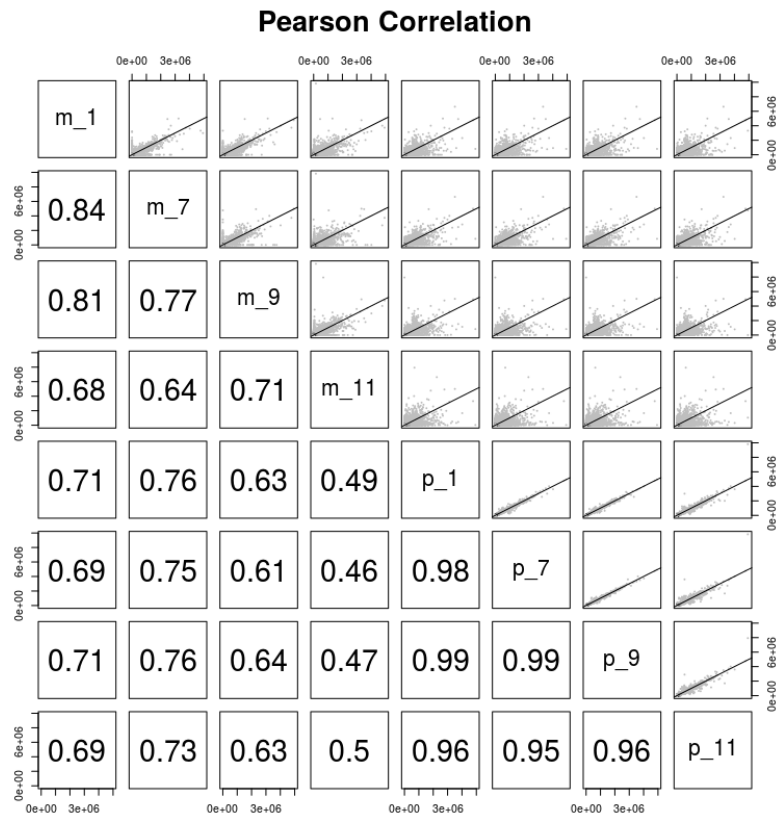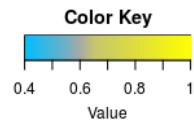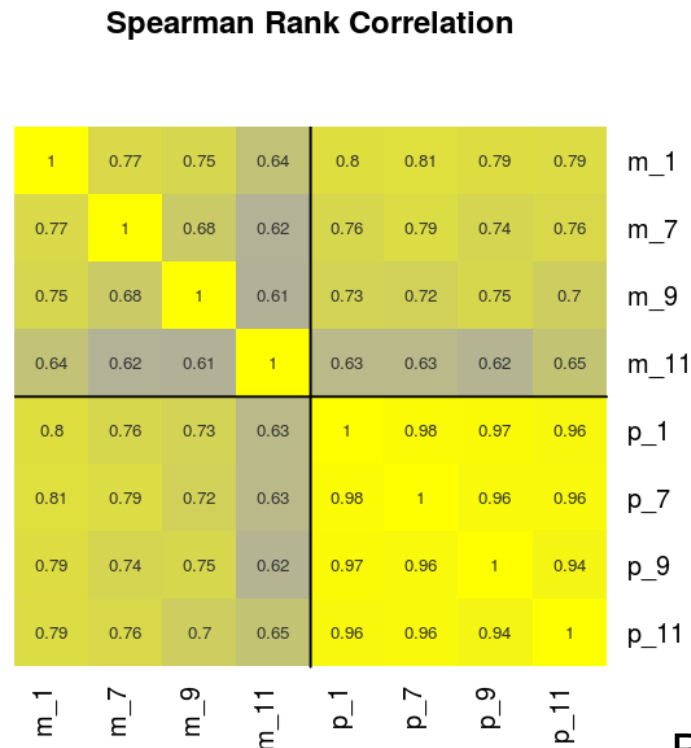

A

B

**Supplementary Figure 4. Functional Prediction Validation.** Pearson correlation (A) and pairwise Spearman Rank correlation (B) between KEGG Orthology metagenomic data (denoted by m\_) and functional KEGG Orthology prediction by PICRUSt (denoted by p\_). Numbers 1, 7, 9 and 11 represent subject codes.
