# Supplementary material for: Cross-Regional View of Functional and Taxonomic Microbiota Composition in Obesity and Post-obesity Treatment Shows Country Specific Microbial Contribution
Source: Front Microbiol. 2019 Oct 17;10:2346. doi: 10.3389/fmicb.2019.02346 (PMC6812679; doi:10.3389/fmicb.2019.02346)
Supplement: Supplementary file 1 [file Table_1.xlsx]

## Sheet: SupplementaryTable S1
Table S1: Studies, description and accession numbers of raw data used in this work.
Study	Country	DOI	Seq platform	Target Region	Data Base	Accession number	N° lean subjects (BMI < 25)	N° obese subjects	Age (obese subjects)	BMI (kg/m2)
Medina, 2017	Chile	10.7717/peerj.3443	Illumina MiSeq	16s rRNA V3-V4	SRA (NCBI)	SRP076859	0	19	18-60	37.4±4.5
Thomson, 2019	Chile	10.1017/S0007114519001570	Illumina MiSeq	16s rRNA V3-V4	ENA (EMBL)	PRJEB27704	28	0	18 - 50 (normal subjects)	20 - 30
Yasir, 2015	France – Saudi Arabia	10.1038/nutd.2015.3	Illumina MiSeq	16s rRNA V3-V4	ENA (EMBL)	PRJEB10590	12 (France) / 9 (Saudi A)	16 (France) / 9 (Saudi A)	39±13 (Fr)/ 26±3 (SAr)	38.3±7.9 (F) / 46.0±5.9 (SAr)
Ilhan, 2017	USA	10.1038/ismej.2017.71	Illumina MiSeq	16s rRNA V4-V5	ENA (EMBL)	PRJNA321731	10	15	50±9	43.48
Medina, This study	Chile	This study	Illumina HiSeq	All DNA	ENA (EMBL)	PRJEB29060	0	6	18-60	37.4±4.5
Palleja, 2016	Denmark	10.1186/s13073-016-0312-1	Illumina HiSeq	All DNA	ENA (EMBL)	PRJEB12947	0	13	>20	35-45
Tremaroli, 2015	Italy	10.1016/j.cmet.2015.07.009	Illumina HiSeq	All DNA	ENA (EMBL)	ERP009310	0	7	35±10.12	45±4.7
