# Supplementary material for: Cross-Regional View of Functional and Taxonomic Microbiota Composition in Obesity and Post-obesity Treatment Shows Country Specific Microbial Contribution
Source: Front Microbiol. 2019 Oct 17;10:2346. doi: 10.3389/fmicb.2019.02346 (PMC6812679; doi:10.3389/fmicb.2019.02346)
Supplement: Supplementary file 3 [file Table_3.xlsx]

## Sheet: Supplementary Table S3
Table S3: Metadata for the raw data of metagenomic files used in this study.
sample	country	treatment	donor	type	Study	Rawdata accesion number
MT.1.0	Chile	pre	MT.1	Obese	This study	ERR2824906
MT.1.6	Chile	post	MT.1	MT	This study	ERR2824907
MT.10.0	Chile	pre	MT.10	Obese	This study	ERR2824908
MT.10.6	Chile	post	MT.10	MT	This study	ERR2824909
GB.1.0	Chile	pre	GB.1	Obese	This study	ERR2824910
GB.1.6	Chile	post	GB.1	GB	This study	ERR2824911
GB.4.0	Chile	pre	GB.4	Obese	This study	ERR2824912
GB.4.6	Chile	post	GB.4	GB	This study	ERR2824913
SG.1.0	Chile	pre	SG.1	Obese	This study	ERR2824914
SG.1.6	Chile	post	SG.1	SG	This study	ERR2824915
SG.2.0	Chile	pre	SG.2	Obese	This study	ERR2824916
SG.2.6	Chile	post	SG.2	SG	This study	ERR2824917
GB1	Italy	post	GB1	GB	Tremaroli, 2015	ERR732910
GB2	Italy	post	GB2	GB	Tremaroli, 2015	ERR732911
GB3	Italy	post	GB3	GB	Tremaroli, 2015	ERR732912
GB4	Italy	post	GB4	GB	Tremaroli, 2015	ERR732913
GB5	Italy	post	GB5	GB	Tremaroli, 2015	ERR732914
GB6	Italy	post	GB6	GB	Tremaroli, 2015	ERR732915
GB7	Italy	post	GB7	GB	Tremaroli, 2015	ERR732916
Obese1	Italy	pre	Obese1	Obese	Tremaroli, 2015	ERR732924
Obese2	Italy	pre	Obese2	Obese	Tremaroli, 2015	ERR732925
Obese3	Italy	pre	Obese3	Obese	Tremaroli, 2015	ERR732926
Obese4	Italy	pre	Obese4	Obese	Tremaroli, 2015	ERR732927
Obese5	Italy	pre	Obese5	Obese	Tremaroli, 2015	ERR732928
Obese6	Italy	pre	Obese6	Obese	Tremaroli, 2015	ERR732929
Obese7	Italy	pre	Obese7	Obese	Tremaroli, 2015	ERR732930
GB1.12	Denmark	post	GB1	GB	Palleja, 2016	ERR1305877
GB1.0	Denmark	pre	GB1	Obese	Palleja, 2016	ERR1305879
GB2.12	Denmark	post	GB2	GB	Palleja, 2016	ERR1305880
GB2.0	Denmark	pre	GB2	Obese	Palleja, 2016	ERR1305882
GB3.12	Denmark	post	GB3	GB	Palleja, 2016	ERR1305887
GB3.0	Denmark	pre	GB3	Obese	Palleja, 2016	ERR1305889
GB4.12	Denmark	post	GB4	GB	Palleja, 2016	ERR1305894
GB4.0	Denmark	pre	GB4	Obese	Palleja, 2016	ERR1305896
GB5.12	Denmark	post	GB5	GB	Palleja, 2016	ERR1305899
GB5.0	Denmark	pre	GB5	Obese	Palleja, 2016	ERR1305901
GB6.12	Denmark	post	GB6	GB	Palleja, 2016	ERR1305902
GB6.0	Denmark	pre	GB6	Obese	Palleja, 2016	ERR1305904
GB7.12	Denmark	post	GB7	GB	Palleja, 2016	ERR1305907
GB7.0	Denmark	pre	GB7	Obese	Palleja, 2016	ERR1305909

## Sheet: Metadata PRJEB29060-this study
Table S3b: Metadata for the raw data of metagenomic files generated in this study.
Sample_ID	sample_alias	Sample_Treatment	Time (months)	forward_file_name	reverse_file_name	Submitted files Forward (FTP)	Submitted files Reverse (FTP)
1	MT.1.0	Medical (dietary)	0	1_R1.gz	1_R2.gz	ftp://ftp.sra.ebi.ac.uk/vol1/run/ERR282/ERR2824906/1_R1.gz	ftp://ftp.sra.ebi.ac.uk/vol1/run/ERR282/ERR2824906/1_R2.gz
2	MT.1.6	Medical (dietary)	6	2_R1.gz	2_R2.gz	ftp://ftp.sra.ebi.ac.uk/vol1/run/ERR282/ERR2824907/2_R1.gz	ftp://ftp.sra.ebi.ac.uk/vol1/run/ERR282/ERR2824907/2_R2.gz
3	MT.10.0	Medical (dietary)	0	3_R1.gz	3_R2.gz	ftp://ftp.sra.ebi.ac.uk/vol1/run/ERR282/ERR2824908/3_R1.gz	ftp://ftp.sra.ebi.ac.uk/vol1/run/ERR282/ERR2824908/3_R2.gz
4	MT.10.6	Medical (dietary)	6	4_R1.gz	4_R2.gz	ftp://ftp.sra.ebi.ac.uk/vol1/run/ERR282/ERR2824909/4_R1.gz	ftp://ftp.sra.ebi.ac.uk/vol1/run/ERR282/ERR2824909/4_R2.gz
5	GB.1.0	Gastric Bypass	0	5_R1.gz	5_R2.gz	ftp://ftp.sra.ebi.ac.uk/vol1/run/ERR282/ERR2824910/5_R1.gz	ftp://ftp.sra.ebi.ac.uk/vol1/run/ERR282/ERR2824910/5_R2.gz
6	GB.1.6	Gastric Bypass	6	6_R1.gz	6_R2.gz	ftp://ftp.sra.ebi.ac.uk/vol1/run/ERR282/ERR2824911/6_R1.gz	ftp://ftp.sra.ebi.ac.uk/vol1/run/ERR282/ERR2824911/6_R1.gz
7	GB.4.0	Gastric Bypass	0	7_R1.gz	7_R2.gz	ftp://ftp.sra.ebi.ac.uk/vol1/run/ERR282/ERR2824912/7_R1.gz	ftp://ftp.sra.ebi.ac.uk/vol1/run/ERR282/ERR2824912/7_R2.gz
8	GB.4.6	Gastric Bypass	6	8_R1.gz	8_R2.gz	ftp://ftp.sra.ebi.ac.uk/vol1/run/ERR282/ERR2824913/8_R1.gz	ftp://ftp.sra.ebi.ac.uk/vol1/run/ERR282/ERR2824913/8_R2.gz
9	SG.1.0	Sleeve Gastrectomy	0	9_R1.gz	9_R2.gz	ftp://ftp.sra.ebi.ac.uk/vol1/run/ERR282/ERR2824914/9_R1.gz	ftp://ftp.sra.ebi.ac.uk/vol1/run/ERR282/ERR2824914/9_R2.gz
10	SG.1.6	Sleeve Gastrectomy	6	10_R1.gz	10_R2.gz	ftp://ftp.sra.ebi.ac.uk/vol1/run/ERR282/ERR2824915/10_R1.gz	ftp://ftp.sra.ebi.ac.uk/vol1/run/ERR282/ERR2824915/10_R2.gz
11	SG.2.0	Sleeve Gastrectomy	0	11_R1.gz	11_R2.gz	ftp://ftp.sra.ebi.ac.uk/vol1/run/ERR282/ERR2824916/11_R1.gz	ftp://ftp.sra.ebi.ac.uk/vol1/run/ERR282/ERR2824916/11_R2.gz
12	SG.2.6	Sleeve Gastrectomy	6	12_R1.gz	12_R2.gz	ftp://ftp.sra.ebi.ac.uk/vol1/run/ERR282/ERR2824917/12_R1.gz	ftp://ftp.sra.ebi.ac.uk/vol1/run/ERR282/ERR2824917/12_R2.gz
	ENA Link	https://www.ebi.ac.uk/ena/data/view/PRJEB29060

## Sheet: Unstratified data (this study)
Table S3c: Metagenomic unstratified relative abundance resulting for the data generated in this study.
# Pathway	MT.1.0	MT.1.6	MT.10.0	MT.10.6	GB.1.0	GB.1.6	GB.4.0	GB.4.6	SG.1.0	SG.1.6	SG.2.0	SG.2.6
1CMET2-PWY: N10-formyl-tetrahydrofolate biosynthesis	0.000346279	0.000557658	0.000339628	0.000339966	0.000321438	0.000257922	0.000306511	0.000308755	0.00041022	0.00033302	0.000385787	0.000387429
3-HYDROXYPHENYLACETATE-DEGRADATION-PWY: 4-hydroxyphenylacetate degradation	0	9.04485E-07	1.96858E-06	0	0	0	0	1.22657E-06	0	0	2.00549E-07	6.74044E-07
7ALPHADEHYDROX-PWY: cholate degradation (bacteria, anaerobic)	0	0	0	0	0	0	0	0	0	0	0	6.22964E-07
AEROBACTINSYN-PWY: aerobactin biosynthesis	0	0	5.11066E-08	0	1.44642E-06	0	1.54756E-07	3.18239E-07	0	0	9.37537E-08	6.24006E-07
ALL-CHORISMATE-PWY: superpathway of chorismate metabolism	0	0	0	1.12183E-06	0	0	0	1.84193E-05	0	0	0	0
ALLANTOINDEG-PWY: superpathway of allantoin degradation in yeast	0	0	0	0	0	1.01713E-06	0	2.90935E-06	0	0	0	0
ANAEROFRUCAT-PWY: homolactic fermentation	0.000106054	0.000316465	0.00025507	8.47129E-05	3.74677E-05	0.000247528	0.00017059	0.000272012	0.000165926	0.000164188	0.000235689	0.000182011
ANAGLYCOLYSIS-PWY: glycolysis III (from glucose)	0.000444667	0.000547991	0.000490279	0.000437455	0.000322264	0.000344877	0.000407432	0.00034295	0.000421829	0.000369794	0.000301035	0.000331935
ARG+POLYAMINE-SYN: superpathway of arginine and polyamine biosynthesis	0.000189608	2.7207E-05	5.32778E-05	8.76743E-05	0.000135721	0.00013834	7.93114E-05	9.04714E-05	5.57405E-05	4.89798E-05	3.3931E-05	2.79983E-05
ARGDEG-PWY: superpathway of L-arginine, putrescine, and 4-aminobutanoate degradation	0	1.08616E-06	2.82675E-06	4.1498E-07	2.17458E-06	3.71074E-07	1.54947E-07	9.04233E-06	0	1.14685E-07	3.83579E-07	8.09093E-07
ARGININE-SYN4-PWY: L-ornithine de novo biosynthesis	8.05122E-05	0.000323115	0.000208224	4.43336E-05	3.63055E-07	0.000118498	0.000121293	0.00012707	0.000303681	0.000179622	0.0001832	0.000207857
ARGORNPROST-PWY: arginine, ornithine and proline interconversion	0	0	8.21543E-06	0	4.86421E-07	9.1998E-06	2.16962E-06	7.19103E-06	4.47988E-07	9.27318E-07	0	0
ARGSYN-PWY: L-arginine biosynthesis I (via L-ornithine)	0.000229788	0.000228615	0.000234672	0.00020883	0.00046495	0.000312392	0.000262611	0.000278644	0.000201767	0.00012422	8.91351E-05	0.000121657
ARGSYNBSUB-PWY: L-arginine biosynthesis II (acetyl cycle)	0.000113369	0.000106396	0.000124719	9.98758E-05	0.000285875	0.000215326	0.000135473	0.000160611	0.000108175	4.30092E-05	1.9435E-05	5.57586E-05
ARO-PWY: chorismate biosynthesis I	0.000618508	0.000567592	0.000489797	0.000652913	0.000736056	0.00042576	0.000668494	0.00047322	0.000470242	0.000388689	0.000461094	0.000451743
ASPASN-PWY: superpathway of L-aspartate and L-asparagine biosynthesis	0.000179901	0.00012032	0.000189006	0.000117785	0.000321416	0.000184777	0.000136613	0.000136141	0.000152152	0.000154946	0.000143491	0.000152692
AST-PWY: L-arginine degradation II (AST pathway)	0	4.61206E-07	1.50722E-06	3.68866E-07	2.78692E-07	1.16743E-05	1.29932E-07	5.30686E-06	0	0	1.53656E-07	4.41416E-07
BIOTIN-BIOSYNTHESIS-PWY: biotin biosynthesis I	1.47895E-05	5.8068E-06	2.45905E-05	4.26683E-06	2.25218E-06	5.81177E-05	9.60054E-06	4.44592E-05	4.50413E-06	3.6616E-05	7.31941E-07	3.87864E-06
BRANCHED-CHAIN-AA-SYN-PWY: superpathway of branched amino acid biosynthesis	0.000439426	0.000104766	0.000398842	0.000319163	0.000648494	0.000335185	0.000418775	0.000372919	0.000282645	0.00029783	0.000187519	0.000270852
CALVIN-PWY: Calvin-Benson-Bassham cycle	0.000524148	0.000491844	0.000433773	0.000581199	0.000586031	0.000358629	0.000514221	0.000394769	0.000417663	0.00037184	0.000248823	0.000335296
CATECHOL-ORTHO-CLEAVAGE-PWY: catechol degradation to &beta;-ketoadipate	0	0	0	0	0	0	0	1.30791E-06	0	0	0	0
CENTFERM-PWY: pyruvate fermentation to butanoate	4.85446E-05	1.74934E-05	1.21006E-05	1.1593E-05	3.10744E-05	2.52767E-05	5.08152E-05	1.51818E-05	1.34109E-05	2.11119E-05	4.02659E-06	0
CITRULBIO-PWY: L-citrulline biosynthesis	4.37874E-05	7.17272E-05	7.19891E-05	2.00274E-05	1.28184E-05	2.32845E-05	2.76112E-05	4.10228E-05	1.6023E-05	3.15783E-05	3.29011E-05	1.90212E-05
COA-PWY-1: coenzyme A biosynthesis II (mammalian)	0.000565709	0.000652068	0.000520943	0.000558626	0.000590314	0.000429813	0.00068266	0.00049279	0.000553974	0.000538587	0.000505922	0.000536402
COA-PWY: coenzyme A biosynthesis I	0.000226282	0.000159074	0.000235803	0.000184289	0.00034246	0.000150594	0.000190754	0.000226099	9.09525E-05	0.000114802	0.000151037	0.000152648
COBALSYN-PWY: adenosylcobalamin salvage from cobinamide I	0.000258728	0.000268498	9.66589E-05	0.000247406	0.000405551	0.00012682	0.000216177	7.50655E-05	0.000159427	7.30426E-05	2.32893E-05	5.39857E-05
COLANSYN-PWY: colanic acid building blocks biosynthesis	4.8298E-05	0.000142199	0.000106517	1.43235E-05	3.80282E-06	7.58382E-05	7.05326E-05	6.2112E-05	4.61855E-05	6.3328E-05	0.000118677	8.0045E-05
COMPLETE-ARO-PWY: superpathway of aromatic amino acid biosynthesis	0.000587484	0.000580623	0.000469261	0.000610243	0.000670275	0.00040529	0.000636655	0.000471088	0.000458601	0.000377545	0.000450967	0.000441849
CRNFORCAT-PWY: creatinine degradation I	3.92961E-06	0	5.05167E-06	6.15387E-06	1.14001E-05	3.0141E-05	1.25384E-05	9.09652E-06	9.28366E-06	6.08085E-06	6.29727E-07	0
DAPLYSINESYN-PWY: L-lysine biosynthesis I	4.53487E-05	4.32021E-06	0.000141255	2.45801E-05	3.19989E-05	0.000109249	3.56618E-05	0.000112577	4.41253E-05	0.000104511	4.08578E-06	2.50189E-05
DENOVOPURINE2-PWY: superpathway of purine nucleotides de novo biosynthesis II	0.000227561	0.000192809	0.000195933	0.000183299	4.69418E-05	0.00021154	0.000269359	0.000258962	0.000239254	0.000220024	0.000177813	0.000193827
DTDPRHAMSYN-PWY: dTDP-L-rhamnose biosynthesis I	0.00036913	0.000382463	0.000384185	0.000546016	0.000662169	0.000260985	0.000509407	0.000262718	0.000328439	0.000297246	0.000315251	0.000300792
ECASYN-PWY: enterobacterial common antigen biosynthesis	0	1.08618E-06	2.85831E-06	0	1.68426E-06	1.36355E-05	0	1.09453E-05	0	0	3.59239E-07	8.69182E-07
ENTBACSYN-PWY: enterobactin biosynthesis	0	7.81502E-06	2.14362E-05	2.05462E-06	8.01758E-06	5.21398E-05	1.94072E-06	3.19566E-05	0	6.32833E-06	3.24056E-06	8.62103E-06
FAO-PWY: fatty acid &beta;-oxidation I	6.24684E-06	1.10675E-05	1.5148E-05	1.25473E-05	1.32314E-05	2.74159E-05	8.18222E-06	2.72729E-05	6.44507E-06	1.47551E-05	9.71708E-07	6.34938E-06
FASYN-ELONG-PWY: fatty acid elongation -- saturated	1.31865E-05	4.68349E-06	2.28536E-05	4.00295E-06	1.88977E-06	6.16184E-05	8.61633E-06	4.18212E-05	3.93829E-06	3.59253E-05	5.44466E-07	2.70723E-06
FASYN-INITIAL-PWY: superpathway of fatty acid biosynthesis initiation (E. coli)	8.38387E-06	2.94181E-06	1.47025E-05	2.53174E-06	1.2493E-06	4.45538E-05	5.45085E-06	2.8023E-05	2.46993E-06	2.3676E-05	3.40384E-07	1.69868E-06
FERMENTATION-PWY: mixed acid fermentation	0.000157519	9.04672E-06	1.93582E-05	2.50644E-06	6.02296E-06	0.000131685	0.000192819	3.75073E-05	4.40394E-07	8.65136E-05	1.32883E-06	3.47002E-06
FOLSYN-PWY: superpathway of tetrahydrofolate biosynthesis and salvage	0	1.26537E-05	7.29169E-05	4.55536E-05	8.11299E-05	0.08021	4.35799E-05	0.000118752	5.88908E-06	2.82697E-05	9.66071E-06	2.63391E-05
FUC-RHAMCAT-PWY: superpathway of fucose and rhamnose degradation	9.21727E-06	6.19182E-06	2.31496E-05	3.24884E-06	1.51675E-05	7.16328E-05	6.87521E-07	5.06158E-05	6.14028E-07	6.92702E-06	2.9547E-06	5.16279E-06
FUCCAT-PWY: fucose degradation	4.35187E-05	2.99565E-05	1.82855E-05	4.23748E-06	3.90285E-05	0.07756	1.47203E-05	6.40305E-05	2.29926E-05	7.99176E-06	1.38627E-06	2.41588E-06
GALACT-GLUCUROCAT-PWY: superpathway of hexuronide and hexuronate degradation	0.000161031	4.4621E-05	0.000150515	9.12896E-05	0.000334923	0.000112174	0.000117565	8.8009E-05	0.000116505	8.30188E-05	7.35637E-05	7.41707E-05
GALACTARDEG-PWY: D-galactarate degradation I	0	3.49969E-06	3.54573E-06	7.98027E-07	2.07806E-06	4.98914E-06	3.02883E-07	1.29526E-05	0	4.40369E-07	2.00001E-06	1.74224E-06
GALACTUROCAT-PWY: D-galacturonate degradation I	0.000161884	3.14558E-05	0.000136205	9.71525E-05	0.000331302	0.000110224	0.000118144	9.46147E-05	0.00012906	7.73581E-05	6.00748E-05	7.98409E-05
GLCMANNANAUT-PWY: superpathway of N-acetylglucosamine, N-acetylmannosamine and N-acetylneuraminate degradation	0.000284547	8.50587E-05	0.000165016	0.000107348	0.000327809	0.000145026	0.000144524	9.54841E-05	0.000110005	9.41984E-05	0.000140838	0.000129966
GLUCARDEG-PWY: D-glucarate degradation I	0	2.84864E-06	3.24372E-06	3.93685E-07	1.81088E-06	4.94872E-06	2.43397E-07	1.29878E-05	0	1.15095E-07	1.86386E-06	1.77326E-06
GLUCARGALACTSUPER-PWY: superpathway of D-glucarate and D-galactarate degradation	0	3.49969E-06	3.54573E-06	7.98027E-07	2.07806E-06	4.98914E-06	3.02883E-07	1.29526E-05	0	4.40369E-07	2.00001E-06	1.74224E-06
GLUCONEO-PWY: gluconeogenesis I	6.06729E-05	3.82198E-05	5.56019E-05	5.17405E-05	2.34191E-05	0.000105951	9.00415E-05	0.000206665	7.95817E-05	8.8504E-05	4.12616E-05	5.31195E-05
GLUCOSE1PMETAB-PWY: glucose and glucose-1-phosphate degradation	0	9.56592E-06	1.14146E-05	1.9165E-06	8.30163E-06	8.23429E-05	1.97675E-06	2.22848E-05	5.36891E-07	1.97504E-06	1.50048E-06	3.86077E-06
GLUCUROCAT-PWY: superpathway of &beta;-D-glucuronide and D-glucuronate degradation	0.000173603	5.22791E-05	0.000152409	8.74428E-05	0.000335892	0.000109308	0.0001123	8.09851E-05	0.000107003	7.89845E-05	7.69852E-05	6.47288E-05
GLUDEG-I-PWY: GABA shunt	8.00686E-06	2.62452E-06	1.56022E-05	9.78022E-07	3.59829E-07	5.21786E-05	6.78349E-07	2.53563E-05	3.05894E-05	9.30189E-07	0.001481	3.25044E-06
GLUTORN-PWY: L-ornithine biosynthesis	6.93928E-05	7.63134E-05	7.78282E-05	6.04832E-05	0.000186143	0.000149057	8.42324E-05	0.000103372	6.8423E-05	3.44192E-05	2.29913E-05	3.33043E-05
GLYCOCAT-PWY: glycogen degradation I (bacterial)	0.000126136	2.54979E-07	4.95338E-05	3.30209E-06	5.71893E-07	4.57272E-05	4.88358E-05	1.05534E-05	2.81044E-05	1.62036E-05	9.34739E-06	4.68449E-05
GLYCOGENSYNTH-PWY: glycogen biosynthesis I (from ADP-D-Glucose)	0.000156889	0.000301485	0.000142966	0.00045052	0.000446155	0.000179983	0.000369243	0.000146425	0.000160112	9.30556E-05	0.000131336	0.00019692
GLYCOL-GLYOXDEG-PWY: superpathway of glycol metabolism and degradation	0	1.33227E-06	2.34509E-06	3.88112E-07	2.80849E-06	1.9969E-05	1.39703E-07	1.4867E-05	1.24574E-07	5.79008E-08	6.00263E-07	5.1645E-07
GLYCOLYSIS-E-D: superpathway of glycolysis and Entner-Doudoroff	1.86352E-05	2.33798E-05	6.40998E-05	2.18187E-05	5.58728E-06	8.30933E-05	5.49132E-05	6.58803E-05	5.04061E-05	5.29056E-05	1.31767E-05	2.27849E-05
GLYCOLYSIS-TCA-GLYOX-BYPASS: superpathway of glycolysis, pyruvate dehydrogenase, TCA, and glyoxylate bypass	0	4.47035E-06	1.85556E-05	5.13302E-06	3.61068E-06	7.00644E-05	1.90489E-06	4.83616E-05	1.52062E-06	4.34941E-07	2.32602E-06	3.79251E-06
GLYCOLYSIS: glycolysis I (from glucose 6-phosphate)	4.46207E-05	0.00019512	0.000152772	3.40438E-05	1.41765E-05	0.000189297	8.48025E-05	0.000259303	8.24626E-05	8.89938E-05	0.000212283	0.000109337
GLYOXYLATE-BYPASS: glyoxylate cycle	0	6.1277E-06	9.26924E-06	0.001381	4.30653E-06	0.05025	7.03483E-07	2.34865E-05	6.39742E-07	0.0006376	1.01779E-06	2.15681E-06
GOLPDLCAT-PWY: superpathway of glycerol degradation to 1,3-propanediol	0.000123021	5.83812E-06	2.02807E-05	3.61075E-05	5.42158E-05	1.24425E-05	1.54505E-05	1.70065E-05	5.64952E-06	1.29793E-05	8.24263E-06	8.41238E-06
HCAMHPDEG-PWY: 3-phenylpropanoate and 3-(3-hydroxyphenyl)propanoate degradation to 2-oxopent-4-enoate	0	4.79995E-07	3.95382E-06	2.23432E-07	9.56333E-07	3.68714E-07	0	6.2307E-06	0	0	0	3.65358E-07
HEME-BIOSYNTHESIS-II: heme biosynthesis I (aerobic)	5.39472E-06	1.26737E-05	1.60954E-05	3.98713E-07	0	2.20281E-05	1.0376E-05	2.14235E-05	1.29947E-05	9.81504E-06	3.5796E-06	1.43926E-05
HEMESYN2-PWY: heme biosynthesis II (anaerobic)	1.04757E-05	1.3262E-05	1.87947E-05	1.06637E-06	2.11772E-06	3.19639E-05	1.08087E-05	4.52832E-05	1.73606E-05	1.1341E-05	0.006404	1.59757E-05
HEXITOLDEGSUPER-PWY: superpathway of hexitol degradation (bacteria)	4.98521E-05	3.36112E-05	0.000128618	3.88798E-05	6.34639E-06	0.00011213	5.76856E-05	8.94399E-05	3.22551E-05	6.16613E-05	4.60783E-05	7.77625E-05
HISDEG-PWY: L-histidine degradation I	1.24446E-05	1.05302E-05	4.58633E-06	2.57952E-05	1.39185E-05	6.84654E-05	2.90418E-05	8.82383E-05	0.000104907	9.25278E-05	2.19538E-05	2.77819E-05
HISTSYN-PWY: L-histidine biosynthesis	0.000256912	0.000188497	0.000285572	0.00022565	0.000279557	0.000220637	0.000209833	0.000166703	0.000199587	0.000157547	0.000171797	0.000177451
HOMOSER-METSYN-PWY: L-methionine biosynthesis I	0.000137876	0.000191247	0.000107935	0.000149057	0.000129574	0.000123189	0.000130552	9.6799E-05	7.58415E-05	9.56327E-05	1.96874E-05	7.08668E-05
HSERMETANA-PWY: L-methionine biosynthesis III	0.000129479	4.48631E-05	8.30476E-05	0.00013942	9.05444E-05	0.000117847	0.000157076	0.00014763	7.16233E-05	9.00706E-05	1.94292E-05	4.71798E-05
ILEUSYN-PWY: L-isoleucine biosynthesis I (from threonine)	0.000632012	0.000751991	0.000593977	0.000650724	0.000759642	0.000488159	0.000726542	0.000509716	0.00052042	0.000434533	0.000452275	0.000504028
KDO-NAGLIPASYN-PWY: superpathway of (Kdo)2-lipid A biosynthesis	0	1.0384E-06	1.81696E-06	1.97207E-07	8.69459E-07	1.31998E-05	1.12281E-07	7.95838E-06	0	0	3.14803E-07	1.02433E-06
KETOGLUCONMET-PWY: ketogluconate metabolism	0	2.08353E-06	1.06331E-05	2.47621E-06	4.18473E-06	3.08765E-05	1.04681E-06	2.41264E-05	5.17175E-07	3.82708E-07	0	3.78066E-06
LACTOSECAT-PWY: lactose and galactose degradation I	3.32255E-06	3.17982E-05	6.40501E-06	1.23762E-05	2.4399E-06	2.14078E-05	1.73791E-06	6.60319E-05	2.78996E-05	2.73232E-05	4.2637E-06	1.94757E-05
LPSSYN-PWY: superpathway of lipopolysaccharide biosynthesis	0	1.07198E-06	0	3.72771E-07	1.09983E-06	6.49033E-07	1.92164E-07	1.43872E-06	0	0	3.35668E-07	1.97197E-06
MET-SAM-PWY: superpathway of S-adenosyl-L-methionine biosynthesis	0.000207364	0.000304322	0.000187894	0.000242521	0.000200152	0.000204384	0.000218969	0.000151233	0.000126205	0.000166776	4.16984E-05	0.000110292
METHANOGENESIS-PWY: methanogenesis from H2 and CO2	0	0	0	0	5.2934E-07	3.08004E-06	0	0	9.88237E-07	2.20321E-06	0	0
METHGLYUT-PWY: superpathway of methylglyoxal degradation	0	8.47123E-07	9.93487E-07	3.31539E-07	1.48897E-06	1.6583E-05	1.36614E-07	7.70217E-06	0	1.29951E-07	9.86059E-07	5.75288E-07
METSYN-PWY: L-homoserine and L-methionine biosynthesis	0.000221859	0.000271901	0.000174653	0.000229423	0.000211669	0.000189842	0.000213521	0.000160528	0.000130573	0.000157397	3.78012E-05	0.000121226
NAD-BIOSYNTHESIS-II: NAD salvage pathway II	1.9234E-07	1.13733E-05	6.65681E-06	1.68512E-06	5.56871E-06	4.63657E-05	9.11818E-07	4.19224E-05	1.53879E-06	1.29179E-05	2.77343E-06	1.58301E-05
NAGLIPASYN-PWY: lipid IVA biosynthesis	1.0335E-05	2.66914E-06	1.97632E-05	8.56574E-07	2.16033E-06	3.12059E-05	1.58564E-05	2.70179E-05	2.28029E-05	2.93761E-06	6.16777E-07	2.43731E-06
NONMEVIPP-PWY: methylerythritol phosphate pathway I	0.000594957	0.000657741	0.000461526	0.000645664	0.000598095	0.000402834	0.000699452	0.000472134	0.000533495	0.000488899	0.000481172	0.000475346
NONOXIPENT-PWY: pentose phosphate pathway (non-oxidative branch)	0.00053185	0.000380717	0.000378795	0.000460897	0.000676569	0.000350479	0.000512564	0.000351585	0.000303357	0.00025306	0.000237813	0.000285893
OANTIGEN-PWY: O-antigen building blocks biosynthesis (E. coli)	5.73437E-05	5.2103E-05	0.00013882	9.60265E-05	0.000254324	0.00010837	0.000116566	9.63103E-05	5.67256E-05	5.7467E-05	1.71344E-05	5.35527E-05
ORNARGDEG-PWY: superpathway of L-arginine and L-ornithine degradation	0	1.08616E-06	2.82675E-06	4.1498E-07	2.17458E-06	3.71074E-07	1.54947E-07	9.04233E-06	0	1.14685E-07	3.83579E-07	8.09093E-07
ORNDEG-PWY: superpathway of ornithine degradation	0	8.14634E-07	1.90513E-06	0	2.02752E-06	6.85617E-06	4.40307E-07	0.009131	0	6.80079E-07	2.2808E-07	5.69544E-07
P105-PWY: TCA cycle IV (2-oxoglutarate decarboxylase)	0	4.3381E-06	1.49339E-05	3.19601E-06	7.52513E-06	5.88441E-05	5.54073E-07	4.03657E-05	1.33863E-06	0	1.63557E-06	3.77616E-06
P108-PWY: pyruvate fermentation to propanoate I	1.89335E-05	2.79512E-06	1.18335E-05	1.67736E-06	0	3.04521E-05	6.68744E-06	8.53784E-05	1.75444E-06	9.42909E-06	8.23879E-07	2.89357E-06
P122-PWY: heterolactic fermentation	0	0	2.11342E-06	1.83686E-06	9.19923E-07	2.44462E-06	1.3787E-06	8.2337E-06	1.05583E-06	2.8587E-06	2.01927E-07	4.10814E-06
P124-PWY: Bifidobacterium shunt	2.97333E-05	5.36058E-05	1.95143E-05	8.78897E-05	3.71295E-05	4.2543E-05	7.00179E-05	4.67829E-05	3.96875E-05	5.47914E-05	0	6.32515E-05
P125-PWY: superpathway of (R,R)-butanediol biosynthesis	0	1.54477E-07	0	3.33137E-07	9.94181E-07	0	4.30278E-07	0	1.34214E-07	0	0	1.21229E-06
P161-PWY: acetylene degradation	1.3707E-05	8.66772E-06	2.38058E-05	1.23178E-05	1.61877E-05	3.9166E-05	3.42141E-05	3.06468E-05	7.1162E-06	2.34765E-05	6.2731E-06	1.63672E-05
P162-PWY: L-glutamate degradation V (via hydroxyglutarate)	1.79027E-05	1.54007E-05	9.32004E-06	1.92777E-05	1.18442E-05	4.84333E-05	1.81978E-05	4.23112E-05	3.70134E-05	2.28811E-05	4.23599E-06	8.30011E-06
P163-PWY: L-lysine fermentation to acetate and butanoate	0	0	0	0	0	0	0	0	0	6.49817E-06	0	0
P164-PWY: purine nucleobases degradation I (anaerobic)	4.62107E-05	1.2565E-05	1.02202E-05	5.27626E-05	3.14184E-05	4.58354E-05	1.60176E-05	4.80235E-05	2.32966E-05	3.0692E-05	2.75304E-05	1.59387E-05
P185-PWY: formaldehyde assimilation III (dihydroxyacetone cycle)	3.78729E-05	6.57559E-06	6.80931E-05	2.63078E-05	1.18165E-05	3.53456E-05	4.67649E-05	2.48601E-05	1.67691E-05	2.89622E-05	2.06273E-05	2.8196E-05
P23-PWY: reductive TCA cycle I	0	3.72445E-06	4.54844E-06	2.00816E-06	1.74141E-06	5.3424E-05	6.58043E-07	2.18E-05	0	0.006186	5.86575E-07	3.02419E-06
P4-PWY: superpathway of L-lysine, L-threonine and L-methionine biosynthesis I	6.7061E-05	7.41179E-06	0.000140018	3.89514E-05	5.06223E-05	0.000120742	5.32322E-05	0.000119685	5.9602E-05	9.17791E-05	6.39533E-06	3.72352E-05
P42-PWY: incomplete reductive TCA cycle	8.60362E-05	9.91296E-05	9.32718E-05	3.50999E-05	1.15172E-05	0.000104544	9.39307E-05	8.7137E-05	6.76235E-05	0.000105625	2.8864E-05	7.22212E-05
P441-PWY: superpathway of N-acetylneuraminate degradation	5.04367E-05	2.46402E-05	6.81952E-05	3.76361E-05	1.97827E-05	9.61407E-05	7.34751E-05	7.97244E-05	3.15144E-05	5.7572E-05	2.02465E-05	4.36811E-05
P461-PWY: hexitol fermentation to lactate, formate, ethanol and acetate	0.000157234	1.31506E-05	9.39356E-05	8.10094E-05	3.74185E-06	5.51066E-05	3.59796E-05	4.01543E-05	8.03983E-06	3.2061E-05	1.18405E-05	5.26529E-05
P562-PWY: myo-inositol degradation I	0	0	0	0	0	1.81993E-06	0	7.42332E-07	0	0	0	0
PANTO-PWY: phosphopantothenate biosynthesis I	0.00044038	0.000451023	0.000415721	0.000393516	0.000343692	0.000313924	0.000550325	0.000356299	0.000423769	0.000356668	0.000402066	0.00044805
PANTOSYN-PWY: pantothenate and coenzyme A biosynthesis I	0.000311749	0.000248587	0.000301459	0.000265219	0.000291339	0.000204824	0.000294234	0.000284474	0.000161187	0.000186895	0.000227731	0.000236884
PENTOSE-P-PWY: pentose phosphate pathway	7.80119E-05	2.48934E-05	5.64308E-05	5.83523E-05	9.34581E-06	7.83463E-05	8.45987E-05	5.97658E-05	5.90566E-05	6.95701E-05	9.49882E-06	1.84628E-05
PEPTIDOGLYCANSYN-PWY: peptidoglycan biosynthesis I (meso-diaminopimelate containing)	0.000616318	0.000670945	0.00050312	0.000660692	0.000605299	0.00045564	0.00067938	0.000536233	0.000538076	0.000546126	0.000507796	0.000499885
PHOSLIPSYN-PWY: superpathway of phospholipid biosynthesis I (bacteria)	0.000113466	0.000185767	0.000180107	4.04601E-05	1.16226E-05	0.000192598	0.000112891	0.00020316	8.64949E-05	9.1699E-05	0.000264781	0.000129345
POLYAMINSYN3-PWY: superpathway of polyamine biosynthesis II	8.1661E-05	8.14985E-07	4.9289E-06	0	6.64049E-06	5.95954E-05	6.75044E-06	2.22557E-05	0	4.03731E-06	0	7.78478E-07
POLYAMSYN-PWY: superpathway of polyamine biosynthesis I	0.00017407	1.45048E-05	3.91041E-05	5.88959E-05	8.58544E-05	9.21142E-05	0.000105876	5.46977E-05	5.10962E-05	3.54424E-05	3.25252E-05	2.24707E-05
POLYISOPRENSYN-PWY: polyisoprenoid biosynthesis (E. coli)	0	3.28931E-06	4.37651E-06	1.73797E-06	3.17616E-06	2.53376E-05	1.27972E-06	4.00711E-05	8.89295E-07	1.9553E-06	1.57587E-06	3.04473E-06
PPGPPMET-PWY: ppGpp biosynthesis	1.24431E-05	8.04309E-06	4.93431E-05	4.67928E-05	4.50022E-06	0.02884	7.02684E-06	3.70921E-05	1.67746E-06	9.06626E-06	9.19779E-07	1.6467E-05
PROTOCATECHUATE-ORTHO-CLEAVAGE-PWY: protocatechuate degradation II (ortho-cleavage pathway)	0	0	0	0	0	2.27892E-07	0	1.92939E-06	0	0	0	0
PRPP-PWY: superpathway of histidine, purine, and pyrimidine biosynthesis	0.000194664	6.0112E-05	0.000152344	9.65151E-05	3.79181E-05	0.000158423	0.000154803	0.000202079	0.000146079	0.000151497	7.32421E-05	9.59771E-05
PWY-1042: glycolysis IV (plant cytosol)	0.000647899	0.000568825	0.000634202	0.000707238	0.000750472	0.000420389	0.000514009	0.000500583	0.00048842	0.00050532	0.00030024	0.000423818
PWY-1269: CMP-3-deoxy-D-manno-octulosonate biosynthesis I	0.000142428	0.000117937	0.000108783	1.86982E-05	7.26465E-06	0.000115386	0.000128241	0.00018686	7.33797E-05	0.000111509	0.000175001	8.71468E-05
PWY-1861: formaldehyde assimilation II (RuMP Cycle)	0	0	4.8985E-06	1.85996E-06	6.77274E-06	1.49928E-06	5.14567E-06	5.65406E-06	1.63948E-06	6.15216E-07	0	0
PWY-241: C4 photosynthetic carbon assimilation cycle, NADP-ME type	6.31259E-05	5.48124E-06	1.78992E-06	1.56056E-06	3.66346E-06	4.39418E-05	6.05745E-05	1.11229E-05	0	5.16785E-05	2.7887E-07	2.15518E-06
PWY-2723: trehalose degradation V	0	1.27634E-07	5.04533E-06	1.6597E-06	2.86181E-07	2.63884E-05	0	4.78511E-06	0	0	5.82406E-07	2.8067E-06
PWY-2941: L-lysine biosynthesis II	7.62202E-05	5.06645E-05	4.61332E-05	0.000116172	3.17404E-05	0.000123786	3.12816E-05	0.000179677	4.75321E-05	8.85264E-05	5.17726E-05	8.87326E-05
PWY-2942: L-lysine biosynthesis III	0.00056114	0.000604097	0.000468666	0.000455096	0.000471664	0.000383911	0.000544482	0.0004533	0.000525592	0.000479532	0.000505887	0.000450527
PWY-3001: superpathway of L-isoleucine biosynthesis I	0.000358437	0.000119994	0.000342708	0.000254882	0.000478383	0.000280085	0.00036059	0.000302315	0.000247833	0.000264285	0.000179565	0.00023225
PWY-3781: aerobic respiration I (cytochrome c)	0	9.63043E-07	1.62995E-06	1.17797E-06	1.40569E-06	0	0	0	0	0	0	0
PWY-3841: folate transformations II	0.000362098	0.000557127	0.000350289	0.000350784	0.000382517	0.000272317	0.000338264	0.000325257	0.000427481	0.000349516	0.000368827	0.000376767
PWY-4041: &gamma;-glutamyl cycle	0	1.50507E-06	6.61265E-06	1.17033E-06	3.05044E-06	2.5506E-05	3.53897E-07	1.65393E-05	2.58725E-07	2.35376E-07	1.20205E-06	5.49613E-06
PWY-4242: pantothenate and coenzyme A biosynthesis III	0.000159721	0.000126442	0.000109533	7.78231E-05	0.000253007	9.79559E-05	0.000108393	0.000202414	4.83026E-05	7.02324E-05	0.000141861	9.30314E-05
PWY-4702: phytate degradation I	6.7722E-06	3.55993E-06	2.12648E-06	5.61821E-07	5.12038E-07	1.3962E-05	2.19587E-06	6.56026E-05	1.01904E-06	2.7708E-06	3.60336E-07	1.93138E-06
PWY-4981: L-proline biosynthesis II (from arginine)	4.97032E-05	3.00173E-05	2.35032E-05	4.02327E-05	2.46333E-05	0.000116187	4.16524E-05	0.000110195	5.6124E-05	7.95102E-05	1.21779E-06	2.41945E-05
PWY-4984: urea cycle	3.77968E-05	6.05322E-05	6.29231E-05	1.70028E-05	1.09786E-05	1.97394E-05	2.35547E-05	3.50036E-05	1.3453E-05	2.67209E-05	2.81617E-05	1.60131E-05
PWY-5004: superpathway of L-citrulline metabolism	0	0	0	0	0	1.77728E-06	0	6.64348E-06	0	0	0	0
PWY-5005: biotin biosynthesis II	4.61159E-05	0	9.95194E-06	3.83988E-06	0	1.24238E-05	2.89383E-06	3.60654E-06	1.10824E-05	5.01506E-06	6.37005E-05	1.88896E-05
PWY-5022: 4-aminobutanoate degradation V	8.03697E-06	2.62073E-06	1.55554E-05	9.83979E-07	7.45851E-06	5.32223E-05	6.78231E-07	2.40785E-05	3.07341E-05	9.30558E-07	1.48377E-06	3.25975E-06
PWY-5030: L-histidine degradation III	2.24437E-05	1.38869E-05	6.69067E-06	2.88796E-05	2.01338E-05	3.33791E-05	3.45854E-05	5.32212E-05	0.000120867	6.5589E-05	5.6714E-07	6.36799E-06
PWY-5083: NAD/NADH phosphorylation and dephosphorylation	0	3.0097E-06	7.55564E-06	8.03126E-07	2.36008E-06	4.46685E-05	7.30951E-07	2.35516E-05	4.85816E-07	9.38787E-07	7.18339E-07	1.32048E-06
PWY-5088: L-glutamate degradation VIII (to propanoate)	0	1.94146E-06	0	0	0	6.08952E-06	0	1.68818E-05	4.44322E-07	5.61963E-06	0	1.92715E-06
PWY-5097: L-lysine biosynthesis VI	0.000584414	0.0006544	0.000476938	0.000533803	0.000530886	0.000388222	0.00061644	0.000461529	0.000519244	0.000485608	0.000500868	0.000466465
PWY-5100: pyruvate fermentation to acetate and lactate II	0.000201264	0.000121958	0.000176739	0.000196777	0.000418041	0.00016506	0.000298295	0.000238148	0.000131238	0.000122958	4.03256E-05	0.000118867
PWY-5101: L-isoleucine biosynthesis II	3.20226E-05	6.74874E-05	0.000143744	6.27496E-05	6.40298E-05	7.24015E-05	5.94032E-05	3.7577E-05	0.000200894	0.00013656	7.29257E-05	0.000118027
PWY-5103: L-isoleucine biosynthesis III	0.000400518	8.12926E-05	0.000360755	0.000279186	0.000646873	0.000306301	0.000373632	0.000343177	0.000243937	0.000264399	0.000156293	0.000234401
PWY-5104: L-isoleucine biosynthesis IV	0.000106327	6.73E-05	0.000105293	0.000190853	0.000315408	0.000117595	0.000290085	0.000105419	8.50641E-05	0.000108734	2.23902E-05	0.000103311
PWY-5121: superpathway of geranylgeranyl diphosphate biosynthesis II (via MEP)	3.8493E-05	3.01622E-06	3.09114E-05	2.83495E-05	3.4612E-05	6.6378E-05	1.33431E-05	0.000109162	2.45462E-05	2.86409E-05	3.1488E-06	3.98547E-05
PWY-5136: fatty acid &beta;-oxidation II (peroxisome)	5.27365E-06	1.00242E-05	1.30234E-05	1.10149E-05	1.11176E-05	1.72977E-05	6.92031E-06	2.4789E-05	5.46262E-06	1.30401E-05	5.36702E-07	5.4403E-06
PWY-5138: unsaturated, even numbered fatty acid &beta;-oxidation	0	7.33271E-08	2.96598E-06	3.17217E-07	1.36729E-06	1.75896E-06	1.00787E-07	2.37155E-06	0	0	5.24165E-08	1.22743E-06
PWY-5154: L-arginine biosynthesis III (via N-acetyl-L-citrulline)	7.15435E-05	0.000105442	0.000112078	6.01528E-05	7.75295E-05	0.00015258	0.000106481	0.00013192	0.000103751	5.55234E-05	3.73457E-05	5.2634E-05
PWY-5173: superpathway of acetyl-CoA biosynthesis	0	6.74754E-07	3.29167E-06	1.70731E-07	3.31644E-07	1.19578E-05	2.95701E-07	3.75049E-05	5.06507E-08	1.40317E-06	1.52606E-07	3.88852E-07
PWY-5177: glutaryl-CoA degradation	0.00010851	3.95611E-05	8.87131E-05	6.51636E-05	0.000287431	7.25746E-05	0.00012101	5.28897E-05	8.29524E-05	5.50348E-05	1.90996E-05	5.2671E-05
PWY-5180: toluene degradation I (aerobic) (via o-cresol)	0	2.87741E-06	0	0	0	2.90692E-07	0	1.21472E-05	0	0	0	0
PWY-5182: toluene degradation II (aerobic) (via 4-methylcatechol)	0	2.87741E-06	0	0	0	2.90692E-07	0	1.21472E-05	0	0	0	0
PWY-5188: tetrapyrrole biosynthesis I (from glutamate)	0.000202314	0.000127249	0.000114028	0.000184774	0.000157592	0.000106952	0.000191709	0.000170914	8.30982E-05	9.29326E-05	0.000156445	0.000141179
PWY-5189: tetrapyrrole biosynthesis II (from glycine)	8.41216E-06	1.66299E-06	1.76682E-05	2.50806E-05	7.25879E-05	4.04291E-05	1.09118E-05	1.69484E-05	2.30171E-06	8.62314E-06	1.64588E-05	4.56529E-06
PWY-5198: factor 420 biosynthesis	0	0	0	0	1.80936E-07	3.20957E-06	0	0	1.07695E-06	2.99982E-06	0	0
PWY-5304: superpathway of sulfur oxidation (Acidianus ambivalens)	3.20985E-05	8.41188E-05	2.87655E-05	5.83889E-05	3.29434E-05	1.04738E-05	5.97571E-05	1.32651E-05	2.21665E-05	1.66917E-05	0	3.10609E-05
PWY-5345: superpathway of L-methionine biosynthesis (by sulfhydrylation)	4.58342E-05	0.009668	0.02851	8.73589E-05	2.51341E-05	6.81978E-05	0.000117951	0.000155138	1.08221E-05	4.67264E-05	2.39836E-05	1.82137E-05
PWY-5347: superpathway of L-methionine biosynthesis (transsulfuration)	0.000203129	0.000209448	0.00018074	0.000194104	0.000218033	0.0001832	0.000188184	0.000154043	0.000125664	0.00015237	4.18325E-05	0.000122838
PWY-5367: petroselinate biosynthesis	6.41486E-05	0.000262426	1.33022E-05	0.000189587	5.94182E-05	6.3359E-05	8.63172E-05	7.53015E-05	4.04166E-05	9.05338E-06	4.84158E-07	5.60056E-06
PWY-5384: sucrose degradation IV (sucrose phosphorylase)	2.16384E-05	7.98695E-06	5.01634E-06	1.65472E-06	0.000133408	2.7937E-05	5.83882E-05	5.57473E-05	1.10811E-05	2.19772E-07	5.82282E-07	2.89157E-06
PWY-5415: catechol degradation I (meta-cleavage pathway)	0	1.37196E-06	0	0	0	1.36543E-07	0	7.94532E-07	0	0	0	0
PWY-5417: catechol degradation III (ortho-cleavage pathway)	0	0	0	0	0	0	0	1.44618E-06	0	0	0	0
PWY-5431: aromatic compounds degradation via &beta;-ketoadipate	0	0	0	0	0	0	0	1.44618E-06	0	0	0	0
PWY-5464: superpathway of cytosolic glycolysis (plants), pyruvate dehydrogenase and TCA cycle	0	4.71187E-06	4.54645E-06	9.42328E-07	1.54846E-06	3.86036E-05	1.6401E-06	7.18403E-05	3.00434E-07	5.05983E-06	4.47857E-07	2.05956E-06
PWY-5484: glycolysis II (from fructose 6-phosphate)	4.39371E-05	0.000195237	0.000151555	3.3379E-05	1.38429E-05	0.000179997	8.15753E-05	0.00023622	8.23071E-05	8.84231E-05	0.000210498	0.000108992
PWY-5505: L-glutamate and L-glutamine biosynthesis	1.80201E-05	3.59484E-05	2.81958E-05	3.59005E-05	1.20658E-05	5.29624E-05	5.64872E-05	6.66242E-05	2.7335E-05	3.05775E-05	5.16956E-06	3.62838E-05
PWY-561: superpathway of glyoxylate cycle and fatty acid degradation	0	2.54362E-06	1.07802E-05	1.51331E-06	5.34721E-06	2.86007E-05	3.58952E-07	0.02743	9.80675E-07	0	6.58873E-07	2.33119E-06
PWY-5656: mannosylglycerate biosynthesis I	0	1.86507E-06	1.51796E-06	0	0	1.08142E-07	0	1.15031E-05	0	0	3.97613E-07	6.35645E-07
PWY-5659: GDP-mannose biosynthesis	0.000148443	0.000427889	0.000190079	0.000368857	0.000515957	0.000155261	0.000194606	0.000201926	0.000136317	0.000145271	0.000193099	0.000104009
PWY-5667: CDP-diacylglycerol biosynthesis I	0.00059948	0.000608451	0.000517052	0.000559394	0.00065048	0.000415462	0.000645009	0.000429412	0.000560389	0.000431227	0.000543724	0.000521752
PWY-5675: nitrate reduction V (assimilatory)	0	0	0	0	0	0	0	4.02144E-07	0	0	0	0
PWY-5676: acetyl-CoA fermentation to butanoate II	7.2774E-05	3.69729E-05	4.65387E-05	6.59233E-05	6.95126E-05	0.00010195	4.27581E-05	7.96135E-05	4.71498E-05	7.11913E-05	1.12265E-05	3.61785E-05
PWY-5686: UMP biosynthesis	0.000685258	0.00069577	0.000547696	0.00065318	0.000738862	0.000490063	0.000673098	0.00050185	0.000563654	0.000547275	0.000487043	0.000512591
PWY-5690: TCA cycle II (plants and fungi)	0.000123809	3.99806E-05	4.37907E-05	2.53206E-05	9.8738E-06	8.84791E-05	3.8796E-05	7.9779E-05	5.62515E-05	5.45303E-05	5.35548E-06	1.36446E-05
PWY-5692: allantoin degradation to glyoxylate II	0	3.37012E-07	7.09674E-07	3.57766E-07	1.35946E-06	6.63406E-06	2.20542E-07	5.7491E-06	0	1.81872E-07	1.88632E-07	8.97943E-07
PWY-5695: urate biosynthesis/inosine 5'-phosphate degradation	0.000389501	0.000593073	0.000352043	0.000288528	0.000319517	0.000332209	0.000376342	0.000346099	0.000480474	0.000442779	0.000340737	0.000361772
PWY-5705: allantoin degradation to glyoxylate III	0	5.70806E-07	1.87461E-06	8.46553E-07	1.60876E-06	1.10388E-05	2.20542E-07	8.30552E-06	2.33374E-07	1.81872E-07	1.88632E-07	1.57782E-06
PWY-5723: Rubisco shunt	0	3.1727E-06	1.40689E-05	1.31822E-06	6.59643E-06	6.40558E-05	0	3.06807E-05	0	0	1.03813E-06	5.5674E-06
PWY-5747: 2-methylcitrate cycle II	0	0	5.63019E-07	0	0	0.0006981	0	3.92318E-06	0	0	0	9.34379E-08
PWY-5791: 1,4-dihydroxy-2-naphthoate biosynthesis II (plants)	7.98923E-07	2.52565E-06	5.76898E-06	3.33272E-06	2.17592E-06	3.6548E-05	1.8632E-06	1.70109E-05	1.01127E-06	3.92205E-06	1.65549E-06	5.76326E-06
PWY-5837: 1,4-dihydroxy-2-naphthoate biosynthesis I	7.98923E-07	2.52565E-06	5.76898E-06	3.33272E-06	2.17592E-06	3.6548E-05	1.8632E-06	1.70109E-05	1.01127E-06	3.92205E-06	1.65549E-06	5.76326E-06
PWY-5838: superpathway of menaquinol-8 biosynthesis I	0	6.64221E-06	1.43758E-05	4.14391E-06	5.07473E-06	6.12944E-05	3.18894E-06	4.24043E-05	1.24E-06	3.70036E-06	2.17702E-06	1.0779E-05
PWY-5840: superpathway of menaquinol-7 biosynthesis	2.71384E-06	3.89902E-06	1.79471E-05	9.99422E-06	6.64744E-06	7.23801E-05	6.16152E-06	4.04898E-05	3.42449E-06	9.65022E-06	2.17702E-06	9.30575E-06
PWY-5845: superpathway of menaquinol-9 biosynthesis	0	3.89902E-06	1.3497E-05	4.14391E-06	4.60701E-06	6.12944E-05	0	3.89614E-05	1.24E-06	0	2.17702E-06	7.5208E-06
PWY-5850: superpathway of menaquinol-6 biosynthesis I	0	3.89902E-06	1.3497E-05	4.14391E-06	4.60701E-06	6.12944E-05	0	3.89614E-05	1.24E-06	0	2.17702E-06	7.5208E-06
PWY-5855: ubiquinol-7 biosynthesis (prokaryotic)	0	3.18321E-07	3.37932E-06	1.03141E-06	1.50837E-06	1.86744E-05	7.91974E-07	1.11267E-05	3.49668E-07	0	0	4.76462E-07
PWY-5856: ubiquinol-9 biosynthesis (prokaryotic)	0	3.18321E-07	3.37932E-06	1.03141E-06	1.50837E-06	1.86744E-05	7.91974E-07	1.11267E-05	3.49668E-07	0	0	4.76462E-07
PWY-5857: ubiquinol-10 biosynthesis (prokaryotic)	0	3.18321E-07	3.37932E-06	1.03141E-06	1.50837E-06	1.86744E-05	7.91974E-07	1.11267E-05	3.49668E-07	0	0	4.76462E-07
PWY-5860: superpathway of demethylmenaquinol-6 biosynthesis I	0	2.60806E-06	9.17496E-06	2.79454E-06	3.16872E-06	4.62874E-05	0	2.72295E-05	8.27677E-07	0	1.45569E-06	5.06694E-06
PWY-5861: superpathway of demethylmenaquinol-8 biosynthesis	0	4.45347E-06	9.78492E-06	2.79454E-06	3.5017E-06	4.62874E-05	2.13958E-06	2.97628E-05	8.27677E-07	2.47801E-06	1.45569E-06	7.29549E-06
PWY-5862: superpathway of demethylmenaquinol-9 biosynthesis	0	2.60806E-06	9.17496E-06	2.79454E-06	3.16872E-06	4.62874E-05	0	2.72295E-05	8.27677E-07	0	1.45569E-06	5.06694E-06
PWY-5863: superpathway of phylloquinol biosynthesis	9.10532E-07	1.30893E-06	6.33538E-06	3.62054E-06	2.47824E-06	3.1541E-05	2.08824E-06	1.82029E-05	1.14847E-06	4.30406E-06	7.29891E-07	6.20131E-06
PWY-5896: superpathway of menaquinol-10 biosynthesis	0	3.89902E-06	1.3497E-05	4.14391E-06	4.60701E-06	6.12944E-05	0	3.89614E-05	1.24E-06	0	2.17702E-06	7.5208E-06
PWY-5897: superpathway of menaquinol-11 biosynthesis	2.38117E-06	7.47428E-06	1.65471E-05	9.45945E-06	5.94251E-06	7.50775E-05	5.45944E-06	4.51709E-05	3.01457E-06	1.14363E-05	4.90187E-06	1.65083E-05
PWY-5898: superpathway of menaquinol-12 biosynthesis	2.38117E-06	7.47428E-06	1.65471E-05	9.45945E-06	5.94251E-06	7.50775E-05	5.45944E-06	4.51709E-05	3.01457E-06	1.14363E-05	4.90187E-06	1.65083E-05
PWY-5899: superpathway of menaquinol-13 biosynthesis	2.38117E-06	7.47428E-06	1.65471E-05	9.45945E-06	5.94251E-06	7.50775E-05	5.45944E-06	4.51709E-05	3.01457E-06	1.14363E-05	4.90187E-06	1.65083E-05
PWY-5910: superpathway of geranylgeranyldiphosphate biosynthesis I (via mevalonate)	0	0	0	1.05661E-06	2.14961E-06	9.98256E-06	0	1.10783E-05	3.44354E-07	2.93277E-06	0	2.91772E-06
PWY-5913: TCA cycle VI (obligate autotrophs)	0.000123784	4.68538E-06	1.11818E-05	1.2575E-06	3.0315E-06	0.000110384	0.000109025	2.16032E-05	2.20554E-07	7.67581E-05	2.48044E-07	1.76921E-06
PWY-5918: superpathay of heme biosynthesis from glutamate	1.0029E-05	5.52057E-06	2.50799E-05	9.87021E-07	0	3.78684E-05	1.63178E-05	2.80783E-05	5.05361E-06	1.32743E-05	7.92801E-06	9.36585E-06
PWY-5920: superpathway of heme biosynthesis from glycine	0	2.36549E-06	6.94976E-06	4.17584E-07	0	2.64868E-05	1.48223E-06	1.73682E-05	4.42056E-07	3.95912E-07	7.06354E-07	2.77711E-06
PWY-5941: glycogen degradation II (eukaryotic)	3.04116E-05	6.29654E-06	2.63507E-05	3.04517E-05	7.69438E-05	1.02478E-05	2.92218E-05	2.43051E-05	9.50102E-06	2.26983E-05	3.40181E-06	2.78812E-05
PWY-5971: palmitate biosynthesis II (bacteria and plants)	1.55596E-05	5.56361E-06	2.6357E-05	4.74612E-06	2.21932E-06	6.92916E-05	1.01983E-05	4.81781E-05	4.67489E-06	4.00159E-05	6.39454E-07	3.19901E-06
PWY-5973: cis-vaccenate biosynthesis	0.00037761	0.000466822	0.000336047	0.000217384	7.26667E-05	0.000224629	0.000370998	0.000297709	0.000413776	0.000310332	0.000421786	0.000306598
PWY-5989: stearate biosynthesis II (bacteria and plants)	8.15905E-05	0.000236501	1.92961E-05	0.000107995	2.20209E-05	7.85867E-05	9.1273E-05	9.12406E-05	5.44187E-05	2.7301E-05	7.25089E-07	8.21101E-06
PWY-6071: superpathway of phenylethylamine degradation	0	0	0	0	0	0	0	0	0	0	0	5.9677E-07
PWY-6113: superpathway of mycolate biosynthesis	1.61238E-05	5.83318E-06	2.50237E-05	4.97801E-06	2.35282E-06	6.92406E-05	1.06192E-05	4.87717E-05	4.87533E-06	3.40659E-05	6.27798E-07	3.25889E-06
PWY-6121: 5-aminoimidazole ribonucleotide biosynthesis I	0.000527937	0.000501086	0.000432455	0.000554299	0.0006561	0.000413914	0.000621594	0.000434842	0.000409963	0.000395839	0.000418104	0.000395339
PWY-6122: 5-aminoimidazole ribonucleotide biosynthesis II	0.000520989	0.000463105	0.000419829	0.000538086	0.000651917	0.000400404	0.00061777	0.000437473	0.000383795	0.000377928	0.000387644	0.00036483
PWY-6123: inosine-5'-phosphate biosynthesis I	0.000245426	0.00017485	0.000301403	0.000164364	0.00040753	0.000264644	0.000305314	0.000272663	0.000210566	0.000205353	0.000186714	0.000202115
PWY-6124: inosine-5'-phosphate biosynthesis II	0.000217302	0.000151251	0.000276607	0.000143166	0.000381757	0.000242418	0.000276396	0.000249644	0.000186045	0.000182107	0.000164721	0.000180144
PWY-6125: superpathway of guanosine nucleotides de novo biosynthesis II	0.000276225	0.000300945	0.000170412	0.000174989	2.38682E-05	0.00018136	0.000237977	0.000229146	0.000236132	0.00021807	0.000317216	0.000262633
PWY-6126: superpathway of adenosine nucleotides de novo biosynthesis II	0.000348906	0.000351586	0.000251257	0.000324756	0.000444695	0.000326796	0.000309704	0.000280443	0.000303848	0.00031398	0.000376264	0.000327288
PWY-6147: 6-hydroxymethyl-dihydropterin diphosphate biosynthesis I	7.15511E-05	9.35763E-05	7.02078E-05	1.33121E-05	4.75986E-05	2.94149E-05	4.43085E-05	5.14062E-05	5.03647E-05	3.57827E-05	0.000121933	4.36151E-05
PWY-6151: S-adenosyl-L-methionine cycle I	0.000532089	0.000697355	0.000476031	0.000616507	0.000587252	0.000400191	0.000638908	0.000408088	0.000576423	0.000473149	0.000495914	0.00050771
PWY-6163: chorismate biosynthesis from 3-dehydroquinate	0.00063139	0.000649535	0.000484378	0.0007006	0.000748618	0.000422144	0.000685572	0.000473383	0.000476209	0.000396599	0.000465091	0.000467904
PWY-6165: chorismate biosynthesis II (archaea)	0	0	0	0	4.00211E-07	6.78694E-06	0	0	0	0	0	0
PWY-6167: flavin biosynthesis II (archaea)	0	0	0	0	0	1.19711E-05	0	0	2.50088E-06	7.04365E-06	0	0
PWY-6168: flavin biosynthesis III (fungi)	0.000220877	0.000212691	0.00030288	0.000217095	7.61777E-06	0.000213664	0.000248106	0.000251956	0.000232017	0.000258249	0.000250168	0.000301137
PWY-6174: mevalonate pathway II (archaea)	0	0	0	0	4.40553E-07	3.93468E-06	0	0	2.69591E-07	1.59792E-06	0	0
PWY-6185: 4-methylcatechol degradation (ortho cleavage)	0	0	0	0	0	0	0	1.22628E-06	0	0	0	0
PWY-621: sucrose degradation III (sucrose invertase)	0.000274708	0.000163544	0.000199013	0.000216984	0.000536137	0.000172542	0.000190569	0.000188856	0.000114917	9.52317E-05	0.000154622	0.000121626
PWY-622: starch biosynthesis	0	3.35478E-07	0	0	0	7.76206E-07	0	1.32796E-06	0	0	8.04146E-07	9.52745E-07
PWY-6263: superpathway of menaquinol-8 biosynthesis II	0	0	8.98415E-06	9.24696E-07	0	6.30547E-06	2.00993E-06	1.56012E-05	2.25179E-07	1.8305E-06	0	0
PWY-6270: isoprene biosynthesis I	6.02484E-05	7.01985E-05	5.22608E-05	5.84703E-05	5.09141E-05	0.000180247	2.14327E-05	0.00024121	4.00068E-05	5.24764E-05	3.76634E-05	9.49585E-05
PWY-6277: superpathway of 5-aminoimidazole ribonucleotide biosynthesis	0.000520989	0.000463105	0.000419829	0.000538086	0.000651917	0.000400404	0.00061777	0.000437473	0.000383795	0.000377928	0.000387644	0.00036483
PWY-6282: palmitoleate biosynthesis I (from (5Z)-dodec-5-enoate)	1.41496E-05	5.24933E-06	1.80744E-05	4.48264E-06	2.10983E-06	5.68564E-05	9.47235E-06	4.19492E-05	4.32942E-06	2.77476E-05	4.78163E-07	2.7195E-06
PWY-6284: superpathway of unsaturated fatty acids biosynthesis (E. coli)	1.56827E-05	5.82608E-06	1.99821E-05	5.99943E-06	2.77224E-06	6.19881E-05	1.05091E-05	4.61199E-05	4.8053E-06	1.99292E-05	6.43221E-07	3.01957E-06
PWY-6285: superpathway of fatty acids biosynthesis (E. coli)	0	2.12864E-06	2.22731E-05	0.005562	2.5879E-06	6.68222E-05	0	4.60412E-05	2.52744E-06	2.14415E-05	6.73315E-07	3.03856E-06
PWY-6305: putrescine biosynthesis IV	0.000166644	3.76573E-05	9.25097E-05	6.26631E-05	0.000225474	0.000103606	9.76501E-05	0.000109427	7.40394E-05	6.83998E-05	6.05304E-05	3.46037E-05
PWY-6317: galactose degradation I (Leloir pathway)	0.000437847	0.00035966	0.000299775	0.000493406	0.000606006	0.000259378	0.000444361	0.00022701	0.000268219	0.000185655	0.00020292	0.000277639
PWY-6353: purine nucleotides degradation II (aerobic)	0.000152317	0.000133853	5.4273E-05	6.0825E-05	0.000135288	0.000155815	4.94474E-05	0.000163111	2.76896E-05	6.85853E-05	7.16217E-05	4.8734E-05
PWY-6385: peptidoglycan biosynthesis III (mycobacteria)	0.000411909	0.000527415	0.00033566	0.000279718	0.000545827	0.00030276	0.000337934	0.000399237	0.000395967	0.000297501	0.000315698	0.000337279
PWY-6386: UDP-N-acetylmuramoyl-pentapeptide biosynthesis II (lysine-containing)	0.000629473	0.000718971	0.000510042	0.000699149	0.000638207	0.00046498	0.000719724	0.000541049	0.000546226	0.000556629	0.000512428	0.000535441
PWY-6387: UDP-N-acetylmuramoyl-pentapeptide biosynthesis I (meso-diaminopimelate containing)	0.000615546	0.000663996	0.000504775	0.000689691	0.000633703	0.000456929	0.000707936	0.000535793	0.000535704	0.000543993	0.000494774	0.000502887
PWY-6435: 4-hydroxybenzoate biosynthesis V	0	0	2.63589E-06	0	0	2.8688E-06	0	0	0	0	0	8.00251E-07
PWY-6467: Kdo transfer to lipid IVA III (Chlamydia)	0	0	0	0	0	2.03201E-07	0	0	9.07256E-08	0	0	1.00883E-06
PWY-6470: peptidoglycan biosynthesis V (&beta;-lactam resistance)	0	0	1.22757E-06	0	0	0	0	0	0	0	0	0
PWY-6471: peptidoglycan biosynthesis IV (Enterococcus faecium)	2.0405E-05	2.10078E-05	1.17822E-05	5.71745E-05	3.45653E-05	1.98345E-05	6.69531E-06	9.79655E-06	2.15855E-06	7.33132E-06	2.31938E-05	1.97931E-05
PWY-6507: 4-deoxy-L-threo-hex-4-enopyranuronate degradation	0.000167812	2.1992E-05	0.000129799	6.64445E-05	0.000308971	0.000104797	0.000105558	8.91861E-05	0.000127404	6.64413E-05	5.10484E-05	5.68641E-05
PWY-6519: 8-amino-7-oxononanoate biosynthesis I	1.1779E-05	4.57923E-06	2.00795E-05	3.38022E-06	1.77527E-06	5.03055E-05	7.63426E-06	3.68974E-05	3.56588E-06	3.04231E-05	5.75562E-07	3.06088E-06
PWY-6527: stachyose degradation	0.000328126	0.000302447	0.000260281	0.000324552	0.000525115	0.000239353	0.000381148	0.000191179	0.000219188	0.00015221	0.000177428	0.000237737
PWY-6531: mannitol cycle	6.30024E-06	1.20586E-05	4.47043E-05	4.18906E-06	0	8.05469E-06	2.1779E-05	7.61978E-06	6.59062E-06	1.34186E-05	5.38185E-05	1.76341E-05
PWY-6545: pyrimidine deoxyribonucleotides de novo biosynthesis III	0.000232185	0.000203527	0.000125989	0.000123984	1.55235E-05	0.000127514	0.000156096	0.000139899	0.000167992	0.000146256	0.000182574	0.000124106
PWY-6549: L-glutamine biosynthesis III	9.85215E-05	3.6293E-06	2.82092E-06	6.90394E-06	1.28965E-05	5.71591E-05	8.18391E-05	1.68364E-05	2.11443E-05	2.91979E-05	6.30037E-07	9.90818E-06
PWY-6588: pyruvate fermentation to acetone	1.26663E-05	2.00086E-05	3.31152E-05	4.56807E-05	1.87488E-05	3.25483E-05	1.25156E-05	1.94759E-05	1.31049E-05	1.57486E-05	3.63023E-06	1.02757E-05
PWY-6590: superpathway of Clostridium acetobutylicum acidogenic fermentation	5.85525E-05	2.15296E-05	1.52766E-05	1.45962E-05	3.91662E-05	3.12059E-05	6.14202E-05	1.92073E-05	1.67907E-05	2.60148E-05	5.03474E-06	0
PWY-6595: superpathway of guanosine nucleotides degradation (plants)	1.93125E-05	5.06506E-06	1.13509E-05	2.95175E-05	8.92054E-05	2.57972E-05	9.75167E-06	6.69504E-05	1.92266E-05	2.84731E-05	1.70365E-05	8.55186E-06
PWY-6606: guanosine nucleotides degradation II	8.53937E-05	4.36232E-05	1.73141E-05	3.42099E-05	9.81008E-05	4.12062E-05	2.01043E-05	7.41126E-05	2.23844E-05	3.26367E-05	3.12451E-05	1.65939E-05
PWY-6608: guanosine nucleotides degradation III	0.000137904	0.00017924	8.74173E-05	0.00020074	0.000239451	0.000178565	0.000157839	0.000170372	0.000128513	0.000126313	0.000107074	4.75964E-05
PWY-6609: adenine and adenosine salvage III	0.000385751	0.000299537	0.000309209	0.000261393	0.000399925	0.000284314	0.000229693	0.000273054	0.000202523	0.000265523	0.000218911	0.000184722
PWY-6612: superpathway of tetrahydrofolate biosynthesis	0	8.49788E-06	5.27444E-05	3.20117E-05	5.79091E-05	6.07788E-05	3.06404E-05	9.41122E-05	3.94694E-06	1.95296E-05	6.49937E-06	1.79952E-05
PWY-6628: superpathway of L-phenylalanine biosynthesis	0	7.65664E-06	2.62586E-05	9.02636E-06	1.4797E-05	0.000141605	3.49611E-06	8.0884E-05	0	1.13109E-06	1.01858E-05	2.71278E-05
PWY-6629: superpathway of L-tryptophan biosynthesis	0	9.27208E-06	3.11681E-05	1.09528E-05	5.23428E-06	5.25817E-05	6.29627E-07	3.46E-05	0	0	0	8.0961E-06
PWY-6630: superpathway of L-tyrosine biosynthesis	0	7.55053E-06	2.64263E-05	9.00711E-06	5.22299E-05	0.000126521	3.49439E-06	6.13188E-05	1.01486E-05	5.37956E-06	4.44122E-05	3.17627E-05
PWY-6690: cinnamate and 3-hydroxycinnamate degradation to 2-oxopent-4-enoate	0	4.79995E-07	3.95382E-06	2.23432E-07	9.56333E-07	3.68714E-07	0	6.2307E-06	0	0	0	3.65358E-07
PWY-6700: queuosine biosynthesis	0.000544186	0.000501656	0.000414656	0.000292396	0.000238237	0.000375339	0.000454511	0.000415468	0.000501918	0.000434934	0.00051531	0.000456739
PWY-6703: preQ0 biosynthesis	0.00040776	0.000413259	0.000347728	0.000238795	0.000168165	0.000271564	0.000392942	0.000331626	0.000412484	0.000350899	0.000430712	0.000375677
PWY-6708: ubiquinol-8 biosynthesis (prokaryotic)	0	3.18321E-07	3.37932E-06	1.03141E-06	1.50837E-06	1.86744E-05	7.91974E-07	1.11267E-05	3.49668E-07	0	0	4.76462E-07
PWY-6731: starch degradation III	0	0	0	0	0	2.66615E-06	0	2.06861E-06	0	0	0	0
PWY-6737: starch degradation V	0.000721408	0.000759531	0.000643018	0.000862593	0.000861447	0.000533743	0.000821177	0.000524263	0.000624843	0.00050054	0.000602078	0.000648577
PWY-6803: phosphatidylcholine acyl editing	0	1.93714E-06	8.20928E-06	7.50099E-07	1.73773E-06	3.19887E-05	1.05626E-07	1.75919E-05	2.4459E-07	0	1.47347E-06	4.46281E-06
PWY-6823: molybdenum cofactor biosynthesis	0	4.35986E-07	2.16166E-06	3.94026E-07	1.12553E-06	4.80552E-06	0	7.48631E-06	0	1.27209E-07	2.36238E-07	9.61947E-07
PWY-6859: all-trans-farnesol biosynthesis	0	1.10002E-06	3.51982E-06	9.62708E-07	2.32927E-06	2.27745E-05	3.90085E-07	4.18131E-05	2.23278E-06	4.5487E-06	1.14981E-06	1.87393E-06
PWY-6891: thiazole biosynthesis II (Bacillus)	0	4.36906E-06	8.51234E-06	0.0005309	5.68487E-06	4.2796E-05	8.83206E-07	2.43719E-05	1.02777E-06	0	1.94427E-06	3.23847E-07
PWY-6892: thiazole biosynthesis I (E. coli)	6.31482E-05	1.31179E-05	7.41155E-05	8.51841E-05	0.000122268	0.00011325	0.00013099	4.85873E-05	3.66785E-05	4.94459E-05	7.09597E-05	8.93195E-05
PWY-6895: superpathway of thiamin diphosphate biosynthesis II	0	2.10159E-05	3.82523E-05	2.63425E-06	2.48567E-05	0.000122022	4.36132E-06	8.99735E-05	5.07719E-06	0	9.50877E-06	1.61291E-06
PWY-6897: thiamin salvage II	0.000394502	0.000369635	0.00024514	0.000262708	0.000150821	0.00020828	0.000264399	0.000219043	0.000246985	0.000179726	0.000265669	0.000252752
PWY-6901: superpathway of glucose and xylose degradation	5.6802E-05	2.81762E-05	8.23949E-05	4.27067E-05	1.13216E-05	0.000109741	7.42643E-05	9.22685E-05	7.0518E-05	8.37221E-05	1.64602E-05	2.98221E-05
PWY-6936: seleno-amino acid biosynthesis	0.000105971	3.34947E-05	0.000146182	0.000139773	7.05099E-05	0.000162219	0.000207088	0.000223174	6.58692E-05	0.000130546	2.86994E-05	0.000184844
PWY-6969: TCA cycle V (2-oxoglutarate:ferredoxin oxidoreductase)	0.000127766	5.98194E-05	5.50753E-05	3.83905E-05	1.50928E-05	0.000106374	5.66698E-05	0.000101315	8.54055E-05	6.65382E-05	0.008722	2.0096E-05
PWY-7003: glycerol degradation to butanol	2.78913E-05	1.36856E-05	5.90783E-05	3.52133E-05	1.54221E-05	5.34653E-05	2.80231E-05	3.76762E-05	2.35585E-05	2.9735E-05	8.18592E-06	2.14918E-05
PWY-7013: L-1,2-propanediol degradation	0	3.87759E-06	0	9.28593E-08	0	1.73416E-06	1.0511E-06	1.67504E-05	0	0	4.32317E-06	1.13232E-07
PWY-7039: phosphatidate metabolism, as a signaling molecule	0	0	0	0	0	0	0	1.54673E-05	0	0	2.23211E-07	0
PWY-7111: pyruvate fermentation to isobutanol (engineered)	0.000632012	0.000751991	0.000593977	0.000650724	0.000759642	0.000488159	0.000726542	0.000509716	0.00052042	0.000434533	0.000452275	0.000504028
PWY-7115: C4 photosynthetic carbon assimilation cycle, NAD-ME type	8.27161E-06	9.02097E-06	3.10098E-06	3.09141E-06	5.85013E-06	7.05321E-05	3.12703E-05	1.61102E-05	3.81245E-07	9.56541E-06	4.97674E-07	3.68784E-06
PWY-7117: C4 photosynthetic carbon assimilation cycle, PEPCK type	0.000167469	6.9333E-06	2.23594E-06	1.87273E-06	4.37874E-06	0.000133038	0.000120083	1.35146E-05	0	0.000103967	3.35914E-07	2.64762E-06
PWY-7184: pyrimidine deoxyribonucleotides de novo biosynthesis I	0.000229257	0.000211881	0.000138332	0.000132064	1.5445E-05	0.000139786	0.000164584	0.000172279	0.000197499	0.00017495	0.000221769	0.000185645
PWY-7187: pyrimidine deoxyribonucleotides de novo biosynthesis II	0.000207649	0.000160894	0.000177262	0.000182605	3.38795E-05	0.000186643	0.000275095	0.00025133	0.000225594	0.00023266	0.000230909	0.000188977
PWY-7196: superpathway of pyrimidine ribonucleosides salvage	0.000302324	0.000183611	0.00014513	0.000162925	2.21074E-05	0.00014177	0.000166119	0.000143687	0.000112476	0.000108409	9.39312E-05	0.000120494
PWY-7197: pyrimidine deoxyribonucleotide phosphorylation	0.00021471	0.000168425	0.000105821	9.64785E-05	9.33378E-06	0.000102635	0.000169286	0.000188773	0.000160187	0.000142604	0.000162927	0.000138614
PWY-7198: pyrimidine deoxyribonucleotides de novo biosynthesis IV	2.99194E-05	0	1.89199E-05	5.29965E-06	5.70943E-06	1.51239E-05	2.7905E-05	9.11141E-06	1.85516E-05	6.14337E-06	0	2.55788E-06
PWY-7199: pyrimidine deoxyribonucleosides salvage	0.000195724	0.000117383	0.000129029	0.000131501	0.000243794	0.000143064	0.00011352	0.000151433	0.000130258	0.000116311	4.99455E-05	9.61195E-05
PWY-7204: pyridoxal 5'-phosphate salvage II (plants)	0	1.06515E-05	1.07141E-05	1.27074E-06	1.8813E-06	6.64827E-05	3.44202E-07	3.8499E-05	7.90307E-07	1.03789E-06	1.92975E-06	4.41978E-06
PWY-7208: superpathway of pyrimidine nucleobases salvage	0.000356797	0.000390177	0.000150985	0.000222309	0.00030404	0.000150784	0.000248918	0.000262124	0.000238984	0.000204145	0.000299157	0.000257054
PWY-7209: superpathway of pyrimidine ribonucleosides degradation	0	0	2.20707E-05	0	0	2.5831E-06	1.15573E-06	1.43193E-07	8.25962E-06	1.05573E-05	0	3.03918E-07
PWY-7210: pyrimidine deoxyribonucleotides biosynthesis from CTP	4.01012E-05	0	2.49411E-05	7.39482E-06	6.60856E-06	2.03008E-05	3.65509E-05	1.26611E-05	2.50194E-05	8.59295E-06	0	3.62453E-06
PWY-7211: superpathway of pyrimidine deoxyribonucleotides de novo biosynthesis	0.000194603	4.22502E-05	0.000120976	6.52614E-05	2.1265E-05	0.000125897	0.000120194	0.000155191	0.000119261	0.000118258	8.60698E-05	7.78917E-05
PWY-7219: adenosine ribonucleotides de novo biosynthesis	0.000867001	0.00097316	0.000701125	0.000907668	0.00092503	0.000680441	0.0010059	0.000732117	0.000815137	0.000774474	0.000694215	0.000741333
PWY-7220: adenosine deoxyribonucleotides de novo biosynthesis II	0.000194948	0.000189909	0.000136063	0.000176082	0.000262856	0.000195261	0.00016294	0.000154746	0.000166382	0.000176022	0.000235413	0.000189883
PWY-7221: guanosine ribonucleotides de novo biosynthesis	0.00058457	0.000739718	0.000550722	0.000658699	0.000692999	0.000462021	0.000663012	0.000540384	0.000550137	0.000556207	0.00058824	0.000528861
PWY-7222: guanosine deoxyribonucleotides de novo biosynthesis II	0.000194948	0.000189909	0.000136063	0.000176082	0.000262856	0.000195261	0.00016294	0.000154746	0.000166382	0.000176022	0.000235413	0.000189883
PWY-7228: superpathway of guanosine nucleotides de novo biosynthesis I	0.000300723	0.000416401	0.000180941	0.000176792	2.07245E-05	0.000180252	0.000247106	0.000263806	0.000256702	0.000224281	0.000340186	0.000283179
PWY-7229: superpathway of adenosine nucleotides de novo biosynthesis I	0.000403548	0.000436433	0.000300855	0.000387338	0.00050346	0.00037245	0.000433162	0.000366511	0.00035785	0.000364819	0.000423299	0.00037682
PWY-7234: inosine-5'-phosphate biosynthesis III	0.000104256	4.03714E-05	0.000125423	0.000108774	0.000117669	0.000106951	7.34122E-05	0.000185538	8.63851E-05	0.000121	2.34718E-05	4.54809E-05
PWY-7235: superpathway of ubiquinol-6 biosynthesis (eukaryotic)	7.9342E-06	0	0	4.31311E-07	0	0	2.04621E-06	4.3049E-06	0	4.05155E-06	0	0
PWY-7237: myo-, chiro- and scillo-inositol degradation	0.000194276	0	2.74545E-05	0.000102137	0.000105031	4.01182E-05	2.6539E-05	2.12583E-05	6.6984E-06	1.22206E-05	1.46948E-05	1.75612E-05
PWY-7242: D-fructuronate degradation	0.000171532	4.26548E-05	0.000139066	0.000175576	0.000343971	0.000109804	0.000108179	9.06191E-05	0.000127081	6.66127E-05	6.62489E-05	5.99031E-05
PWY-724: superpathway of L-lysine, L-threonine and L-methionine biosynthesis II	0.000450892	0.0004511	0.000380447	0.00042986	0.000496094	0.00034316	0.000477354	0.000389033	0.000429378	0.000368554	0.000295506	0.000312173
PWY-7254: TCA cycle VII (acetate-producers)	0	1.70721E-06	8.11712E-06	1.52133E-05	1.80996E-06	3.51739E-05	9.26665E-07	2.52723E-05	3.64786E-07	1.57322E-07	1.06489E-06	1.2249E-06
PWY-7269: NAD/NADP-NADH/NADPH mitochondrial interconversion (yeast)	0	1.16238E-06	4.47305E-06	1.08529E-06	3.00799E-06	3.1591E-05	9.17851E-07	2.24781E-05	3.42224E-07	0	2.35069E-07	1.85578E-06
PWY-7279: aerobic respiration II (cytochrome c) (yeast)	0	4.92814E-07	1.35499E-06	4.77843E-07	1.10869E-06	0	0	0	0	0	0	0
PWY-7282: 4-amino-2-methyl-5-phosphomethylpyrimidine biosynthesis (yeast)	0.00018371	0.000302684	0.000232696	0.000141435	6.4346E-06	0.000205468	0.000242307	0.000202544	0.0002279	0.000158275	0.000211819	0.00023094
PWY-7286: 7-(3-amino-3-carboxypropyl)-wyosine biosynthesis	0	0	0	0	2.30291E-07	2.32849E-06	0	0	8.68101E-07	1.74703E-06	0	0
PWY-7290: Escherichia coli serotype O86 O-antigen biosynthesis	0	0	0	0	0	0	0	7.86122E-06	0	0	0	4.29199E-07
PWY-7294: xylose degradation IV	0	0	0	0	0	0	0	5.03247E-07	0	0	0	0
PWY-7315: dTDP-N-acetylthomosamine biosynthesis	0	2.95205E-06	5.19496E-06	2.46033E-07	3.12047E-06	3.39204E-05	1.39509E-06	1.45669E-05	9.05365E-08	2.82319E-07	1.06066E-06	1.7359E-06
PWY-7316: dTDP-N-acetylviosamine biosynthesis	0	0	6.78687E-07	0	0	0	0	0	0	0	0	0
PWY-7323: superpathway of GDP-mannose-derived O-antigen building blocks biosynthesis	3.27422E-05	0.000117288	9.10106E-05	8.86602E-06	2.29596E-06	5.7674E-05	5.11349E-05	4.48103E-05	3.15469E-05	5.35336E-05	0.000145078	6.2637E-05
PWY-7328: superpathway of UDP-glucose-derived O-antigen building blocks biosynthesis	1.35383E-05	1.59461E-07	6.58521E-06	2.06779E-06	3.57525E-07	2.99736E-05	8.63876E-06	6.01787E-06	3.00765E-06	1.7E-05	7.25669E-07	3.47563E-06
PWY-7357: thiamin formation from pyrithiamine and oxythiamine (yeast)	0.000513721	0.000402319	0.00025857	0.000358798	0.000576387	0.000255342	0.000354049	0.000234469	0.000232008	0.000159553	0.000268848	0.000254834
PWY-7371: 1,4-dihydroxy-6-naphthoate biosynthesis II	7.89593E-05	0	3.67889E-07	7.32997E-06	0	3.29602E-06	4.02904E-06	4.75702E-06	1.37363E-07	8.97972E-06	0	0
PWY-7383: anaerobic energy metabolism (invertebrates, cytosol)	4.6593E-05	5.58087E-05	7.69075E-05	9.14785E-05	6.31542E-05	0.00016033	8.66696E-05	0.000187457	0.000109546	7.91625E-05	2.59262E-06	8.61286E-05
PWY-7384: anaerobic energy metabolism (invertebrates, mitochondrial)	0	1.29632E-06	0	1.64336E-06	0	0	0	0	2.72046E-07	0	0	2.20816E-06
PWY-7388: octanoyl-[acyl-carrier protein] biosynthesis (mitochondria, yeast)	7.82885E-06	2.7457E-06	1.37459E-05	2.36434E-06	1.16631E-06	4.16075E-05	5.08883E-06	2.60902E-05	2.30618E-06	2.20941E-05	3.17727E-07	1.5855E-06
PWY-7389: superpathway of anaerobic energy metabolism (invertebrates)	0	2.17976E-06	0	2.71704E-06	0	0	0	0	4.53111E-07	0	0	3.65442E-06
PWY-7391: isoprene biosynthesis II (engineered)	0	0	0	0	1.32411E-06	4.81262E-06	0	0	0	1.57084E-06	0	1.12601E-06
PWY-7392: taxadiene biosynthesis (engineered)	0	0	9.99208E-06	0.002807	6.8964E-06	4.82449E-05	1.16075E-06	8.66551E-05	6.49198E-06	1.24016E-05	0	5.39389E-06
PWY-7399: methylphosphonate degradation II	0	0	0	4.13132E-07	1.36739E-06	0	0	0	0	0	0	0
PWY-7400: L-arginine biosynthesis IV (archaebacteria)	0.000251469	0.000247922	0.000253271	0.000229881	0.00048983	0.000324232	0.000285122	0.000296772	0.000217647	0.000137471	9.99855E-05	0.000135089
PWY-7409: phospholipid remodeling (phosphatidylethanolamine, yeast)	0	1.51899E-06	3.57374E-06	6.28126E-07	4.5464E-07	2.09119E-05	0	1.15314E-05	0	0	1.10905E-06	2.34154E-06
PWY-7446: sulfoglycolysis	0	1.2751E-06	1.70197E-07	4.67234E-07	1.46489E-06	0	0	8.26488E-07	0	0	3.31588E-07	1.28151E-06
PWY-7456: mannan degradation	8.72616E-05	5.4122E-06	5.96555E-05	4.36887E-05	9.29114E-05	0.000134192	5.01596E-05	8.5551E-05	0.000114481	8.04168E-05	0	1.48572E-05
PWY-7539: 6-hydroxymethyl-dihydropterin diphosphate biosynthesis III (Chlamydia)	5.96143E-05	8.67642E-05	6.52968E-05	1.28588E-05	1.54712E-06	2.78272E-05	4.05939E-05	4.77167E-05	4.58243E-05	3.3924E-05	0.00011508	4.22537E-05
PWY-7560: methylerythritol phosphate pathway II	5.3438E-05	6.24948E-05	4.64401E-05	5.18047E-05	4.50205E-05	0.000168062	1.88357E-05	0.000227873	3.5362E-05	4.66216E-05	0.03333	8.56947E-05
PWY-7663: gondoate biosynthesis (anaerobic)	0.00034163	0.000428194	0.000331039	0.00015309	1.71535E-05	0.000209988	0.000329016	0.00027775	0.000411669	0.000295635	0.000415715	0.00028623
PWY-7664: oleate biosynthesis IV (anaerobic)	1.15962E-05	4.10286E-06	2.01697E-05	3.51371E-06	1.99139E-06	5.59861E-05	7.56439E-06	3.73766E-05	3.44995E-06	3.19235E-05	6.1331E-07	2.3718E-06
PWY-821: superpathway of sulfur amino acid biosynthesis (Saccharomyces cerevisiae)	1.26042E-05	3.67209E-06	1.48794E-05	9.38286E-06	4.29662E-06	1.77896E-05	2.42121E-06	8.02757E-05	2.67509E-06	1.32145E-05	1.19696E-06	6.25256E-06
PWY-841: superpathway of purine nucleotides de novo biosynthesis I	0.000266643	0.00025764	0.000212438	0.000191179	3.64693E-05	0.000218813	0.000271537	0.000270885	0.000257499	0.000228813	0.000183293	0.000208788
PWY-922: mevalonate pathway I	0	5.60463E-06	0	9.54645E-07	1.8168E-06	0.008076	0	8.43165E-06	2.48359E-07	2.36853E-06	3.05967E-07	4.00618E-06
PWY0-1061: superpathway of L-alanine biosynthesis	8.52988E-06	3.81778E-05	2.80605E-05	2.30309E-05	3.23193E-05	8.77813E-05	3.55416E-05	5.20879E-05	4.09554E-06	9.84643E-06	2.61903E-05	3.40563E-05
PWY0-1241: ADP-L-glycero-&beta;-D-manno-heptose biosynthesis	0	1.02028E-06	4.70075E-06	2.66775E-07	1.35551E-06	1.90487E-05	2.50636E-07	1.60105E-05	4.0922E-07	1.83733E-06	6.06584E-07	1.16539E-06
PWY0-1261: anhydromuropeptides recycling	2.7443E-05	1.18625E-05	8.24775E-05	2.73365E-05	3.17718E-05	8.40567E-05	4.66062E-05	8.39188E-05	4.43239E-05	6.03256E-05	5.58318E-06	9.18976E-06
PWY0-1277: 3-phenylpropanoate and 3-(3-hydroxyphenyl)propanoate degradation	0	1.07227E-06	6.57122E-06	5.07415E-07	1.5403E-06	4.15273E-07	0	1.01125E-05	0	0	0	7.93272E-07
PWY0-1296: purine ribonucleosides degradation	0.000471748	0.000398286	0.000327666	0.000597873	0.000696498	0.000345827	0.000585537	0.000302497	0.000302851	0.000353983	0.000367999	0.000355824
PWY0-1297: superpathway of purine deoxyribonucleosides degradation	7.96719E-05	9.80599E-05	3.8906E-05	3.2987E-05	0.00010543	0.00013309	5.20233E-05	0.000140696	1.62719E-05	3.5253E-05	5.34337E-05	4.27283E-05
PWY0-1298: superpathway of pyrimidine deoxyribonucleosides degradation	3.75002E-05	1.73193E-05	5.44061E-05	7.71876E-05	0.000104532	3.47624E-05	4.75654E-05	2.33423E-05	2.04371E-05	2.00684E-05	8.63482E-06	2.19402E-05
PWY0-1319: CDP-diacylglycerol biosynthesis II	0.00059948	0.000611319	0.000517222	0.00055942	0.00065048	0.000415595	0.000645009	0.000429412	0.000560389	0.000431227	0.000543724	0.000521752
PWY0-1338: polymyxin resistance	0	3.59034E-07	2.5069E-06	2.2391E-07	9.18936E-07	5.49636E-06	2.85503E-07	6.11356E-06	0	8.1914E-08	1.7229E-07	9.03235E-07
PWY0-1415: superpathway of heme biosynthesis from uroporphyrinogen-III	0	3.37511E-06	6.55097E-06	4.96483E-07	0	2.52523E-05	1.99484E-06	1.80242E-05	6.19334E-07	5.32611E-07	5.35502E-07	2.45399E-06
PWY0-1479: tRNA processing	1.52511E-05	0	0	0	0	6.24495E-06	1.86848E-05	3.25944E-05	0	2.54236E-06	0	0
PWY0-1533: methylphosphonate degradation I	0	1.72529E-06	3.16785E-06	4.20777E-07	1.36431E-06	1.4715E-05	4.0061E-07	7.85104E-06	1.30292E-07	0	3.40548E-07	1.19763E-06
PWY0-1586: peptidoglycan maturation (meso-diaminopimelate containing)	0.000192828	0.000264722	0.000178751	0.000118754	0.000166359	0.000139022	8.7956E-05	0.000236254	0.000226638	0.000120403	7.08357E-05	6.27852E-05
PWY0-162: superpathway of pyrimidine ribonucleotides de novo biosynthesis	0.000400559	0.000175588	0.000182626	0.000219369	3.86269E-05	0.00017948	0.000189699	0.000251233	0.000133131	0.000141017	8.7544E-05	0.000116516
PWY0-166: superpathway of pyrimidine deoxyribonucleotides de novo biosynthesis (E. coli)	0.00026636	0.00025481	0.000182776	0.000186541	3.19108E-05	0.000188641	0.000237645	0.000230559	0.000230849	0.000229983	0.000246718	0.000208201
PWY0-321: phenylacetate degradation I (aerobic)	0	0	1.23849E-06	0	1.6358E-06	0	0	5.06964E-06	0	0	0	6.00362E-07
PWY0-41: allantoin degradation IV (anaerobic)	0	4.23739E-07	8.95325E-07	7.15296E-07	1.16112E-06	6.14162E-06	2.39439E-07	6.1201E-06	0	9.4866E-08	2.46861E-07	5.56959E-07
PWY0-42: 2-methylcitrate cycle I	0	0	6.6936E-07	0	0	8.62334E-07	0	4.31277E-06	0	0	0	1.13994E-07
PWY0-781: aspartate superpathway	6.91531E-05	7.78034E-06	0.000134362	4.10438E-05	5.18318E-05	0.000125779	5.58407E-05	0.00011922	6.10405E-05	9.54071E-05	6.77028E-06	3.74914E-05
PWY0-845: superpathway of pyridoxal 5'-phosphate biosynthesis and salvage	8.97761E-05	0.000252088	0.000211737	7.31976E-05	2.68594E-06	0.000149633	0.000167139	0.00021562	0.00027472	0.000193193	0.000215269	0.000239609
PWY0-862: (5Z)-dodec-5-enoate biosynthesis	9.98982E-06	3.52086E-06	1.7439E-05	9.75223E-06	4.06234E-06	4.99041E-05	6.50542E-06	3.27377E-05	2.96049E-06	2.77953E-05	3.80016E-06	2.03553E-06
PWY1F-823: leucopelargonidin and leucocyanidin biosynthesis	0	5.26374E-07	0	0	0	1.62916E-07	0	8.73266E-08	0	0	8.01181E-08	0
PWY1G-0: mycothiol biosynthesis	0	0	0	0	0	0	0	2.71454E-07	0	0	0	0
PWY490-3: nitrate reduction VI (assimilatory)	1.17144E-05	1.76282E-06	2.09133E-05	2.26224E-05	1.56833E-06	0.004507	7.45616E-06	2.81789E-06	4.85001E-06	5.62951E-06	0	1.36606E-05
PWY4FS-7: phosphatidylglycerol biosynthesis I (plastidic)	7.39342E-05	0.000126438	0.000124892	2.49188E-05	7.01865E-06	0.00014515	7.2952E-05	0.000150652	8.09811E-05	5.77515E-05	0.0001898	8.35329E-05
PWY4FS-8: phosphatidylglycerol biosynthesis II (non-plastidic)	7.39342E-05	0.000126397	0.000124885	2.49187E-05	7.01865E-06	0.000145145	7.2952E-05	0.000150652	8.09811E-05	5.77515E-05	0.0001898	8.35329E-05
PWY4LZ-257: superpathway of fermentation (Chlamydomonas reinhardtii)	1.61176E-05	1.00361E-05	2.72238E-05	1.49643E-05	1.97374E-05	4.33794E-05	3.39734E-05	3.44311E-05	8.4305E-06	2.61581E-05	7.25229E-06	1.51338E-05
PWY66-367: ketogenesis	0	0	0	0	0	0	0	1.12467E-06	0	0	0	0
PWY66-389: phytol degradation	0	0	0	4.59061E-06	0	2.85913E-06	0	2.60936E-06	0	0	0	0
PWY66-398: TCA cycle III (animals)	5.76605E-07	1.90951E-06	4.84373E-07	3.65939E-06	0	1.00685E-05	7.82575E-06	2.3933E-05	2.26728E-06	6.15867E-06	0	5.86148E-06
PWY66-399: gluconeogenesis III	4.43948E-05	3.96419E-05	0.000105341	4.58852E-05	1.87062E-05	0.000150281	8.01332E-05	0.000154775	9.79545E-05	8.97055E-05	4.11996E-06	6.43925E-05
PWY66-400: glycolysis VI (metazoan)	0.000283501	3.22339E-05	0.00014034	3.75895E-05	1.5704E-05	0.000195786	9.08363E-05	0.000265007	8.82994E-05	9.57294E-05	4.15883E-05	6.39374E-05
PWY66-409: superpathway of purine nucleotide salvage	0.000169475	0.000202089	9.00862E-05	7.73699E-05	3.80345E-05	0.000194788	6.99561E-05	0.000222404	4.41558E-05	4.82199E-05	0.000121158	9.94508E-05
PWY66-422: D-galactose degradation V (Leloir pathway)	0.000437847	0.00035966	0.000299775	0.000493406	0.000606006	0.000259378	0.000444361	0.00022701	0.000268219	0.000185655	0.00020292	0.000277639
PWYG-321: mycolate biosynthesis	0.01204	4.26164E-06	2.08625E-05	3.65493E-06	1.75692E-06	5.7932E-05	7.85598E-06	3.8454E-05	3.58291E-06	3.30251E-05	4.94932E-07	2.46178E-06
PYRIDNUCSAL-PWY: NAD salvage pathway I	9.76502E-06	7.68932E-06	2.23959E-05	3.3597E-05	2.1866E-05	8.33949E-05	0	6.09659E-05	3.8221E-05	3.83793E-05	1.75917E-05	3.89608E-05
PYRIDNUCSYN-PWY: NAD biosynthesis I (from aspartate)	0.000299134	0.000196296	0.000124639	0.000235141	0.000227691	0.000177322	0.000192891	0.000250105	0.000157177	0.000174726	0.000103119	0.000103379
PYRIDOXSYN-PWY: pyridoxal 5'-phosphate biosynthesis I	6.99044E-05	0.000216872	0.000185548	5.6603E-05	3.64558E-06	0.0001208	0.00013504	0.000193936	0.000275945	0.000172061	0.000204467	0.000220749
REDCITCYC: TCA cycle VIII (helicobacter)	0	3.55867E-06	1.51467E-05	1.71892E-05	3.39215E-06	3.30586E-05	1.06243E-06	2.29938E-05	4.22402E-07	5.55033E-06	1.19362E-06	2.77625E-06
RHAMCAT-PWY: L-rhamnose degradation I	0.000185077	0.000162087	0.000142607	9.98641E-05	0.000409258	0.000132911	0.000116809	9.39569E-05	9.04077E-05	0.000122125	0.000235396	0.000182285
RIBOSYN2-PWY: flavin biosynthesis I (bacteria and plants)	3.47856E-05	2.2508E-05	6.49887E-05	5.61216E-05	7.41443E-06	0.000153491	1.51741E-05	0.000176546	8.22991E-05	0.000120446	0.000200985	0.00010017
RUMP-PWY: formaldehyde oxidation I	0	0	1.62423E-06	0	1.47035E-06	0	4.3155E-07	0	0	0	0	0
SALVADEHYPOX-PWY: adenosine nucleotides degradation II	0.000121869	0.000157286	7.60744E-05	0.000188551	0.000227081	0.000162663	0.000141141	0.000154738	0.000111882	0.000110185	9.42083E-05	4.05247E-05
SER-GLYSYN-PWY: superpathway of L-serine and glycine biosynthesis I	0.000273374	0.000256534	0.000227811	0.000263491	0.0004196	0.000193793	0.000212613	0.000212246	0.000194821	0.000155299	5.62248E-05	0.000158573
SO4ASSIM-PWY: sulfate reduction I (assimilatory)	2.00197E-05	5.79462E-06	2.55472E-05	4.81374E-05	1.01542E-05	5.18692E-05	6.67314E-05	0.000111985	4.34409E-06	2.19299E-05	1.48012E-05	7.74794E-06
SULFATE-CYS-PWY: superpathway of sulfate assimilation and cysteine biosynthesis	3.91945E-05	1.25028E-05	0.04459	7.90028E-05	2.18064E-05	8.47333E-05	0.000107136	0.000144623	9.15706E-06	3.88567E-05	2.5385E-05	1.57754E-05
TCA-GLYOX-BYPASS: superpathway of glyoxylate bypass and TCA	0	2.33748E-06	9.93711E-06	2.82558E-06	4.02794E-06	4.56565E-05	9.64608E-07	2.99809E-05	7.68283E-07	2.18072E-07	1.18395E-06	1.94901E-06
TCA: TCA cycle I (prokaryotic)	0.000136366	6.78011E-05	6.22521E-05	3.93876E-05	1.16844E-05	0.000111101	6.2712E-05	0.000113483	7.45659E-05	7.32531E-05	1.04188E-05	2.4023E-05
TEICHOICACID-PWY: teichoic acid (poly-glycerol) biosynthesis	0	0	0	5.79567E-07	8.80555E-07	7.97854E-07	3.15211E-07	6.17002E-07	0	1.59062E-07	0	0
THISYN-PWY: superpathway of thiamin diphosphate biosynthesis I	0.000194491	5.86406E-05	0.000187076	0.000190722	0.000149581	0.00018911	0.00022896	0.000142359	0.000127953	0.000144602	0.000195391	0.000214468
THISYNARA-PWY: superpathway of thiamin diphosphate biosynthesis III (eukaryotes)	0.000231454	0.000223719	0.000169393	0.000140794	0.000388844	0.000139948	0.000153654	0.000122589	0.000134572	9.1223E-05	0.000179333	0.000176394
THREOCAT-PWY: superpathway of L-threonine metabolism	0	0	0	0	0	0	0	0	0	0	0	1.88577E-06
THRESYN-PWY: superpathway of L-threonine biosynthesis	0.000308722	0.000180801	0.000304506	0.000213647	0.000393797	0.000243311	0.000315075	0.000261046	0.000218918	0.000238505	0.000184924	0.000205357
TRNA-CHARGING-PWY: tRNA charging	0.00032481	0.000276795	0.000281324	0.000437727	0.000486975	0.000346159	0.000541725	0.00044021	0.000358741	0.000433774	0.000245251	0.0003084
TRPSYN-PWY: L-tryptophan biosynthesis	0.000321079	0.000502091	0.000144235	0.000292578	0.000336526	0.00020324	0.000271761	0.00022044	0.000171562	0.000151547	8.38577E-05	0.000120601
UBISYN-PWY: superpathway of ubiquinol-8 biosynthesis (prokaryotic)	0	3.61332E-07	3.24149E-06	4.55575E-07	1.47828E-06	1.62716E-05	4.80089E-07	1.11397E-05	2.43067E-07	0	0	5.37171E-07
UDPNAGSYN-PWY: UDP-N-acetyl-D-glucosamine biosynthesis I	3.14808E-05	3.05074E-05	8.67208E-05	5.45721E-05	0.000173309	7.13622E-05	6.92101E-05	6.18341E-05	3.20414E-05	3.33318E-05	8.84128E-06	2.96296E-05
UNINTEGRATED	0.584601	0.651033	0.580434	0.560213	0.527507	0.530554	0.470695	0.470968	0.583078	0.533417	0.655231	0.602159
UNMAPPED	0.369688	0.305807	0.380227	0.399669	0.425757	0.427896	0.484025	0.485626	0.380594	0.432348	0.312437	0.364297
URDEGR-PWY: superpathway of allantoin degradation in plants	0	3.37012E-07	7.09674E-07	3.57766E-07	1.35946E-06	6.63406E-06	2.20542E-07	5.7491E-06	0	1.81872E-07	1.88632E-07	8.97943E-07
VALSYN-PWY: L-valine biosynthesis	0.000632012	0.000751991	0.000593977	0.000650724	0.000759642	0.000488159	0.000726542	0.000509716	0.00052042	0.000434533	0.000452275	0.000504028

## Sheet: Unstratified data Palleja 2016
Table S3d: Metagenomic unstratified relative abundance resulting for the data generated from Palleja et al., 2016.
# Pathway	GB1.12	GB1.0	GB2.12	GB2.0	GB3.12	GB3.0	GB.12	GB4.0	GB5.12	GB5.0	GB6.12	GB6.0	GB7.12	GB7.0
1CMET2-PWY: N10-formyl-tetrahydrofolate biosynthesis	0.000223618	0.000374982	0.000335264	0.000483612	0.000263965	0.000277534	0.000243466	0.000174134	0.000217014	0.000304308	0.000321296	0.000385231	0.000216768	0.000483045
3-HYDROXYPHENYLACETATE-DEGRADATION-PWY: 4-hydroxyphenylacetate degradation	0	0	8.00728E-07	0	1.13499E-05	0	0	0	4.35694E-05	0	4.82269E-05	0	0	0
AEROBACTINSYN-PWY: aerobactin biosynthesis	2.03678E-07	1.98115E-07	0	0	0	0	0	0	0	0	0	0	1.90688E-05	0
ALL-CHORISMATE-PWY: superpathway of chorismate metabolism	4.8262E-06	0	0	0	0	0	3.56946E-06	0	4.11449E-05	0	1.82375E-05	0	3.08899E-05	0
ALLANTOINDEG-PWY: superpathway of allantoin degradation in yeast	2.68832E-07	0	4.79906E-06	0	1.53172E-06	0	3.81669E-06	0	4.47105E-06	0	2.1635E-06	0	1.15873E-06	0
ANAEROFRUCAT-PWY: homolactic fermentation	0.000262525	0.000134317	0.000220294	0.000367932	0.000165713	0.000187191	0.000312954	0.000298981	0.000255946	0.000302569	0.00022755	0.000143813	0.000298047	0.000242379
ANAGLYCOLYSIS-PWY: glycolysis III (from glucose)	0.000324519	0.000384812	0.000302635	0.000626812	0.000309325	0.000290685	0.000368332	0.000333584	0.000323828	0.000523624	0.000298133	0.000273991	0.000341408	0.000390847
ARG+POLYAMINE-SYN: superpathway of arginine and polyamine biosynthesis	0.000102428	6.62213E-05	0.000111313	3.30484E-05	0.000115881	9.20795E-05	0.000122259	7.87898E-05	5.99358E-05	0.00013353	0.000206624	9.18209E-05	7.51812E-05	4.0845E-05
ARGDEG-PWY: superpathway of L-arginine, putrescine, and 4-aminobutanoate degradation	2.35971E-06	0	2.45497E-05	0	1.01668E-05	0	3.53594E-06	0	3.46284E-05	0	0.05254	0	0	0
ARGININE-SYN4-PWY: L-ornithine de novo biosynthesis	0.000145982	0.000114313	0.000130635	0.000431264	0.000106518	0.07582	7.37747E-05	0.000118517	3.67587E-05	8.87081E-05	2.48083E-05	7.98061E-05	0.000142472	0.000331139
ARGORNPROST-PWY: arginine, ornithine and proline interconversion	2.91242E-05	2.45987E-06	1.06831E-05	7.61431E-07	7.92784E-06	0	3.27434E-06	0	8.93898E-06	2.90293E-07	1.6961E-06	0	5.40225E-06	0
ARGSYN-PWY: L-arginine biosynthesis I (via L-ornithine)	0.000280152	0.000160692	0.000284326	0.000107183	0.000241182	8.91545E-05	0.000279386	0.00017712	0.000308859	0.000238112	0.00032318	0.000121825	0.000242398	4.25812E-05
ARGSYNBSUB-PWY: L-arginine biosynthesis II (acetyl cycle)	9.58853E-05	4.05405E-05	0.000215269	4.85755E-05	0.000125348	1.43636E-05	0.000109526	6.18042E-05	0.000221754	8.52318E-05	0.000264093	2.42987E-05	0.000159978	4.94132E-06
ARO-PWY: chorismate biosynthesis I	0.000629275	0.000621487	0.000372098	0.000517536	0.000504961	0.000546894	0.000572184	0.000486116	0.000354362	0.000541207	0.000394854	0.000530706	0.000475973	0.000464139
ASPASN-PWY: superpathway of L-aspartate and L-asparagine biosynthesis	0.000195067	8.53635E-05	0.0001909	0.000171816	0.000133918	0.000101548	0.000149939	0.000151733	0.000150679	0.000169925	0.000205476	9.50351E-05	0.000215706	0.000165217
AST-PWY: L-arginine degradation II (AST pathway)	2.5038E-06	5.37724E-07	1.6256E-05	0	5.94916E-06	0	2.57576E-06	0	2.88028E-05	0	3.71701E-05	0	1.60581E-05	0
BIOTIN-BIOSYNTHESIS-PWY: biotin biosynthesis I	3.99874E-05	2.14921E-05	9.52382E-05	1.72515E-05	7.36984E-05	1.24115E-05	4.3221E-05	1.34229E-05	8.5782E-05	4.37164E-06	0.000137864	1.06329E-05	0.000106098	8.24599E-06
BRANCHED-CHAIN-AA-SYN-PWY: superpathway of branched amino acid biosynthesis	0.000426091	0.000511248	0.000290284	0.000504435	0.00032225	0.000295557	0.000403419	0.000381372	0.000252771	0.000480836	0.000289593	0.000296215	0.000317361	0.000323463
CALVIN-PWY: Calvin-Benson-Bassham cycle	0.000489343	0.000472169	0.000293847	0.000585492	0.000375711	0.000254069	0.000502879	0.000510546	0.000391858	0.000502644	0.00031954	0.000327917	0.000367413	0.000420373
CATECHOL-ORTHO-CLEAVAGE-PWY: catechol degradation to &beta;-ketoadipate	0	4.54259E-07	0	0	3.73491E-07	0	0	0	0	0	2.77405E-06	0	0	0
CENTFERM-PWY: pyruvate fermentation to butanoate	6.24991E-05	3.5478E-05	1.20205E-05	8.65453E-06	4.35283E-05	4.04837E-05	3.2099E-05	1.18805E-05	3.22087E-05	2.35971E-05	1.08982E-06	2.63522E-05	7.22518E-06	1.71319E-05
CITRULBIO-PWY: L-citrulline biosynthesis	1.40834E-05	2.78599E-05	3.8142E-05	4.18436E-05	2.18401E-05	2.60057E-05	1.27836E-05	6.0005E-06	1.6493E-05	5.55351E-05	2.12961E-05	3.9612E-05	2.21929E-05	3.97347E-05
COA-PWY-1: coenzyme A biosynthesis II (mammalian)	0.000611167	0.000805749	0.000435507	0.00046261	0.000533714	0.000544703	0.000613749	0.00062032	0.000390992	0.00057355	0.000404427	0.000630689	0.000423957	0.000619275
COA-PWY: coenzyme A biosynthesis I	0.000232377	0.000231201	0.000194072	0.000290715	0.000179621	0.000157468	0.000190773	0.000117908	0.000121065	0.000179083	0.000203107	7.66597E-05	0.000212428	0.000187974
COBALSYN-PWY: adenosylcobalamin salvage from cobinamide I	0.000117372	6.50741E-05	0.000134099	0.000104103	0.000107215	8.89594E-05	0.000101377	5.17367E-05	8.42729E-05	0.000127558	0.000141824	9.06817E-05	5.80177E-05	0.000134968
COLANSYN-PWY: colanic acid building blocks biosynthesis	4.22455E-05	1.66271E-05	8.96087E-05	9.46252E-05	9.87935E-05	0.000107858	9.71252E-05	5.60298E-05	7.55658E-05	4.92143E-05	9.99741E-05	2.60405E-05	7.39387E-05	4.46903E-05
COMPLETE-ARO-PWY: superpathway of aromatic amino acid biosynthesis	0.000601155	0.000572482	0.000370402	0.000536556	0.000481148	0.000580211	0.000534199	0.000455845	0.000312373	0.000486481	0.000401968	0.000549931	0.00047427	0.000463513
CRNFORCAT-PWY: creatinine degradation I	2.40176E-05	6.1718E-05	2.42182E-06	0	1.71315E-05	6.88912E-06	3.92569E-05	3.69704E-06	1.28026E-05	5.95255E-06	0	1.20902E-05	2.13849E-06	1.14687E-05
DAPLYSINESYN-PWY: L-lysine biosynthesis I	7.59345E-05	2.75306E-05	0.00010044	5.30666E-05	6.23956E-05	1.25245E-05	6.25191E-05	3.36026E-05	0.000149189	0.000111453	0.000158475	3.38781E-05	0.000268529	1.67603E-05
DENOVOPURINE2-PWY: superpathway of purine nucleotides de novo biosynthesis II	0.000353662	0.000383265	0.000231188	0.00042244	0.0002615	0.00025886	0.000361973	0.000390681	0.000258162	0.000274625	0.000287378	0.000188796	0.000315422	0.000227638
DTDPRHAMSYN-PWY: dTDP-L-rhamnose biosynthesis I	0.0004419	0.000280675	0.000205527	0.000670753	0.000332109	0.000475263	0.000406698	0.000341842	0.000156372	0.000385624	6.79933E-05	0.000427118	0.000333355	0.00039466
ECASYN-PWY: enterobacterial common antigen biosynthesis	5.37962E-06	7.28762E-07	2.22154E-05	0	8.0492E-06	0	2.27562E-06	0	3.53324E-05	0	5.0867E-05	0	1.73107E-05	0
ENTBACSYN-PWY: enterobactin biosynthesis	2.95447E-05	4.03915E-06	6.77784E-05	0	3.92026E-05	0	2.38253E-05	0	0.00010259	0	0.000141141	0	5.77172E-05	0
FAO-PWY: fatty acid &beta;-oxidation I	3.80807E-05	8.11783E-06	3.23925E-05	4.44042E-07	2.9556E-05	1.25427E-06	3.72285E-05	1.36301E-05	5.65577E-05	1.19916E-05	3.27474E-05	4.54131E-07	2.87282E-05	2.11871E-06
FASYN-ELONG-PWY: fatty acid elongation -- saturated	4.29089E-05	1.94825E-05	9.67297E-05	1.51755E-05	7.69258E-05	0.01094	4.56621E-05	1.30618E-05	9.05255E-05	4.4128E-06	0.00014375	1.02162E-05	0.000134315	7.30541E-06
FASYN-INITIAL-PWY: superpathway of fatty acid biosynthesis initiation (E. coli)	2.82864E-05	1.25611E-05	7.22264E-05	9.52972E-06	5.37314E-05	6.85144E-06	3.06217E-05	8.25325E-06	7.13942E-05	2.77798E-06	0.000129397	6.47006E-06	9.97163E-05	4.59359E-06
FERMENTATION-PWY: mixed acid fermentation	3.53969E-05	1.02669E-05	6.90193E-05	0	0.000134362	2.40587E-06	3.57131E-05	3.34882E-06	9.25672E-05	2.32257E-05	0.00012526	1.94415E-07	1.70232E-05	3.57635E-05
FOLSYN-PWY: superpathway of tetrahydrofolate biosynthesis and salvage	4.18756E-05	3.19096E-05	7.06788E-05	2.51285E-05	3.66495E-05	1.24254E-05	7.34208E-06	2.97825E-05	8.64699E-05	5.27208E-05	0.000127125	2.48192E-05	5.55825E-05	1.62633E-05
FUC-RHAMCAT-PWY: superpathway of fucose and rhamnose degradation	2.71751E-05	1.52585E-05	7.7983E-05	8.09676E-06	3.75562E-05	0	3.40126E-05	0	8.12617E-05	0	0.000105023	2.82001E-06	5.73027E-05	4.76535E-06
FUCCAT-PWY: fucose degradation	1.67145E-05	4.76211E-05	4.83019E-05	3.6863E-06	2.54579E-05	2.78449E-06	2.11171E-05	2.90345E-06	6.98641E-05	9.26703E-05	8.55336E-05	1.09325E-05	4.48171E-05	2.1673E-06
GALACT-GLUCUROCAT-PWY: superpathway of hexuronide and hexuronate degradation	0.000164691	8.48601E-05	8.20969E-05	0.000162276	0.000117034	7.14648E-05	0.000112305	8.92387E-05	9.95882E-05	0.000142328	0.000100795	0.000110385	0.000123844	0.000124757
GALACTARDEG-PWY: D-galactarate degradation I	7.11842E-06	1.66855E-06	2.36442E-05	5.78632E-07	1.46565E-05	0	2.46835E-06	0	3.54231E-05	0	5.24241E-05	0	7.36578E-06	0
GALACTUROCAT-PWY: D-galacturonate degradation I	0.000145968	9.35589E-05	8.54189E-05	0.000144226	0.000109664	7.13563E-05	0.00010191	7.06431E-05	9.98691E-05	0.000132473	9.00775E-05	9.17123E-05	0.000105372	0.000147225
GLCMANNANAUT-PWY: superpathway of N-acetylglucosamine, N-acetylmannosamine and N-acetylneuraminate degradation	0.000156149	0.000124609	9.90691E-05	0.000100383	0.000136507	8.48671E-05	0.000123143	0.000104664	0.000110153	0.000115791	0.000155544	0.000166114	0.000102621	0.000161688
GLUCARDEG-PWY: D-glucarate degradation I	7.40691E-06	1.57298E-06	2.58286E-05	5.37282E-07	1.10632E-05	0	4.57874E-06	0	3.74139E-05	0	5.66584E-05	0	7.96705E-06	0
GLUCARGALACTSUPER-PWY: superpathway of D-glucarate and D-galactarate degradation	7.11842E-06	1.66855E-06	2.36442E-05	5.78632E-07	1.46565E-05	0	2.46835E-06	0	3.54231E-05	0	5.24241E-05	0	7.36578E-06	0
GLUCONEO-PWY: gluconeogenesis I	0.000129619	7.74085E-05	0.000132405	6.47385E-05	0.000107504	3.44111E-05	0.000152924	0.000224534	0.000188937	0.000173671	0.000130821	5.49048E-05	0.000193892	4.22142E-05
GLUCOSE1PMETAB-PWY: glucose and glucose-1-phosphate degradation	3.45182E-05	3.96242E-06	6.08043E-05	2.11781E-07	2.80672E-05	0	2.66245E-05	0	7.40423E-05	1.19746E-07	8.61699E-05	6.83611E-08	0.000118621	0
GLUCUROCAT-PWY: superpathway of &beta;-D-glucuronide and D-glucuronate degradation	0.000178151	8.22817E-05	6.95061E-05	0.000127508	0.000115377	6.20898E-05	0.000150552	9.61734E-05	9.65425E-05	0.00014614	9.49566E-05	0.000112402	0.000129916	0.00011158
GLUDEG-I-PWY: GABA shunt	9.44583E-06	7.49561E-07	5.6514E-05	1.15751E-07	2.41005E-05	2.11915E-07	3.01357E-05	9.00057E-06	3.20075E-05	6.41465E-05	2.30595E-05	1.97341E-06	4.29308E-05	3.02227E-06
GLUTORN-PWY: L-ornithine biosynthesis	8.80449E-05	3.94693E-05	0.000162368	2.92778E-05	7.72229E-05	2.36741E-05	8.44338E-05	4.9371E-05	0.000149421	7.10197E-05	0.000215486	3.21325E-05	0.000110459	9.67395E-06
GLYCOCAT-PWY: glycogen degradation I (bacterial)	1.11403E-05	1.89148E-05	4.76574E-05	0	2.9024E-05	8.01937E-06	4.14476E-05	5.9808E-05	7.16012E-05	6.03974E-06	9.12254E-05	7.99088E-05	6.39808E-05	0
GLYCOGENSYNTH-PWY: glycogen biosynthesis I (from ADP-D-Glucose)	0.000276509	0.000211891	0.000174705	0.000183652	0.00018407	0.000110028	0.000308414	0.000199112	0.000157255	0.000244749	0.000129379	0.00011886	0.000175492	0.000162182
GLYCOL-GLYOXDEG-PWY: superpathway of glycol metabolism and degradation	6.29625E-06	3.90298E-07	3.82869E-05	5.51074E-07	6.46482E-06	0	1.55954E-06	0	2.32372E-05	0	4.7288E-05	0	3.36966E-05	0
GLYCOLYSIS-E-D: superpathway of glycolysis and Entner-Doudoroff	7.38718E-05	3.24894E-05	6.9036E-05	3.21153E-05	6.52066E-05	2.06559E-05	7.58432E-05	1.93775E-05	9.13519E-05	6.73429E-05	0.000144984	2.86694E-05	0.000108141	2.21595E-05
GLYCOLYSIS-TCA-GLYOX-BYPASS: superpathway of glycolysis, pyruvate dehydrogenase, TCA, and glyoxylate bypass	4.54082E-05	1.11724E-05	7.11203E-05	7.5063E-07	4.98862E-05	0	2.03837E-05	0	0.000103725	7.13972E-07	0.000157062	0	9.83085E-05	0
GLYCOLYSIS: glycolysis I (from glucose 6-phosphate)	0.000226762	6.30233E-05	0.000174917	0.00039221	9.73433E-05	0.000195544	0.0003072	0.000333215	0.000274396	0.000214772	0.00025697	8.33008E-05	0.000364731	0.000162005
GLYOXYLATE-BYPASS: glyoxylate cycle	1.93659E-05	4.52725E-06	4.75889E-05	5.30759E-07	3.59287E-05	0	1.82629E-05	0	6.22632E-05	1.84754E-07	0.00010047	0	4.26171E-05	0
GOLPDLCAT-PWY: superpathway of glycerol degradation to 1,3-propanediol	1.56311E-05	1.64187E-05	4.22732E-05	6.35678E-06	1.20209E-05	3.54035E-06	7.59658E-06	1.40207E-05	1.40143E-05	1.30676E-05	6.04035E-05	3.84708E-05	2.66872E-06	7.50121E-06
HCAMHPDEG-PWY: 3-phenylpropanoate and 3-(3-hydroxyphenyl)propanoate degradation to 2-oxopent-4-enoate	3.52792E-06	3.02989E-07	3.99795E-05	0	6.47869E-06	0	9.91613E-06	0	1.93412E-05	0	3.76612E-05	0	1.85066E-07	0
HEME-BIOSYNTHESIS-II: heme biosynthesis I (aerobic)	6.96644E-06	6.36161E-06	3.08326E-05	9.04478E-07	1.68811E-05	1.07696E-05	1.30256E-05	4.08881E-07	6.47134E-06	7.94405E-06	7.17008E-05	9.81954E-06	2.18966E-05	1.47556E-05
HEMESYN2-PWY: heme biosynthesis II (anaerobic)	2.49421E-05	7.14269E-06	8.3961E-05	1.08752E-05	2.28453E-05	1.77637E-05	1.16197E-05	4.0977E-07	2.90898E-05	9.80869E-06	0.000104184	1.87095E-05	3.19953E-05	3.2568E-05
HEXITOLDEGSUPER-PWY: superpathway of hexitol degradation (bacteria)	9.04994E-05	5.36186E-05	7.73893E-05	6.0711E-05	7.4622E-05	8.89915E-06	9.66418E-05	2.16009E-05	0.000129512	9.17185E-05	0.000195499	6.65114E-05	0.000117713	4.74272E-05
HISDEG-PWY: L-histidine degradation I	0.000136473	6.76902E-05	9.14678E-05	0.000545877	0.000120227	9.52105E-05	0.000169913	0.000145929	0.000152654	7.38856E-05	3.97349E-05	2.47152E-05	0.000116667	2.46354E-05
HISTSYN-PWY: L-histidine biosynthesis	0.000154922	0.000572449	0.00021881	0.000126236	0.000213204	0.000117285	0.000189745	0.000140168	8.8474E-05	0.000240501	0.000227013	0.00013005	0.000120644	0.000170178
HOMOSER-METSYN-PWY: L-methionine biosynthesis I	0.000107287	0.000156916	6.66959E-05	2.77262E-05	0.000124592	6.74067E-05	0.000151294	0.000114428	9.39286E-05	0.000123268	0.000167648	5.55214E-05	6.18476E-05	9.49073E-05
HSERMETANA-PWY: L-methionine biosynthesis III	0.000105449	0.000148018	5.5288E-05	7.06033E-05	0.000115932	5.8835E-05	0.000148566	0.000125128	9.28835E-05	0.000131954	9.83302E-05	5.22762E-05	6.38598E-05	8.88775E-05
ILEUSYN-PWY: L-isoleucine biosynthesis I (from threonine)	0.000582527	0.000923782	0.000419267	0.000641166	0.000537434	0.000474339	0.000574662	0.000544468	0.000427124	0.000656932	0.000428572	0.000540875	0.000463373	0.000562385
KDO-NAGLIPASYN-PWY: superpathway of (Kdo)2-lipid A biosynthesis	4.35989E-06	7.32973E-07	1.78508E-05	0	8.75758E-06	0	1.50446E-06	0	3.09876E-05	0	4.5878E-05	0	2.79688E-05	0
KETOGLUCONMET-PWY: ketogluconate metabolism	1.15898E-05	1.49288E-06	3.26561E-05	5.21019E-07	1.87805E-05	0	4.1624E-06	0	0.04591	0	3.85666E-05	0	2.22299E-05	0
LACTOSECAT-PWY: lactose and galactose degradation I	1.14757E-05	1.46531E-05	2.0158E-05	2.92676E-07	4.66142E-05	1.84556E-05	1.52364E-05	4.58241E-06	4.93535E-06	1.65091E-05	6.42248E-05	1.4103E-05	4.96817E-06	1.77649E-06
LPSSYN-PWY: superpathway of lipopolysaccharide biosynthesis	6.72054E-06	0	7.82527E-07	0	1.53581E-05	0	0	0	4.18904E-05	0	4.52526E-05	0	0	0
MET-SAM-PWY: superpathway of S-adenosyl-L-methionine biosynthesis	0.000205595	0.000234041	0.000126589	4.95108E-05	0.000217498	0.00012961	0.000279338	0.000197996	0.0001705	0.000198182	0.000237407	9.62886E-05	0.000108843	0.000165297
METHANOGENESIS-PWY: methanogenesis from H2 and CO2	0	0	0	0	0	0	4.43201E-07	4.87968E-07	2.30078E-06	3.81935E-06	0	0	0	0
METHGLYUT-PWY: superpathway of methylglyoxal degradation	4.52542E-06	2.64199E-07	3.01117E-05	1.07313E-06	7.18436E-06	0	1.09637E-06	0	2.19555E-05	0	2.89113E-05	0	2.74994E-05	3.81555E-06
METSYN-PWY: L-homoserine and L-methionine biosynthesis	0.000185274	0.000258534	0.00011214	5.29341E-05	0.00019918	0.000118075	0.00024876	0.000190332	0.000153652	0.000205294	0.000220617	0.000101135	0.00010714	0.000158605
NAD-BIOSYNTHESIS-II: NAD salvage pathway II	1.64785E-05	4.99802E-06	4.06096E-05	7.15953E-07	1.80976E-05	0	1.99895E-05	6.76857E-06	6.09768E-05	2.19968E-05	0.000102546	0	4.4729E-05	0
NAGLIPASYN-PWY: lipid IVA biosynthesis	2.42439E-05	5.25092E-06	6.08552E-05	1.74445E-05	3.54008E-05	2.11955E-05	4.00999E-05	0	7.39308E-05	9.95361E-06	0.000134066	1.59464E-05	6.52766E-05	3.39597E-05
NONMEVIPP-PWY: methylerythritol phosphate pathway I	0.000720697	0.000816907	0.000401321	0.000827219	0.000553838	0.000904112	0.00071617	0.000704785	0.000409921	0.000567281	0.000305498	0.00078569	0.000554015	0.000527953
NONOXIPENT-PWY: pentose phosphate pathway (non-oxidative branch)	0.000429272	0.000339167	0.000242525	0.000336413	0.000330542	0.000238416	0.000322688	0.000342698	0.000257746	0.000463776	0.000269208	0.000331554	0.000296713	0.000356147
OANTIGEN-PWY: O-antigen building blocks biosynthesis (E. coli)	0.000143473	1.63033E-05	0.000123946	9.06052E-06	7.35282E-05	9.46924E-06	8.46025E-05	1.44166E-05	0.000108233	4.83769E-05	8.83272E-05	3.55761E-05	0.000107404	1.63091E-06
ORNARGDEG-PWY: superpathway of L-arginine and L-ornithine degradation	2.35971E-06	0	2.45497E-05	0	1.01668E-05	0	3.53594E-06	0	3.46284E-05	0	0.05254	0	0	0
ORNDEG-PWY: superpathway of ornithine degradation	5.51654E-06	0	2.27724E-05	0	1.30587E-05	0	1.73933E-05	0	2.32387E-05	0	6.6022E-05	0	0	0
P105-PWY: TCA cycle IV (2-oxoglutarate decarboxylase)	4.02877E-05	9.61095E-06	6.4177E-05	7.05243E-07	4.77131E-05	0	1.81749E-05	0	8.80885E-05	0	0.000131409	0	6.60814E-05	0
P108-PWY: pyruvate fermentation to propanoate I	2.07942E-05	4.59859E-05	2.8019E-05	0	2.61961E-05	0	2.55337E-05	1.11988E-05	7.57999E-05	4.9931E-05	4.41054E-05	1.4565E-07	3.30499E-05	0
P122-PWY: heterolactic fermentation	7.98775E-06	4.34451E-06	1.89833E-05	0	1.26086E-05	0	1.5353E-05	2.66223E-06	6.51678E-05	1.13157E-06	4.36905E-05	1.44689E-06	7.74105E-07	3.05486E-07
P124-PWY: Bifidobacterium shunt	9.25583E-05	7.1657E-05	4.14954E-05	0	0.000124651	0	0.000127085	5.9894E-05	4.47137E-05	7.53155E-05	0	0	1.68551E-05	8.13838E-05
P125-PWY: superpathway of (R,R)-butanediol biosynthesis	0	0	0	0	0	0	0	0	0	2.61004E-07	1.05641E-06	0	0	0
P161-PWY: acetylene degradation	4.04805E-05	2.42215E-05	8.69263E-05	7.12026E-06	3.38216E-05	6.75541E-06	6.25608E-05	2.90794E-05	0.000112876	3.10988E-05	0.000102663	2.14792E-05	8.87393E-06	1.62237E-05
P162-PWY: L-glutamate degradation V (via hydroxyglutarate)	7.95643E-05	6.05703E-05	5.16614E-05	4.12577E-05	7.77853E-05	8.09927E-05	7.81444E-05	7.22262E-05	4.99434E-05	3.11203E-05	5.45283E-05	3.68193E-05	3.35508E-05	2.78389E-05
P163-PWY: L-lysine fermentation to acetate and butanoate	7.22777E-06	0	7.70165E-06	0	0	0	3.8961E-06	0	3.86891E-05	1.21086E-05	4.43493E-07	0	0	0
P164-PWY: purine nucleobases degradation I (anaerobic)	5.52438E-05	5.06841E-05	5.9868E-05	9.42905E-06	5.2209E-05	1.86064E-05	3.82959E-05	0	5.76013E-05	4.69616E-05	8.32229E-05	2.25498E-05	3.41612E-05	1.33347E-05
P185-PWY: formaldehyde assimilation III (dihydroxyacetone cycle)	5.51161E-05	4.55227E-05	5.8572E-05	1.84833E-05	6.56957E-05	2.66434E-05	8.40573E-05	5.09163E-05	3.58408E-05	8.03035E-05	8.81559E-05	3.75218E-05	3.17329E-06	4.17293E-05
P221-PWY: octane oxidation	0	0	0	0	0	0	0	0	0	1.1348E-07	3.63589E-07	0	0	0
P23-PWY: reductive TCA cycle I	9.77601E-06	7.12113E-06	4.79324E-06	0	3.33447E-05	0	0	0	4.15732E-05	4.28378E-07	2.51442E-05	0	6.50426E-06	0
P4-PWY: superpathway of L-lysine, L-threonine and L-methionine biosynthesis I	9.11689E-05	3.98192E-05	9.71669E-05	4.87615E-05	8.06644E-05	1.94329E-05	7.8796E-05	4.51231E-05	0.000129542	0.000122364	0.000171014	4.0924E-05	0.000109757	2.42956E-05
P42-PWY: incomplete reductive TCA cycle	8.4974E-05	7.56988E-05	0.00010457	0.000115445	8.5936E-05	5.92658E-05	0.000113779	9.87702E-05	0.000110473	0.00013711	0.000138351	9.34615E-05	0.000121665	7.65248E-05
P441-PWY: superpathway of N-acetylneuraminate degradation	8.95392E-05	5.60333E-05	0.000112008	2.26693E-05	8.38562E-05	1.9917E-05	0.000121625	8.32766E-05	0.000145484	8.35417E-05	0.000170186	6.14607E-05	0.000117008	3.58759E-05
P461-PWY: hexitol fermentation to lactate, formate, ethanol and acetate	4.6486E-05	4.26052E-05	4.61828E-05	2.96647E-05	4.72826E-05	1.23921E-05	7.9967E-05	4.69035E-05	9.81095E-05	4.30735E-05	0.000181447	5.22056E-05	5.43598E-05	2.21231E-05
P562-PWY: myo-inositol degradation I	0	0	0	0	0	0	0	0	0	0	1.9239E-06	0	0	0
P621-PWY: nylon-6 oligomer degradation	0	0	0	0	0	0	0	0	0	0	0	0	0	0
PANTO-PWY: phosphopantothenate biosynthesis I	0.000454313	0.000436719	0.000346879	0.000527022	0.00039771	0.000523902	0.000405625	0.000318154	0.000284008	0.000337345	0.00033403	0.000539549	0.000411982	0.000484326
PANTOSYN-PWY: pantothenate and coenzyme A biosynthesis I	0.00031886	0.000310811	0.000259265	0.000385373	0.000257611	0.000252184	0.000271725	0.000181474	0.000175768	0.000240209	0.00025013	0.00014693	0.000273257	0.000285249
PENTOSE-P-PWY: pentose phosphate pathway	5.99232E-05	3.20532E-05	0.000156629	2.99779E-05	7.45847E-05	1.95993E-05	5.28021E-05	1.25112E-05	0.000119873	6.0625E-05	0.000157643	2.54975E-05	7.6489E-05	3.47592E-05
PEPTIDOGLYCANSYN-PWY: peptidoglycan biosynthesis I (meso-diaminopimelate containing)	0.000697283	0.000695569	0.000431899	0.000856896	0.000583978	0.000763835	0.000728025	0.000732947	0.00047951	0.000631576	0.000408346	0.000740382	0.000592979	0.000588248
PHOSLIPSYN-PWY: superpathway of phospholipid biosynthesis I (bacteria)	0.000214425	7.63486E-05	0.000196699	0.000177764	0.000177049	9.55269E-05	0.000206864	0.000153606	0.000154374	9.62323E-05	0.000199666	6.62978E-05	0.000271296	0.000111939
POLYAMINSYN3-PWY: superpathway of polyamine biosynthesis II	5.47375E-05	2.9649E-05	5.2669E-05	4.05016E-07	5.64152E-05	8.02359E-05	8.6035E-05	6.13734E-05	2.28052E-05	1.99704E-05	0	1.78195E-05	3.65427E-05	2.70864E-05
POLYAMSYN-PWY: superpathway of polyamine biosynthesis I	6.9637E-05	4.80802E-05	7.06953E-05	2.1579E-05	9.01357E-05	9.66335E-05	8.09635E-05	6.20019E-05	3.33345E-05	0.000140986	0.000153319	7.85545E-05	4.45025E-05	4.53926E-05
POLYISOPRENSYN-PWY: polyisoprenoid biosynthesis (E. coli)	1.22437E-05	1.86684E-06	3.33308E-05	7.94808E-07	1.76358E-05	0	2.0794E-05	1.14885E-06	4.18928E-05	4.92951E-06	6.33788E-05	0	4.76823E-05	0
PPGPPMET-PWY: ppGpp biosynthesis	0.000134431	3.03761E-05	4.88542E-05	0.000127276	3.40958E-05	1.92758E-05	8.77699E-05	6.24855E-05	5.82772E-05	1.8256E-05	7.90543E-05	0	0.00010919	1.04094E-05
PROTOCATECHUATE-ORTHO-CLEAVAGE-PWY: protocatechuate degradation II (ortho-cleavage pathway)	0	0	2.51233E-06	0	8.94358E-07	0	8.47888E-06	0	3.25078E-06	0	7.63345E-06	0	1.78321E-07	0
PRPP-PWY: superpathway of histidine, purine, and pyrimidine biosynthesis	0.000179885	0.000170629	0.00016446	0.000132886	0.000171974	0.000119988	0.000215402	0.000160767	0.000174534	0.000202118	0.000241884	0.000115987	0.00017178	0.000133646
PWY-101: photosynthesis light reactions	0	2.39927E-06	0	0	6.7589E-07	0	0	0	3.38941E-07	0	6.13646E-07	0	1.3209E-06	0
PWY-1042: glycolysis IV (plant cytosol)	0.000523406	0.00066243	0.000334706	0.000692171	0.000439783	0.00031303	0.000634458	0.000638997	0.000447823	0.000655587	0.000359721	0.00040196	0.000353517	0.000458982
PWY-1269: CMP-3-deoxy-D-manno-octulosonate biosynthesis I	9.26583E-05	8.17024E-05	0.000164501	0.000128043	0.000122156	0.000122806	0.000116621	6.12866E-05	0.000136964	0.000108959	0.000289634	0.000136894	0.000330725	8.06296E-05
PWY-1861: formaldehyde assimilation II (RuMP Cycle)	3.26726E-06	0	5.75101E-07	0	0	0	0	0	0	0.01695	7.30554E-07	1.06969E-06	0	0
PWY-241: C4 photosynthetic carbon assimilation cycle, NADP-ME type	4.33422E-06	6.54131E-06	1.75347E-06	0	8.25863E-05	1.53023E-06	0	0	1.85798E-05	1.54989E-05	1.05648E-05	0	2.3874E-06	1.2393E-05
PWY-2723: trehalose degradation V	5.66965E-06	5.59607E-07	2.80843E-05	0	1.55921E-05	0	3.67863E-06	0	4.30882E-05	0	5.32381E-05	0	4.13487E-05	0
PWY-2941: L-lysine biosynthesis II	8.5483E-05	4.12654E-05	7.06733E-05	3.69425E-05	0.000140719	6.1544E-05	4.76654E-05	0.000234466	7.05262E-05	7.77485E-05	0.000135947	4.59896E-05	5.34447E-05	6.89705E-05
PWY-2942: L-lysine biosynthesis III	0.000605069	0.000682823	0.000399671	0.000774305	0.000478718	0.00112538	0.000616317	0.000566257	0.000350723	0.000528366	0.000369835	0.000755796	0.00054422	0.00056408
PWY-3001: superpathway of L-isoleucine biosynthesis I	0.000362037	0.000286987	0.000232074	0.000248947	0.000292575	0.000212457	0.000303461	0.000281094	0.00023844	0.000389766	0.000276158	0.000230335	0.000271086	0.000271889
PWY-3781: aerobic respiration I (cytochrome c)	0	8.51183E-06	5.75526E-05	0	2.01622E-06	0	1.14855E-05	0	2.96261E-07	1.16198E-06	4.93133E-06	0	9.96554E-06	0
PWY-3801: sucrose degradation II (sucrose synthase)	0	0	0	0	0	0	0	0	0	0	2.41006E-05	0	0	0
PWY-3841: folate transformations II	0.000262218	0.000364061	0.000327077	0.000517686	0.000310632	0.000309266	0.000255797	0.000194763	0.000232646	0.000325774	0.000315114	0.000417935	0.00023557	0.00046849
PWY-4041: &gamma;-glutamyl cycle	1.19017E-05	6.19211E-07	3.8809E-05	8.60956E-08	1.58701E-05	0	1.34547E-05	0	7.71235E-05	0	8.26779E-05	0	3.40006E-05	0
PWY-4242: pantothenate and coenzyme A biosynthesis III	0.000163027	0.000159741	0.000162642	0.000240108	0.000151433	0.000117919	0.000153675	8.71143E-05	9.70927E-05	0.000114076	0.000192224	4.44158E-05	0.000199602	0.000113261
PWY-4321: L-glutamate degradation IV	0	0	0	0	0	0	0	0	0	0	1.82811E-06	0	0	0
PWY-4361: S-methyl-5-thio-&alpha;-D-ribose 1-phosphate degradation	0	0	0	0	0	0	0	0	8.44538E-07	0	3.69329E-06	0	0	0
PWY-4702: phytate degradation I	3.43444E-06	3.24469E-05	3.27059E-05	1.00386E-07	1.68551E-05	0	1.44284E-05	5.04728E-07	3.58127E-05	1.54768E-05	4.96086E-05	0	2.05543E-05	0
PWY-4981: L-proline biosynthesis II (from arginine)	8.59384E-05	0.000115117	2.97427E-05	1.53941E-05	0.000176946	2.76898E-05	9.46582E-05	7.70706E-05	7.01741E-05	7.45327E-05	3.59674E-05	3.66821E-05	6.17834E-05	1.01491E-05
PWY-4984: urea cycle	1.18672E-05	2.36954E-05	3.24284E-05	3.53804E-05	1.84236E-05	2.23565E-05	1.08337E-05	5.10584E-06	1.38505E-05	4.80043E-05	1.80085E-05	3.38562E-05	1.88095E-05	3.35637E-05
PWY-5004: superpathway of L-citrulline metabolism	3.00518E-06	2.98396E-06	6.23892E-06	0	2.4819E-06	0	2.82709E-06	0	7.54142E-06	0	1.24086E-06	0	1.02554E-06	0
PWY-5005: biotin biosynthesis II	2.12887E-05	0	5.40742E-05	6.01132E-05	2.87849E-06	0	5.17891E-05	3.03156E-05	1.79554E-06	1.30908E-05	0.000103672	1.61921E-05	6.54776E-05	1.33723E-07
PWY-5022: 4-aminobutanoate degradation V	9.68272E-06	7.50598E-07	6.32291E-05	1.15764E-07	2.36973E-05	2.12138E-07	3.54875E-05	9.59086E-06	0.05814	7.20677E-05	8.10157E-05	1.98964E-06	4.50759E-05	3.02553E-06
PWY-5028: L-histidine degradation II	0	0	0	0	0	0	0	0	0	1.38205E-07	0	0	0	0
PWY-5030: L-histidine degradation III	4.99116E-05	1.76947E-05	5.64781E-05	0.000211974	6.14013E-05	8.11723E-05	6.60248E-05	4.89441E-05	3.47187E-05	5.6456E-05	4.22361E-05	3.64865E-05	9.33277E-05	4.99198E-05
PWY-5083: NAD/NADH phosphorylation and dephosphorylation	1.70375E-05	4.32088E-06	6.98632E-05	1.68828E-07	3.04313E-05	0	2.9299E-05	4.07998E-07	8.68349E-05	3.01489E-07	0.000122257	8.06442E-07	5.23218E-05	0
PWY-5088: L-glutamate degradation VIII (to propanoate)	5.72155E-07	1.77659E-06	2.62278E-07	0	1.00571E-05	0	2.15898E-05	3.18824E-06	1.80678E-05	5.45086E-07	1.77962E-05	0	0	0
PWY-5097: L-lysine biosynthesis VI	0.000659848	0.000790219	0.000405133	0.000786661	0.000510504	0.00114101	0.000638348	0.000598552	0.000362876	0.000536372	0.000377915	0.000805728	0.000547971	0.000551376
PWY-5100: pyruvate fermentation to acetate and lactate II	0.000305441	0.000232065	0.000188497	0.000153792	0.000200307	0.000107488	0.000333193	0.000250301	0.000175861	0.000193231	0.000158419	0.000114085	0.00017381	0.000124904
PWY-5101: L-isoleucine biosynthesis II	6.58452E-05	9.89206E-05	1.1144E-05	1.29454E-05	3.0923E-05	2.31415E-05	1.89428E-05	6.34031E-05	1.65858E-05	3.09458E-05	1.36741E-05	6.87828E-05	3.9116E-05	0.000206257
PWY-5103: L-isoleucine biosynthesis III	0.000388074	0.000446907	0.000258828	0.000460897	0.000283086	0.000248021	0.000362847	0.000341844	0.000223822	0.000451601	0.000257763	0.000250377	0.000281159	0.000281006
PWY-5104: L-isoleucine biosynthesis IV	0.000258627	0.000252915	0.000104709	0.000109339	0.0001395	8.23611E-05	0.000237271	0.000217525	0.000166176	0.000229299	9.91327E-06	0.000122716	4.66065E-05	7.35455E-05
PWY-5121: superpathway of geranylgeranyl diphosphate biosynthesis II (via MEP)	6.91274E-05	1.43843E-05	5.16252E-05	2.75835E-06	7.67218E-05	4.59276E-05	6.53818E-05	3.61425E-05	8.86699E-05	2.47695E-05	0.000105011	1.79229E-05	8.33024E-05	5.09437E-05
PWY-5136: fatty acid &beta;-oxidation II (peroxisome)	3.43272E-05	6.96987E-06	3.03074E-05	3.70914E-07	2.70541E-05	1.05391E-06	3.44329E-05	1.2029E-05	5.4073E-05	1.02529E-05	2.8569E-05	3.79172E-07	2.65165E-05	1.77357E-06
PWY-5138: unsaturated, even numbered fatty acid &beta;-oxidation	5.22216E-07	5.58734E-07	9.84557E-06	0	6.05115E-06	0	6.75978E-07	0	1.70341E-05	0	2.69733E-05	0	9.39847E-07	0
PWY-5154: L-arginine biosynthesis III (via N-acetyl-L-citrulline)	0.000112028	5.9017E-05	0.000164016	4.90885E-05	8.14257E-05	3.37648E-05	8.14178E-05	6.74751E-05	0.000147631	9.29798E-05	0.000192069	4.65376E-05	0.000129366	1.68222E-05
PWY-5173: superpathway of acetyl-CoA biosynthesis	8.46689E-06	6.40125E-07	1.65616E-05	0	9.31711E-06	0	1.70054E-05	1.27452E-06	2.71561E-05	1.53365E-07	4.42383E-05	3.54671E-06	1.74764E-05	0
PWY-5177: glutaryl-CoA degradation	0.000114835	6.87825E-05	3.04958E-05	3.91635E-05	8.40496E-05	4.25128E-05	9.82905E-05	6.4422E-05	5.71163E-05	0.000105923	2.48725E-05	5.61903E-05	2.15447E-05	9.96206E-05
PWY-5180: toluene degradation I (aerobic) (via o-cresol)	0	0	0	0	0	0	0	0	0	0	0	0	0	0
PWY-5181: toluene degradation III (aerobic) (via p-cresol)	0	0	0	0	0	0	0	0	0	0	4.36888E-06	0	0	0
PWY-5182: toluene degradation II (aerobic) (via 4-methylcatechol)	0	0	0	0	0	0	0	0	0	0	0	0	0	0
PWY-5188: tetrapyrrole biosynthesis I (from glutamate)	0.000158375	0.000132517	0.000149313	6.97229E-05	0.000147025	0.000110763	0.000147807	9.33149E-05	7.82023E-05	0.000104974	0.000219629	0.000123847	0.000138398	7.32314E-05
PWY-5189: tetrapyrrole biosynthesis II (from glycine)	6.84093E-05	1.24187E-05	4.10883E-05	6.14028E-06	4.78274E-05	7.30655E-05	9.51731E-05	5.46893E-05	5.58493E-05	1.20541E-05	0.000101568	2.13427E-06	8.54472E-05	1.00418E-05
PWY-5198: factor 420 biosynthesis	1.57683E-07	0	0	0	0	0	0	3.77954E-07	2.08483E-06	2.67188E-06	0	0	8.2857E-08	0
PWY-5304: superpathway of sulfur oxidation (Acidianus ambivalens)	3.1211E-05	2.95394E-05	4.29161E-06	7.02695E-06	1.68516E-05	9.56293E-06	2.14028E-05	1.53718E-05	5.53722E-06	2.36673E-05	2.25715E-06	8.68278E-06	1.24349E-06	2.21573E-05
PWY-5345: superpathway of L-methionine biosynthesis (by sulfhydrylation)	5.16251E-05	3.57737E-05	9.34793E-05	1.77106E-05	8.68746E-05	1.33196E-05	0.000116327	1.52747E-05	0.000120064	7.60329E-05	0.000144612	1.36926E-05	0.000103599	8.36085E-06
PWY-5347: superpathway of L-methionine biosynthesis (transsulfuration)	0.000187201	0.000175548	0.000119565	6.05721E-05	0.000176539	0.000110319	0.000223023	0.000180476	0.000149714	0.000189783	0.000217707	9.4549E-05	0.000116106	0.000153386
PWY-5367: petroselinate biosynthesis	2.05164E-05	2.61706E-05	4.59413E-06	2.10646E-05	1.4985E-05	5.27083E-06	3.82539E-05	1.11577E-05	6.45905E-06	3.55292E-05	1.3223E-05	2.24898E-05	0	5.68526E-07
PWY-5384: sucrose degradation IV (sucrose phosphorylase)	1.82613E-05	3.4571E-06	2.74655E-05	1.30682E-07	1.48727E-05	2.59408E-06	3.65346E-06	2.27712E-06	3.51348E-05	1.00601E-07	4.48144E-05	2.25241E-06	3.30878E-05	1.03474E-07
PWY-5415: catechol degradation I (meta-cleavage pathway)	0	0	0	0	1.34773E-06	0	0	0	2.57018E-07	0	2.01212E-06	0	0	0
PWY-5417: catechol degradation III (ortho-cleavage pathway)	0	0	0	0	4.98721E-07	0	0	0	0	0	3.51764E-06	0	0	0
PWY-5431: aromatic compounds degradation via &beta;-ketoadipate	0	0	0	0	4.98721E-07	0	0	0	0	0	3.51764E-06	0	0	0
PWY-5464: superpathway of cytosolic glycolysis (plants), pyruvate dehydrogenase and TCA cycle	2.75362E-05	3.29841E-06	3.79963E-05	0	2.84483E-05	0	4.37136E-05	5.98623E-06	6.13219E-05	8.5839E-07	0.000105566	1.6471E-05	3.52028E-05	0
PWY-5484: glycolysis II (from fructose 6-phosphate)	0.000181024	6.18377E-05	0.000169362	0.000365636	9.16669E-05	0.000168562	0.000248649	0.000255889	0.000256428	0.000204207	0.000249482	8.20226E-05	0.000299242	0.000161301
PWY-5505: L-glutamate and L-glutamine biosynthesis	0.000116977	9.0656E-05	5.39237E-05	0.000131977	3.78428E-05	1.75203E-05	6.91919E-05	9.96956E-05	4.38774E-05	6.01965E-05	2.99009E-05	2.16257E-05	9.41017E-05	2.79124E-05
PWY-5532: adenosine nucleotides degradation IV	0	0	0	0	0	0	0	0	7.33655E-07	0	0	0	0	0
PWY-561: superpathway of glyoxylate cycle and fatty acid degradation	2.99158E-05	6.45984E-06	4.34229E-05	3.91502E-07	3.18758E-05	0	1.29198E-05	0	7.04027E-05	0	5.26168E-05	0	4.07587E-05	0
PWY-5656: mannosylglycerate biosynthesis I	1.76669E-06	0	2.14474E-05	0	3.20428E-06	0	1.00918E-06	0	1.37724E-05	0	2.02606E-05	0	1.01208E-05	0
PWY-5659: GDP-mannose biosynthesis	0.000192034	0.000153012	0.000123615	0.000115914	0.000163473	0.000158623	0.000141655	0.000140356	0.000144731	0.00019651	9.07925E-05	5.94195E-05	0.000118691	0.000114756
PWY-5667: CDP-diacylglycerol biosynthesis I	0.000573876	0.000606416	0.00033274	0.000780811	0.000441021	0.000484404	0.000472036	0.000444218	0.000321912	0.000532441	0.000336077	0.000536948	0.000581527	0.000603358
PWY-5675: nitrate reduction V (assimilatory)	3.71647E-07	0	3.55469E-07	0	6.13498E-07	0	0	0	2.26538E-07	1.11416E-06	5.03587E-06	0	3.05466E-07	0
PWY-5676: acetyl-CoA fermentation to butanoate II	0.000103344	6.23588E-05	8.54043E-05	6.21455E-05	7.53168E-05	5.8285E-05	7.04929E-05	8.44041E-05	0.000124721	7.25315E-05	0.00011737	4.05176E-05	7.47122E-05	3.07173E-05
PWY-5686: UMP biosynthesis	0.000737322	0.000882829	0.000450265	0.000534674	0.000581062	0.00111208	0.00066674	0.000609394	0.000465622	0.00068487	0.000425332	0.000868885	0.00032631	0.000604483
PWY-5690: TCA cycle II (plants and fungi)	7.56437E-05	4.9953E-05	7.50795E-05	2.5017E-05	9.72253E-05	2.93523E-05	5.62284E-05	3.30449E-05	8.8317E-05	4.45718E-05	0.000130549	7.26264E-05	7.12737E-05	2.40369E-05
PWY-5692: allantoin degradation to glyoxylate II	4.94995E-06	5.1844E-07	1.47293E-06	0	2.77031E-06	0	0	0	0	0	0	0	7.62658E-07	0
PWY-5695: urate biosynthesis/inosine 5'-phosphate degradation	0.000432321	0.000327111	0.00041687	0.00078394	0.000354508	0.00035459	0.000354038	0.000473886	0.000436706	0.000351553	0.000411657	0.000339292	0.000472268	0.000520352
PWY-5705: allantoin degradation to glyoxylate III	7.13269E-06	8.00185E-07	1.58486E-05	0	4.70548E-06	0	2.33469E-06	0	5.66059E-06	0	1.79923E-05	0	2.80511E-05	0
PWY-5723: Rubisco shunt	3.54209E-05	1.1493E-05	8.09632E-05	5.46954E-07	3.89085E-05	0	3.83185E-05	3.1799E-05	0.000134629	0	0.000158781	0	8.75464E-05	0
PWY-5747: 2-methylcitrate cycle II	3.69265E-06	8.15142E-07	4.03301E-06	0	7.7413E-07	0	9.57272E-06	0	6.64398E-06	0	2.43272E-05	0	2.6641E-05	0
PWY-5791: 1,4-dihydroxy-2-naphthoate biosynthesis II (plants)	1.64644E-05	4.30575E-06	9.59798E-05	1.54823E-06	2.90372E-05	0	2.00386E-05	0	4.97131E-05	3.23916E-07	0.000125937	1.1408E-06	4.77313E-05	4.7935E-07
PWY-5837: 1,4-dihydroxy-2-naphthoate biosynthesis I	1.64644E-05	4.30575E-06	9.59798E-05	1.54823E-06	2.90372E-05	0	2.00386E-05	0	4.97131E-05	3.23916E-07	0.000125937	1.1408E-06	4.77313E-05	4.7935E-07
PWY-5838: superpathway of menaquinol-8 biosynthesis I	3.58172E-05	9.22091E-06	0.000119978	2.47307E-06	5.88548E-05	0	4.68472E-05	0	9.69793E-05	0	0.000162713	0	9.71456E-05	0
PWY-5840: superpathway of menaquinol-7 biosynthesis	4.67081E-05	1.2731E-05	0.000119978	4.78232E-06	5.88548E-05	0	3.45073E-05	0	6.47095E-05	1.10457E-06	0.000158576	3.85003E-06	9.71456E-05	1.63506E-06
PWY-5845: superpathway of menaquinol-9 biosynthesis	3.58172E-05	0	0.000119978	0	5.88548E-05	0	2.49255E-05	0	6.47095E-05	0	0.000158576	0	9.71456E-05	0
PWY-5850: superpathway of menaquinol-6 biosynthesis I	3.58172E-05	0	0.000119978	0	5.88548E-05	0	2.49255E-05	0	6.47095E-05	0	0.000158576	0	9.71456E-05	0
PWY-5855: ubiquinol-7 biosynthesis (prokaryotic)	9.95243E-06	2.40995E-06	2.53313E-05	0	1.70829E-05	0	1.37978E-05	0	4.02228E-05	1.76401E-07	8.02052E-05	0	2.85677E-05	0
PWY-5856: ubiquinol-9 biosynthesis (prokaryotic)	9.95243E-06	2.40995E-06	2.53313E-05	0	1.70829E-05	0	1.37978E-05	0	4.02228E-05	1.76401E-07	8.02052E-05	0	2.85677E-05	0
PWY-5857: ubiquinol-10 biosynthesis (prokaryotic)	9.95243E-06	2.40995E-06	2.53313E-05	0	1.70829E-05	0	1.37978E-05	0	4.02228E-05	1.76401E-07	8.02052E-05	0	2.85677E-05	0
PWY-5860: superpathway of demethylmenaquinol-6 biosynthesis I	2.48521E-05	0	9.22348E-05	0	4.30664E-05	0	1.71989E-05	0	4.84331E-05	0	0.000130031	0	7.24508E-05	0
PWY-5861: superpathway of demethylmenaquinol-8 biosynthesis	2.48521E-05	6.22953E-06	9.22348E-05	1.65071E-06	4.30664E-05	0	3.33524E-05	0	7.73172E-05	0	0.000134228	0	7.24508E-05	0
PWY-5862: superpathway of demethylmenaquinol-9 biosynthesis	2.48521E-05	0	9.22348E-05	0	4.30664E-05	0	1.71989E-05	0	4.84331E-05	0	0.000130031	0	7.24508E-05	0
PWY-5863: superpathway of phylloquinol biosynthesis	1.70149E-05	4.12214E-06	5.51828E-05	1.74954E-06	2.84462E-05	0	2.04452E-05	0	2.73689E-05	3.69706E-07	9.17419E-05	1.28779E-06	4.18408E-05	5.46742E-07
PWY-5896: superpathway of menaquinol-10 biosynthesis	3.58172E-05	0	0.000119978	0	5.88548E-05	0	2.49255E-05	0	6.47095E-05	0	0.000158576	0	9.71456E-05	0
PWY-5897: superpathway of menaquinol-11 biosynthesis	4.42478E-05	1.24398E-05	0.000173393	4.62478E-06	6.94838E-05	0	5.07713E-05	0	0.000100205	9.67957E-07	0.000187985	3.40785E-06	0.000107404	1.43434E-06
PWY-5898: superpathway of menaquinol-12 biosynthesis	4.42478E-05	1.24398E-05	0.000173393	4.62478E-06	6.94838E-05	0	5.07713E-05	0	0.000100205	9.67957E-07	0.000187985	3.40785E-06	0.000107404	1.43434E-06
PWY-5899: superpathway of menaquinol-13 biosynthesis	4.42478E-05	1.24398E-05	0.000173393	4.62478E-06	6.94838E-05	0	5.07713E-05	0	0.000100205	9.67957E-07	0.000187985	3.40785E-06	0.000107404	1.43434E-06
PWY-5910: superpathway of geranylgeranyldiphosphate biosynthesis I (via mevalonate)	1.96303E-06	0	1.94581E-06	0	3.49442E-06	0	3.55454E-07	0	0	8.11309E-07	4.10579E-06	0	7.89063E-07	0
PWY-5913: TCA cycle VI (obligate autotrophs)	1.92011E-05	5.26377E-06	4.68731E-05	0	8.47167E-05	1.23029E-06	2.09433E-05	1.72536E-06	6.24302E-05	1.32157E-05	6.56456E-05	9.72283E-08	5.39034E-05	2.42381E-05
PWY-5918: superpathay of heme biosynthesis from glutamate	1.59768E-05	1.22951E-05	4.92089E-05	2.08311E-06	3.31074E-05	2.33752E-05	2.84735E-05	1.0145E-06	1.4273E-05	1.38817E-05	0.000107804	4.63604E-06	4.35602E-05	1.67407E-05
PWY-5920: superpathway of heme biosynthesis from glycine	5.21924E-06	3.84642E-06	2.23249E-05	0	1.54204E-05	0	1.63525E-05	0	6.53236E-06	0	4.87412E-05	0	1.5773E-05	0
PWY-5941: glycogen degradation II (eukaryotic)	5.94094E-05	4.8961E-05	2.15208E-05	0.000120518	3.6457E-05	5.6207E-05	1.30661E-05	0	4.26193E-06	1.6904E-05	1.64414E-05	5.1132E-06	3.65121E-05	1.6822E-05
PWY-5971: palmitate biosynthesis II (bacteria and plants)	4.88543E-05	2.26424E-05	8.75492E-05	1.78324E-05	8.27499E-05	1.2653E-05	5.21634E-05	1.52143E-05	8.63725E-05	4.52353E-06	0.000137977	1.20281E-05	0	7.5219E-06
PWY-5973: cis-vaccenate biosynthesis	0.000416139	0.000284621	0.00028119	0.000668322	0.000330165	0.000434964	0.000328344	0.000320718	0.00019882	0.000298687	0.000238202	0.000372926	0.000339594	0.000426193
PWY-5989: stearate biosynthesis II (bacteria and plants)	3.23111E-05	3.1844E-05	7.39639E-05	3.01666E-05	5.78013E-05	8.14983E-06	5.06089E-05	1.61053E-05	7.19662E-05	4.61701E-05	0.000109079	2.98621E-05	0.00010659	5.45947E-06
PWY-6113: superpathway of mycolate biosynthesis	4.54616E-05	2.24004E-05	4.56734E-05	1.78537E-05	6.68138E-05	1.17419E-05	5.08175E-05	1.48456E-05	5.3289E-05	4.71542E-06	9.27365E-05	1.22164E-05	0	4.65797E-06
PWY-6121: 5-aminoimidazole ribonucleotide biosynthesis I	0.000530778	0.000770063	0.000381474	0.000589108	0.00045747	0.000402495	0.000562824	0.000507862	0.000411683	0.00053504	0.000346103	0.000456287	0.000320281	0.000419599
PWY-6122: 5-aminoimidazole ribonucleotide biosynthesis II	0.000567501	0.000768345	0.000360234	0.000536688	0.000448322	0.000417906	0.000611744	0.000596773	0.000405552	0.000523849	0.000328342	0.000438792	0.000410167	0.000380295
PWY-6123: inosine-5'-phosphate biosynthesis I	0.000349995	0.000311026	0.000204108	0.000527312	0.00023494	0.000249498	0.000325131	0.000318452	0.000184516	0.000321555	0.000210034	0.000209648	0.000352676	0.000268873
PWY-6124: inosine-5'-phosphate biosynthesis II	0.0003159	0.000275328	0.000181421	0.000477799	0.000208148	0.000214511	0.000292567	0.000287328	0.000164262	0.000293615	0.000188871	0.000181164	0.000321249	0.000237663
PWY-6125: superpathway of guanosine nucleotides de novo biosynthesis II	0.000318132	0.000361493	0.000306138	0.000403286	0.000248785	0.000262447	0.000326007	0.000383191	0.000283529	0.000235346	0.000433912	0.000286256	0.000277702	0.000290744
PWY-6126: superpathway of adenosine nucleotides de novo biosynthesis II	0.000541517	0.000539363	0.000371035	0.000505487	0.000334215	0.000332942	0.000499725	0.000543388	0.000390353	0.000300868	0.000510104	0.000351232	0.000414447	0.000371837
PWY-6145: superpathway of sialic acids and CMP-sialic acids biosynthesis	0	0	0	0	0	0	0	0	0	0	0	0	4.9909E-07	0
PWY-6147: 6-hydroxymethyl-dihydropterin diphosphate biosynthesis I	5.87876E-05	3.90668E-05	8.33221E-05	8.06062E-05	9.79104E-05	9.36187E-05	3.73257E-05	4.5196E-05	6.82254E-05	2.95918E-05	0.000113905	3.12839E-05	4.69397E-05	7.8389E-05
PWY-6151: S-adenosyl-L-methionine cycle I	0.000701528	0.000484507	0.000352383	0.000587598	0.00047523	0.00112105	0.000535485	0.00066254	0.000325257	0.000465824	0.000257974	0.000937101	0.000596039	0.000641414
PWY-6163: chorismate biosynthesis from 3-dehydroquinate	0.000651931	0.000651524	0.000381725	0.000583345	0.000497111	0.000557178	0.000562182	0.000456011	0.00033654	0.00050975	0.00037592	0.000566446	0.00052387	0.00046116
PWY-6165: chorismate biosynthesis II (archaea)	0	0	0	0	0	0	1.02539E-06	0	2.11682E-05	0	0	0	0	0
PWY-6167: flavin biosynthesis II (archaea)	5.7473E-07	0	0	0	0	0	0	0	4.8642E-06	8.22636E-06	0	0	0	0
PWY-6168: flavin biosynthesis III (fungi)	0.000258356	0.000163161	0.000260803	0.000446476	0.000221985	0.000293054	0.000244761	0.000233628	0.000208314	0.000210743	0.000185586	0.000193022	0.000380772	0.000299819
PWY-6174: mevalonate pathway II (archaea)	1.4521E-07	0	0	0	0	0	0	0	0	8.42152E-07	0	0	0	0
PWY-6182: superpathway of salicylate degradation	0	0	0	0	0	0	0	0	0	0	2.98185E-06	0	0	0
PWY-6185: 4-methylcatechol degradation (ortho cleavage)	0	0	0	0	4.18763E-07	0	0	0	0	0	2.89004E-06	0	0	0
PWY-621: sucrose degradation III (sucrose invertase)	0.000148711	9.11713E-05	9.79534E-05	8.03295E-05	0.000107937	6.80807E-05	9.45641E-05	6.71652E-05	2.6929E-05	0.000145665	9.03972E-05	7.74985E-05	3.18678E-05	0.000115857
PWY-622: starch biosynthesis	0	0	0	0	0	0	0	0	0	0	1.82716E-06	0	0	0
PWY-6263: superpathway of menaquinol-8 biosynthesis II	1.42121E-06	2.54854E-06	0	1.49459E-06	1.52425E-05	0	2.47597E-06	0	1.78989E-05	0	9.38442E-07	0	9.94584E-06	0
PWY-6270: isoprene biosynthesis I	0.000141524	7.53332E-05	0.000193691	4.0795E-06	0.000184408	0.000214639	0.000132924	6.91994E-05	0.00019268	3.8162E-05	0.000236679	3.05555E-05	0.000202164	8.77595E-05
PWY-6277: superpathway of 5-aminoimidazole ribonucleotide biosynthesis	0.000567501	0.000768345	0.000360234	0.000536688	0.000448322	0.000417906	0.000611744	0.000596773	0.000405552	0.000523849	0.000328342	0.000438792	0.000410167	0.000380295
PWY-6281: L-selenocysteine biosynthesis II (archaea and eukaryotes)	0	0	0	0	0	0	0	0	0	1.0252E-06	0	0	0	0
PWY-6282: palmitoleate biosynthesis I (from (5Z)-dodec-5-enoate)	3.30847E-05	1.86023E-05	7.93781E-05	1.45028E-05	6.13641E-05	8.25166E-06	4.00281E-05	0.01141	7.62836E-05	4.18322E-06	0.000126329	1.03556E-05	0.000110977	5.50126E-06
PWY-6284: superpathway of unsaturated fatty acids biosynthesis (E. coli)	3.47021E-05	2.05647E-05	1.90543E-05	1.60776E-05	3.94038E-05	8.94731E-06	4.41077E-05	1.26463E-05	2.52701E-05	4.64306E-06	4.84533E-05	1.1488E-05	0	1.65363E-06
PWY-6285: superpathway of fatty acids biosynthesis (E. coli)	3.56663E-05	1.6097E-05	3.27321E-05	7.52628E-06	5.56293E-05	0	2.8522E-05	0	4.0752E-05	3.07459E-06	7.46122E-05	0	0	2.84584E-06
PWY-6305: putrescine biosynthesis IV	0.000130852	9.65766E-05	7.17133E-05	6.80593E-05	0.000100748	7.74849E-05	0.00010281	8.7999E-05	7.78565E-05	0.000141672	0.000114162	6.00212E-05	9.39206E-05	4.97757E-05
PWY-6317: galactose degradation I (Leloir pathway)	0.000300584	0.00022103	0.00016847	0.0001499	0.000274594	0.000165659	0.000299185	0.000295516	0.000183499	0.000347717	0.000172602	0.000208642	0.000144299	0.000260887
PWY-6318: L-phenylalanine degradation IV (mammalian, via side chain)	0	0	0	0	0	0	1.39067E-05	0	4.12139E-06	1.41813E-07	0	0	8.09884E-07	0
PWY-6353: purine nucleotides degradation II (aerobic)	0.000138173	5.12755E-05	0.00012135	4.53312E-05	7.21113E-05	5.66889E-05	8.55807E-05	6.1181E-05	0.000177138	8.5061E-05	0.000198033	8.11018E-05	0.000100358	2.56833E-05
PWY-6385: peptidoglycan biosynthesis III (mycobacteria)	0.000526727	0.000289226	0.000308664	0.000468084	0.000418878	0.000373923	0.000577344	0.00033827	0.000253088	0.000355737	0.000318129	0.0004042	0.000274433	0.00043032
PWY-6386: UDP-N-acetylmuramoyl-pentapeptide biosynthesis II (lysine-containing)	0.000703249	0.000669954	0.000442892	0.000879947	0.000575603	0.0007512	0.000730058	0.000729583	0.000487198	0.000642103	0.000421626	0.000748614	0.000588998	0.000598527
PWY-6387: UDP-N-acetylmuramoyl-pentapeptide biosynthesis I (meso-diaminopimelate containing)	0.000689033	0.000665887	0.000428608	0.000852088	0.000567672	0.000695892	0.000716245	0.000722745	0.000478425	0.000629431	0.000402876	0.000718142	0.000590845	0.000583962
PWY-6396: superpathway of 2,3-butanediol biosynthesis	0	0	0	0	0	0	0	0	0	0	1.37041E-06	0	0	0
PWY-6435: 4-hydroxybenzoate biosynthesis V	1.30749E-05	0	0	0	0	0	0	0	0	0	0	0	1.8461E-05	0
PWY-6467: Kdo transfer to lipid IVA III (Chlamydia)	3.03715E-06	4.56658E-07	0	0	0	0	0	0	1.01561E-06	0	4.06752E-07	0	0	0
PWY-6471: peptidoglycan biosynthesis IV (Enterococcus faecium)	1.32481E-05	0	7.72359E-06	0	0	0	2.81989E-06	0	0	0	3.36155E-05	5.78059E-06	1.04457E-06	0
PWY-6507: 4-deoxy-L-threo-hex-4-enopyranuronate degradation	0.000152401	9.21228E-05	5.67383E-05	6.11005E-05	9.13766E-05	4.22386E-05	0.000124999	7.12388E-05	0.08351	0.000120979	8.88835E-05	8.35176E-05	8.28446E-05	0.000142657
PWY-6519: 8-amino-7-oxononanoate biosynthesis I	3.48893E-05	1.73429E-05	8.10658E-05	1.3807E-05	6.40917E-05	9.89978E-06	3.71572E-05	1.1075E-05	7.90495E-05	3.45913E-06	0.000120282	8.45479E-06	0.000110119	6.53602E-06
PWY-6527: stachyose degradation	0.00023249	0.000179501	0.00014877	0.000127431	0.000203794	0.000139072	0.000221367	0.000245245	0.000153149	0.000308226	0.000162852	0.000168028	5.79294E-05	0.000217802
PWY-6531: mannitol cycle	9.63997E-07	3.67826E-06	1.14989E-05	0	8.44716E-06	4.44247E-06	6.2478E-06	5.74011E-06	1.66867E-06	1.17041E-05	2.63988E-06	3.20531E-05	3.85066E-06	7.31028E-06
PWY-6545: pyrimidine deoxyribonucleotides de novo biosynthesis III	0.000219874	0.000177791	0.000125951	8.82548E-05	0.00019002	0.000201931	0.00022703	0.000269103	0.000136183	0.000162472	0.000202346	0.000209905	0.000178304	0.000159159
PWY-6549: L-glutamine biosynthesis III	3.66247E-05	4.92769E-05	2.28526E-05	9.61514E-06	4.49333E-05	3.23013E-06	3.37195E-05	2.78361E-05	2.22378E-05	2.51312E-05	1.29121E-05	5.01033E-06	2.46725E-05	2.51514E-05
PWY-6562: norspermidine biosynthesis	0	0	0	0	2.5819E-06	0	0	0	0	0	7.77634E-08	0	0	0
PWY-6588: pyruvate fermentation to acetone	2.34603E-05	3.15012E-05	3.21614E-05	7.24407E-06	2.07391E-06	4.67054E-07	2.25533E-06	2.83124E-06	5.18078E-05	2.64871E-05	5.72092E-06	2.56935E-06	2.50744E-05	9.46153E-06
PWY-6590: superpathway of Clostridium acetobutylicum acidogenic fermentation	7.64992E-05	4.34081E-05	1.52198E-05	1.10713E-05	5.30694E-05	4.91443E-05	4.02942E-05	1.5093E-05	3.95395E-05	2.9471E-05	1.39874E-06	3.16027E-05	9.2115E-06	2.12664E-05
PWY-6595: superpathway of guanosine nucleotides degradation (plants)	2.47565E-05	1.64617E-05	2.21808E-05	2.14801E-05	9.13316E-06	1.9902E-06	1.42787E-06	3.47688E-06	9.35199E-06	1.28122E-05	1.0081E-05	4.10573E-06	2.41492E-05	8.34165E-06
PWY-6606: guanosine nucleotides degradation II	6.60891E-05	1.93592E-05	2.58352E-05	2.42858E-05	2.17288E-05	2.78737E-05	2.07134E-05	1.95052E-05	2.33826E-05	3.70215E-05	6.46009E-05	3.92286E-05	5.2557E-05	9.82418E-06
PWY-6608: guanosine nucleotides degradation III	0.000220999	0.000190357	0.000146907	7.00524E-05	0.000188782	5.25414E-05	0.00022787	0.000161102	0.000265792	0.000196607	0.000166176	9.51936E-05	8.69311E-05	0.08914
PWY-6609: adenine and adenosine salvage III	0.000235124	0.000210352	0.000238796	0.000447943	0.000273133	0.000249814	0.000167647	0.000153117	0.00015919	0.000247424	0.000224249	0.000164496	0.000134694	0.000284963
PWY-6612: superpathway of tetrahydrofolate biosynthesis	3.04645E-05	2.21839E-05	5.0633E-05	1.70135E-05	2.59512E-05	8.48932E-06	4.97189E-06	2.18852E-05	6.86535E-05	3.80272E-05	0.000100692	1.70138E-05	4.30761E-05	1.09661E-05
PWY-6628: superpathway of L-phenylalanine biosynthesis	3.68189E-05	3.76937E-06	0.0001313	1.08981E-06	7.97999E-05	0	9.38387E-05	0	0.000139452	0	0.000210247	2.23982E-06	0.000178607	0
PWY-6629: superpathway of L-tryptophan biosynthesis	1.88544E-05	4.54191E-06	0.000113138	0	6.92931E-05	0	1.24621E-05	0	8.64013E-05	0	0.000202984	2.69927E-06	9.17299E-05	0
PWY-6630: superpathway of L-tyrosine biosynthesis	5.16018E-05	4.13851E-05	0.000120991	1.08945E-06	8.06065E-05	0	0.000108136	0	0.000132651	4.83952E-05	0.000173008	2.23624E-06	0.000177708	3.61708E-05
PWY-6660: 2-heptyl-3-hydroxy-4(1H)-quinolone biosynthesis	0	0	0	0	0	0	0	0	0	2.20846E-07	0	0	0	0
PWY-6662: superpathway of quinolone and alkylquinolone biosynthesis	0	0	0	0	0	0	0	0	0	2.02771E-07	0	0	0	0
PWY-6690: cinnamate and 3-hydroxycinnamate degradation to 2-oxopent-4-enoate	3.52792E-06	3.02989E-07	3.99795E-05	0	6.47869E-06	0	9.91613E-06	0	1.93412E-05	0	3.76612E-05	0	1.85066E-07	0
PWY-6700: queuosine biosynthesis	0.000628118	0.000550556	0.000463987	0.000926129	0.000542617	0.00115108	0.000610406	0.000685265	0.000336856	0.000387431	0.000443386	0.00086806	0.000694362	0.000579681
PWY-6703: preQ0 biosynthesis	0.000317229	0.000369612	0.000359103	0.000906148	0.000283739	0.000291362	0.00021934	0.000209206	0.000179216	0.000231207	0.00037595	0.000454814	0.000376492	0.000458692
PWY-6708: ubiquinol-8 biosynthesis (prokaryotic)	9.95243E-06	2.40995E-06	2.53313E-05	0	1.70829E-05	0	1.37978E-05	0	4.02228E-05	1.76401E-07	8.02052E-05	0	2.85677E-05	0
PWY-6731: starch degradation III	7.67723E-06	0	0	0	1.54091E-05	0	9.31762E-07	0	2.57398E-06	0	5.26849E-06	0	3.19229E-05	0
PWY-6737: starch degradation V	0.000700886	0.000986281	0.000337209	0.000301249	0.000636749	0.000305618	0.000698064	0.00066238	0.000415684	0.000748712	0.000254512	0.000612902	0.000347731	0.000652849
PWY-6760: xylose degradation III	0	0	0	0	0	0	0	0	0	0	1.30215E-07	0	0	0
PWY-6785: hydrogen production VIII	0	2.7971E-06	0	0	8.46028E-07	0	0	0	4.32099E-07	0	7.56812E-07	0	2.25694E-06	0
PWY-6803: phosphatidylcholine acyl editing	1.52616E-05	1.34466E-06	4.28999E-05	0	2.32807E-05	0	1.98691E-05	0	6.62039E-05	0	8.55607E-05	0	4.03712E-05	0
PWY-6823: molybdenum cofactor biosynthesis	3.88746E-06	4.53378E-07	2.32983E-05	0	1.14454E-05	0	3.01749E-06	0	3.89953E-05	0	5.09412E-05	0	1.41312E-05	0
PWY-6837: fatty acid beta-oxidation V (unsaturated, odd number, di-isomerase-dependent)	0	0	0	0	1.80609E-07	0	0	0	0	0	4.57193E-06	0	0	0
PWY-6859: all-trans-farnesol biosynthesis	7.85224E-06	1.58731E-06	2.04466E-05	6.10366E-07	1.53326E-05	0	7.47714E-07	6.49344E-07	3.73905E-05	3.0864E-06	4.88773E-05	0	3.34969E-05	0
PWY-6876: isopropanol biosynthesis	0	0	0	0	0	0	0	0	0	0	2.03063E-07	0	0	0
PWY-6891: thiazole biosynthesis II (Bacillus)	1.55289E-05	2.79519E-06	6.15437E-05	0	2.41063E-05	0	3.77195E-05	0	7.75482E-05	0	0.000106248	0	5.73294E-05	0
PWY-6892: thiazole biosynthesis I (E. coli)	8.46959E-05	6.90705E-05	0.000111268	3.28077E-05	7.14789E-05	1.79796E-05	9.87851E-05	8.92394E-05	0.000170663	9.7535E-05	0.000132206	3.48377E-05	9.25123E-05	3.88146E-05
PWY-6895: superpathway of thiamin diphosphate biosynthesis II	6.68255E-05	1.35369E-05	0.00017197	0	9.3204E-05	0	0.000125088	0	0.000158313	0	0.000217401	0	0.000162663	0
PWY-6897: thiamin salvage II	0.000314285	0.000312625	0.000236919	0.000224662	0.000301046	0.000477324	0.000269803	0.000199662	0.000160888	0.000243393	0.000247234	0.000362372	0.000165337	0.00030816
PWY-6901: superpathway of glucose and xylose degradation	7.70397E-05	4.47576E-05	0.000150847	3.98864E-05	7.89998E-05	1.87778E-05	6.99082E-05	2.33553E-05	0.000150006	7.64436E-05	0.000177272	3.59137E-05	8.77676E-05	5.1207E-05
PWY-6936: seleno-amino acid biosynthesis	0.000125604	0.000126665	8.16493E-05	2.4242E-05	0.000143579	7.52845E-05	0.000187233	0.000182477	0.000104229	0.000112155	0.000147518	4.85351E-05	9.53873E-05	0.000145363
PWY-6969: TCA cycle V (2-oxoglutarate:ferredoxin oxidoreductase)	0.000118039	6.07016E-05	9.64138E-05	1.66309E-05	0.000107891	4.16732E-05	7.37829E-05	4.77719E-05	0.000116175	5.52281E-05	0.000177756	0.08476	9.76237E-05	1.89618E-05
PWY-7003: glycerol degradation to butanol	4.56746E-05	4.5568E-05	6.05477E-05	1.45868E-05	5.9673E-06	1.34617E-06	6.52552E-06	8.00252E-06	6.5394E-05	5.52682E-05	1.60249E-05	7.07408E-06	8.46357E-06	2.29288E-05
PWY-7007: methyl ketone biosynthesis	0	0	0	0	0	0	9.7095E-06	2.1435E-05	0	0	0	0	0	0
PWY-7013: L-1,2-propanediol degradation	2.47587E-06	0	2.44262E-05	6.54789E-07	5.26983E-05	0	5.54606E-05	0	2.30083E-05	0	7.58236E-05	0	2.26959E-06	0
PWY-7039: phosphatidate metabolism, as a signaling molecule	7.72779E-06	5.45841E-07	4.74032E-06	0	0	0	0	0	1.13717E-06	0	7.24113E-05	0	0	0
PWY-7094: fatty acid salvage	0	0	0	0	0	0	0	0	0	0	1.20612E-06	0	0	0
PWY-7111: pyruvate fermentation to isobutanol (engineered)	0.000582527	0.000923782	0.000419267	0.000641166	0.000537434	0.000575303	0.000574662	0.000544468	0.000427124	0.000656932	0.000428572	0.000540875	0.000463373	0.000562385
PWY-7115: C4 photosynthetic carbon assimilation cycle, NAD-ME type	7.01666E-06	9.91412E-06	3.12547E-06	0	4.98743E-05	0	0	0	3.03075E-05	1.16263E-05	1.91026E-05	0	4.18728E-06	2.39191E-05
PWY-7117: C4 photosynthetic carbon assimilation cycle, PEPCK type	5.20605E-06	7.72729E-06	2.12503E-06	0	0.000123601	1.84882E-06	0	0	2.25756E-05	1.86233E-05	2.22931E-05	0	2.86792E-06	3.59755E-05
PWY-7184: pyrimidine deoxyribonucleotides de novo biosynthesis I	0.0002362	0.000219278	0.000224117	0.000221507	0.00019987	0.000195801	0.000244062	0.000284999	0.000233392	0.000175057	0.000359666	0.00020658	0.000208581	0.000195758
PWY-7187: pyrimidine deoxyribonucleotides de novo biosynthesis II	0.000304704	0.000260336	0.000184577	0.000223595	0.000265036	0.000238546	0.000363028	0.000372653	0.000255776	0.000297939	0.000319486	0.000213772	0.000278242	0.000208012
PWY-7196: superpathway of pyrimidine ribonucleosides salvage	0.00015765	0.000256609	0.000120846	0.000137273	0.000137306	7.34837E-05	0.000154501	0.000106273	8.06142E-05	0.0002286	0.000206827	0.000221994	6.37193E-05	0.00010226
PWY-7197: pyrimidine deoxyribonucleotide phosphorylation	0.000179143	0.00015893	0.000167374	0.000130713	0.000169764	0.000167211	0.000203935	0.000233442	0.000187755	0.000181349	0.000267245	0.000171332	0.000163461	0.000138642
PWY-7198: pyrimidine deoxyribonucleotides de novo biosynthesis IV	1.20864E-05	3.00248E-05	7.03914E-06	4.25959E-05	1.48863E-05	5.08917E-06	1.91646E-05	3.09896E-05	2.69408E-05	2.92119E-05	8.56727E-05	5.69932E-05	3.51507E-06	1.07528E-06
PWY-7199: pyrimidine deoxyribonucleosides salvage	0.000152639	8.75804E-05	0.000181536	6.2309E-05	0.000201267	0.000212085	0.000149993	0.00014138	0.000154193	0.000151642	0.000203317	9.40434E-05	0.000138027	0.000133146
PWY-7200: superpathway of pyrimidine deoxyribonucleoside salvage	0	0	0	0	0	0	0	0	0	0	0.000256436	0	0	0
PWY-7204: pyridoxal 5'-phosphate salvage II (plants)	2.61532E-05	3.23675E-06	8.50621E-05	0	4.33648E-05	0	2.40712E-05	0	7.71582E-05	0	0.000103637	0	9.54486E-05	0
PWY-7208: superpathway of pyrimidine nucleobases salvage	0.000266338	0.000388712	0.000287004	0.000327213	0.000244469	0.000247947	0.000289976	0.00035284	0.000263528	0.000253274	0.00037324	0.000301364	0.000226846	0.000286605
PWY-7209: superpathway of pyrimidine ribonucleosides degradation	2.15761E-07	0	0	2.6197E-06	5.98471E-06	8.21836E-07	2.28069E-07	9.72868E-07	3.91816E-06	5.52888E-06	6.21301E-07	1.58238E-06	0	1.21988E-07
PWY-7210: pyrimidine deoxyribonucleotides biosynthesis from CTP	1.67704E-05	3.97588E-05	9.88201E-06	5.41883E-05	2.03544E-05	7.15682E-06	2.62174E-05	4.15813E-05	3.62106E-05	3.82043E-05	0.000109781	7.03689E-05	4.97153E-06	1.53099E-06
PWY-7211: superpathway of pyrimidine deoxyribonucleotides de novo biosynthesis	0.000140277	0.000228572	0.000140231	0.000135024	0.000148597	8.92462E-05	0.000176339	0.000123766	0.000103925	0.000191022	0.000245346	0.000130214	8.38855E-05	0.000115012
PWY-7219: adenosine ribonucleotides de novo biosynthesis	0.00103827	0.00122476	0.000624881	0.00104608	0.000838478	0.00154795	0.00115557	0.00116195	0.000670179	0.000963948	0.000590244	0.00114613	0.000798911	0.000853254
PWY-7220: adenosine deoxyribonucleotides de novo biosynthesis II	0.000334973	0.000310187	0.000242456	0.000299742	0.000185804	0.000164457	0.000284713	0.000318691	0.000252244	0.000157654	0.000444454	0.000182968	0.000255752	0.000213538
PWY-7221: guanosine ribonucleotides de novo biosynthesis	0.000731073	0.00087051	0.000465419	0.000859555	0.000565354	0.001103	0.000797463	0.000818639	0.000501767	0.0006871	0.000444815	0.000856672	0.000642082	0.000557119
PWY-7222: guanosine deoxyribonucleotides de novo biosynthesis II	0.000334973	0.000310187	0.000242456	0.000299742	0.000185804	0.000164457	0.000284713	0.000318691	0.000252244	0.000157654	0.000444454	0.000182968	0.000255752	0.000213538
PWY-7228: superpathway of guanosine nucleotides de novo biosynthesis I	0.000311277	0.000359227	0.000322924	0.000448676	0.000254176	0.000300743	0.000312605	0.000375679	0.000295408	0.000252973	0.00044832	0.000346691	0.000271944	0.000310297
PWY-7229: superpathway of adenosine nucleotides de novo biosynthesis I	0.000611456	0.000633358	0.0004115	0.000608316	0.000396377	0.000412849	0.000607385	0.000643523	0.000442656	0.000407398	0.000546761	0.00042723	0.000476316	0.000425968
PWY-7234: inosine-5'-phosphate biosynthesis III	8.80511E-05	5.1042E-05	9.45009E-05	4.62295E-05	8.76098E-05	7.34219E-05	0.000104845	7.23586E-05	0.000131679	9.66258E-05	0.000133963	5.34921E-05	0.000113829	6.69678E-05
PWY-7235: superpathway of ubiquinol-6 biosynthesis (eukaryotic)	4.8695E-07	3.14186E-06	0	0	0	0	3.38639E-07	0	7.87213E-06	0	1.59891E-06	2.14733E-07	4.51905E-06	2.10178E-06
PWY-7237: myo-, chiro- and scillo-inositol degradation	1.83846E-05	0.000374731	5.76025E-06	2.13973E-05	9.58309E-05	7.22959E-05	8.50722E-05	9.81792E-05	3.0655E-05	2.55205E-05	8.69626E-05	8.19842E-05	1.66032E-05	1.20966E-05
PWY-7242: D-fructuronate degradation	0.000154358	9.58264E-05	7.80974E-05	0.000114755	9.27921E-05	4.22585E-05	0.000131872	7.34324E-05	0.000107714	0.000127723	9.28977E-05	8.3514E-05	0.000109444	0.000142187
PWY-724: superpathway of L-lysine, L-threonine and L-methionine biosynthesis II	0.000470336	0.000508036	0.000261296	0.000271655	0.000392415	0.0003692	0.000441616	0.000384641	0.000308018	0.000454847	0.000291865	0.000399448	0.000329075	0.000441457
PWY-7254: TCA cycle VII (acetate-producers)	1.43005E-05	2.91598E-06	3.99906E-05	2.31922E-07	2.35582E-05	0	5.67938E-06	6.37411E-07	6.01932E-05	8.60309E-07	8.28219E-05	2.6E-06	3.88301E-05	0
PWY-7269: NAD/NADP-NADH/NADPH mitochondrial interconversion (yeast)	1.29085E-05	2.18943E-06	5.00041E-05	0	2.00076E-05	0	7.20414E-06	0	7.1057E-05	0	9.91204E-05	0	4.15108E-05	0
PWY-7270: L-methionine salvage cycle II (plants)	0	0	0	0	0	0	0	0	0	0	0	0	0	0
PWY-7279: aerobic respiration II (cytochrome c) (yeast)	0	2.3678E-06	3.13804E-05	0	1.91045E-06	0	8.56741E-06	0	2.95708E-07	0	4.84138E-06	0	9.04765E-06	0
PWY-7282: 4-amino-2-methyl-5-phosphomethylpyrimidine biosynthesis (yeast)	0.000144586	0.000297579	0.000192454	0.000227206	0.000202614	0.000105531	0.00013288	5.50793E-05	0.000106595	0.00023036	0.000158228	0.000192919	0.000142949	0.000284474
PWY-7286: 7-(3-amino-3-carboxypropyl)-wyosine biosynthesis	0	0	0	0	0	0	3.67947E-07	0	3.19196E-06	4.02015E-06	0	0	1.5078E-07	0
PWY-7290: Escherichia coli serotype O86 O-antigen biosynthesis	9.82008E-07	4.92202E-07	0	0	0	0	0	0	0	0	0	0	0	0
PWY-7294: xylose degradation IV	5.94508E-06	0	0	0	0	0	0	0	0	0	9.68435E-06	0	0	0
PWY-7315: dTDP-N-acetylthomosamine biosynthesis	5.55975E-06	1.27353E-06	4.94567E-05	2.08053E-07	1.66966E-05	0	4.71407E-06	0	7.27512E-05	0	8.72537E-05	0	4.90244E-05	0
PWY-7323: superpathway of GDP-mannose-derived O-antigen building blocks biosynthesis	2.81556E-05	1.04002E-05	6.98255E-05	7.2466E-05	7.80518E-05	9.35522E-05	7.1793E-05	3.87779E-05	2.8941E-05	3.29315E-05	8.06225E-05	1.71055E-05	5.05188E-05	3.03002E-05
PWY-7328: superpathway of UDP-glucose-derived O-antigen building blocks biosynthesis	1.59935E-05	1.19542E-06	3.23822E-05	9.53147E-06	1.85896E-05	5.14097E-06	1.93861E-05	3.75096E-05	4.59953E-05	7.61347E-06	6.04167E-05	5.16669E-06	4.58952E-05	7.22825E-06
PWY-7345: superpathway of anaerobic sucrose degradation	0	0	0	0	0	0	0	0	0	0	2.28003E-05	0	0	0
PWY-7357: thiamin formation from pyrithiamine and oxythiamine (yeast)	0.000341648	0.000437427	0.000231525	0.000178277	0.000365427	0.000451805	0.000362424	0.000207367	0.000146078	0.000288042	0.000247716	0.000350732	0.000137241	0.00028788
PWY-7371: 1,4-dihydroxy-6-naphthoate biosynthesis II	1.68629E-07	1.51448E-06	0	9.23927E-08	5.68192E-05	6.56387E-05	1.25087E-06	3.51802E-05	1.45184E-05	0	3.89679E-05	2.7134E-05	8.21079E-06	1.96502E-06
PWY-7374: 1,4-dihydroxy-6-naphthoate biosynthesis I	0	0	0	0	0	0	0	0	5.51581E-06	0	0	0	0	0
PWY-7383: anaerobic energy metabolism (invertebrates, cytosol)	0.000150187	0.000157356	0.000111024	8.60838E-06	0.000159424	6.22491E-05	0.000124395	0.000111141	0.000154045	0.000215757	5.1567E-05	6.57802E-05	5.45096E-05	2.17567E-05
PWY-7384: anaerobic energy metabolism (invertebrates, mitochondrial)	0	0	0	0	0	0	0	0	0	3.66671E-07	0	0	0	0
PWY-7388: octanoyl-[acyl-carrier protein] biosynthesis (mitochondria, yeast)	2.63717E-05	1.17289E-05	6.67072E-05	8.90644E-06	5.01907E-05	6.40013E-06	2.85725E-05	7.72163E-06	6.59714E-05	2.34574E-06	0.00011613	6.02532E-06	9.17589E-05	4.28893E-06
PWY-7389: superpathway of anaerobic energy metabolism (invertebrates)	0	0	0	0	0	0	0	0	0	6.21623E-07	0	0	0	0
PWY-7391: isoprene biosynthesis II (engineered)	2.07072E-07	0	0	0	0	0	0	0	0	4.94864E-07	0	0	4.64332E-07	0
PWY-7392: taxadiene biosynthesis (engineered)	2.12715E-05	4.22006E-06	2.94197E-06	1.81454E-06	3.82551E-05	0	2.22166E-06	1.92649E-06	3.01253E-05	8.9777E-06	5.78645E-06	0	7.12461E-06	0
PWY-7399: methylphosphonate degradation II	0	5.60681E-07	0	0	0	0	0	0	0	0	0	0	0	0
PWY-7400: L-arginine biosynthesis IV (archaebacteria)	0.000304594	0.000181024	0.000292307	0.000119478	0.000261255	9.97745E-05	0.000304799	0.00019584	0.000318178	0.00025984	0.000329606	0.000136218	0.000253157	4.88375E-05
PWY-7409: phospholipid remodeling (phosphatidylethanolamine, yeast)	7.99206E-06	3.22886E-07	2.82634E-05	0	1.3443E-05	0	1.76468E-06	0	1.49836E-05	0	6.95773E-05	0	2.97999E-05	0
PWY-7446: sulfoglycolysis	4.56219E-06	2.21088E-07	2.73817E-05	1.75818E-07	1.18565E-05	0	2.45334E-06	0	4.53622E-05	0	5.91913E-05	0	0	0
PWY-7456: mannan degradation	0.000152786	5.13711E-05	5.28302E-05	2.68145E-06	0.000135126	0.000171122	4.43741E-05	7.6269E-05	5.34921E-05	0.000176525	5.26175E-05	6.46458E-05	0.000100682	2.1532E-05
PWY-7527: L-methionine salvage cycle III	0	0	0	0	0	0	0	0	1.37905E-06	0	6.05283E-06	0	0	0
PWY-7528: L-methionine salvage cycle I (bacteria and plants)	0	0	0	0	0	0	0	0	0	0	0	0	0	0
PWY-7539: 6-hydroxymethyl-dihydropterin diphosphate biosynthesis III (Chlamydia)	5.29091E-05	3.63567E-05	7.8699E-05	7.75809E-05	8.06965E-05	7.45696E-05	3.4984E-05	4.21739E-05	6.17408E-05	2.7762E-05	0.000100804	2.99806E-05	3.11923E-05	7.30903E-05
PWY-7560: methylerythritol phosphate pathway II	0.000127078	6.67225E-05	0.000181784	3.57176E-06	0.000168744	0.000192283	0.000119069	6.12516E-05	0.000177833	3.36491E-05	0.000225956	2.68672E-05	0.000185304	7.85631E-05
PWY-7663: gondoate biosynthesis (anaerobic)	0.000376681	0.000267978	0.00026999	0.000660244	0.000307276	0.00037691	0.000296056	0.000287118	0.000188532	0.00027773	0.000218648	0.000329137	0.000310891	0.000434164
PWY-7664: oleate biosynthesis IV (anaerobic)	3.8152E-05	0.01722	8.88673E-05	1.33164E-05	6.97766E-05	9.60723E-06	4.08306E-05	1.14989E-05	8.5251E-05	3.34297E-06	0.000138151	8.97395E-06	0.000124502	6.40637E-06
PWY-821: superpathway of sulfur amino acid biosynthesis (Saccharomyces cerevisiae)	2.50535E-05	6.56302E-06	4.46873E-05	1.33167E-06	3.64453E-05	0	1.5096E-05	1.8438E-06	7.01534E-05	1.83533E-07	6.91532E-05	8.2187E-07	5.56913E-05	0
PWY-841: superpathway of purine nucleotides de novo biosynthesis I	0.000355021	0.000392806	0.000280778	0.000493764	0.000270338	0.000275211	0.000360892	0.000389141	0.000265866	0.000284014	0.000290097	0.000203518	0.000307963	0.000243602
PWY-922: mevalonate pathway I	1.45456E-06	0	4.70474E-06	0	2.59582E-06	0	2.75226E-07	0	0	5.96066E-07	1.38969E-05	0	5.9195E-07	2.07765E-07
PWY0-1061: superpathway of L-alanine biosynthesis	4.73533E-05	4.67652E-05	0.000105703	5.51626E-06	5.89582E-05	0	5.80155E-05	3.6757E-05	0.000137077	1.48216E-05	0.000169856	4.01953E-06	0.000101271	3.09299E-05
PWY0-1241: ADP-L-glycero-&beta;-D-manno-heptose biosynthesis	1.21919E-05	2.33438E-06	3.28184E-05	0	1.6458E-05	0	1.46636E-05	7.36325E-07	4.3286E-05	4.36654E-07	8.7558E-05	2.0799E-07	2.60625E-05	0
PWY0-1261: anhydromuropeptides recycling	6.55138E-05	1.74642E-05	0.00013073	1.13034E-05	6.36347E-05	5.48913E-06	4.91249E-05	8.10627E-06	0.00012954	5.38224E-05	0.000215921	2.96528E-05	8.59653E-05	2.25156E-06
PWY0-1277: 3-phenylpropanoate and 3-(3-hydroxyphenyl)propanoate degradation	6.94156E-06	8.08035E-07	4.49042E-05	0	0.01128	0	1.54721E-05	0	3.26127E-05	0	4.55732E-05	0	3.58279E-07	0
PWY0-1296: purine ribonucleosides degradation	0.000400946	0.000348319	0.00027228	0.000190075	0.000327087	0.000242298	0.000423544	0.000501559	0.000375292	0.000492189	0.000310463	0.000338425	0.000120292	0.000313001
PWY0-1297: superpathway of purine deoxyribonucleosides degradation	5.94477E-05	3.59306E-05	0.000124457	3.09782E-05	4.83669E-05	9.95497E-06	9.47071E-05	4.3331E-05	0.000161561	4.68604E-05	0.000184162	3.32088E-05	5.56955E-05	2.41064E-05
PWY0-1298: superpathway of pyrimidine deoxyribonucleosides degradation	4.19656E-05	4.45578E-05	8.42528E-05	1.85122E-05	4.32339E-05	1.04613E-05	3.03659E-05	4.74233E-05	9.30263E-05	3.45279E-05	8.88995E-05	2.19321E-05	9.94777E-06	2.00199E-05
PWY0-1319: CDP-diacylglycerol biosynthesis II	0.000573876	0.000606416	0.000332891	0.000780811	0.000441021	0.000484404	0.000472415	0.000444218	0.000321912	0.000532441	0.000336989	0.000536948	0.000581527	0.000603358
PWY0-1338: polymyxin resistance	3.70664E-06	3.51883E-07	1.70782E-05	8.00532E-08	7.36063E-06	0	2.5496E-06	0	2.66652E-05	1.15483E-07	3.92447E-05	0	1.16502E-05	0
PWY0-1415: superpathway of heme biosynthesis from uroporphyrinogen-III	7.34714E-06	3.13087E-06	3.43699E-05	6.17382E-07	1.81363E-05	0	1.28906E-05	0	8.76347E-06	0	7.45921E-05	0	2.46896E-05	0
PWY0-1479: tRNA processing	2.53181E-05	3.44297E-07	7.11366E-06	2.66884E-05	1.75042E-05	2.98978E-05	3.40654E-07	7.61042E-07	4.16248E-06	1.50523E-05	1.11995E-05	3.05005E-05	0.00010709	4.33667E-05
PWY0-1533: methylphosphonate degradation I	6.9529E-06	2.95944E-07	2.88021E-05	0	1.28098E-05	0	2.93794E-06	0	4.24441E-05	0	5.84071E-05	0	2.42325E-05	0
PWY0-1586: peptidoglycan maturation (meso-diaminopimelate containing)	0.000230243	0.000110286	0.000156014	0.00010436	0.000206466	0.000100261	0.000230164	9.02113E-05	0.000181872	0.000196807	0.000284786	7.80091E-05	0.000109102	0.000169929
PWY0-162: superpathway of pyrimidine ribonucleotides de novo biosynthesis	0.000161032	0.000446375	0.000206621	0.000130014	0.00019362	0.000202839	0.000248416	0.000171854	0.000237704	0.000297952	0.000224653	0.00027615	0.000229323	0.00016407
PWY0-166: superpathway of pyrimidine deoxyribonucleotides de novo biosynthesis (E. coli)	0.000301162	0.000254744	0.000245561	0.000246561	0.000256363	0.000237012	0.000340171	0.000355916	0.000264159	0.000262374	0.000349964	0.000240936	0.000269617	0.000223959
PWY0-321: phenylacetate degradation I (aerobic)	1.42652E-06	0	1.92282E-05	0	8.13817E-06	0	1.43509E-06	0	3.32039E-05	0	3.35954E-05	0	0	0
PWY0-41: allantoin degradation IV (anaerobic)	2.98605E-06	0	2.10642E-06	0	3.52882E-06	0	0	0	0	0	4.56578E-06	0	1.07627E-06	0
PWY0-42: 2-methylcitrate cycle I	3.76432E-06	5.01052E-07	4.75805E-06	0	9.41638E-07	0	1.85814E-06	0	7.87811E-06	0	2.66494E-05	0	2.39721E-05	0
PWY0-781: aspartate superpathway	9.59577E-05	4.16139E-05	0.000100978	4.77628E-05	8.48247E-05	2.05719E-05	8.33351E-05	4.7431E-05	0.000130559	0.000124221	0.000172057	4.2058E-05	0.000103946	2.56382E-05
PWY0-845: superpathway of pyridoxal 5'-phosphate biosynthesis and salvage	7.55339E-05	0.000216682	0.00018219	0.000214877	0.00012026	5.00542E-05	6.85103E-05	2.67453E-05	7.8524E-05	0.000169371	0.000108955	0.00013006	0.00018938	0.000311854
PWY0-862: (5Z)-dodec-5-enoate biosynthesis	3.32388E-05	1.49111E-05	8.01778E-05	1.14467E-05	6.20835E-05	8.26479E-06	3.57824E-05	9.91678E-06	8.03169E-05	2.87046E-06	0.000131331	7.72203E-06	0.000113451	5.50335E-06
PWY1F-823: leucopelargonidin and leucocyanidin biosynthesis	0	0	0	0	0	0	0	0	0	0	1.01427E-07	0	0	0
PWY490-3: nitrate reduction VI (assimilatory)	9.4775E-06	1.30826E-05	5.97427E-06	9.69351E-06	3.9234E-06	0	1.20144E-05	3.07476E-07	6.28545E-06	1.17905E-05	0	1.40104E-06	3.3327E-06	1.10952E-05
PWY4FS-7: phosphatidylglycerol biosynthesis I (plastidic)	0.0001491	4.85863E-05	0.000181648	0.000101019	0.000125707	5.61687E-05	0.00022697	0.000163257	0.000197597	6.27138E-05	0.000147548	4.07128E-05	0.000175394	0.000102683
PWY4FS-8: phosphatidylglycerol biosynthesis II (non-plastidic)	0.0001491	4.85863E-05	0.000181633	0.000101019	0.000125707	5.61687E-05	0.000226941	0.000163257	0.000197597	6.27138E-05	0.00014749	4.07128E-05	0.000175394	0.000102683
PWY4LZ-257: superpathway of fermentation (Chlamydomonas reinhardtii)	4.73039E-05	2.90223E-05	7.6166E-05	8.30149E-06	3.6977E-05	6.85991E-06	4.68115E-05	3.47882E-05	0.000112505	2.94859E-05	1.73779E-05	1.72686E-05	1.06824E-05	1.71676E-05
PWY66-389: phytol degradation	1.64709E-07	3.31727E-07	2.93882E-06	0	5.08813E-07	0	0	0	1.73776E-07	0	7.59406E-06	0	0	0
PWY66-398: TCA cycle III (animals)	2.09356E-06	4.74913E-05	2.95852E-05	0	2.91616E-05	0	3.85707E-05	2.46911E-06	2.98935E-05	6.9214E-06	6.21639E-05	0	1.33482E-06	0
PWY66-399: gluconeogenesis III	9.97741E-05	7.54196E-05	0.000134334	1.91652E-05	9.95172E-05	3.08115E-05	0.000124698	0.000148488	0.000160487	0.000171985	7.26646E-05	5.68116E-05	7.48037E-05	4.77629E-05
PWY66-400: glycolysis VI (metazoan)	0.000107584	5.81723E-05	0.000172463	4.24876E-05	0.000101285	2.57479E-05	0.000150654	0.000337988	0.000273626	0.000226722	0.000248097	0.000143302	0.000165379	0.000164794
PWY66-409: superpathway of purine nucleotide salvage	0.000132663	8.07389E-05	0.000182581	8.66045E-05	0.000108741	1.53717E-05	0.000121268	9.24633E-05	0.000193121	0.000101248	0.00028222	0.08017	0.000125545	4.33399E-05
PWY66-422: D-galactose degradation V (Leloir pathway)	0.000300584	0.000282613	0.000190652	0.000159466	0.000274594	0.000165659	0.000312439	0.000295516	0.000183499	0.000347717	0.000172602	0.000208642	0.000206021	0.000260887
PWYG-321: mycolate biosynthesis	3.9315E-05	1.77791E-05	8.80588E-05	1.37965E-05	7.10088E-05	9.92634E-06	4.19876E-05	1.19006E-05	8.52591E-05	3.47266E-06	0.000135125	9.27845E-06	0.000121038	6.64327E-06
PYRIDNUCSAL-PWY: NAD salvage pathway I	4.76128E-05	3.23631E-06	5.68455E-05	2.35005E-06	4.10545E-05	0	1.06766E-05	3.74043E-05	8.86643E-05	3.19863E-05	8.59335E-05	7.33083E-06	5.87648E-05	0
PYRIDNUCSYN-PWY: NAD biosynthesis I (from aspartate)	0.000287837	0.000216613	0.000171238	0.000261074	0.000172149	0.000218013	0.000221981	0.000201797	0.000183628	0.000238428	0.000204322	0.000204017	0.000288934	0.000105306
PYRIDOXSYN-PWY: pyridoxal 5'-phosphate biosynthesis I	5.77223E-05	0.000169913	0.000169526	0.000258857	9.31515E-05	3.86134E-05	5.27901E-05	2.11216E-05	9.05144E-05	0.000135557	0.000114768	0.000100679	0.000159689	0.000334068
REDCITCYC: TCA cycle VIII (helicobacter)	2.10907E-05	6.68882E-06	3.92317E-05	2.67938E-07	2.00952E-05	0	1.93972E-05	2.26668E-06	5.70644E-05	9.98882E-07	8.20254E-05	2.29675E-06	4.11206E-05	0
RHAMCAT-PWY: L-rhamnose degradation I	0.000129071	0.000140593	0.000194976	0.000258124	9.36202E-05	6.73464E-05	6.67667E-05	3.61739E-05	0.000112512	0.000128139	0.000153515	0.000242989	8.56686E-05	0.000159301
RIBOSYN2-PWY: flavin biosynthesis I (bacteria and plants)	0.000200351	4.42435E-05	0.000164114	0.000246139	0.000125437	1.54603E-05	0.000161073	0.000171459	0.000171116	9.84562E-05	0.000167342	2.95628E-05	0.000325707	2.73273E-05
RUMP-PWY: formaldehyde oxidation I	1.2152E-06	0	0	0	0	0	0	0	0	4.11045E-06	0	0	0	0
SALVADEHYPOX-PWY: adenosine nucleotides degradation II	0.000201571	0.000175688	0.000130041	5.92498E-05	0.000172431	4.50143E-05	0.000212589	0.000142342	0.000244721	0.000180075	0.00014826	8.34855E-05	7.48995E-05	7.63888E-05
SER-GLYSYN-PWY: superpathway of L-serine and glycine biosynthesis I	0.000251289	0.000132329	0.000180539	0.000176709	0.000215133	0.000205952	0.000219534	0.000191995	0.000140242	0.000261159	0.0001561	8.41345E-05	0.000164602	0.000184802
SO4ASSIM-PWY: sulfate reduction I (assimilatory)	2.45102E-05	1.52279E-05	9.22718E-05	7.00226E-06	5.99948E-05	5.50843E-06	6.65851E-05	5.85138E-06	9.54924E-05	3.65657E-05	0.000158078	5.93297E-06	0.000117547	4.18657E-06
SULFATE-CYS-PWY: superpathway of sulfate assimilation and cysteine biosynthesis	4.92976E-05	3.01609E-05	9.90885E-05	1.39436E-05	8.83737E-05	1.16663E-05	0.000101847	1.25782E-05	0.000112388	6.67531E-05	0.000144316	1.23973E-05	0.000132243	8.95915E-06
TCA-GLYOX-BYPASS: superpathway of glyoxylate bypass and TCA	2.71034E-05	6.18516E-06	0.05857	3.7733E-07	3.36258E-05	0	1.07587E-05	0	8.21544E-05	3.57924E-07	0.000122362	0	6.19722E-05	0
TCA: TCA cycle I (prokaryotic)	0.000103317	6.94021E-05	0.000107463	1.9663E-05	0.00012606	4.86713E-05	8.41761E-05	5.44937E-05	0.000121527	6.27447E-05	0.000174163	9.19981E-05	0.000112306	2.2371E-05
TEICHOICACID-PWY: teichoic acid (poly-glycerol) biosynthesis	8.48063E-07	0	0	0	1.83337E-06	0	0	0	0	0	3.41175E-07	0	0	0
THISYN-PWY: superpathway of thiamin diphosphate biosynthesis I	0.000224893	0.000191711	0.000229216	0.000128371	0.000191183	8.1617E-05	0.000212014	0.000188057	0.000198717	0.000198385	0.000236395	0.000137545	0.000207429	0.000140969
THISYNARA-PWY: superpathway of thiamin diphosphate biosynthesis III (eukaryotes)	0.000125429	9.7334E-05	0.000172685	0.000139751	0.00011272	0.000136455	0.000102675	4.72217E-05	0.000107973	0.000187518	0.000187061	0.000166958	6.32045E-05	0.000162145
THRESYN-PWY: superpathway of L-threonine biosynthesis	0.000319809	0.000216655	0.000199223	0.000184572	0.000266842	0.000174339	0.000254063	0.000234047	0.000219727	0.000334719	0.000257629	0.000194017	0.000240476	0.000236665
TRNA-CHARGING-PWY: tRNA charging	0.000577427	0.000765393	0.000287481	0.000607835	0.000498653	0.000360409	0.000764508	0.000812724	0.000484796	0.000617063	0.000223293	0.000328633	0.000456809	0.000311827
TRPSYN-PWY: L-tryptophan biosynthesis	0.000278317	0.000153003	0.000173048	0.000251358	0.000179284	0.000206313	0.000170623	0.000156219	0.000114088	0.000137532	0.000252866	0.0002135	0.00029293	0.000139579
TYRFUMCAT-PWY: L-tyrosine degradation I	0	0	0	0	0	0	0	0	0	1.22364E-07	0	0	0	0
UBISYN-PWY: superpathway of ubiquinol-8 biosynthesis (prokaryotic)	6.55309E-06	2.10569E-06	2.49858E-05	0	1.50116E-05	0	1.34897E-05	0	4.00976E-05	0	7.06876E-05	0	2.58173E-05	0
UDPNAGSYN-PWY: UDP-N-acetyl-D-glucosamine biosynthesis I	8.93125E-05	8.39899E-06	0.000101342	4.56741E-06	4.30944E-05	4.84237E-06	5.1854E-05	7.54179E-06	9.70779E-05	2.60409E-05	0.000166426	1.92473E-05	6.55259E-05	8.17415E-07
UNINTEGRATED	0.378613	0.397637	0.609624	0.455986	0.424492	0.516211	0.267593	0.220238	0.427437	0.379427	0.619509	0.558792	0.3551	0.633042
UNMAPPED	0.572276	0.555575	0.348383	0.497599	0.532014	0.444775	0.683966	0.737806	0.530104	0.577082	0.329424	0.40307	0.600305	0.329047
URDEGR-PWY: superpathway of allantoin degradation in plants	4.94995E-06	5.1844E-07	1.47293E-06	0	2.77031E-06	0	0	0	0	0	0	0	7.62658E-07	0
VALSYN-PWY: L-valine biosynthesis	0.000582527	0.000923782	0.000419267	0.000641166	0.000537434	0.000474339	0.000574662	0.000544468	0.000427124	0.000656932	0.000428572	0.000540875	0.000463373	0.000562385

## Sheet: Unstratified Tremaroli 2015
Table S3e: Metagenomic unstratified relative abundance resulting for the data generated from Tremaroli et al., 2015.
# Pathway	GB1	GB2	GB3	GB4	GB5	GB6	GB7	Obese1	Obese2	Obese3	Obese4	Obese5	Obese6	Obese7
1CMET2-PWY: N10-formyl-tetrahydrofolate biosynthesis	0.000171103	0.00018785	0.000227311	0.000406684	0.000304171	0.000247002	0.000208242	0.000423396	0.000370144	0.000196736	0.000309298	0.000294125	0.000389286	0.000235415
3-HYDROXYPHENYLACETATE-DEGRADATION-PWY: 4-hydroxyphenylacetate degradation	6.81845E-05	0	0	5.15891E-07	0	2.86261E-06	6.71467E-06	0	0	0	0	0	0	0
7ALPHADEHYDROX-PWY: cholate degradation (bacteria, anaerobic)	0	0	0	0	0	0	0	0	4.65318E-07	0	0	0	0	0
AEROBACTINSYN-PWY: aerobactin biosynthesis	7.27931E-05	0	5.30202E-05	0	0	1.35659E-05	3.84703E-06	9.2246E-07	0	0	0	0	0	0
ALL-CHORISMATE-PWY: superpathway of chorismate metabolism	8.85283E-06	0	5.78154E-05	5.37597E-06	0	0	0	0	0	0	0	0	0	0
ALLANTOINDEG-PWY: superpathway of allantoin degradation in yeast	1.26504E-07	1.52956E-07	2.49179E-07	0	6.77074E-07	7.41049E-07	0	0	0	0	0	0	0	0
ANAEROFRUCAT-PWY: homolactic fermentation	0.000219629	0.000206028	0.000224494	0.000185497	0.000226428	0.000210092	0.00019552	7.73196E-05	0.0002676	7.1041E-05	0.000248196	0.00021574	8.51402E-05	0.000155095
ANAGLYCOLYSIS-PWY: glycolysis III (from glucose)	0.000249139	0.000346564	0.000313711	0.000387364	0.000321763	0.000338137	0.000339938	0.000305564	0.000493882	0.00037554	0.000330855	0.000430074	0.000428597	0.000372775
ARG+POLYAMINE-SYN: superpathway of arginine and polyamine biosynthesis	8.01881E-05	0.000108429	6.44891E-05	0.000102741	6.57924E-05	8.77081E-05	9.53354E-05	8.97738E-05	5.48994E-05	7.27486E-05	8.6139E-05	8.52836E-05	0.000127847	8.92788E-05
ARGDEG-PWY: superpathway of L-arginine, putrescine, and 4-aminobutanoate degradation	7.46287E-05	1.14343E-05	3.29735E-05	1.23009E-06	0	3.82092E-06	1.09871E-05	0	0	0	0	0	0	0
ARGININE-SYN4-PWY: L-ornithine de novo biosynthesis	2.89998E-05	5.06845E-05	0.000103995	0.000105254	0.00011646	6.30485E-05	3.61722E-05	5.65837E-05	0.000164224	1.3668E-05	9.62232E-05	8.29161E-05	0.000176192	1.05441E-05
ARGORNPROST-PWY: arginine, ornithine and proline interconversion	1.54815E-06	2.91937E-06	0	2.85475E-05	5.06099E-06	5.22627E-05	0	3.44407E-06	0	0	4.17972E-06	0	0	1.39056E-06
ARGSYN-PWY: L-arginine biosynthesis I (via L-ornithine)	0.000281113	0.000289413	0.000327408	0.000287953	0.000193177	0.0003062	0.000277843	0.000262145	0.00022714	0.000228456	0.000171053	0.000166884	0.000321488	0.000181951
ARGSYNBSUB-PWY: L-arginine biosynthesis II (acetyl cycle)	0.000272	0.000155585	0.000250172	0.000150952	5.60977E-05	0.000184132	0.000143594	0.000142098	0.00011469	0.000109466	7.26843E-05	7.58087E-05	0.000149033	7.92718E-05
ARO-PWY: chorismate biosynthesis I	0.000272322	0.000589797	0.000380983	0.000627452	0.000517891	0.00046736	0.000584678	0.000670169	0.00057748	0.000723827	0.000515185	0.000557023	0.000623778	0.000594051
ASPASN-PWY: superpathway of L-aspartate and L-asparagine biosynthesis	0.000221679	0.000151741	0.000217817	0.00016429	0.000133639	0.000176142	0.000131556	0.000117362	0.00011224	9.63946E-05	0.00010097	0.000127827	0.000158506	0.000165834
AST-PWY: L-arginine degradation II (AST pathway)	4.18965E-05	8.46433E-06	2.55606E-05	3.14724E-06	0	1.02206E-05	6.49627E-06	3.25997E-07	0	0	0	0	0	0
BIOTIN-BIOSYNTHESIS-PWY: biotin biosynthesis I	0.000108918	4.84146E-05	7.93575E-05	2.80057E-05	5.61203E-05	5.13558E-05	3.55619E-05	1.40866E-05	1.58203E-05	6.76088E-06	2.36667E-06	2.84555E-06	4.19207E-06	1.0331E-05
BRANCHED-CHAIN-AA-SYN-PWY: superpathway of branched amino acid biosynthesis	0.00021835	0.000422976	0.00030328	0.000392113	0.000387876	0.000397531	0.000388964	0.000302179	0.000319128	0.000422528	0.00042352	0.000363251	0.000390319	0.000525179
CALVIN-PWY: Calvin-Benson-Bassham cycle	0.000281988	0.000493648	0.000317838	0.000438674	0.0004178	0.000403384	0.000378842	0.000350678	0.000486903	0.00043827	0.000406429	0.000521589	0.000532831	0.000534683
CATECHOL-ORTHO-CLEAVAGE-PWY: catechol degradation to &beta;-ketoadipate	3.29977E-06	2.3625E-06	1.53735E-06	0	0	0	0	0	0	0	0	0	0	0
CENTFERM-PWY: pyruvate fermentation to butanoate	1.81466E-05	1.87691E-05	1.33966E-05	3.68209E-06	2.58636E-05	2.03008E-05	2.41864E-05	1.53656E-05	1.00929E-05	1.41386E-05	2.3534E-05	2.56492E-05	1.62186E-05	3.98003E-05
CITRULBIO-PWY: L-citrulline biosynthesis	2.41176E-05	1.99768E-05	7.46347E-06	0.000110423	4.43787E-05	2.86509E-05	2.30908E-05	2.37631E-05	5.04045E-05	8.36179E-06	3.46306E-05	1.03245E-05	2.83164E-05	1.49739E-05
COA-PWY-1: coenzyme A biosynthesis II (mammalian)	0.000308289	0.000481809	0.000372777	0.000572311	0.000559654	0.000419368	0.000536628	0.0005744	0.000573849	0.000634287	0.000563907	0.000516087	0.000583302	0.000619886
COA-PWY: coenzyme A biosynthesis I	0.000137054	0.000177177	0.000121815	0.00011732	0.000112863	0.000152184	0.000140175	0.000124863	0.000287679	0.000199236	0.000191525	0.000176159	0.000233421	0.000187947
COBALSYN-PWY: adenosylcobalamin salvage from cobinamide I	0.000118369	0.000150162	0.000110436	0.000241877	8.86359E-05	0.000104157	0.000128596	0.000194156	0.000111059	0.00020487	8.55903E-05	0.000182442	0.000219855	0.0002449
COLANSYN-PWY: colanic acid building blocks biosynthesis	0.000102391	4.85718E-05	8.79684E-05	4.52152E-05	2.0451E-05	5.81314E-05	5.03627E-05	3.99699E-05	0.000115767	2.30087E-05	3.33023E-05	4.87021E-05	2.9779E-05	1.38464E-05
COMPLETE-ARO-PWY: superpathway of aromatic amino acid biosynthesis	0.000251944	0.000552155	0.000349736	0.00060535	0.000494912	0.000444153	0.000578601	0.000659481	0.000564279	0.000716905	0.000496586	0.000525968	0.000606628	0.000561598
CRNFORCAT-PWY: creatinine degradation I	1.53197E-05	1.10803E-05	1.61596E-05	0	4.03748E-05	1.24083E-05	1.38622E-05	0	0	5.43512E-06	1.03187E-05	8.87649E-06	8.5608E-06	1.04693E-05
DAPLYSINESYN-PWY: L-lysine biosynthesis I	0.000122427	7.6572E-05	0.000162698	5.77771E-05	2.91781E-05	9.81194E-05	7.29395E-05	6.43242E-05	3.36807E-05	1.57106E-05	0.04987	4.65102E-05	3.37562E-05	3.69038E-05
DENOVOPURINE2-PWY: superpathway of purine nucleotides de novo biosynthesis II	0.000161057	0.000296447	0.000172444	0.000193821	0.000296084	0.000301702	0.000226725	0.000202363	0.000217485	0.000222833	0.000280152	0.000193663	0.000155461	0.000250021
DTDPRHAMSYN-PWY: dTDP-L-rhamnose biosynthesis I	0.000132217	0.000358211	0.00023744	0.000498217	0.000348523	0.000320723	0.000326915	0.000454118	0.000402519	0.000469869	0.000327525	0.000482766	0.000470904	0.000483048
ECASYN-PWY: enterobacterial common antigen biosynthesis	7.22689E-05	1.05194E-05	4.29822E-05	4.90132E-06	0	1.18822E-05	1.08162E-05	0	0	0	0	0	0	0
ENTBACSYN-PWY: enterobactin biosynthesis	0.000139728	4.77631E-05	0.00010385	2.97521E-05	0	5.42769E-05	4.22672E-05	9.68659E-06	0	0	2.08152E-05	0	0	0
FAO-PWY: fatty acid &beta;-oxidation I	4.46939E-05	5.42776E-05	4.19043E-05	2.23348E-05	2.90909E-05	4.35825E-05	3.31678E-05	9.01272E-06	0	3.34783E-06	1.95448E-05	1.81715E-05	0	3.04828E-05
FASYN-ELONG-PWY: fatty acid elongation -- saturated	0.000126066	4.63191E-05	9.74507E-05	3.07636E-05	6.07229E-05	4.7777E-05	3.46561E-05	1.24572E-05	1.43587E-05	6.1452E-06	2.03915E-06	2.47168E-06	3.61946E-06	9.79885E-06
FASYN-INITIAL-PWY: superpathway of fatty acid biosynthesis initiation (E. coli)	0.000119452	3.19742E-05	7.55471E-05	2.06088E-05	4.19496E-05	3.26281E-05	2.26193E-05	7.85061E-06	9.15234E-06	3.86141E-06	1.27856E-06	1.55312E-06	2.28008E-06	6.57235E-06
FERMENTATION-PWY: mixed acid fermentation	0.000119161	5.39458E-05	0.000143825	5.59444E-05	9.65092E-05	9.61749E-05	4.95078E-05	2.14757E-05	0	0.000122402	3.72177E-05	6.14919E-05	0	0.000222733
FOLSYN-PWY: superpathway of tetrahydrofolate biosynthesis and salvage	9.09932E-05	7.69554E-05	8.24857E-05	8.1899E-05	5.64773E-05	9.34695E-05	5.80021E-05	4.46564E-05	4.26575E-05	6.32554E-05	4.52738E-05	7.64911E-05	2.30523E-05	4.39183E-05
FUC-RHAMCAT-PWY: superpathway of fucose and rhamnose degradation	0.000117091	5.11468E-05	8.50289E-05	3.6174E-05	2.86857E-05	7.56004E-05	4.90385E-05	9.4798E-06	0	2.00834E-06	1.90112E-06	2.34546E-05	0	0
FUCCAT-PWY: fucose degradation	0.000114847	3.47778E-05	6.3826E-05	4.56219E-05	2.18962E-05	6.3892E-05	3.19222E-05	7.21845E-06	0	1.55644E-05	5.17591E-05	4.24556E-05	5.15266E-05	2.50186E-05
GALACT-GLUCUROCAT-PWY: superpathway of hexuronide and hexuronate degradation	0.000134865	0.000122079	0.000116594	0.000106601	7.79293E-05	9.57482E-05	0.000148964	0.000108937	9.23381E-05	0.000138634	7.46433E-05	8.33714E-05	0.000152861	0.000152039
GALACTARDEG-PWY: D-galactarate degradation I	6.46163E-05	1.42267E-05	3.49109E-05	2.41591E-06	4.67369E-07	6.77214E-06	1.08993E-05	2.46637E-07	0	0	0	0	0	0
GALACTUROCAT-PWY: D-galacturonate degradation I	0.00012044	0.000131142	0.000107131	0.000114262	7.61159E-05	9.93177E-05	0.000135858	9.32873E-05	8.52135E-05	0.000106736	8.73038E-05	8.34571E-05	0.000161239	0.000187641
GLCMANNANAUT-PWY: superpathway of N-acetylglucosamine, N-acetylmannosamine and N-acetylneuraminate degradation	0.000219192	0.000164434	0.000173593	0.000147774	9.73472E-05	0.000125037	0.000200342	0.000121924	0.000210575	0.000137045	0.000124811	0.000111819	0.000118977	0.000158111
GLUCARDEG-PWY: D-glucarate degradation I	8.60441E-05	1.37535E-05	4.32255E-05	2.31166E-06	3.25227E-06	8.4629E-06	1.14499E-05	2.3155E-07	0	0	0	0	0	0
GLUCARGALACTSUPER-PWY: superpathway of D-glucarate and D-galactarate degradation	6.46163E-05	1.42267E-05	3.49109E-05	2.41591E-06	4.67369E-07	6.77214E-06	1.08993E-05	2.46637E-07	0	0	0	0	0	0
GLUCONEO-PWY: gluconeogenesis I	9.83805E-05	0.000150915	0.000114722	9.05226E-05	0.000160024	0.000153849	8.60898E-05	3.56365E-05	6.14948E-05	4.08288E-05	0.000162704	0.000120052	3.39814E-05	4.26898E-05
GLUCOSE1PMETAB-PWY: glucose and glucose-1-phosphate degradation	0.000142193	3.68584E-05	7.15366E-05	2.70403E-05	5.79611E-07	7.79362E-05	4.11253E-05	6.98143E-06	0	0	1.48662E-06	0	0	0
GLUCUROCAT-PWY: superpathway of &beta;-D-glucuronide and D-glucuronate degradation	0.000141268	0.000119941	0.000124968	0.00010412	7.31805E-05	0.000105967	0.00016605	0.000106505	9.24449E-05	0.000178144	9.19191E-05	7.89725E-05	0.000183893	0.000161148
GLUDEG-I-PWY: GABA shunt	2.76956E-05	2.60888E-05	7.20702E-05	4.50912E-05	2.51088E-05	3.45353E-05	1.90906E-05	2.11483E-06	0	0	7.04471E-06	3.2801E-05	0	2.20832E-06
GLUTORN-PWY: L-ornithine biosynthesis	0.00021723	9.70679E-05	0.000180287	9.4422E-05	5.61882E-05	0.000119067	8.90753E-05	9.12283E-05	7.06566E-05	6.62885E-05	4.60845E-05	4.47914E-05	0.00011828	4.61838E-05
GLYCOCAT-PWY: glycogen degradation I (bacterial)	8.55084E-05	3.0352E-05	7.76177E-05	2.43912E-05	5.45261E-06	5.26465E-05	4.14167E-05	1.48972E-05	9.39693E-05	1.78285E-05	1.51804E-05	2.82048E-05	3.73909E-06	3.30655E-06
GLYCOGENSYNTH-PWY: glycogen biosynthesis I (from ADP-D-Glucose)	0.000161045	0.00031286	0.000168023	0.000387477	0.000304311	0.000238483	0.000257986	0.000292575	0.000367927	0.000418225	0.000198414	0.000354074	0.000331419	0.000399315
GLYCOL-GLYOXDEG-PWY: superpathway of glycol metabolism and degradation	7.08409E-05	8.65448E-06	3.32386E-05	8.12375E-06	0	3.37252E-05	9.56804E-06	1.22314E-06	0	0	4.09724E-07	0	0	0
GLYCOLYSIS-E-D: superpathway of glycolysis and Entner-Doudoroff	0.000132314	4.26136E-05	0.000108476	2.61926E-05	5.89112E-05	5.07186E-05	4.80048E-05	2.65721E-05	9.21664E-05	2.04995E-05	3.92219E-05	5.21596E-05	1.50754E-05	2.91048E-05
GLYCOLYSIS-TCA-GLYOX-BYPASS: superpathway of glycolysis, pyruvate dehydrogenase, TCA, and glyoxylate bypass	0.000149459	5.16263E-05	0.000122967	2.74235E-05	1.06938E-05	6.12029E-05	4.61827E-05	7.92707E-06	0	0	4.76185E-06	0	0	1.94283E-06
GLYCOLYSIS: glycolysis I (from glucose 6-phosphate)	0.000270103	0.000128614	0.000278603	9.76192E-05	0.000164884	0.000140737	0.000119568	3.28796E-05	0.000156076	2.85996E-05	0.000213253	0.000117055	3.44173E-05	7.70519E-05
GLYOXYLATE-BYPASS: glyoxylate cycle	9.17801E-05	3.08485E-05	7.93868E-05	2.38714E-05	3.69997E-06	4.90417E-05	4.20863E-05	4.62736E-06	0	0	3.97535E-06	0	0	1.00566E-06
GOLPDLCAT-PWY: superpathway of glycerol degradation to 1,3-propanediol	2.33679E-05	4.38687E-05	3.07827E-05	1.75326E-05	2.24859E-05	4.09231E-05	3.49276E-05	1.23617E-05	4.56192E-05	1.75777E-05	8.26346E-06	2.38832E-05	1.68893E-05	2.32303E-05
HCAMHPDEG-PWY: 3-phenylpropanoate and 3-(3-hydroxyphenyl)propanoate degradation to 2-oxopent-4-enoate	4.35651E-05	8.20474E-06	2.83736E-05	5.29402E-07	2.36422E-07	2.38928E-06	7.91743E-06	0	0	0	0	0	0	0
HEME-BIOSYNTHESIS-II: heme biosynthesis I (aerobic)	2.13641E-05	1.71566E-05	2.3967E-05	5.4362E-06	0.001952	3.82268E-06	6.81532E-06	1.17574E-05	3.69298E-05	5.78474E-06	9.79329E-06	9.40591E-06	3.50806E-06	9.9812E-07
HEMESYN2-PWY: heme biosynthesis II (anaerobic)	9.67781E-05	3.96431E-05	7.41736E-05	1.2418E-05	8.32289E-06	3.71218E-05	2.53214E-05	1.48771E-05	4.03783E-05	6.56755E-06	1.12772E-05	1.11256E-05	1.01196E-05	3.5563E-06
HEXITOLDEGSUPER-PWY: superpathway of hexitol degradation (bacteria)	0.00015548	7.00716E-05	0.000155484	7.4121E-05	5.42694E-05	8.6496E-05	7.36401E-05	2.82867E-05	0.00014917	3.0445E-05	7.02865E-05	7.0819E-05	3.97926E-05	3.76665E-05
HISDEG-PWY: L-histidine degradation I	8.26487E-05	0.000145756	2.90853E-05	3.21481E-05	0.000130898	0.00013702	2.22627E-05	1.59441E-05	9.58698E-06	3.55933E-05	5.77077E-05	4.10606E-05	8.01872E-06	4.44875E-05
HISTSYN-PWY: L-histidine biosynthesis	0.000152662	0.00018687	0.000172658	0.000176247	0.000192844	0.000176216	0.000204679	0.000205923	0.000260857	0.000217139	0.000189895	0.000207135	0.000248081	0.000298927
HOMOSER-METSYN-PWY: L-methionine biosynthesis I	7.92258E-05	9.8526E-05	0.000114661	7.89154E-05	0.00012633	8.03609E-05	0.000110735	7.10864E-05	0.000132917	0.000135887	0.000107672	0.00010087	0.000127496	0.000116562
HSERMETANA-PWY: L-methionine biosynthesis III	4.13249E-05	9.76336E-05	6.84368E-05	7.68694E-05	0.000124122	8.02756E-05	8.39818E-05	6.86784E-05	0.06777	0.000102996	0.000131828	9.9389E-05	0.00011049	0.000116103
ILEUSYN-PWY: L-isoleucine biosynthesis I (from threonine)	0.000256534	0.000623411	0.000379993	0.000652221	0.000561497	0.000552141	0.000578817	0.000646276	0.000589703	0.000617384	0.000504355	0.000558059	0.000669527	0.000626257
KDO-NAGLIPASYN-PWY: superpathway of (Kdo)2-lipid A biosynthesis	4.92204E-05	1.10311E-05	4.06109E-05	5.76398E-06	2.59174E-07	1.50279E-05	8.99566E-06	8.57777E-07	0	0	0	0	0	0
KETOGLUCONMET-PWY: ketogluconate metabolism	1.47161E-05	2.06654E-05	4.34506E-05	1.51484E-05	1.49923E-06	4.05849E-05	1.98255E-05	8.80761E-06	0	0	1.39527E-06	1.34318E-06	0	1.93372E-06
LACTOSECAT-PWY: lactose and galactose degradation I	2.27118E-05	2.3715E-05	2.87202E-05	4.25218E-05	7.28859E-06	2.06377E-05	2.48702E-05	3.59906E-05	2.17632E-05	5.79006E-05	5.05922E-05	1.17108E-05	5.80288E-06	0.000105435
LPSSYN-PWY: superpathway of lipopolysaccharide biosynthesis	7.2066E-05	0	0	0	0	7.97723E-06	2.6592E-06	0	0	0	0	0	0	0
MET-SAM-PWY: superpathway of S-adenosyl-L-methionine biosynthesis	0.000132963	0.000166252	0.000191863	0.000147198	0.000215575	0.00013904	0.0001858	0.000133631	0.000218789	0.000234033	0.000168945	0.000181203	0.000227663	0.000203568
METHANOGENESIS-PWY: methanogenesis from H2 and CO2	2.57454E-06	0	0	0	1.92991E-05	4.4368E-07	0	0	0	0	1.19728E-05	0	0	3.06863E-05
METHGLYUT-PWY: superpathway of methylglyoxal degradation	6.81636E-05	8.27212E-06	3.27893E-05	6.34357E-06	0	1.63742E-05	8.43136E-06	6.09587E-07	0	0	3.95086E-07	0	0	0
METSYN-PWY: L-homoserine and L-methionine biosynthesis	0.000119798	0.000166614	0.000173915	0.000137833	0.00020475	0.00013652	0.000184919	0.000125306	0.000211838	0.000225843	0.000182256	0.000168369	0.000206117	0.000193375
NAD-BIOSYNTHESIS-II: NAD salvage pathway II	0.00010977	4.34361E-05	7.35356E-05	2.63685E-05	2.13906E-05	4.32561E-05	2.50771E-05	5.2326E-06	6.7408E-06	1.23328E-06	2.34425E-05	2.53769E-07	2.16443E-06	3.18182E-05
NAGLIPASYN-PWY: lipid IVA biosynthesis	9.3729E-05	3.06463E-05	7.11668E-05	1.29541E-05	5.00606E-06	3.44151E-05	2.49933E-05	1.28655E-05	1.24688E-05	4.03743E-06	4.10441E-06	8.67967E-06	2.66504E-06	7.5654E-07
NONMEVIPP-PWY: methylerythritol phosphate pathway I	0.000258848	0.000569668	0.000314569	0.0005895	0.000584658	0.000475409	0.000619972	0.000665326	0.00054589	0.000745589	0.000528167	0.00054381	0.000561515	0.000626944
NONOXIPENT-PWY: pentose phosphate pathway (non-oxidative branch)	0.000206274	0.00043361	0.000227476	0.000439182	0.000370083	0.000352887	0.000329349	0.000286304	0.000412771	0.00045395	0.000353875	0.000456323	0.000462799	0.000480338
OANTIGEN-PWY: O-antigen building blocks biosynthesis (E. coli)	0.000130731	0.000117973	0.000157378	0.000155919	8.46911E-05	0.00016432	9.7429E-05	0.000115639	0.000145408	0.000266178	6.54149E-05	4.31947E-05	6.84722E-05	0.000102297
ORNARGDEG-PWY: superpathway of L-arginine and L-ornithine degradation	7.46287E-05	1.14343E-05	3.29735E-05	1.23009E-06	0	3.82092E-06	1.09871E-05	0	0	0	0	0	0	0
ORNDEG-PWY: superpathway of ornithine degradation	5.91493E-05	1.06617E-05	2.42686E-05	3.04934E-06	0	6.74465E-06	7.9697E-06	1.36135E-06	0	0	0	0	0	0
P105-PWY: TCA cycle IV (2-oxoglutarate decarboxylase)	0.000125453	4.92009E-05	0.00010197	3.77206E-05	4.77268E-06	6.10716E-05	4.62707E-05	7.44169E-06	0	0	3.76374E-06	0	0	1.68587E-06
P108-PWY: pyruvate fermentation to propanoate I	1.57235E-05	3.28665E-05	7.50106E-06	6.33705E-06	9.11594E-06	4.12038E-05	1.82258E-05	3.56773E-06	0	1.92867E-06	7.89497E-05	4.67042E-06	0	2.42498E-06
P122-PWY: heterolactic fermentation	2.44122E-05	4.44556E-05	1.95878E-05	2.36295E-06	1.30818E-05	3.4213E-06	1.18113E-05	0	0	5.47722E-06	0	0	0	0
P124-PWY: Bifidobacterium shunt	2.86018E-05	7.88934E-05	4.04027E-05	3.29243E-05	5.3975E-05	7.21525E-05	9.43709E-05	0	3.70788E-05	6.73737E-06	4.5987E-05	3.74273E-05	6.34477E-05	5.8649E-05
P125-PWY: superpathway of (R,R)-butanediol biosynthesis	0	0	0	0	0	0	0	0	0	0	0	0	0	0
P161-PWY: acetylene degradation	0.000103183	5.65453E-05	7.87326E-05	1.30085E-05	3.54603E-05	2.30651E-05	3.8436E-05	1.01157E-05	2.45843E-05	1.61521E-05	1.23181E-05	2.01629E-05	1.69149E-05	1.25331E-05
P162-PWY: L-glutamate degradation V (via hydroxyglutarate)	3.12368E-05	4.84999E-05	1.85605E-05	2.6644E-05	3.5276E-05	4.33258E-05	4.10951E-05	2.57474E-05	4.17632E-05	8.65481E-06	4.31636E-05	3.14664E-05	2.83513E-05	1.7265E-05
P163-PWY: L-lysine fermentation to acetate and butanoate	3.77867E-06	0	0	0	1.67683E-05	0	0	0	0	0	0	0	0	0
P164-PWY: purine nucleobases degradation I (anaerobic)	4.42124E-05	4.6477E-05	1.33023E-05	4.00033E-05	2.30287E-05	5.2764E-05	4.18899E-05	2.25822E-05	3.98853E-05	2.14221E-05	4.03736E-05	3.53086E-05	0	4.00153E-05
P185-PWY: formaldehyde assimilation III (dihydroxyacetone cycle)	2.83021E-05	6.35528E-05	4.51824E-05	3.99961E-05	7.45316E-05	6.97954E-05	6.17827E-05	1.82883E-05	9.47524E-05	2.11689E-05	5.40787E-05	7.23701E-05	2.56175E-05	2.32119E-05
P221-PWY: octane oxidation	1.30128E-07	0	0	0	0	0	0	0	0	0	0	0	0	0
P23-PWY: reductive TCA cycle I	4.99754E-05	1.88562E-05	2.02957E-05	2.00016E-05	1.12166E-05	2.01981E-05	3.27589E-05	4.35116E-06	0	2.4899E-06	5.93945E-07	0	0	6.16926E-07
P261-PWY: coenzyme M biosynthesis I	0	0	0	0	0	0	0	0	0	0	0	0	0	2.93569E-06
P4-PWY: superpathway of L-lysine, L-threonine and L-methionine biosynthesis I	0.000114133	9.42816E-05	0.000134597	7.39782E-05	4.15453E-05	0.000102861	9.25169E-05	7.54403E-05	5.12727E-05	2.59914E-05	6.72027E-05	6.43631E-05	5.17792E-05	5.60134E-05
P42-PWY: incomplete reductive TCA cycle	7.41235E-05	6.82096E-05	8.18667E-05	8.84096E-05	0.000122598	8.36018E-05	6.62465E-05	2.36758E-05	9.60637E-05	2.19021E-05	0.000104841	8.21633E-05	5.14804E-05	8.02299E-05
P441-PWY: superpathway of N-acetylneuraminate degradation	0.000170412	0.000106247	0.000142583	4.80292E-05	7.81401E-05	7.74262E-05	8.64999E-05	2.69039E-05	8.08819E-05	2.98482E-05	8.35329E-05	7.80543E-05	3.36533E-05	3.48822E-05
P461-PWY: hexitol fermentation to lactate, formate, ethanol and acetate	0.000127224	4.14093E-05	0.000103135	4.98532E-05	2.37172E-05	5.51369E-05	4.51553E-05	1.56117E-05	0.000170736	3.72772E-05	2.80424E-05	4.06606E-05	7.0922E-05	2.01961E-05
P562-PWY: myo-inositol degradation I	0	9.51559E-07	0	0	0	0	0	0	0	0	0	0	0	0
PANTO-PWY: phosphopantothenate biosynthesis I	0.000235853	0.000419514	0.000303755	0.000436426	0.000390418	0.000402981	0.000433206	0.000512204	0.000456997	0.000547572	0.000421551	0.000367252	0.000468373	0.000376355
PANTOSYN-PWY: pantothenate and coenzyme A biosynthesis I	0.000166487	0.000258852	0.00017922	0.000198859	0.000187138	0.000225622	0.000227116	0.000210105	0.000351342	0.00027851	0.000268659	0.00024087	0.00032121	0.000258955
PENTOSE-P-PWY: pentose phosphate pathway	0.000129383	8.0264E-05	0.000125357	6.11523E-05	8.61034E-05	8.20316E-05	6.31169E-05	5.88344E-05	0.000104593	5.5011E-05	3.25187E-05	0.05842	3.06521E-05	5.29713E-05
PEPTIDOGLYCANSYN-PWY: peptidoglycan biosynthesis I (meso-diaminopimelate containing)	0.000294505	0.000587481	0.000375836	0.000612845	0.000601081	0.00050951	0.000618618	0.000647757	0.000601078	0.000749594	0.000660393	0.000556222	0.000590606	0.000643458
PHOSLIPSYN-PWY: superpathway of phospholipid biosynthesis I (bacteria)	0.000202961	0.000169234	0.000166137	0.000126839	9.34505E-05	0.000175017	0.00012804	0.000125776	0.000158821	2.66491E-05	0.000113257	8.40974E-05	2.48951E-05	1.60652E-05
POLYAMINSYN3-PWY: superpathway of polyamine biosynthesis II	3.73665E-05	2.22052E-05	3.35548E-05	4.96304E-05	1.5712E-05	2.40922E-05	1.55666E-05	4.11121E-05	0	2.21853E-06	1.97437E-05	0	1.94695E-05	0
POLYAMSYN-PWY: superpathway of polyamine biosynthesis I	4.75872E-05	7.08799E-05	3.62015E-05	7.0307E-05	4.78305E-05	5.74622E-05	6.59798E-05	6.63814E-05	3.35066E-05	9.6038E-05	6.86538E-05	7.57346E-05	8.4503E-05	8.9091E-05
POLYISOPRENSYN-PWY: polyisoprenoid biosynthesis (E. coli)	8.04136E-05	1.74568E-05	5.70896E-05	1.14838E-05	9.4258E-06	2.66521E-05	1.88239E-05	2.21962E-06	0	0	5.90963E-07	0	0	1.31347E-06
PPGPPMET-PWY: ppGpp biosynthesis	8.0731E-05	6.88711E-05	6.39019E-05	3.31336E-05	0.01703	4.36094E-05	5.10796E-05	5.82951E-06	9.94925E-05	1.98861E-05	2.91443E-05	3.4711E-05	3.65115E-05	2.71934E-05
PROTOCATECHUATE-ORTHO-CLEAVAGE-PWY: protocatechuate degradation II (ortho-cleavage pathway)	4.67859E-06	2.18386E-06	1.33537E-06	0	0	4.5185E-07	1.36959E-07	0	0	0	0	0	0	0
PRPP-PWY: superpathway of histidine, purine, and pyrimidine biosynthesis	0.000150729	0.00020981	0.000146503	0.000132517	0.000221554	0.000183559	0.000120194	0.000142394	0.000181159	9.83318E-05	0.000195195	0.00012732	0.000105972	0.000148732
PWY-1042: glycolysis IV (plant cytosol)	0.000308465	0.000578531	0.000381764	0.000446498	0.000493729	0.000522922	0.000477461	0.000409387	0.000744779	0.000515833	0.000527837	0.000609026	0.000630525	0.000628006
PWY-1269: CMP-3-deoxy-D-manno-octulosonate biosynthesis I	0.000117317	7.64245E-05	0.000126954	5.42495E-05	3.52436E-05	0.000122876	7.5292E-05	4.54427E-05	8.88436E-05	2.14215E-05	0.000116289	5.43421E-05	4.72119E-05	7.74374E-06
PWY-1861: formaldehyde assimilation II (RuMP Cycle)	2.53186E-07	4.33729E-05	6.2798E-07	1.97999E-06	5.07583E-06	5.91477E-06	1.24795E-06	2.41616E-06	0	0	2.29937E-06	2.30537E-06	8.77729E-06	2.2413E-05
PWY-241: C4 photosynthetic carbon assimilation cycle, NADP-ME type	3.4277E-05	3.96252E-05	4.20626E-05	3.16095E-05	5.95575E-05	7.29038E-05	2.74574E-05	1.2072E-05	0	5.60583E-05	2.33536E-05	3.62806E-05	0	7.13639E-05
PWY-2723: trehalose degradation V	5.98347E-05	1.58179E-05	4.7966E-05	1.26464E-05	0	2.91185E-05	2.22279E-05	1.38558E-06	0	0	0	0	0	0
PWY-2941: L-lysine biosynthesis II	3.55605E-05	6.27062E-05	0.000111698	8.21372E-05	7.24511E-05	8.49883E-05	9.18627E-05	0.000163503	0.000143864	0.000101758	0.000118552	3.11802E-05	8.45524E-05	0.00019871
PWY-2942: L-lysine biosynthesis III	0.000212015	0.000471042	0.000330743	0.000496369	0.000496672	0.000388077	0.000568257	0.000653011	0.000487996	0.000716981	0.000530042	0.000470174	0.000525501	0.000518841
PWY-3001: superpathway of L-isoleucine biosynthesis I	0.000209083	0.000333812	0.000263404	0.00028178	0.000284699	0.000301828	0.000287846	0.000256331	0.000290662	0.000310053	0.000273207	0.000266962	0.00034451	0.000393466
PWY-3781: aerobic respiration I (cytochrome c)	9.15368E-07	0	0	0	1.8031E-06	2.59997E-06	0	7.31952E-06	0	0	0	0	0	0
PWY-3841: folate transformations II	0.000170093	0.000210183	0.000233246	0.000409839	0.000321371	0.000270976	0.000217823	0.000439583	0.00036547	0.00023023	0.000330931	0.000306117	0.000406639	0.000246684
PWY-4041: &gamma;-glutamyl cycle	0.000113309	2.60966E-05	7.44415E-05	1.14248E-05	3.4464E-06	2.88276E-05	2.18782E-05	1.87764E-06	0	3.7859E-07	4.2356E-07	0	0	0
PWY-4242: pantothenate and coenzyme A biosynthesis III	0.000122521	0.000110221	0.000110577	4.43695E-05	9.23384E-05	0.000126855	7.12596E-05	8.63014E-05	8.94049E-05	6.48433E-05	0.00018511	7.32687E-05	6.09752E-05	0.000121368
PWY-4361: S-methyl-5-thio-&alpha;-D-ribose 1-phosphate degradation	0	7.41559E-07	0	0	0	0	0	0	0	0	0	0	0	0
PWY-4702: phytate degradation I	5.13545E-05	7.41711E-06	3.90993E-05	0.004974	0	3.10497E-05	9.80656E-06	3.01502E-07	0	0	4.27723E-05	1.5049E-07	0	1.74794E-07
PWY-4981: L-proline biosynthesis II (from arginine)	6.83349E-05	5.40258E-05	3.07669E-05	6.26859E-05	4.19592E-05	0.00014724	4.94909E-05	2.29335E-05	2.56314E-05	4.05159E-05	0.000103159	4.96932E-05	6.65301E-06	0.00019817
PWY-4984: urea cycle	2.04336E-05	1.70531E-05	6.2489E-06	0.000101086	3.81905E-05	2.43723E-05	1.98072E-05	2.0311E-05	4.35001E-05	7.14486E-06	2.94774E-05	8.69622E-06	2.42351E-05	1.28496E-05
PWY-5004: superpathway of L-citrulline metabolism	9.18944E-07	0	0	1.57006E-06	0	0	0	0	0	0	0	0	0	0
PWY-5005: biotin biosynthesis II	1.15016E-06	0	4.11689E-06	1.51785E-05	9.28274E-07	0	2.08921E-05	0	2.04124E-05	2.69594E-05	2.84998E-05	1.18163E-05	0	2.93492E-05
PWY-5022: 4-aminobutanoate degradation V	5.15436E-05	3.10802E-05	6.41994E-05	4.52097E-05	0.02649	3.93972E-05	2.14428E-05	2.14362E-06	0	0	0.006937	3.38051E-05	0	2.22721E-06
PWY-5030: L-histidine degradation III	2.33789E-05	5.14103E-05	1.08683E-05	3.24249E-05	2.29186E-05	4.07868E-05	2.34243E-05	1.79433E-05	9.76428E-06	2.89741E-05	2.13596E-05	1.18289E-05	9.62553E-06	3.01562E-05
PWY-5083: NAD/NADH phosphorylation and dephosphorylation	0.000130187	4.49523E-05	9.84569E-05	2.27641E-05	6.83058E-06	3.93393E-05	3.34894E-05	2.6161E-06	0	8.93426E-07	5.82798E-07	0	0	3.81007E-07
PWY-5088: L-glutamate degradation VIII (to propanoate)	9.14556E-08	0	0	0	7.67239E-07	2.40033E-05	0	0	0	0	7.49651E-07	0	0	6.93801E-07
PWY-5097: L-lysine biosynthesis VI	0.000217524	0.000538462	0.000340487	0.000580261	0.000517971	0.000447008	0.000602878	0.000681673	0.000537695	0.000755643	0.000547902	0.000500692	0.000625734	0.000578144
PWY-5100: pyruvate fermentation to acetate and lactate II	9.45745E-05	0.000289105	0.000147844	0.000151508	0.000266032	0.000214798	0.000228565	0.00011734	0.000174391	0.000272024	0.000263386	0.000193414	0.000218634	0.000387193
PWY-5101: L-isoleucine biosynthesis II	2.36656E-05	4.89181E-05	7.75346E-05	0.000105351	7.56227E-05	5.56882E-05	2.65314E-05	2.67755E-05	4.58944E-05	3.47289E-05	3.52948E-05	5.50428E-05	0.000124689	4.7527E-05
PWY-5103: L-isoleucine biosynthesis III	0.000209222	0.000396442	0.00028088	0.000350189	0.000352549	0.00037436	0.000349754	0.000256433	0.00027814	0.000377871	0.000401123	0.000329037	0.000348674	0.000496864
PWY-5104: L-isoleucine biosynthesis IV	8.36089E-05	0.000134397	5.32032E-05	0.000165037	0.00026225	0.00018737	0.000172881	2.51405E-05	0.000105529	0.000270815	0.000275916	0.000108622	0.000123616	0.00039568
PWY-5121: superpathway of geranylgeranyl diphosphate biosynthesis II (via MEP)	0.000128069	7.90491E-05	0.000100566	6.83118E-05	3.65942E-05	5.91389E-05	7.45902E-05	6.9667E-05	9.17073E-06	5.62374E-06	6.30542E-05	2.16163E-05	2.71724E-05	6.6883E-05
PWY-5136: fatty acid &beta;-oxidation II (peroxisome)	2.83206E-05	4.99022E-05	2.6147E-05	1.75612E-05	2.45924E-05	3.62466E-05	2.61063E-05	7.70973E-06	0	2.81002E-06	1.70648E-05	1.56769E-05	0	2.61453E-05
PWY-5138: unsaturated, even numbered fatty acid &beta;-oxidation	7.87233E-06	2.15988E-06	5.30792E-06	9.84808E-07	3.69158E-07	3.97718E-06	3.35582E-06	0	0	0	0	0	0	0
PWY-5154: L-arginine biosynthesis III (via N-acetyl-L-citrulline)	0.000130099	0.000112519	0.000181681	0.000111618	7.71418E-05	0.000131759	5.2771E-05	7.94188E-05	9.92411E-05	3.66475E-05	5.72514E-05	5.92562E-05	0.000143806	3.16074E-05
PWY-5173: superpathway of acetyl-CoA biosynthesis	2.98352E-05	1.3062E-05	1.92412E-05	2.27238E-06	8.7428E-06	1.32987E-05	6.58739E-06	1.43462E-06	0	3.39062E-07	4.81398E-06	0	0	0
PWY-5177: glutaryl-CoA degradation	6.66207E-05	0.000120957	7.08834E-05	9.28131E-05	0.000101467	8.57512E-05	0.000107836	8.4678E-05	2.20015E-05	0.000103054	8.95621E-05	0.000111719	0.000134907	0.000187701
PWY-5188: tetrapyrrole biosynthesis I (from glutamate)	0.000118712	0.000198739	0.00014168	0.000168091	0.000134198	0.000154129	0.000171949	0.000102662	0.000210596	0.000247692	0.000185787	0.000113235	0.000183689	0.000219493
PWY-5189: tetrapyrrole biosynthesis II (from glycine)	0.000103972	5.58189E-05	8.50589E-05	3.54751E-05	2.08479E-05	6.41262E-05	4.28052E-05	1.67245E-05	3.89923E-05	2.51136E-05	2.75513E-05	1.9587E-05	1.01608E-05	3.72938E-05
PWY-5198: factor 420 biosynthesis	2.64239E-06	0	0	0	1.24493E-05	5.29416E-07	0	0	0	0	8.61719E-06	0	0	2.0927E-05
PWY-5265: peptidoglycan biosynthesis II (staphylococci)	0	0	0	0	0	0	0	0	0	0	5.70874E-06	0	0	0
PWY-5304: superpathway of sulfur oxidation (Acidianus ambivalens)	9.06363E-06	4.09282E-05	1.75216E-05	2.25589E-05	4.17314E-05	3.88582E-05	2.7352E-05	2.4685E-05	5.36796E-05	9.76478E-05	2.52894E-05	4.08985E-05	3.17019E-05	5.02782E-05
PWY-5345: superpathway of L-methionine biosynthesis (by sulfhydrylation)	8.07185E-05	9.66322E-05	9.88417E-05	3.35084E-05	3.69718E-05	9.9086E-05	6.0361E-05	7.98281E-06	1.45396E-05	1.79532E-05	0.000139761	3.67965E-05	0	6.06818E-05
PWY-5347: superpathway of L-methionine biosynthesis (transsulfuration)	0.000127718	0.00016917	0.000177831	0.000136627	0.000187899	0.000140154	0.000176917	0.000129255	0.000219001	0.000210098	0.000162508	0.000160165	0.000210668	0.000196741
PWY-5367: petroselinate biosynthesis	3.94283E-06	0.01389	3.47696E-05	0.000246178	7.42801E-06	2.39481E-05	2.3512E-05	0.00016042	9.35892E-05	0.000110252	2.69427E-05	0.000146112	0.000260019	0.000159426
PWY-5384: sucrose degradation IV (sucrose phosphorylase)	5.68346E-05	1.58067E-05	5.87737E-05	1.71981E-05	3.93142E-06	2.88194E-05	2.2032E-05	1.08886E-05	0	4.02518E-05	2.61781E-06	0	3.88407E-07	9.78895E-06
PWY-5415: catechol degradation I (meta-cleavage pathway)	1.23616E-05	6.09947E-06	1.97911E-06	0	0	5.88271E-07	0	0	0	0	0	0	0	0
PWY-5417: catechol degradation III (ortho-cleavage pathway)	1.47861E-07	3.00139E-06	0	0	0	0	0	0	0	0	0	0	0	0
PWY-5431: aromatic compounds degradation via &beta;-ketoadipate	1.47861E-07	3.00139E-06	0	0	0	0	0	0	0	0	0	0	0	0
PWY-5464: superpathway of cytosolic glycolysis (plants), pyruvate dehydrogenase and TCA cycle	5.75117E-05	2.23877E-05	1.63528E-05	9.62191E-06	2.07681E-05	4.29488E-05	2.1333E-05	5.57791E-06	0	1.0051E-06	1.66426E-05	0	0	0
PWY-5484: glycolysis II (from fructose 6-phosphate)	0.00023703	0.000117529	0.000266554	9.54417E-05	0.000152639	0.000130172	0.00011278	3.2395E-05	0.000151866	2.80845E-05	0.000202239	0.000113601	3.41555E-05	7.34861E-05
PWY-5505: L-glutamate and L-glutamine biosynthesis	3.64574E-05	5.49503E-05	6.83915E-05	4.68175E-05	5.43492E-05	4.88805E-05	3.83084E-05	3.42076E-05	2.6629E-05	8.5437E-06	4.94976E-05	2.43307E-05	2.7953E-05	1.24745E-05
PWY-5509: adenosylcobalamin biosynthesis from cobyrinate a,c-diamide I	0	0	0	0	0	6.76148E-06	0	0	0	0	0	0	0	0
PWY-561: superpathway of glyoxylate cycle and fatty acid degradation	5.14712E-05	4.25364E-05	4.65392E-05	2.41132E-05	3.25905E-06	4.6151E-05	3.15866E-05	5.1479E-06	0	0	2.48005E-06	0	0	1.30907E-06
PWY-5656: mannosylglycerate biosynthesis I	1.13552E-05	5.48403E-06	2.34254E-05	1.1106E-06	0	1.01113E-06	7.41108E-06	0	0	0	0	0	0	0
PWY-5659: GDP-mannose biosynthesis	0.00011586	0.000128621	0.000198405	0.000216773	0.000125309	0.000188629	0.000141695	0.000120079	0.0002063	0.000184785	0.000197227	0.000131084	9.51419E-05	0.000184888
PWY-5667: CDP-diacylglycerol biosynthesis I	0.000297714	0.00049506	0.00038594	0.000593317	0.000507505	0.000407175	0.000568066	0.000580267	0.000612283	0.000682826	0.000500396	0.00057406	0.000622585	0.000575136
PWY-5675: nitrate reduction V (assimilatory)	1.72757E-07	0	0	0	2.58571E-06	0	0	0	0	0	0	0	0	0
PWY-5676: acetyl-CoA fermentation to butanoate II	9.68462E-05	0.000126722	6.47541E-05	6.67347E-05	8.87927E-05	0.000101323	7.14795E-05	5.55897E-05	0.000133994	8.15476E-05	6.53926E-05	9.97634E-05	0.000137941	7.93099E-05
PWY-5686: UMP biosynthesis	0.00029866	0.000639079	0.000416514	0.0007123	0.000625561	0.000508829	0.000704019	0.00072567	0.000651083	0.00082311	0.000607347	0.0006197	0.000666024	0.000747572
PWY-5690: TCA cycle II (plants and fungi)	0.000127798	5.59898E-05	9.96605E-05	5.69559E-05	8.19545E-05	7.03159E-05	7.05465E-05	3.25095E-05	3.13426E-05	3.03812E-05	6.06878E-05	2.21327E-05	0.01979	1.09208E-05
PWY-5692: allantoin degradation to glyoxylate II	2.72394E-06	8.88845E-06	1.6781E-05	8.69862E-06	0	1.64111E-05	9.58057E-06	3.41366E-07	0	0	0	0	0	0
PWY-5695: urate biosynthesis/inosine 5'-phosphate degradation	0.000314046	0.000399813	0.000383707	0.000336896	0.000395655	0.00036626	0.00027901	0.000363378	0.00031358	0.000242492	0.000262481	0.000252247	0.000338224	0.000293841
PWY-5705: allantoin degradation to glyoxylate III	2.08721E-05	1.20263E-05	4.04043E-05	8.69862E-06	6.16087E-07	1.64111E-05	1.12739E-05	3.72997E-07	0	0	0	0	0	0
PWY-5723: Rubisco shunt	0.000156026	6.10867E-05	0.00012786	2.13255E-05	4.52834E-06	8.93658E-05	4.64186E-05	1.65719E-06	0	0	2.6365E-06	0	0	0
PWY-5747: 2-methylcitrate cycle II	1.0425E-05	4.8846E-06	3.00914E-06	5.48554E-07	1.54571E-06	7.45855E-07	2.26156E-06	0	0	0	0	0	0	0
PWY-5791: 1,4-dihydroxy-2-naphthoate biosynthesis II (plants)	8.02442E-05	3.31874E-05	4.72829E-05	1.74195E-05	5.65295E-06	3.37503E-05	3.82212E-05	5.9577E-06	4.3327E-06	1.69973E-06	0	0	0	0
PWY-5837: 1,4-dihydroxy-2-naphthoate biosynthesis I	8.02442E-05	3.31874E-05	4.72829E-05	1.74195E-05	5.65295E-06	3.37503E-05	3.82212E-05	5.9577E-06	4.3327E-06	1.69973E-06	0	0	0	0
PWY-5838: superpathway of menaquinol-8 biosynthesis I	0.000111174	6.57201E-05	8.19898E-05	3.32262E-05	0	6.17866E-05	6.71079E-05	9.52755E-06	0	0	0	0	0	0
PWY-5840: superpathway of menaquinol-7 biosynthesis	0.00010835	5.85645E-05	7.54081E-05	4.53664E-05	1.74201E-05	7.15437E-05	4.29921E-05	1.44603E-05	0	5.71983E-06	0	0	0	0
PWY-5845: superpathway of menaquinol-9 biosynthesis	0.00010835	5.85645E-05	7.54081E-05	3.32262E-05	0	5.53996E-05	4.29921E-05	0	0	0	0	0	0	0
PWY-5850: superpathway of menaquinol-6 biosynthesis I	0.00010835	5.85645E-05	7.54081E-05	3.32262E-05	0	5.53996E-05	4.29921E-05	0	0	0	0	0	0	0
PWY-5855: ubiquinol-7 biosynthesis (prokaryotic)	3.51379E-05	2.33021E-05	4.75909E-05	6.71553E-06	4.29192E-06	2.31173E-05	1.56214E-05	8.71923E-07	0	0	9.49889E-07	0	0	0
PWY-5856: ubiquinol-9 biosynthesis (prokaryotic)	3.51379E-05	2.33021E-05	4.75909E-05	6.71553E-06	4.29192E-06	2.31173E-05	1.56214E-05	8.71923E-07	0	0	9.49889E-07	0	0	0
PWY-5857: ubiquinol-10 biosynthesis (prokaryotic)	3.51379E-05	2.33021E-05	4.75909E-05	6.71553E-06	4.29192E-06	2.31173E-05	1.56214E-05	8.71923E-07	0	0	9.49889E-07	0	0	0
PWY-5860: superpathway of demethylmenaquinol-6 biosynthesis I	9.81238E-05	4.34033E-05	6.11719E-05	2.38893E-05	0	4.13585E-05	2.99E-05	0	0	0	0	0	0	0
PWY-5861: superpathway of demethylmenaquinol-8 biosynthesis	0.000101631	4.93802E-05	6.77939E-05	2.38893E-05	0	4.67728E-05	4.78313E-05	6.40545E-06	0	0	0	0	0	0
PWY-5862: superpathway of demethylmenaquinol-9 biosynthesis	9.81238E-05	4.34033E-05	6.11719E-05	2.38893E-05	0	4.13585E-05	2.99E-05	0	0	0	0	0	0	0
PWY-5863: superpathway of phylloquinol biosynthesis	7.40824E-05	3.33305E-05	4.04117E-05	1.85319E-05	5.68638E-06	2.33977E-05	3.64442E-05	6.55759E-06	3.66622E-06	1.91515E-06	0	0	0	0
PWY-5896: superpathway of menaquinol-10 biosynthesis	0.00010835	5.85645E-05	7.54081E-05	3.32262E-05	0	5.53996E-05	4.29921E-05	0	0	0	0	0	0	0
PWY-5897: superpathway of menaquinol-11 biosynthesis	0.000112564	7.36503E-05	8.29015E-05	4.2875E-05	1.57916E-05	7.39126E-05	9.22135E-05	1.73223E-05	1.23214E-05	5.04633E-06	0	0	0	0
PWY-5898: superpathway of menaquinol-12 biosynthesis	0.000112564	7.36503E-05	8.29015E-05	4.2875E-05	1.57916E-05	7.39126E-05	9.22135E-05	1.73223E-05	1.23214E-05	5.04633E-06	0	0	0	0
PWY-5899: superpathway of menaquinol-13 biosynthesis	0.000112564	7.36503E-05	8.29015E-05	4.2875E-05	1.57916E-05	7.39126E-05	9.22135E-05	1.73223E-05	1.23214E-05	5.04633E-06	0	0	0	0
PWY-5910: superpathway of geranylgeranyldiphosphate biosynthesis I (via mevalonate)	0	2.68589E-06	4.55772E-06	5.45459E-06	9.43172E-07	1.95799E-06	1.20838E-06	6.8431E-07	0	0	9.42818E-06	0	0	0
PWY-5913: TCA cycle VI (obligate autotrophs)	8.60108E-05	3.54001E-05	0.000136805	3.27071E-05	5.6047E-05	7.95408E-05	2.90377E-05	1.19148E-05	0	7.45759E-05	1.9745E-05	3.4029E-05	0	0.000299922
PWY-5918: superpathay of heme biosynthesis from glutamate	4.18486E-05	3.48521E-05	4.61465E-05	1.22845E-05	4.60756E-06	9.08223E-06	1.52924E-05	2.00962E-05	5.21236E-05	1.2731E-05	1.99974E-05	1.78889E-05	7.36844E-06	2.45251E-06
PWY-5920: superpathway of heme biosynthesis from glycine	8.72913E-07	0	4.93793E-06	0	1.03301E-06	3.89118E-06	5.55811E-06	0	0	0	8.62038E-06	0	0	0
PWY-5941: glycogen degradation II (eukaryotic)	2.66344E-05	7.86124E-05	3.1489E-05	3.61041E-05	2.64717E-05	1.98455E-05	4.18434E-05	2.44469E-05	0	5.96185E-05	5.31495E-05	0.000127095	5.2866E-05	3.04664E-05
PWY-5971: palmitate biosynthesis II (bacteria and plants)	9.95074E-05	5.14098E-05	0.000104514	3.57309E-05	6.35001E-05	5.37769E-05	3.98353E-05	1.47408E-05	1.69344E-05	7.29092E-06	2.42187E-06	2.9363E-06	4.29714E-06	1.14455E-05
PWY-5973: cis-vaccenate biosynthesis	0.000163304	0.000251912	0.000215304	0.000279519	0.000294803	0.000270278	0.000382185	0.000546952	0.000334556	0.000526999	0.000296701	0.000225398	0.000294195	0.000185358
PWY-5989: stearate biosynthesis II (bacteria and plants)	0.000106925	3.52543E-05	7.36191E-05	0.000139012	4.4183E-05	3.50958E-05	3.2602E-05	0.000123925	0.000103763	0.000104575	3.5147E-05	0.000121655	0.000176925	7.65598E-05
PWY-6113: superpathway of mycolate biosynthesis	4.5079E-05	4.52766E-05	9.42842E-05	3.72347E-05	4.5618E-05	5.01053E-05	3.81309E-05	1.5312E-05	1.75732E-05	7.60675E-06	2.52903E-06	3.07962E-06	4.51006E-06	1.21092E-05
PWY-6121: 5-aminoimidazole ribonucleotide biosynthesis I	0.000239413	0.000547212	0.000362412	0.000565964	0.000604213	0.000465126	0.000477296	0.000477752	0.000512234	0.00060436	0.000516261	0.0005025	0.000492389	0.000635891
PWY-6122: 5-aminoimidazole ribonucleotide biosynthesis II	0.000237286	0.000542539	0.000352741	0.000546215	0.00061143	0.000469607	0.000490285	0.000473342	0.000488621	0.000627393	0.000508563	0.000490169	0.000471995	0.000642365
PWY-6123: inosine-5'-phosphate biosynthesis I	0.000175742	0.000321118	0.000209755	0.000266323	0.000296482	0.000269141	0.000221577	0.000212709	0.000300509	0.00025973	0.000205489	0.000237435	0.000242613	0.000313606
PWY-6124: inosine-5'-phosphate biosynthesis II	0.000161131	0.000294277	0.000190428	0.000237106	0.000269985	0.000244825	0.000195937	0.000185985	0.000273797	0.00022857	0.000182315	0.000213247	0.000216515	0.000284193
PWY-6125: superpathway of guanosine nucleotides de novo biosynthesis II	0.00014806	0.000266465	0.000141921	0.000167699	0.000256074	0.000280199	0.000225953	0.000202562	0.000248787	0.000186586	0.000281831	0.000165972	0.000126638	0.000200994
PWY-6126: superpathway of adenosine nucleotides de novo biosynthesis II	0.000243975	0.000349777	0.000236935	0.000297737	0.000384964	0.00038398	0.000350187	0.000271932	0.000355596	0.000260466	0.000356846	0.000288222	0.000221715	0.000361768
PWY-6138: CMP-N-acetylneuraminate biosynthesis I (eukaryotes)	0	0	0	0	0	0	0	0	0	0	0	0	0	0
PWY-6147: 6-hydroxymethyl-dihydropterin diphosphate biosynthesis I	4.25675E-05	4.88681E-05	7.28594E-05	5.26988E-05	3.43659E-05	4.64248E-05	4.19921E-05	5.30137E-05	7.99882E-06	0.03095	5.94437E-05	4.89395E-05	2.08687E-05	0.000104603
PWY-6151: S-adenosyl-L-methionine cycle I	0.000304291	0.000628879	0.00035658	0.000625647	0.000552704	0.000516312	0.000685052	0.000715769	0.000598284	0.000836914	0.000520806	0.000602556	0.000669612	0.000676144
PWY-6163: chorismate biosynthesis from 3-dehydroquinate	0.000272012	0.000613446	0.000382677	0.000650223	0.000525422	0.000481378	0.000605351	0.000708331	0.000600416	0.000779746	0.000510869	0.00056579	0.000638488	0.000591899
PWY-6165: chorismate biosynthesis II (archaea)	3.33326E-06	0	0	0	0	9.86025E-07	0	0	0	0	0	0	0	1.25357E-06
PWY-6167: flavin biosynthesis II (archaea)	5.89378E-06	0	0	0	2.37662E-05	1.78721E-06	0	0	0	0	2.78335E-05	0	0	5.64014E-05
PWY-6168: flavin biosynthesis III (fungi)	0.000194634	0.000244089	0.000218126	0.000217563	0.000224658	0.000248399	0.000225251	0.000217044	0.000317525	0.00017701	0.000172501	0.000204757	0.000233908	0.000163706
PWY-6174: mevalonate pathway II (archaea)	0	0	0	0	1.51752E-06	5.52002E-07	0	0	0	0	9.22654E-06	0	0	0
PWY-6185: 4-methylcatechol degradation (ortho cleavage)	1.23394E-07	2.54579E-06	0	0	0	0	0	0	0	0	0	0	0	0
PWY-621: sucrose degradation III (sucrose invertase)	0.000152306	0.000222413	0.000162996	0.000226942	0.000132947	0.000187842	0.00017864	0.000224192	0.000298567	0.000324295	0.000148262	0.000247724	0.000389826	0.000289829
PWY-6263: superpathway of menaquinol-8 biosynthesis II	2.81125E-06	0	6.40745E-06	6.24803E-06	0	1.20682E-05	0	2.86167E-06	0	0	8.7907E-07	0	0	0
PWY-6270: isoprene biosynthesis I	0.000207841	0.000146635	0.000244156	0.000120673	0.000108184	0.000185513	0.000151577	0.000180184	0.000148862	8.44404E-06	0.000174235	3.70617E-05	9.55994E-05	0.000117463
PWY-6277: superpathway of 5-aminoimidazole ribonucleotide biosynthesis	0.000237286	0.000542539	0.000352741	0.000546215	0.00061143	0.000469607	0.000490285	0.000473342	0.000488621	0.000627393	0.000508563	0.000490169	0.000471995	0.000642365
PWY-6282: palmitoleate biosynthesis I (from (5Z)-dodec-5-enoate)	0.000114557	3.63207E-05	8.12361E-05	3.37426E-05	4.80142E-05	3.7433E-05	2.87234E-05	1.37809E-05	1.56014E-05	6.8264E-06	2.25316E-06	2.77053E-06	4.0608E-06	1.08755E-05
PWY-6284: superpathway of unsaturated fatty acids biosynthesis (E. coli)	1.75711E-05	2.87892E-05	6.9304E-05	3.72509E-05	1.97474E-05	3.9943E-05	3.37043E-05	1.52775E-05	1.72806E-05	7.57755E-06	2.77472E-06	3.07643E-06	4.50825E-06	1.2059E-05
PWY-6285: superpathway of fatty acids biosynthesis (E. coli)	3.11551E-05	3.86008E-05	8.63992E-05	1.71291E-05	1.51134E-05	4.78653E-05	3.81862E-05	0	0	6.90442E-06	2.71461E-06	0	0	0
PWY-6305: putrescine biosynthesis IV	0.000124163	0.000141269	0.000100407	8.47781E-05	0.000115339	0.000139254	8.37963E-05	6.79888E-05	2.16931E-05	8.77003E-05	9.69677E-05	7.78413E-05	9.98471E-05	0.000112368
PWY-6317: galactose degradation I (Leloir pathway)	0.000154105	0.000350072	0.000263249	0.000379577	0.000328729	0.000238566	0.000324459	0.000347411	0.000389395	0.000495844	0.000275843	0.000373545	0.000426677	0.000417975
PWY-6353: purine nucleotides degradation II (aerobic)	0.000209449	0.000133547	0.000168201	8.90851E-05	6.18566E-05	0.000125605	7.89859E-05	6.73898E-05	0.000127615	5.43133E-05	7.06878E-05	0.000109176	0.000148052	8.19606E-05
PWY-6385: peptidoglycan biosynthesis III (mycobacteria)	0.000223803	0.000287789	0.000200634	0.000288665	0.000303086	0.000273005	0.000354244	0.000335997	0.000267364	0.000290974	0.000398001	0.00025223	0.00031445	0.000344687
PWY-6386: UDP-N-acetylmuramoyl-pentapeptide biosynthesis II (lysine-containing)	0.000291923	0.000616226	0.000379878	0.000648646	0.000606116	0.00053184	0.000615947	0.000638636	0.000611503	0.000751623	0.000670229	0.000571808	0.000610766	0.000662201
PWY-6387: UDP-N-acetylmuramoyl-pentapeptide biosynthesis I (meso-diaminopimelate containing)	0.000290182	0.000602485	0.000376746	0.000637208	0.000598966	0.000515247	0.000602805	0.000632945	0.000601272	0.00074175	0.000654581	0.000558003	0.000601882	0.000647672
PWY-6435: 4-hydroxybenzoate biosynthesis V	0	0	0	1.05308E-05	0	0	0	0	0	2.69779E-06	0	0	0	0
PWY-6467: Kdo transfer to lipid IVA III (Chlamydia)	0	0	0	0	0	0	0	0	0	0	0	0	0	0
PWY-6470: peptidoglycan biosynthesis V (&beta;-lactam resistance)	0	0	0	0	0	0	0	0	0	0	0	0	0	0
PWY-6471: peptidoglycan biosynthesis IV (Enterococcus faecium)	0	1.78149E-05	5.64016E-05	8.8673E-06	0	6.22369E-06	1.05512E-05	6.70926E-05	0.000123542	0	3.11738E-06	0	5.97322E-05	0
PWY-6507: 4-deoxy-L-threo-hex-4-enopyranuronate degradation	0.000120621	0.000121435	0.000105384	0.000114679	6.86407E-05	9.91198E-05	0.000136322	8.32949E-05	7.8391E-05	0.000107887	8.87461E-05	7.75613E-05	0.000156595	0.000187534
PWY-6519: 8-amino-7-oxononanoate biosynthesis I	0.000107415	4.15008E-05	7.73525E-05	2.30208E-05	4.87705E-05	4.34535E-05	2.97315E-05	1.12426E-05	1.27383E-05	5.38817E-06	1.86407E-06	2.24781E-06	3.3098E-06	8.41187E-06
PWY-6527: stachyose degradation	0.000134726	0.000269645	0.000231908	0.00035688	0.000252669	0.000216458	0.000258447	0.000286839	0.000349333	0.000362586	0.000241167	0.000311243	0.00031685	0.00033161
PWY-6531: mannitol cycle	1.29407E-06	1.72822E-06	1.99553E-06	8.50624E-06	6.21689E-07	2.72264E-06	1.05193E-05	7.01542E-06	5.70188E-05	7.97517E-06	8.51792E-06	1.79151E-05	0	2.21724E-06
PWY-6545: pyrimidine deoxyribonucleotides de novo biosynthesis III	9.21314E-05	0.000174128	0.000101072	0.000125926	0.000156497	0.000219322	0.000169101	0.000164186	8.55498E-05	0.000144262	0.000217951	0.000119596	8.72989E-05	0.000147221
PWY-6549: L-glutamine biosynthesis III	4.44563E-05	3.64501E-05	1.40159E-05	2.3771E-05	3.90527E-05	5.94648E-05	2.70199E-05	1.64663E-05	0	1.88265E-05	2.08298E-05	1.77228E-05	8.86972E-06	2.51001E-05
PWY-6588: pyruvate fermentation to acetone	6.06529E-05	4.35838E-05	3.61294E-05	2.67643E-05	2.37427E-05	3.61087E-05	1.38794E-05	7.70965E-06	5.11818E-05	1.08082E-05	2.4496E-05	3.87923E-05	2.51283E-05	2.79827E-05
PWY-6590: superpathway of Clostridium acetobutylicum acidogenic fermentation	2.22584E-05	2.3731E-05	1.68017E-05	4.69815E-06	3.21769E-05	2.5482E-05	3.02471E-05	1.90716E-05	1.27675E-05	1.78464E-05	2.94953E-05	3.18103E-05	2.04366E-05	4.93185E-05
PWY-6595: superpathway of guanosine nucleotides degradation (plants)	9.04699E-06	2.8555E-05	1.28249E-05	1.67351E-05	1.21789E-05	4.22821E-05	9.89398E-06	1.62103E-05	5.27243E-05	2.71696E-05	2.26446E-05	2.83596E-05	4.28804E-06	2.10101E-05
PWY-6606: guanosine nucleotides degradation II	3.07844E-05	5.31068E-05	2.97052E-05	2.25843E-05	2.61016E-05	4.88404E-05	1.16734E-05	1.87361E-05	5.7819E-05	3.07657E-05	3.12484E-05	5.31453E-05	6.6583E-05	3.61205E-05
PWY-6608: guanosine nucleotides degradation III	0.00022844	0.000227984	0.000182932	0.000139838	0.000143941	0.000235813	0.000129235	8.8329E-05	0.000121501	0.000100913	0.000157671	0.000192736	0.000133538	0.000200819
PWY-6609: adenine and adenosine salvage III	0.00017469	0.000292521	0.000186529	0.000217513	0.000272575	0.000243036	0.000211304	0.000221972	0.000338925	0.000192643	0.000242849	0.000257164	0.00037535	0.000327987
PWY-6612: superpathway of tetrahydrofolate biosynthesis	7.78541E-05	6.27748E-05	6.39534E-05	5.87542E-05	4.07331E-05	7.32437E-05	4.45543E-05	3.11519E-05	2.97101E-05	4.91035E-05	3.22174E-05	5.67388E-05	1.56965E-05	3.19519E-05
PWY-6628: superpathway of L-phenylalanine biosynthesis	0.000150895	9.99269E-05	0.000172825	9.17128E-05	2.27898E-05	0.000126669	6.55616E-05	2.38656E-05	2.63246E-06	0	6.13459E-05	0	7.10067E-06	2.67741E-06
PWY-6629: superpathway of L-tryptophan biosynthesis	0.000144925	8.8448E-05	0.000116882	1.61578E-05	0	6.14489E-05	7.45204E-05	2.19063E-06	0	0	0	0	0	1.90991E-06
PWY-6630: superpathway of L-tyrosine biosynthesis	0.000147213	9.03419E-05	0.000177595	8.75152E-05	6.87656E-05	0.000116795	8.37495E-05	8.69058E-06	3.37963E-05	0	1.98196E-05	4.1354E-05	2.70722E-05	2.6788E-06
PWY-6690: cinnamate and 3-hydroxycinnamate degradation to 2-oxopent-4-enoate	4.35651E-05	8.20474E-06	2.83736E-05	5.29402E-07	2.36422E-07	2.38928E-06	7.91743E-06	0	0	0	0	0	0	0
PWY-6700: queuosine biosynthesis	0.00026353	0.000411083	0.000293967	0.000365295	0.000511068	0.000429568	0.00061542	0.000678673	0.000505944	0.000716343	0.000511077	0.00037423	0.000468955	0.000375354
PWY-6703: preQ0 biosynthesis	0.000165557	0.000275142	0.000175972	0.000268193	0.000282993	0.000290534	0.000289892	0.000359415	0.000361089	0.000326346	0.000310971	0.000208676	0.00031351	0.000268966
PWY-6708: ubiquinol-8 biosynthesis (prokaryotic)	3.51379E-05	2.33021E-05	4.75909E-05	6.71553E-06	4.29192E-06	2.31173E-05	1.56214E-05	8.71923E-07	0	0	9.49889E-07	0	0	0
PWY-6731: starch degradation III	1.40236E-05	1.36455E-06	4.03352E-06	1.18686E-05	0	2.27765E-06	7.00223E-06	1.65107E-06	0	0	0	0	0	0
PWY-6737: starch degradation V	0.000260812	0.000625862	0.000444298	0.000766502	0.000695688	0.000517426	0.000620229	0.000741483	0.000717716	0.000891391	0.000567212	0.000656586	0.000842865	0.000713121
PWY-6803: phosphatidylcholine acyl editing	9.39587E-05	3.36458E-05	6.88895E-05	1.37896E-05	7.54954E-06	3.33361E-05	2.55081E-05	1.06709E-06	0	0	0	0	0	7.92246E-07
PWY-6823: molybdenum cofactor biosynthesis	5.91565E-05	1.32366E-05	3.60381E-05	4.79559E-06	0	1.37938E-05	1.07887E-05	2.73871E-07	0	0	0	0	0	0
PWY-6859: all-trans-farnesol biosynthesis	6.79716E-05	1.27393E-05	4.59095E-05	8.89832E-06	1.3859E-05	2.33538E-05	1.50753E-05	2.3895E-06	0	0	1.73379E-05	0	0	2.15041E-05
PWY-6876: isopropanol biosynthesis	0	0	0	0	0	0	0	0	0	0	2.39809E-06	0	0	0
PWY-6891: thiazole biosynthesis II (Bacillus)	0.000107558	3.35436E-05	6.92103E-05	1.83128E-05	0	3.98785E-05	2.50896E-05	3.98124E-06	0	0	0	0	0	0
PWY-6892: thiazole biosynthesis I (E. coli)	0.000123401	0.000139921	0.000129656	5.74041E-05	0.000138189	0.000180819	0.000147221	1.01636E-05	0.000117188	0.000183496	9.29192E-05	4.49509E-05	6.28288E-05	9.94182E-05
PWY-6895: superpathway of thiamin diphosphate biosynthesis II	0.000145729	0.000114554	0.000146808	7.03811E-05	0	0.000121122	9.76009E-05	1.91776E-05	0	0	0	0	0	0
PWY-6897: thiamin salvage II	0.000152751	0.000264647	0.000171995	0.000228351	0.000258339	0.000215774	0.000291667	0.000357394	0.0002347	0.000349932	0.000219783	0.000193355	0.000264339	0.00019751
PWY-6901: superpathway of glucose and xylose degradation	0.000157044	0.00010417	0.000162111	8.26461E-05	0.0001023	0.000107709	8.50416E-05	4.1258E-05	0.000130582	3.53808E-05	5.54367E-05	8.21391E-05	3.85152E-05	3.78367E-05
PWY-6936: seleno-amino acid biosynthesis	0.000138127	0.000166387	0.000133063	8.24823E-05	0.000181178	0.000138143	0.000176044	0.000101211	0.000194242	0.000204339	0.000250528	0.000111359	0.000158045	0.000121447
PWY-6969: TCA cycle V (2-oxoglutarate:ferredoxin oxidoreductase)	0.000143989	8.1841E-05	0.000118157	8.0893E-05	0.000109536	9.35934E-05	8.22697E-05	4.48376E-05	8.0089E-06	4.11306E-05	7.58601E-05	3.41255E-05	1.63782E-05	1.72037E-05
PWY-7003: glycerol degradation to butanol	5.83471E-05	7.17301E-05	6.5894E-05	4.60924E-05	4.90737E-05	6.3943E-05	3.24611E-05	1.57839E-05	8.83817E-05	2.04722E-05	4.77691E-05	6.81095E-05	3.12779E-05	2.85865E-05
PWY-7013: L-1,2-propanediol degradation	0.000256062	4.98961E-05	0.000194359	5.34294E-06	4.37338E-06	1.06876E-05	2.38547E-05	0	0	0	3.7123E-07	0	0	0
PWY-7039: phosphatidate metabolism, as a signaling molecule	0	0	0	4.04826E-06	0	0	2.08897E-05	0	0	0	0	0	0	0
PWY-7111: pyruvate fermentation to isobutanol (engineered)	0.000324888	0.000623411	0.000379993	0.000652221	0.000561497	0.000552141	0.000578817	0.000646276	0.000589703	0.000617384	0.000504355	0.000558059	0.000669527	0.000626257
PWY-7115: C4 photosynthetic carbon assimilation cycle, NAD-ME type	9.41937E-05	0.04693	0.000115656	3.69746E-05	2.62926E-05	7.24864E-05	4.09177E-05	1.27686E-05	0	2.27985E-05	2.19747E-05	2.38744E-05	0	2.48892E-05
PWY-7117: C4 photosynthetic carbon assimilation cycle, PEPCK type	9.85252E-05	4.8097E-05	0.00015153	4.50904E-05	7.20577E-05	8.52607E-05	4.24354E-05	1.77593E-05	0	0.000106437	2.88087E-05	4.66642E-05	0	0.000172844
PWY-7184: pyrimidine deoxyribonucleotides de novo biosynthesis I	0.000121262	0.000209967	0.00011346	0.000128898	0.000196754	0.000229845	0.000168385	0.000166055	0.000178423	0.000143356	0.000238565	0.000120748	0.09005	0.000150162
PWY-7187: pyrimidine deoxyribonucleotides de novo biosynthesis II	0.000142381	0.000270331	0.000150837	0.000182409	0.000279115	0.000268524	0.000232669	0.000190575	0.000215492	0.000208346	0.000310192	0.00019919	0.000130551	0.000273485
PWY-7196: superpathway of pyrimidine ribonucleosides salvage	7.72167E-05	0.000161533	7.67969E-05	0.000139275	0.000170168	0.000181532	0.000108293	0.000117652	0.000233979	0.000197285	0.000152279	0.000157168	0.000138285	0.00015505
PWY-7197: pyrimidine deoxyribonucleotide phosphorylation	8.6993E-05	0.000178252	8.54603E-05	9.52511E-05	0.000161943	0.000184756	0.000137164	0.000125512	0.000140715	0.000123529	0.000226663	9.4115E-05	6.75117E-05	0.000117288
PWY-7198: pyrimidine deoxyribonucleotides de novo biosynthesis IV	6.97276E-07	3.51563E-06	1.58788E-06	1.34831E-05	8.44699E-06	0	4.92262E-05	4.09844E-06	6.10775E-05	1.40856E-05	5.27115E-06	8.66939E-06	5.08573E-06	1.24439E-05
PWY-7199: pyrimidine deoxyribonucleosides salvage	0.000126902	0.000135011	0.000115256	0.000155813	9.87439E-05	0.000147403	8.18393E-05	0.000129876	0.000147745	0.000155604	9.54706E-05	0.00012928	0.000179266	0.00013596
PWY-7204: pyridoxal 5'-phosphate salvage II (plants)	5.49052E-05	5.42044E-05	0.000115613	3.67683E-05	3.37585E-06	6.89094E-05	3.55255E-05	5.94213E-06	0	0	2.45143E-06	0	0	0
PWY-7208: superpathway of pyrimidine nucleobases salvage	0.000125226	0.0002647	0.000123025	0.000146218	0.000234183	0.000272658	0.000200996	0.00019642	0.000312905	0.00023342	0.000325645	0.000202931	0.000245198	0.000171488
PWY-7209: superpathway of pyrimidine ribonucleosides degradation	9.87246E-06	4.03104E-07	1.73539E-06	1.70424E-05	2.55152E-06	4.54602E-07	2.61451E-06	1.02568E-05	2.25831E-05	4.66734E-06	9.05504E-06	1.09402E-05	0	2.26882E-05
PWY-7210: pyrimidine deoxyribonucleotides biosynthesis from CTP	9.92896E-07	4.97315E-06	2.24999E-06	1.80937E-05	1.17697E-05	0	6.04184E-05	5.76385E-06	7.21975E-05	1.90476E-05	7.43637E-06	1.18684E-05	7.01378E-06	1.69719E-05
PWY-7211: superpathway of pyrimidine deoxyribonucleotides de novo biosynthesis	9.47199E-05	0.000171451	9.25141E-05	0.000102097	0.000182684	0.000169106	0.000109316	0.000137666	0.000185351	7.94079E-05	0.0001697	0.000100132	0.000119254	0.000125266
PWY-7219: adenosine ribonucleotides de novo biosynthesis	0.000438753	0.000820294	0.00056528	0.000926842	0.000967246	0.000759786	0.000948557	0.00103898	0.000836395	0.00111103	0.000896277	0.000913288	0.000940987	0.00101981
PWY-7220: adenosine deoxyribonucleotides de novo biosynthesis II	0.000155521	0.000198902	0.000133878	0.000156578	0.000217195	0.000231974	0.000190299	0.000137884	0.000203694	0.000129349	0.000200349	0.000152992	0.000110811	0.000194978
PWY-7221: guanosine ribonucleotides de novo biosynthesis	0.000294695	0.000626223	0.000405365	0.000634392	0.000650299	0.000544993	0.000687939	0.000697765	0.00061767	0.000836516	0.000564035	0.000586206	0.000607569	0.000669384
PWY-7222: guanosine deoxyribonucleotides de novo biosynthesis II	0.000155521	0.000198902	0.000133878	0.000156578	0.000217195	0.000231974	0.000190299	0.000137884	0.000203694	0.000129349	0.000200349	0.000152992	0.000110811	0.000194978
PWY-7228: superpathway of guanosine nucleotides de novo biosynthesis I	0.000151222	0.000272564	0.000145305	0.000170412	0.000252543	0.000291348	0.000225616	0.000227077	0.00025192	0.000193754	0.000309244	0.000157573	0.000125722	0.000194114
PWY-7229: superpathway of adenosine nucleotides de novo biosynthesis I	0.000284492	0.000410969	0.000278899	0.000353401	0.000459207	0.000433471	0.000419582	0.000340772	0.000414335	0.000323399	0.000427103	0.000362945	0.000275088	0.000440694
PWY-7234: inosine-5'-phosphate biosynthesis III	0.000130798	0.000124276	0.000156619	8.63393E-05	0.00013583	8.72277E-05	5.07083E-05	6.36569E-05	8.6107E-05	3.73299E-05	0.000101039	6.54714E-05	4.03357E-05	6.61885E-05
PWY-7235: superpathway of ubiquinol-6 biosynthesis (eukaryotic)	7.45055E-07	0	1.55509E-05	5.63784E-07	9.00293E-07	0	0	0	0.001645	0	3.16391E-06	9.40969E-07	0	0
PWY-7237: myo-, chiro- and scillo-inositol degradation	2.98103E-05	5.0915E-05	2.11961E-05	2.31114E-05	5.1372E-05	3.78788E-05	2.90815E-05	1.38961E-05	0.000168821	5.96162E-05	1.71863E-05	4.10271E-05	6.05379E-05	2.14004E-05
PWY-7242: D-fructuronate degradation	0.000160473	0.000127322	0.000147652	0.000118441	6.98905E-05	0.000113124	0.000137439	8.38638E-05	0.000110056	0.000147286	9.0516E-05	7.83552E-05	0.000224648	0.00020787
PWY-724: superpathway of L-lysine, L-threonine and L-methionine biosynthesis II	0.000188558	0.000394704	0.000276362	0.000408148	0.000422006	0.000341427	0.000369371	0.000355173	0.000351396	0.000452937	0.000380675	0.000376232	0.000424078	0.000454623
PWY-7254: TCA cycle VII (acetate-producers)	0.000101894	3.46617E-05	7.45381E-05	1.41595E-05	6.16008E-06	3.53E-05	2.45033E-05	3.04973E-06	0	0	1.8829E-06	0	0	5.78325E-07
PWY-7269: NAD/NADP-NADH/NADPH mitochondrial interconversion (yeast)	0.000121624	2.89124E-05	8.18476E-05	1.31439E-05	6.5531E-06	3.16403E-05	2.33416E-05	3.29494E-07	0	0	0	0	0	4.27523E-07
PWY-7279: aerobic respiration II (cytochrome c) (yeast)	9.13484E-07	0	0	0	1.56577E-06	2.49373E-06	0	1.96126E-06	0	0	0	0	0	0
PWY-7282: 4-amino-2-methyl-5-phosphomethylpyrimidine biosynthesis (yeast)	8.04413E-05	0.000169718	0.000150271	0.000247091	0.000187003	0.000191898	9.52753E-05	0.000117327	0.000249017	8.0501E-05	0.000213895	0.000149978	0.00026072	4.99937E-05
PWY-7286: 7-(3-amino-3-carboxypropyl)-wyosine biosynthesis	1.2896E-06	0	0	0	1.17219E-05	6.29311E-07	0	0	0	0	9.0431E-06	0	0	2.57844E-05
PWY-7315: dTDP-N-acetylthomosamine biosynthesis	0.000106101	2.49376E-05	7.64052E-05	1.43708E-05	8.18498E-07	3.70521E-05	2.66011E-05	2.59735E-07	0	0	1.85164E-07	0	0	0
PWY-7323: superpathway of GDP-mannose-derived O-antigen building blocks biosynthesis	9.49734E-05	3.26808E-05	7.40382E-05	3.01385E-05	1.2874E-05	3.86833E-05	3.35423E-05	2.60318E-05	9.51509E-05	1.42561E-05	2.16116E-05	3.24881E-05	1.92026E-05	8.58016E-06
PWY-7328: superpathway of UDP-glucose-derived O-antigen building blocks biosynthesis	5.99648E-05	1.90161E-05	5.18789E-05	1.53269E-05	0	3.2779E-05	2.68628E-05	6.74155E-06	1.76004E-05	3.43421E-06	6.10026E-06	6.10827E-06	6.70767E-06	3.99901E-06
PWY-7357: thiamin formation from pyrithiamine and oxythiamine (yeast)	0.000189186	0.000371106	0.000184114	0.00033171	0.000314686	0.000268972	0.000327754	0.000404418	0.000293918	0.00037951	0.00025015	0.000290851	0.000369618	0.000485758
PWY-7371: 1,4-dihydroxy-6-naphthoate biosynthesis II	1.72084E-06	0	1.48465E-05	7.9239E-07	2.40274E-06	3.88043E-06	0	1.54086E-06	2.60328E-06	1.13796E-06	1.53937E-05	1.48427E-06	0	0
PWY-7383: anaerobic energy metabolism (invertebrates, cytosol)	0.000116577	0.000163447	0.000112314	0.000126541	0.000145862	0.000187541	0.000135646	4.2268E-05	8.67006E-06	7.02681E-05	0.000165783	0.000134757	3.43834E-05	0.000121648
PWY-7388: octanoyl-[acyl-carrier protein] biosynthesis (mitochondria, yeast)	0.000115193	2.99107E-05	7.21769E-05	1.93563E-05	3.93718E-05	3.05654E-05	2.10776E-05	7.33517E-06	8.55489E-06	3.60496E-06	1.19337E-06	1.45009E-06	2.12897E-06	6.14565E-06
PWY-7391: isoprene biosynthesis II (engineered)	0	0	0	0	0	0.0006894	0	0	0	0	6.4084E-06	0	0	0
PWY-7392: taxadiene biosynthesis (engineered)	4.90222E-05	3.37674E-05	3.84956E-05	2.44282E-05	2.24529E-05	3.92462E-05	3.83393E-05	6.93833E-06	0	0	4.03167E-05	0	0	5.36632E-05
PWY-7399: methylphosphonate degradation II	0	0	0	0	0	8.71656E-07	0	0	0	0	0	0	0	0
PWY-7400: L-arginine biosynthesis IV (archaebacteria)	0.000280734	0.000311701	0.000335297	0.000311702	0.000212043	0.000323762	0.00030147	0.000282479	0.000247517	0.000251441	0.00018991	0.000185485	0.000343737	0.00020398
PWY-7409: phospholipid remodeling (phosphatidylethanolamine, yeast)	8.46459E-05	1.04976E-05	4.97844E-05	9.45825E-06	5.62436E-07	2.44631E-05	1.17537E-05	0	0	0	0	0	0	0
PWY-7431: aromatic biogenic amine degradation (bacteria)	0	0	0	0	0	1.03294E-06	0	0	0	0	0	0	0	0
PWY-7446: sulfoglycolysis	6.66915E-05	6.50962E-07	4.01249E-05	1.27424E-06	2.11752E-07	4.6991E-06	7.55132E-06	5.00707E-07	0	0	0	0	0	0
PWY-7456: mannan degradation	2.0185E-05	5.3461E-05	6.03124E-05	0.000167827	9.74507E-05	0.00010738	3.21733E-05	0.000120384	0	0.000164275	0.000103208	0.000117553	6.36847E-05	8.6905E-05
PWY-7539: 6-hydroxymethyl-dihydropterin diphosphate biosynthesis III (Chlamydia)	4.04189E-05	4.33535E-05	6.59483E-05	4.66149E-05	3.27415E-05	4.32647E-05	3.74258E-05	4.65435E-05	7.94455E-06	2.7474E-05	4.86626E-05	4.43945E-05	1.96171E-05	5.55761E-05
PWY-7560: methylerythritol phosphate pathway II	0.000201547	0.000132981	0.00024092	0.000108836	9.71212E-05	0.000171194	0.00013712	0.000164163	0.000135706	7.39925E-06	0.000160027	3.27571E-05	8.59096E-05	0.000105464
PWY-7663: gondoate biosynthesis (anaerobic)	0.000159803	0.000222091	0.00020488	0.000192797	0.000263279	0.000244527	0.000348845	0.000519812	0.000308125	0.000478231	0.000274618	0.000199289	0.000203564	6.81064E-05
PWY-7664: oleate biosynthesis IV (anaerobic)	0.000124392	4.16609E-05	9.06402E-05	2.7451E-05	5.47599E-05	4.29931E-05	3.34249E-05	1.09337E-05	1.26357E-05	5.38628E-06	0.001985	2.16602E-06	3.17394E-06	8.72944E-06
PWY-821: superpathway of sulfur amino acid biosynthesis (Saccharomyces cerevisiae)	1.56918E-05	3.92147E-05	6.39353E-05	1.68793E-05	7.42546E-06	4.89864E-05	9.68189E-06	3.90493E-06	0	1.54603E-06	2.99389E-05	0	0	1.0648E-05
PWY-841: superpathway of purine nucleotides de novo biosynthesis I	0.000161352	0.000310752	0.000180044	0.000204908	0.000304856	0.000315204	0.000231618	0.000220828	0.000222846	0.000238996	0.000293847	0.00019576	0.000163419	0.000256468
PWY-922: mevalonate pathway I	0	1.97095E-06	3.44605E-06	4.3731E-06	6.78913E-07	1.41776E-06	8.62193E-07	5.09593E-07	7.09782E-07	0	7.80068E-06	0	0	0
PWY0-1061: superpathway of L-alanine biosynthesis	0.000148094	8.64778E-05	0.000163339	5.54321E-05	3.03356E-05	0.000102577	8.09038E-05	1.69494E-05	1.87939E-05	2.56516E-05	3.04462E-05	2.94492E-05	2.15714E-05	2.73025E-05
PWY0-1241: ADP-L-glycero-&beta;-D-manno-heptose biosynthesis	7.33508E-05	1.85449E-05	4.10754E-05	7.70196E-06	4.05905E-06	2.25412E-05	1.64761E-05	1.38342E-06	0	3.91589E-07	0	0	0	0
PWY0-1261: anhydromuropeptides recycling	0.000188293	7.85984E-05	0.000147508	5.20461E-05	1.94506E-05	9.95042E-05	6.20112E-05	4.52273E-05	6.41832E-05	2.52932E-05	2.80179E-05	4.09715E-05	2.72633E-05	2.47024E-05
PWY0-1277: 3-phenylpropanoate and 3-(3-hydroxyphenyl)propanoate degradation	6.26098E-05	1.15053E-05	3.85014E-05	1.34134E-06	0	4.2078E-06	1.37008E-05	0	0	0	0	0	0	0
PWY0-1296: purine ribonucleosides degradation	0.000244482	0.000435348	0.000308172	0.000539469	0.000430344	0.000296747	0.00038664	0.000403284	0.000473283	0.000367396	0.000400232	0.000501465	0.000524105	0.000493046
PWY0-1297: superpathway of purine deoxyribonucleosides degradation	0.000167614	9.6273E-05	0.000138696	6.73433E-05	5.19278E-05	8.57612E-05	5.82797E-05	5.2107E-05	0.000127891	3.07866E-05	4.31099E-05	4.90247E-05	0.000153953	5.13753E-05
PWY0-1298: superpathway of pyrimidine deoxyribonucleosides degradation	9.81061E-05	3.34541E-05	6.99451E-05	2.09077E-05	2.89662E-05	2.77075E-05	3.32267E-05	1.53502E-05	0.00010556	4.45232E-05	1.75357E-05	3.56259E-05	4.83497E-05	2.35174E-05
PWY0-1319: CDP-diacylglycerol biosynthesis II	0.000297714	0.00049506	0.00038594	0.000593317	0.000507505	0.000407175	0.000568066	0.000580267	0.000612283	0.000682826	0.000500396	0.00057406	0.000622585	0.000575136
PWY0-1338: polymyxin resistance	5.94082E-05	1.25466E-05	3.29197E-05	3.74325E-06	4.23903E-07	8.27317E-06	7.7335E-06	5.81469E-07	0	0	1.22347E-07	0	0	0
PWY0-1415: superpathway of heme biosynthesis from uroporphyrinogen-III	2.89905E-05	1.90875E-05	3.12027E-05	6.91893E-06	7.84659E-07	5.49905E-06	9.31968E-06	5.20204E-06	0	0	7.00759E-06	0	0	1.09861E-06
PWY0-1479: tRNA processing	7.03943E-07	2.70705E-06	1.67386E-06	0	4.86756E-06	3.10917E-07	2.79752E-06	6.28727E-06	1.05011E-05	4.16869E-06	1.73186E-06	1.3901E-05	6.71054E-06	0
PWY0-1533: methylphosphonate degradation I	7.47022E-05	1.22927E-05	3.09743E-05	4.56055E-06	4.45332E-07	1.2721E-05	8.89826E-06	3.35662E-07	0	0	0	0	0	0
PWY0-1586: peptidoglycan maturation (meso-diaminopimelate containing)	0.000356441	0.000140008	0.000224396	0.00011118	0.000110893	0.000108922	0.000164807	8.8033E-05	0.000120732	9.30335E-05	0.000186526	0.000102073	0.000113156	9.61305E-05
PWY0-162: superpathway of pyrimidine ribonucleotides de novo biosynthesis	0.000161491	0.000204161	0.000159578	0.000179405	0.000208082	0.0001916	0.000111019	0.000253744	0.000324425	0.000269727	0.000209563	0.000209884	0.00018546	0.00020506
PWY0-166: superpathway of pyrimidine deoxyribonucleotides de novo biosynthesis (E. coli)	0.00014988	0.000262137	0.000154769	0.00018388	0.000267612	0.000270211	0.000225821	0.000200697	0.00021146	0.000200925	0.000301479	0.000185664	0.00012689	0.00022716
PWY0-321: phenylacetate degradation I (aerobic)	0	1.02582E-05	0	5.06862E-07	0	1.67743E-06	6.3276E-06	0	0	0	0	0	0	0
PWY0-41: allantoin degradation IV (anaerobic)	7.12887E-06	7.50346E-06	1.94611E-05	4.38322E-06	0	0.01093	1.03338E-05	2.79141E-07	0	0	0	0	0	0
PWY0-42: 2-methylcitrate cycle I	1.24679E-05	5.31224E-06	3.67651E-06	6.71007E-07	1.86768E-06	8.85233E-07	2.57481E-06	0	0	0	0	0	0	0
PWY0-781: aspartate superpathway	0.000114031	9.6702E-05	0.000130868	7.70369E-05	4.37818E-05	0.000104974	9.34956E-05	7.84897E-05	5.2145E-05	2.73241E-05	6.8938E-05	6.75718E-05	5.4434E-05	5.88226E-05
PWY0-845: superpathway of pyridoxal 5'-phosphate biosynthesis and salvage	4.51564E-05	9.4839E-05	0.000121526	0.000181447	0.000112724	0.000146171	4.58027E-05	5.87634E-05	0.000199861	3.55788E-05	0.00017464	8.1146E-05	0.000183666	1.91404E-05
PWY0-862: (5Z)-dodec-5-enoate biosynthesis	0.000123544	3.67351E-05	8.29141E-05	2.40046E-05	4.84201E-05	3.81583E-05	3.96211E-05	9.40079E-06	1.08928E-05	4.62475E-06	2.55962E-06	1.85943E-06	2.72648E-06	7.62053E-06
PWY0-881: superpathway of fatty acid biosynthesis I (E. coli)	0	7.27212E-06	0	0	0	0	0	0	0	0	0	0	0	0
PWY490-3: nitrate reduction VI (assimilatory)	8.64134E-06	1.95539E-06	3.0467E-06	2.46828E-06	3.33682E-06	1.9963E-06	4.93011E-06	2.87485E-06	2.3395E-05	1.08342E-06	2.14925E-06	1.68674E-05	1.94025E-05	8.08651E-06
PWY4FS-7: phosphatidylglycerol biosynthesis I (plastidic)	0.000227744	0.000119205	0.00021681	8.37171E-05	6.06157E-05	0.000129023	0.000230795	0.000353089	0.000106818	1.61605E-05	7.4446E-05	5.39638E-05	1.51884E-05	9.76019E-06
PWY4FS-8: phosphatidylglycerol biosynthesis II (non-plastidic)	0.000227744	0.000119205	0.00021681	8.37171E-05	6.06157E-05	0.000129023	0.000230795	0.000353089	0.000106818	1.61605E-05	7.4446E-05	5.39638E-05	1.51884E-05	9.76019E-06
PWY4LZ-257: superpathway of fermentation (Chlamydomonas reinhardtii)	8.95697E-05	6.11257E-05	5.60353E-05	1.5383E-05	4.06296E-05	2.72293E-05	4.3452E-05	0.01126	2.88829E-05	1.94257E-05	1.48983E-05	2.40196E-05	2.0017E-05	1.52637E-05
PWY66-389: phytol degradation	1.39186E-06	1.26833E-05	7.55404E-07	2.25728E-06	4.76921E-06	0	0.0007448	0	0	0	4.46267E-07	0	0	0
PWY66-398: TCA cycle III (animals)	3.47557E-06	1.43026E-06	0	1.6681E-06	7.40256E-07	2.52913E-05	4.29513E-06	7.83721E-07	0	0	1.44317E-05	0	0	0.0008597
PWY66-399: gluconeogenesis III	0.000107274	0.000110697	0.00013271	0.000101277	0.000136937	0.000109286	0.00010516	3.21556E-05	1.71429E-05	3.01966E-05	0.000148991	0.0001059	3.65918E-05	3.93965E-05
PWY66-400: glycolysis VI (metazoan)	0.000247575	0.000137512	0.000270962	0.000102536	0.00016966	0.000150263	0.000124987	3.50345E-05	0.000155177	3.13696E-05	0.000216329	0.000126979	3.79909E-05	3.27083E-05
PWY66-409: superpathway of purine nucleotide salvage	0.000177166	0.00018462	0.00016972	0.000126238	4.20328E-05	0.000171942	0.000123876	0.000114955	0.000216644	7.39454E-05	0.000103015	0.000102018	0.000183526	0.000113009
PWY66-422: D-galactose degradation V (Leloir pathway)	0.000156008	0.000350072	0.000263249	0.000379577	0.000328729	0.000238566	0.000324459	0.000347411	0.000389395	0.000495844	0.000275843	0.000373545	0.000426677	0.000417975
PWYG-321: mycolate biosynthesis	0.000126609	4.32225E-05	9.40322E-05	2.86899E-05	5.66303E-05	4.43976E-05	3.16011E-05	1.13317E-05	1.31016E-05	5.58972E-06	1.85482E-06	2.25109E-06	3.29883E-06	9.15325E-06
PYRIDNUCSAL-PWY: NAD salvage pathway I	6.76017E-05	6.0382E-05	9.52311E-05	6.47691E-05	2.21845E-05	8.65569E-05	5.86224E-05	6.2075E-05	0.000117031	1.84568E-05	5.82107E-05	0	3.81763E-05	7.59404E-05
PYRIDNUCSYN-PWY: NAD biosynthesis I (from aspartate)	0.000144663	0.000202168	0.000159275	0.000172009	0.000223089	0.000216235	0.000186597	0.00019339	0.000203714	0.000303442	0.000208796	0.000173017	0.000120914	0.00020627
PYRIDOXSYN-PWY: pyridoxal 5'-phosphate biosynthesis I	0.00011011	7.63167E-05	0.000103226	0.000140118	9.39663E-05	0.000123732	3.99144E-05	4.65547E-05	0.000154799	2.68049E-05	0.000135779	6.23192E-05	0.000143048	1.39935E-05
REDCITCYC: TCA cycle VIII (helicobacter)	7.44453E-05	3.2865E-05	6.5018E-05	1.88074E-05	1.02052E-05	3.21163E-05	2.09045E-05	3.76037E-06	0	2.38396E-06	2.16091E-06	0	0	6.86236E-07
RHAMCAT-PWY: L-rhamnose degradation I	0.000129665	9.80847E-05	0.000121543	0.000191534	0.000166728	0.000121089	0.000119634	0.000125697	0.000192402	9.88946E-05	9.26393E-05	0.000123382	0.000166688	0.000128368
RIBOSYN2-PWY: flavin biosynthesis I (bacteria and plants)	0.000182165	0.000105851	0.000181776	0.000154593	9.87742E-05	0.000172469	0.000102983	1.54584E-05	0.000133202	0.000177062	6.64329E-05	2.17046E-05	5.13737E-06	0.000177857
RUMP-PWY: formaldehyde oxidation I	0	9.97113E-06	0	0	2.48483E-06	2.82009E-06	4.40457E-07	0	0	0	6.33448E-07	0	1.28631E-06	6.96254E-06
SALVADEHYPOX-PWY: adenosine nucleotides degradation II	0.000212164	0.000209597	0.000164953	0.000125039	0.000127627	0.000220272	0.000116923	7.6819E-05	0.000108268	9.07411E-05	0.000145706	0.00018359	0.000118955	0.000189116
SER-GLYSYN-PWY: superpathway of L-serine and glycine biosynthesis I	0.000161256	0.000224657	0.000159216	0.000199353	0.000201582	0.000164145	0.0001833	0.000155826	0.000233033	0.000243392	0.000178364	0.000223968	0.000239107	0.000284005
SO4ASSIM-PWY: sulfate reduction I (assimilatory)	0.000107322	5.98739E-05	9.14029E-05	2.55304E-05	1.55924E-05	7.5469E-05	4.79011E-05	3.42062E-06	1.37984E-05	2.10341E-05	0.000111761	1.97612E-05	1.73688E-06	3.40393E-05
SULFATE-CYS-PWY: superpathway of sulfate assimilation and cysteine biosynthesis	0.000123912	9.72861E-05	0.000107753	4.77438E-05	3.14696E-05	0.000106735	7.81777E-05	7.30128E-06	2.72423E-05	4.06293E-05	0.000129074	3.92965E-05	3.86735E-06	6.50568E-05
TCA-GLYOX-BYPASS: superpathway of glyoxylate bypass and TCA	0.00011548	3.77976E-05	9.33964E-05	2.84471E-05	5.66591E-06	5.09107E-05	3.37481E-05	4.51322E-06	0	0	2.43969E-06	0	0	9.93967E-07
TCA: TCA cycle I (prokaryotic)	0.000157741	7.56063E-05	0.000128878	7.88824E-05	0.000107821	9.73029E-05	9.1824E-05	4.96362E-05	9.57168E-06	4.36419E-05	8.71163E-05	3.85159E-05	1.8679E-05	1.99879E-05
TEICHOICACID-PWY: teichoic acid (poly-glycerol) biosynthesis	5.4791E-08	4.30097E-07	0	0	5.12697E-07	0	0	3.86619E-06	0	0	0	0	0	0
THISYN-PWY: superpathway of thiamin diphosphate biosynthesis I	0.000150982	0.000238295	0.000183003	0.000147686	0.000235731	0.000230044	0.000275263	4.63247E-05	0.000215003	0.000346154	0.000193133	0.000120584	0.000167072	0.00017072
THISYNARA-PWY: superpathway of thiamin diphosphate biosynthesis III (eukaryotes)	0.000143761	0.000154046	0.000114598	0.000127259	0.000123543	9.92054E-05	9.78169E-05	0.000161139	0.000159157	0.000174811	0.00010137	0.000154516	0.000217914	0.000159266
THRESYN-PWY: superpathway of L-threonine biosynthesis	0.000201866	0.000280935	0.000234737	0.000229334	0.000235235	0.000251306	0.000238254	0.000221622	0.000260808	0.000256095	0.000217793	0.000219512	0.000304942	0.000330997
TRNA-CHARGING-PWY: tRNA charging	0.000264915	0.000484092	0.000270095	0.000381853	0.000571773	0.000452408	0.000464204	0.000332271	0.000334386	0.000470124	0.000577214	0.000472666	0.000335657	0.000568936
TRPSYN-PWY: L-tryptophan biosynthesis	0.00012078	0.000218033	0.000141278	0.000170465	0.000231774	0.000215706	0.000166207	0.000230918	0.000297203	0.000256645	0.00014485	0.000228812	0.000287384	0.000263896
UBISYN-PWY: superpathway of ubiquinol-8 biosynthesis (prokaryotic)	3.85767E-05	2.11404E-05	4.75484E-05	6.6637E-06	0	2.00836E-05	1.45993E-05	9.03296E-07	0	0	4.38894E-07	0	0	0
UDPNAGSYN-PWY: UDP-N-acetyl-D-glucosamine biosynthesis I	0.000152786	7.3989E-05	0.000139778	9.85257E-05	4.96272E-05	0.000128937	5.75229E-05	6.93794E-05	9.07787E-05	0.000199208	3.7234E-05	2.28596E-05	3.77088E-05	5.86534E-05
UNINTEGRATED	0.596911	0.456235	0.619934	0.604056	0.416707	0.46445	0.496209	0.575157	0.604746	0.513113	0.480459	0.478633	0.598599	0.448836
UNMAPPED	0.363697	0.497604	0.338378	0.35284	0.541681	0.49154	0.460621	0.384965	0.351843	0.443178	0.478733	0.483675	0.360661	0.507555
URDEGR-PWY: superpathway of allantoin degradation in plants	2.72394E-06	8.88845E-06	1.6781E-05	8.69862E-06	0	1.64111E-05	9.58057E-06	3.41366E-07	0	0	0	0	0	0
VALSYN-PWY: L-valine biosynthesis	0.000256534	0.000623411	0.000379993	0.000652221	0.000561497	0.000552141	0.000578817	0.000646276	0.000589703	0.000617384	0.000504355	0.000558059	0.000669527	0.000626257

## Sheet: Stratified data (this study)
Table S3f: Metagenomic stratified relative abundance resulting for the data generated in this study.
# Pathway	MT.1.0	MT.1.6	MT.10.0	MT.10.6	GB.1.0	GB.1.6	GB.4.0	GB.4.6	SG.1.0	SG.1.6	SG.2.0	SG.2.6
1CMET2-PWY: N10-formyl-tetrahydrofolate biosynthesis|g__Akkermansia.s__Akkermansia_muciniphila	8.03509E-06	0.002214	0	2.86004E-07	0	0	5.28507E-07	6.48525E-05	8.17027E-07	4.90966E-06	0	1.06541E-06
1CMET2-PWY: N10-formyl-tetrahydrofolate biosynthesis|g__Bacteroides.s__Bacteroides_caccae	2.74411E-06	0	0	0	0	0	1.82739E-06	3.93845E-06	0.002583	7.60004E-06	0	0
1CMET2-PWY: N10-formyl-tetrahydrofolate biosynthesis|g__Bacteroides.s__Bacteroides_cellulosilyticus	0	0	0	6.81018E-06	0	0	0	0	0	0	2.16594E-06	2.19103E-05
1CMET2-PWY: N10-formyl-tetrahydrofolate biosynthesis|g__Bacteroides.s__Bacteroides_clarus	0	0	0	0	0	4.26119E-06	0	0	0	0	0	0
1CMET2-PWY: N10-formyl-tetrahydrofolate biosynthesis|g__Bacteroides.s__Bacteroides_coprophilus	0	0	0	0	0	0	0	0	1.31467E-05	1.24324E-05	0	0
1CMET2-PWY: N10-formyl-tetrahydrofolate biosynthesis|g__Bacteroides.s__Bacteroides_faecis	0	0	1.72147E-05	0	0	0	0	0	3.1331E-06	8.89794E-06	0	0
1CMET2-PWY: N10-formyl-tetrahydrofolate biosynthesis|g__Bacteroides.s__Bacteroides_finegoldii	1.49178E-06	6.4466E-06	1.65379E-06	0	0	0	0	0	1.99617E-06	5.52544E-06	0	0
1CMET2-PWY: N10-formyl-tetrahydrofolate biosynthesis|g__Bacteroides.s__Bacteroides_fragilis	0	0	3.00479E-06	0	0	1.50781E-05	1.03994E-05	1.31915E-05	0	0	5.80128E-06	0
1CMET2-PWY: N10-formyl-tetrahydrofolate biosynthesis|g__Bacteroides.s__Bacteroides_intestinalis	0	0	1.36264E-06	0	0	0	0	0	0	0	0	0
1CMET2-PWY: N10-formyl-tetrahydrofolate biosynthesis|g__Bacteroides.s__Bacteroides_massiliensis	1.31297E-05	9.43306E-05	0	0	0	0	0	0	9.25419E-06	4.13081E-06	0	0
1CMET2-PWY: N10-formyl-tetrahydrofolate biosynthesis|g__Bacteroides.s__Bacteroides_ovatus	2.62379E-06	0	1.79464E-05	0	0	0	0	0	5.2897E-06	7.11353E-06	6.92952E-05	2.22027E-05
1CMET2-PWY: N10-formyl-tetrahydrofolate biosynthesis|g__Bacteroides.s__Bacteroides_sp_2_1_22	0	0	0	0	0	0	0	0	2.71577E-07	5.50419E-07	0	0
1CMET2-PWY: N10-formyl-tetrahydrofolate biosynthesis|g__Bacteroides.s__Bacteroides_stercoris	1.98346E-06	2.07589E-05	4.99313E-05	0	0	0	0	5.33543E-07	0.000106529	1.62269E-05	0	0
1CMET2-PWY: N10-formyl-tetrahydrofolate biosynthesis|g__Bacteroides.s__Bacteroides_thetaiotaomicron	2.92289E-06	0	1.12359E-06	0	0	1.38455E-05	7.71145E-07	2.16277E-06	0	0	4.44138E-06	5.5034E-06
1CMET2-PWY: N10-formyl-tetrahydrofolate biosynthesis|g__Bacteroides.s__Bacteroides_uniformis	2.71078E-06	5.11408E-05	1.76928E-05	1.28058E-05	0	2.46429E-05	2.25528E-05	1.34247E-05	3.66609E-05	4.56464E-05	1.93474E-05	6.25811E-05
1CMET2-PWY: N10-formyl-tetrahydrofolate biosynthesis|g__Bacteroides.s__Bacteroides_xylanisolvens	0	0	1.04584E-05	4.48961E-07	0	3.87126E-06	8.83248E-06	1.87047E-06	0	6.95452E-07	0	0
1CMET2-PWY: N10-formyl-tetrahydrofolate biosynthesis|g__Escherichia.s__Escherichia_coli	0	3.72979E-07	9.34299E-07	0	6.81695E-07	6.65629E-06	0	3.81733E-06	0	0	0	1.55975E-07
1CMET2-PWY: N10-formyl-tetrahydrofolate biosynthesis|g__Klebsiella.s__Klebsiella_pneumoniae	0	0	0	0	0	1.27088E-07	0	1.49869E-06	0	0	0	0
1CMET2-PWY: N10-formyl-tetrahydrofolate biosynthesis|g__Lactococcus.s__Lactococcus_lactis	0	0	0	3.57199E-07	0	0	0	0	0	0	0	4.17893E-07
1CMET2-PWY: N10-formyl-tetrahydrofolate biosynthesis|g__Parabacteroides.s__Parabacteroides_distasonis	3.36648E-06	0	1.94804E-05	2.29718E-06	0	2.59738E-06	3.72115E-06	7.48342E-06	2.81386E-06	3.85093E-06	0	1.86808E-06
1CMET2-PWY: N10-formyl-tetrahydrofolate biosynthesis|g__Parabacteroides.s__Parabacteroides_johnsonii	0	0	0	0	0	1.34756E-06	5.2547E-07	5.06777E-07	0	0	0	0
1CMET2-PWY: N10-formyl-tetrahydrofolate biosynthesis|g__Parabacteroides.s__Parabacteroides_merdae	7.31556E-06	1.50983E-05	1.71918E-06	0	0	1.85564E-06	3.08767E-06	3.56485E-06	3.55939E-06	6.01803E-06	1.24195E-05	8.53186E-06
1CMET2-PWY: N10-formyl-tetrahydrofolate biosynthesis|g__Parabacteroides.s__Parabacteroides_sp_D13	0	0	0	0	0	2.07556E-06	0	0	0	0	0	0
1CMET2-PWY: N10-formyl-tetrahydrofolate biosynthesis|g__Streptococcus.s__Streptococcus_parasanguinis	0	0	0	0	0	2.63339E-06	0	1.02312E-06	0	0	0	1.89753E-06
1CMET2-PWY: N10-formyl-tetrahydrofolate biosynthesis|unclassified	3.69521E-05	1.22823E-05	2.07388E-05	0	4.37773E-05	3.77441E-05	5.60863E-05	3.09881E-05	2.68807E-05	2.03035E-05	1.23878E-05	2.35271E-05
3-HYDROXYPHENYLACETATE-DEGRADATION-PWY: 4-hydroxyphenylacetate degradation|g__Escherichia.s__Escherichia_coli	0	8.09918E-07	1.93441E-06	0	0	0	0	4.85059E-07	0	0	2.00549E-07	3.40092E-07
7ALPHADEHYDROX-PWY: cholate degradation (bacteria, anaerobic)|g__Lachnospiraceae_noname.s__Lachnospiraceae_bacterium_5_1_57FAA	0	0	0	0	0	0	0	0	0	0	0	6.22964E-07
AEROBACTINSYN-PWY: aerobactin biosynthesis|g__Escherichia.s__Escherichia_coli	0	0	5.11066E-08	0	1.44642E-06	0	1.54756E-07	3.18239E-07	0	0	9.37537E-08	4.04391E-07
AEROBACTINSYN-PWY: aerobactin biosynthesis|g__Shigella.s__Shigella_flexneri	0	0	0	0	0	0	0	0	0	0	0	2.0016E-07
ANAEROFRUCAT-PWY: homolactic fermentation|g__Escherichia.s__Escherichia_coli	0	0	9.35881E-07	0	0	1.18732E-05	0	0	0	0	0	0
ANAEROFRUCAT-PWY: homolactic fermentation|g__Lactococcus.s__Lactococcus_lactis	0	0	0	0	0	0	0	0	0	0	0	4.49893E-07
ANAEROFRUCAT-PWY: homolactic fermentation|unclassified	0	1.65062E-05	3.6728E-05	1.69989E-05	0	4.2167E-05	3.02779E-05	6.39382E-05	4.20433E-05	4.12953E-05	5.09873E-06	1.00186E-05
ANAGLYCOLYSIS-PWY: glycolysis III (from glucose)|g__Alistipes.s__Alistipes_senegalensis	5.33558E-07	0	0	0	0	0	2.76237E-07	0	0	0	0	0
ANAGLYCOLYSIS-PWY: glycolysis III (from glucose)|g__Alistipes.s__Alistipes_shahii	3.55633E-06	0	0	4.08545E-06	0	1.27383E-05	0	2.19807E-05	9.18457E-06	2.35074E-05	0	0
ANAGLYCOLYSIS-PWY: glycolysis III (from glucose)|g__Bacteroides.s__Bacteroides_ovatus	5.03835E-06	5.18644E-05	2.10008E-05	1.35076E-06	0	1.53374E-06	2.72012E-06	3.15222E-06	6.46336E-06	6.5889E-06	7.86713E-05	0.02782
ANAGLYCOLYSIS-PWY: glycolysis III (from glucose)|g__Bacteroides.s__Bacteroides_sp_2_1_22	0	0	0	0	0	0	0	0	2.84716E-07	8.0739E-07	0	0
ANAGLYCOLYSIS-PWY: glycolysis III (from glucose)|g__Bacteroides.s__Bacteroides_xylanisolvens	0	0	1.45156E-05	0	0	3.6556E-06	1.42908E-05	3.22216E-06	0	1.29551E-06	0	0
ANAGLYCOLYSIS-PWY: glycolysis III (from glucose)|g__Enterobacter.s__Enterobacter_cloacae	0	0	7.57305E-08	0	0	0	0	2.80638E-07	0	0	0	0
ANAGLYCOLYSIS-PWY: glycolysis III (from glucose)|g__Escherichia.s__Escherichia_coli	0	1.11838E-06	2.63159E-06	2.71794E-07	1.52244E-06	1.52672E-05	1.68331E-07	8.84396E-06	0	0	4.22097E-07	5.63748E-07
ANAGLYCOLYSIS-PWY: glycolysis III (from glucose)|g__Haemophilus.s__Haemophilus_parainfluenzae	0	0	0	0	0	4.65697E-07	0	0	0	9.91331E-07	0	0
ANAGLYCOLYSIS-PWY: glycolysis III (from glucose)|g__Klebsiella.s__Klebsiella_pneumoniae	0	0	0	0	0	1.18774E-07	0	1.43482E-06	0	0	0	0
ANAGLYCOLYSIS-PWY: glycolysis III (from glucose)|g__Lactococcus.s__Lactococcus_lactis	0	0	0	1.8432E-07	0	0	0	0	0	0	0	6.04073E-07
ANAGLYCOLYSIS-PWY: glycolysis III (from glucose)|g__Odoribacter.s__Odoribacter_splanchnicus	3.0873E-06	0	3.96265E-06	0	0	3.4911E-06	1.12331E-06	1.31691E-06	1.82337E-06	7.26795E-06	0	0
ANAGLYCOLYSIS-PWY: glycolysis III (from glucose)|g__Shigella.s__Shigella_flexneri	0	0	0	0	0	0	0	0	0	0	0	2.98509E-07
ANAGLYCOLYSIS-PWY: glycolysis III (from glucose)|g__Streptococcus.s__Streptococcus_australis	0	4.07439E-07	0	0	0	0	0	3.32566E-07	0	0	1.0795E-07	0
ANAGLYCOLYSIS-PWY: glycolysis III (from glucose)|g__Streptococcus.s__Streptococcus_infantis	0	1.3747E-06	0	0	0	1.62395E-07	0	6.60995E-07	0	0	0	5.15476E-07
ANAGLYCOLYSIS-PWY: glycolysis III (from glucose)|g__Streptococcus.s__Streptococcus_mitis_oralis_pneumoniae	0	1.9027E-06	4.88615E-07	1.65142E-07	0	5.66042E-07	0	8.82208E-07	0	0	0	0
ANAGLYCOLYSIS-PWY: glycolysis III (from glucose)|unclassified	1.38667E-05	1.54116E-05	4.41235E-05	2.57382E-05	5.59088E-05	3.65398E-05	8.16503E-05	7.3719E-05	5.00581E-05	5.11576E-05	1.08778E-05	4.05873E-05
ARG+POLYAMINE-SYN: superpathway of arginine and polyamine biosynthesis|g__Escherichia.s__Escherichia_coli	0	7.40547E-07	1.9643E-06	0	9.42379E-07	6.38905E-06	0	2.07953E-06	0	0	2.69293E-07	1.64537E-07
ARG+POLYAMINE-SYN: superpathway of arginine and polyamine biosynthesis|unclassified	1.42236E-05	0	6.94246E-06	9.32001E-06	0	1.67173E-05	0	1.22166E-05	0	6.24594E-06	2.40886E-06	9.39373E-07
ARGDEG-PWY: superpathway of L-arginine, putrescine, and 4-aminobutanoate degradation|g__Escherichia.s__Escherichia_coli	0	8.81221E-07	1.59407E-06	3.03427E-07	1.07242E-06	0	1.23675E-07	5.69696E-06	0	0	2.96557E-07	3.61768E-07
ARGININE-SYN4-PWY: L-ornithine de novo biosynthesis|g__Bacteroides.s__Bacteroides_caccae	2.97968E-06	0	0	0	0	0	1.44189E-06	3.18235E-06	3.01341E-06	8.94574E-06	0	0
ARGININE-SYN4-PWY: L-ornithine de novo biosynthesis|g__Bacteroides.s__Bacteroides_cellulosilyticus	0	0	0	7.19015E-06	0	0	0	0	0	0	2.30901E-06	2.00209E-05
ARGININE-SYN4-PWY: L-ornithine de novo biosynthesis|g__Bacteroides.s__Bacteroides_clarus	0	0	0	0	0	4.34946E-06	0	0	0	0	0	0
ARGININE-SYN4-PWY: L-ornithine de novo biosynthesis|g__Bacteroides.s__Bacteroides_faecis	0	0	1.85356E-05	0	0	0	0	0	4.05067E-06	1.02198E-05	0	0
ARGININE-SYN4-PWY: L-ornithine de novo biosynthesis|g__Bacteroides.s__Bacteroides_finegoldii	1.32216E-06	3.9075E-06	1.70038E-06	0	0	0	0	0	2.07349E-06	4.87956E-06	0	0
ARGININE-SYN4-PWY: L-ornithine de novo biosynthesis|g__Bacteroides.s__Bacteroides_fragilis	0	0	3.4116E-06	0	0	1.29501E-05	1.02414E-05	1.14365E-05	0	0	4.62957E-06	9.04439E-07
ARGININE-SYN4-PWY: L-ornithine de novo biosynthesis|g__Bacteroides.s__Bacteroides_intestinalis	0	0	1.28932E-06	0	0	0	0	0	0	0	0	0
ARGININE-SYN4-PWY: L-ornithine de novo biosynthesis|g__Bacteroides.s__Bacteroides_massiliensis	1.25677E-05	0.000107656	0	0	0	0	0	0	9.70719E-06	3.64208E-06	0	0
ARGININE-SYN4-PWY: L-ornithine de novo biosynthesis|g__Bacteroides.s__Bacteroides_nordii	2.58319E-06	0	0	0	0	0	2.1805E-06	1.44017E-06	5.05538E-07	9.3385E-07	0	0
ARGININE-SYN4-PWY: L-ornithine de novo biosynthesis|g__Bacteroides.s__Bacteroides_ovatus	3.80003E-06	4.29847E-05	1.97996E-05	2.06633E-06	0	8.40883E-08	4.06967E-06	4.67146E-06	6.04963E-06	6.79452E-06	7.52938E-05	2.25501E-05
ARGININE-SYN4-PWY: L-ornithine de novo biosynthesis|g__Bacteroides.s__Bacteroides_sp_2_1_22	0	0	0	0	0	0	0	0	1.0812E-07	6.1334E-07	0	0
ARGININE-SYN4-PWY: L-ornithine de novo biosynthesis|g__Bacteroides.s__Bacteroides_stercoris	1.58443E-06	1.72249E-05	5.36291E-05	0	0	5.64924E-08	8.51234E-08	2.43537E-07	0.000123118	1.54832E-05	0	0
ARGININE-SYN4-PWY: L-ornithine de novo biosynthesis|g__Bacteroides.s__Bacteroides_thetaiotaomicron	2.93799E-06	0	1.45013E-06	0	0	1.46419E-05	1.29604E-06	3.09679E-06	0	0	4.04461E-06	7.48054E-06
ARGININE-SYN4-PWY: L-ornithine de novo biosynthesis|g__Bacteroides.s__Bacteroides_uniformis	3.37686E-06	4.98897E-05	2.08735E-05	1.29055E-05	0	2.58224E-05	2.45685E-05	1.43995E-05	3.90963E-05	5.16538E-05	1.83271E-05	6.96727E-05
ARGININE-SYN4-PWY: L-ornithine de novo biosynthesis|g__Bacteroides.s__Bacteroides_xylanisolvens	0	0	1.52659E-05	7.22945E-07	0	5.15829E-06	1.44618E-05	2.02436E-06	0	5.70654E-07	0	0
ARGININE-SYN4-PWY: L-ornithine de novo biosynthesis|g__Lactococcus.s__Lactococcus_lactis	0	0	0	0	0	0	0	0	0	0	0	1.1804E-07
ARGININE-SYN4-PWY: L-ornithine de novo biosynthesis|unclassified	1.19514E-05	0	0	0	0	5.90418E-06	1.17891E-05	4.81585E-05	1.34477E-05	0	2.64435E-06	3.34546E-06
ARGSYN-PWY: L-arginine biosynthesis I (via L-ornithine)|g__Bifidobacterium.s__Bifidobacterium_longum	7.55616E-07	0	2.46976E-05	0	0	1.18158E-06	0	0	3.98807E-07	0	0	4.71316E-07
ARGSYN-PWY: L-arginine biosynthesis I (via L-ornithine)|g__Blautia.s__Ruminococcus_torques	3.58085E-05	2.55362E-05	5.46079E-06	1.15003E-05	2.36579E-05	1.56887E-05	6.53241E-06	1.30544E-05	1.42668E-06	2.15407E-06	7.70826E-07	0
ARGSYN-PWY: L-arginine biosynthesis I (via L-ornithine)|g__Burkholderiales_noname.s__Burkholderiales_bacterium_1_1_47	0	0	0	0	0	0	2.19411E-06	0	0	0	0	0
ARGSYN-PWY: L-arginine biosynthesis I (via L-ornithine)|g__Coprococcus.s__Coprococcus_catus	1.25318E-06	2.39765E-06	0	3.20477E-06	2.93863E-06	8.60911E-07	7.58237E-07	1.03408E-06	7.38687E-07	1.7082E-06	0	0
ARGSYN-PWY: L-arginine biosynthesis I (via L-ornithine)|g__Escherichia.s__Escherichia_coli	0	1.15714E-06	2.81107E-06	4.41678E-07	1.38672E-06	9.4399E-06	0	6.86022E-06	7.6264E-08	0	4.92326E-07	4.34102E-07
ARGSYN-PWY: L-arginine biosynthesis I (via L-ornithine)|g__Eubacterium.s__Eubacterium_siraeum	0	0	0	0	2.24255E-06	2.44523E-05	0	0	1.57853E-05	0	0	0
ARGSYN-PWY: L-arginine biosynthesis I (via L-ornithine)|g__Klebsiella.s__Klebsiella_pneumoniae	0	0	0	0	0	3.95096E-07	0	1.93894E-06	0	0	0	0
ARGSYN-PWY: L-arginine biosynthesis I (via L-ornithine)|g__Lactococcus.s__Lactococcus_lactis	0	0	0	6.44399E-07	2.5151E-07	0	0	0	0	0	0	8.62174E-07
ARGSYN-PWY: L-arginine biosynthesis I (via L-ornithine)|g__Morganella.s__Morganella_morganii	0	0	0	0	0	8.51847E-08	0	0	0	0	0	0
ARGSYN-PWY: L-arginine biosynthesis I (via L-ornithine)|g__Parasutterella.s__Parasutterella_excrementihominis	0	0	0	0	0	0	3.47223E-06	0	0	0	0	0
ARGSYN-PWY: L-arginine biosynthesis I (via L-ornithine)|g__Shigella.s__Shigella_flexneri	0	0	0	0	0	0	0	0	0	0	0	1.25109E-07
ARGSYN-PWY: L-arginine biosynthesis I (via L-ornithine)|g__Streptococcus.s__Streptococcus_mutans	0	0	0	0	0	3.37698E-07	0	2.5784E-07	0	0	0	0
ARGSYN-PWY: L-arginine biosynthesis I (via L-ornithine)|g__Veillonella.s__Veillonella_dispar	0	0	0	0	0	1.45108E-06	0	0	0	0	0	0
ARGSYN-PWY: L-arginine biosynthesis I (via L-ornithine)|g__Veillonella.s__Veillonella_parvula	0	0	0	0	0	2.74724E-06	0	0	0	5.85927E-07	0	0
ARGSYN-PWY: L-arginine biosynthesis I (via L-ornithine)|unclassified	3.07407E-05	4.47435E-05	1.99731E-05	0.000106663	6.01531E-05	8.40491E-05	9.46546E-06	7.10984E-05	4.83932E-05	7.40562E-05	5.9878E-05	2.18879E-05
ARGSYNBSUB-PWY: L-arginine biosynthesis II (acetyl cycle)|g__Bifidobacterium.s__Bifidobacterium_longum	8.16666E-07	2.06521E-07	2.47879E-05	0	0	1.17245E-06	0	1.48238E-07	4.28488E-07	1.21543E-07	0	3.68501E-07
ARGSYNBSUB-PWY: L-arginine biosynthesis II (acetyl cycle)|g__Blautia.s__Ruminococcus_torques	2.68701E-05	2.46506E-05	5.14852E-06	7.87063E-06	2.30595E-05	1.53159E-05	6.16457E-06	1.27686E-05	1.13901E-06	2.02058E-06	0	0
ARGSYNBSUB-PWY: L-arginine biosynthesis II (acetyl cycle)|g__Burkholderiales_noname.s__Burkholderiales_bacterium_1_1_47	0	0	0	0	0	0	2.19046E-06	0	0	0	0	0
ARGSYNBSUB-PWY: L-arginine biosynthesis II (acetyl cycle)|g__Coprococcus.s__Coprococcus_catus	1.14408E-06	2.6182E-06	0	3.23903E-06	3.04319E-06	7.3669E-07	7.30758E-07	8.76983E-07	0	1.69167E-06	0	0
ARGSYNBSUB-PWY: L-arginine biosynthesis II (acetyl cycle)|g__Escherichia.s__Escherichia_coli	0	1.02294E-06	2.7244E-06	1.07819E-07	1.00474E-06	8.90784E-06	0	4.25478E-06	0	0	4.46862E-07	3.42275E-07
ARGSYNBSUB-PWY: L-arginine biosynthesis II (acetyl cycle)|g__Eubacterium.s__Eubacterium_siraeum	0	0	0	0	2.51366E-06	2.50928E-05	0	0	1.66393E-05	0	0	0
ARGSYNBSUB-PWY: L-arginine biosynthesis II (acetyl cycle)|g__Lactococcus.s__Lactococcus_lactis	0	0	0	5.9461E-07	2.70041E-07	0	0	0	0	0	0	7.69127E-07
ARGSYNBSUB-PWY: L-arginine biosynthesis II (acetyl cycle)|g__Parasutterella.s__Parasutterella_excrementihominis	0	0	0	0	0	0	3.18777E-06	0	0	0	0	0
ARGSYNBSUB-PWY: L-arginine biosynthesis II (acetyl cycle)|g__Shigella.s__Shigella_flexneri	0	0	0	0	0	0	0	0	0	0	0	1.00676E-07
ARGSYNBSUB-PWY: L-arginine biosynthesis II (acetyl cycle)|g__Streptococcus.s__Streptococcus_mutans	0	0	0	0	0	3.13669E-07	0	3.3146E-07	0	0	0	0
ARGSYNBSUB-PWY: L-arginine biosynthesis II (acetyl cycle)|unclassified	1.2857E-05	0	0	3.71265E-06	4.00478E-06	0	3.5765E-06	1.2659E-05	0	3.1286E-06	7.28465E-07	2.70704E-07
ARO-PWY: chorismate biosynthesis I|g__Akkermansia.s__Akkermansia_muciniphila	8.22881E-06	2.00188E-06	0	0	0	0	4.66041E-07	6.50613E-05	1.2178E-06	4.42153E-06	0	1.38836E-06
ARO-PWY: chorismate biosynthesis I|g__Alistipes.s__Alistipes_finegoldii	4.14082E-06	0	0	4.95838E-06	0	0	1.27902E-06	2.31716E-06	0	3.24613E-06	0	0
ARO-PWY: chorismate biosynthesis I|g__Anaerostipes.s__Anaerostipes_hadrus	5.23439E-06	2.14209E-06	9.83476E-06	1.0299E-05	0	4.24548E-07	2.17212E-06	1.47127E-07	0	3.15218E-06	0	3.77374E-06
ARO-PWY: chorismate biosynthesis I|g__Blautia.s__Ruminococcus_gnavus	3.26521E-07	1.16385E-06	6.14137E-07	3.69139E-07	0	0	0	0	0	0	5.73932E-06	0
ARO-PWY: chorismate biosynthesis I|g__Blautia.s__Ruminococcus_obeum	6.23931E-07	0	7.4456E-07	1.40599E-05	1.58267E-06	8.55123E-07	6.7297E-06	9.41818E-06	1.01354E-06	1.15654E-06	1.75365E-05	1.45059E-05
ARO-PWY: chorismate biosynthesis I|g__Blautia.s__Ruminococcus_torques	3.63834E-05	2.84339E-05	5.91741E-06	1.42895E-05	2.67796E-05	1.65899E-05	5.59957E-06	1.1327E-05	1.40047E-06	2.03094E-06	6.82886E-06	0
ARO-PWY: chorismate biosynthesis I|g__Burkholderiales_noname.s__Burkholderiales_bacterium_1_1_47	0	0	0	0	0	0	1.36705E-06	0	0	1.75819E-07	0	0
ARO-PWY: chorismate biosynthesis I|g__Catenibacterium.s__Catenibacterium_mitsuokai	0	0	0	0	0	0	0	1.92511E-06	9.88814E-06	6.4135E-06	0	0
ARO-PWY: chorismate biosynthesis I|g__Clostridiales_noname.s__Clostridiales_bacterium_1_7_47FAA	0	0	0	0	0	0	0	0	0	0	1.97807E-07	0
ARO-PWY: chorismate biosynthesis I|g__Clostridium.s__Clostridium_asparagiforme	0	4.69152E-07	0	0	0	0	0	0	0	0	0	0
ARO-PWY: chorismate biosynthesis I|g__Clostridium.s__Clostridium_bolteae	0	0	0	1.37648E-07	0	0	0	0	0	0	5.38554E-07	0
ARO-PWY: chorismate biosynthesis I|g__Clostridium.s__Clostridium_clostridioforme	2.9849E-07	0	0	0	0	0	0	0	0	0	4.08794E-07	0
ARO-PWY: chorismate biosynthesis I|g__Clostridium.s__Clostridium_symbiosum	0	0	0	0	0	0	0	0	0	0	1.92333E-06	0
ARO-PWY: chorismate biosynthesis I|g__Dorea.s__Dorea_formicigenerans	5.10966E-06	2.39466E-06	1.68019E-06	5.90497E-06	2.03105E-06	2.02442E-06	1.4579E-06	1.13166E-06	3.64223E-07	4.10445E-07	1.82631E-06	4.36151E-07
ARO-PWY: chorismate biosynthesis I|g__Dorea.s__Dorea_longicatena	2.18873E-05	5.3029E-07	7.93422E-06	2.0427E-05	1.67989E-06	2.58078E-06	4.23202E-06	5.73148E-06	4.67372E-06	3.49249E-06	0	5.76291E-06
ARO-PWY: chorismate biosynthesis I|g__Erysipelotrichaceae_noname.s__Eubacterium_biforme	0	0	0	0	0	9.03582E-06	0	3.0665E-06	0	0	0	0
ARO-PWY: chorismate biosynthesis I|g__Escherichia.s__Escherichia_coli	0	9.06468E-07	2.65996E-06	4.59851E-07	1.38273E-06	1.58245E-05	2.37618E-07	7.50054E-06	0	1.4821E-07	4.57993E-07	4.62336E-07
ARO-PWY: chorismate biosynthesis I|g__Eubacterium.s__Eubacterium_eligens	0	0	1.00251E-05	0	0	1.66362E-05	1.3801E-05	2.19185E-06	7.1296E-07	3.22411E-06	0	7.4543E-06
ARO-PWY: chorismate biosynthesis I|g__Eubacterium.s__Eubacterium_rectale	1.19011E-05	0.000150635	0	0.000110217	0	8.26418E-06	4.20902E-05	2.59763E-06	2.19321E-05	3.38757E-06	0	3.13927E-06
ARO-PWY: chorismate biosynthesis I|g__Eubacterium.s__Eubacterium_siraeum	0	0	4.96789E-06	0	2.57794E-06	3.0068E-05	0	0	1.82338E-05	1.26384E-07	0	0
ARO-PWY: chorismate biosynthesis I|g__Eubacterium.s__Eubacterium_ventriosum	3.24478E-06	9.14654E-07	9.13351E-07	1.83841E-06	0	2.0928E-07	9.32692E-07	0	0	0	0	0
ARO-PWY: chorismate biosynthesis I|g__Haemophilus.s__Haemophilus_parainfluenzae	0	0	0	0	0	2.70101E-07	0	0	0	1.18129E-06	0	0
ARO-PWY: chorismate biosynthesis I|g__Klebsiella.s__Klebsiella_pneumoniae	0	0	0	0	0	3.32813E-07	0	1.97668E-06	0	0	0	0
ARO-PWY: chorismate biosynthesis I|g__Lachnospiraceae_noname.s__Lachnospiraceae_bacterium_1_1_57FAA	0	0	1.34057E-06	0	0	0	0	0	0	0	0	0
ARO-PWY: chorismate biosynthesis I|g__Lachnospiraceae_noname.s__Lachnospiraceae_bacterium_2_1_58FAA	0	1.06549E-06	9.60299E-07	5.20562E-07	0	0	0	0	0	0	6.23925E-06	0
ARO-PWY: chorismate biosynthesis I|g__Lachnospiraceae_noname.s__Lachnospiraceae_bacterium_3_1_46FAA	0	0	1.57044E-06	1.13744E-05	0	0	5.59517E-07	2.16747E-07	6.75256E-07	0	0	0
ARO-PWY: chorismate biosynthesis I|g__Lachnospiraceae_noname.s__Lachnospiraceae_bacterium_5_1_57FAA	0	0	0	0	0	0	0	0	0	0	0	4.05182E-07
ARO-PWY: chorismate biosynthesis I|g__Lachnospiraceae_noname.s__Lachnospiraceae_bacterium_5_1_63FAA	5.58233E-06	0	1.23562E-05	1.06917E-05	0	4.15013E-07	2.91441E-06	2.59535E-07	0	3.40909E-06	0	5.70716E-06
ARO-PWY: chorismate biosynthesis I|g__Lachnospiraceae_noname.s__Lachnospiraceae_bacterium_6_1_63FAA	0	0	0	5.45503E-07	0	0	0	0	0	0	0	0
ARO-PWY: chorismate biosynthesis I|g__Lactococcus.s__Lactococcus_lactis	0	0	0	0	0	0	0	0	0	0	0	5.94535E-07
ARO-PWY: chorismate biosynthesis I|g__Megamonas.s__Megamonas_rupellensis	2.94909E-05	0	0	0	0	0	0	0	0	0	0	0
ARO-PWY: chorismate biosynthesis I|g__Megasphaera.s__Megasphaera_elsdenii	0	0	0	0	0	4.18478E-06	0	0	0	0	0	0
ARO-PWY: chorismate biosynthesis I|g__Mitsuokella.s__Mitsuokella_multacida	0	0	0	0	0	9.85005E-07	0	0	0	0	0	0
ARO-PWY: chorismate biosynthesis I|g__Parasutterella.s__Parasutterella_excrementihominis	0	0	0	0	0	0	3.15625E-06	0	0	0	0	0
ARO-PWY: chorismate biosynthesis I|g__Peptostreptococcaceae_noname.s__Clostridium_bartlettii	0	0	2.81162E-07	0	0	0	0	0	0	0	0	1.87523E-07
ARO-PWY: chorismate biosynthesis I|g__Phascolarctobacterium.s__Phascolarctobacterium_succinatutens	1.53247E-05	0	0	0	0	0	0	7.93121E-06	0	0	0	0
ARO-PWY: chorismate biosynthesis I|g__Roseburia.s__Roseburia_hominis	2.1036E-06	3.77153E-07	2.55083E-06	5.35155E-07	0	1.23932E-06	1.38231E-06	0	0	0	0	0
ARO-PWY: chorismate biosynthesis I|g__Roseburia.s__Roseburia_intestinalis	1.00413E-05	4.86478E-06	0	2.16957E-05	8.27811E-05	1.00776E-06	3.20663E-05	1.50447E-06	6.52606E-06	0	0	0
ARO-PWY: chorismate biosynthesis I|g__Roseburia.s__Roseburia_inulinivorans	0	6.90979E-07	0	1.29737E-05	6.9454E-06	2.25132E-06	4.96662E-06	4.95762E-07	1.16801E-06	4.70571E-07	1.36057E-05	2.00269E-05
ARO-PWY: chorismate biosynthesis I|g__Ruminococcus.s__Ruminococcus_sp_5_1_39BFAA	1.57712E-05	0	2.13576E-05	2.6896E-05	2.40456E-05	9.82915E-06	1.92171E-05	7.67459E-06	7.3E-06	3.9582E-06	2.57397E-05	2.52694E-05
ARO-PWY: chorismate biosynthesis I|g__Shigella.s__Shigella_flexneri	0	0	0	0	0	0	0	0	0	0	0	2.11951E-07
ARO-PWY: chorismate biosynthesis I|g__Streptococcus.s__Streptococcus_gordonii	0	0	0	0	0	0	0	1.52901E-07	0	0	0	0
ARO-PWY: chorismate biosynthesis I|g__Streptococcus.s__Streptococcus_parasanguinis	0	0	0	0	0	2.92739E-06	0	2.04277E-06	0	0	0	1.82105E-06
ARO-PWY: chorismate biosynthesis I|g__Streptococcus.s__Streptococcus_salivarius	0.0001586	0	0	0	0	2.74923E-06	0	3.77797E-06	0	1.52912E-06	0	1.69459E-06
ARO-PWY: chorismate biosynthesis I|g__Streptococcus.s__Streptococcus_sanguinis	0	0	0	0	0	1.2702E-07	0	0	0	0	0	0
ARO-PWY: chorismate biosynthesis I|g__Streptococcus.s__Streptococcus_thermophilus	0.001581	0	3.97471E-07	2.89024E-06	3.03691E-06	4.75423E-07	5.53555E-07	0	0	0	2.54014E-06	2.19718E-06
ARO-PWY: chorismate biosynthesis I|g__Streptococcus.s__Streptococcus_vestibularis	0	0	0	0	0	1.72691E-06	0	2.59251E-06	0	9.94199E-07	0	0
ARO-PWY: chorismate biosynthesis I|unclassified	0.000105392	4.72362E-05	0.000100617	0.000156075	0.000239417	0.00012896	0.000325388	0.000155725	0.000125791	0.000146341	9.02137E-05	0.000124128
ASPASN-PWY: superpathway of L-aspartate and L-asparagine biosynthesis|g__Bacteroides.s__Bacteroides_faecis	0	0	1.55444E-05	0	0	0	0	0	3.0995E-06	9.78573E-06	0	0
ASPASN-PWY: superpathway of L-aspartate and L-asparagine biosynthesis|g__Bacteroides.s__Bacteroides_finegoldii	1.53271E-06	5.19647E-06	1.65424E-06	0	0	0	0	0	1.64887E-06	5.42883E-06	0	0
ASPASN-PWY: superpathway of L-aspartate and L-asparagine biosynthesis|g__Bacteroides.s__Bacteroides_ovatus	4.18088E-06	4.77758E-05	2.44441E-05	1.30269E-06	0	2.14365E-07	4.80847E-06	5.82586E-06	4.23973E-06	7.2436E-06	7.84869E-05	2.87131E-05
ASPASN-PWY: superpathway of L-aspartate and L-asparagine biosynthesis|g__Bacteroides.s__Bacteroides_sp_2_1_22	0	0	0	0	0	0	0	0	3.36413E-07	6.10894E-07	0	0
ASPASN-PWY: superpathway of L-aspartate and L-asparagine biosynthesis|g__Bacteroides.s__Bacteroides_thetaiotaomicron	3.1128E-06	0	2.00783E-06	0	0	1.48995E-05	1.62356E-06	2.12148E-06	0	0	5.19705E-06	7.63709E-06
ASPASN-PWY: superpathway of L-aspartate and L-asparagine biosynthesis|g__Bacteroides.s__Bacteroides_xylanisolvens	0	0	6.87135E-06	4.47038E-07	0	3.2224E-06	8.56761E-06	1.51952E-06	0	4.11568E-07	0	0
ASPASN-PWY: superpathway of L-aspartate and L-asparagine biosynthesis|g__Enterobacter.s__Enterobacter_cloacae	0	0	2.2075E-07	0	0	0	0	2.57789E-07	0	0	0	0
ASPASN-PWY: superpathway of L-aspartate and L-asparagine biosynthesis|g__Escherichia.s__Escherichia_coli	0	9.49324E-07	4.42858E-06	7.21595E-07	2.88255E-06	2.52409E-05	4.86352E-07	1.36295E-05	3.76627E-07	1.29089E-07	8.25311E-07	1.23964E-06
ASPASN-PWY: superpathway of L-aspartate and L-asparagine biosynthesis|g__Faecalibacterium.s__Faecalibacterium_prausnitzii	5.62519E-05	1.10134E-07	4.04872E-05	1.26204E-05	0.000124361	2.23511E-05	2.60068E-05	1.34408E-05	4.15089E-05	1.88343E-05	1.05111E-07	9.0742E-06
ASPASN-PWY: superpathway of L-aspartate and L-asparagine biosynthesis|g__Haemophilus.s__Haemophilus_parainfluenzae	0	0	8.58348E-08	0	0	7.30132E-07	0	0	0	9.42322E-07	0	7.34556E-08
ASPASN-PWY: superpathway of L-aspartate and L-asparagine biosynthesis|g__Lactobacillus.s__Lactobacillus_acidophilus	0	0	0	0	0	0	0	0	0	0	0	8.35661E-08
ASPASN-PWY: superpathway of L-aspartate and L-asparagine biosynthesis|g__Odoribacter.s__Odoribacter_splanchnicus	3.76785E-06	0	4.71162E-06	0	0	3.91632E-06	2.40487E-06	1.63989E-06	2.71172E-06	9.41507E-06	0	0
ASPASN-PWY: superpathway of L-aspartate and L-asparagine biosynthesis|g__Roseburia.s__Roseburia_intestinalis	6.70425E-06	1.83544E-06	0	1.10366E-05	6.36941E-05	4.59321E-07	1.9867E-05	8.11981E-07	4.88193E-06	9.53271E-08	0	0
ASPASN-PWY: superpathway of L-aspartate and L-asparagine biosynthesis|g__Shigella.s__Shigella_flexneri	0	0	0	0	0	0	0	0	0	0	0	5.14438E-07
ASPASN-PWY: superpathway of L-aspartate and L-asparagine biosynthesis|unclassified	1.61565E-05	5.14043E-06	1.2489E-05	2.99832E-05	2.13504E-05	1.9436E-05	2.12295E-05	2.57533E-05	1.29349E-05	1.15685E-05	2.15772E-05	7.55377E-06
AST-PWY: L-arginine degradation II (AST pathway)|g__Escherichia.s__Escherichia_coli	0	4.61206E-07	1.41029E-06	3.68866E-07	2.72535E-07	1.14362E-05	1.29932E-07	4.70719E-06	0	0	1.53656E-07	3.55521E-07
AST-PWY: L-arginine degradation II (AST pathway)|g__Shigella.s__Shigella_flexneri	0	0	0	0	0	0	0	0	0	0	0	1.18316E-07
BIOTIN-BIOSYNTHESIS-PWY: biotin biosynthesis I|g__Escherichia.s__Escherichia_coli	0	5.36797E-07	2.14749E-06	2.94526E-07	1.1286E-06	1.81687E-05	0	6.80985E-06	0	0	1.89074E-07	3.79622E-07
BIOTIN-BIOSYNTHESIS-PWY: biotin biosynthesis I|g__Haemophilus.s__Haemophilus_parainfluenzae	0	0	0	0	0	2.29718E-07	0	0	0	3.40728E-07	0	0
BIOTIN-BIOSYNTHESIS-PWY: biotin biosynthesis I|g__Klebsiella.s__Klebsiella_pneumoniae	0	0	0	0	0	1.1565E-07	0	1.82983E-06	0	0	0	0
BRANCHED-CHAIN-AA-SYN-PWY: superpathway of branched amino acid biosynthesis|g__Akkermansia.s__Akkermansia_muciniphila	8.67637E-06	2.14538E-06	0	5.6415E-07	0	3.09965E-07	1.24698E-06	6.87434E-05	8.18544E-07	5.30962E-06	0	2.82383E-06
BRANCHED-CHAIN-AA-SYN-PWY: superpathway of branched amino acid biosynthesis|g__Bifidobacterium.s__Bifidobacterium_longum	8.53158E-07	0	2.86466E-05	0	0	1.72567E-06	0	9.20218E-08	7.80749E-07	0	0	6.3655E-07
BRANCHED-CHAIN-AA-SYN-PWY: superpathway of branched amino acid biosynthesis|g__Blautia.s__Ruminococcus_obeum	8.28066E-07	4.10042E-07	1.12209E-06	1.20325E-05	2.44659E-06	9.77952E-07	8.05977E-06	9.46744E-06	1.15752E-06	5.76802E-07	1.56727E-05	1.31081E-05
BRANCHED-CHAIN-AA-SYN-PWY: superpathway of branched amino acid biosynthesis|g__Clostridium.s__Clostridium_leptum	1.38184E-06	0	2.04427E-06	0	0	0	0	1.53351E-07	0	0	0	0
BRANCHED-CHAIN-AA-SYN-PWY: superpathway of branched amino acid biosynthesis|g__Coprococcus.s__Coprococcus_catus	1.09107E-06	2.78865E-06	0	2.69988E-06	2.75894E-06	5.5618E-07	1.57463E-06	1.27468E-06	1.08012E-06	1.09909E-06	0	0
BRANCHED-CHAIN-AA-SYN-PWY: superpathway of branched amino acid biosynthesis|g__Coprococcus.s__Coprococcus_eutactus	0	0	0	0	9.42136E-06	0	0	3.44324E-06	0	0	0	0
BRANCHED-CHAIN-AA-SYN-PWY: superpathway of branched amino acid biosynthesis|g__Desulfovibrio.s__Desulfovibrio_piger	1.16893E-05	0	0	0	0	0	0	0	0	0	0	0
BRANCHED-CHAIN-AA-SYN-PWY: superpathway of branched amino acid biosynthesis|g__Enterobacter.s__Enterobacter_cloacae	0	0	0	0	0	8.84705E-08	0	1.77603E-07	0	0	0	0
BRANCHED-CHAIN-AA-SYN-PWY: superpathway of branched amino acid biosynthesis|g__Escherichia.s__Escherichia_coli	0	0	0	6.1835E-07	1.56255E-06	5.69495E-06	0	5.77096E-06	0	8.18705E-08	0	0
BRANCHED-CHAIN-AA-SYN-PWY: superpathway of branched amino acid biosynthesis|g__Eubacterium.s__Eubacterium_siraeum	0	0	5.39164E-06	0	3.18768E-06	3.01219E-05	0	0	1.79091E-05	3.62145E-07	0	7.51302E-07
BRANCHED-CHAIN-AA-SYN-PWY: superpathway of branched amino acid biosynthesis|g__Faecalibacterium.s__Faecalibacterium_prausnitzii	0.000102983	2.35128E-06	9.02591E-05	3.25158E-05	0.000290466	4.42367E-05	5.62087E-05	2.70666E-05	6.25367E-05	3.37035E-05	2.97045E-06	3.49469E-05
BRANCHED-CHAIN-AA-SYN-PWY: superpathway of branched amino acid biosynthesis|g__Fusobacterium.s__Fusobacterium_mortiferum	3.21426E-07	0	0	0	0	0	0	0	0	0	0	0
BRANCHED-CHAIN-AA-SYN-PWY: superpathway of branched amino acid biosynthesis|g__Lactococcus.s__Lactococcus_lactis	0	0	0	1.60036E-07	0	0	0	0	0	0	0	3.88424E-07
BRANCHED-CHAIN-AA-SYN-PWY: superpathway of branched amino acid biosynthesis|g__Megamonas.s__Megamonas_hypermegale	3.63204E-05	0	0	0	0	0	0	0	0	0	0	0
BRANCHED-CHAIN-AA-SYN-PWY: superpathway of branched amino acid biosynthesis|g__Megamonas.s__Megamonas_rupellensis	2.8961E-05	0	0	0	0	0	0	0	0	0	0	0
BRANCHED-CHAIN-AA-SYN-PWY: superpathway of branched amino acid biosynthesis|g__Methanobrevibacter.s__Methanobrevibacter_smithii	0	0	0	0	0	2.99802E-06	0	0	9.33092E-07	2.54203E-06	0	0
BRANCHED-CHAIN-AA-SYN-PWY: superpathway of branched amino acid biosynthesis|g__Mitsuokella.s__Mitsuokella_multacida	0	0	0	0	0	2.32764E-06	0	0	0	0	0	0
BRANCHED-CHAIN-AA-SYN-PWY: superpathway of branched amino acid biosynthesis|g__Odoribacter.s__Odoribacter_splanchnicus	3.15051E-06	0	3.75796E-06	0	0	3.89313E-06	1.28505E-06	1.35612E-06	2.28792E-06	6.09299E-06	0	0
BRANCHED-CHAIN-AA-SYN-PWY: superpathway of branched amino acid biosynthesis|g__Streptococcus.s__Streptococcus_australis	0	3.65794E-07	0	0	1.42689E-07	0	0	3.13527E-07	0	0	0	4.27179E-07
BRANCHED-CHAIN-AA-SYN-PWY: superpathway of branched amino acid biosynthesis|g__Streptococcus.s__Streptococcus_infantis	0	1.74401E-06	0	0	0	1.6145E-07	0	5.44656E-07	0	0	0	0
BRANCHED-CHAIN-AA-SYN-PWY: superpathway of branched amino acid biosynthesis|g__Streptococcus.s__Streptococcus_mitis_oralis_pneumoniae	0	3.26408E-06	6.57227E-07	2.15688E-07	0	7.50829E-07	0	6.28862E-07	0	0	0	0
BRANCHED-CHAIN-AA-SYN-PWY: superpathway of branched amino acid biosynthesis|g__Streptococcus.s__Streptococcus_parasanguinis	0	0	0	0	3.20035E-07	3.92798E-06	0	2.35727E-06	0	1.43469E-07	1.95971E-07	2.95427E-06
BRANCHED-CHAIN-AA-SYN-PWY: superpathway of branched amino acid biosynthesis|g__Streptococcus.s__Streptococcus_sanguinis	0	0	0	0	0	0	0	0	0	0	1.24801E-07	0
BRANCHED-CHAIN-AA-SYN-PWY: superpathway of branched amino acid biosynthesis|unclassified	8.78486E-05	2.89231E-05	9.80219E-05	0.000112971	0.000195157	0.000103971	0.000223778	0.000131236	6.34652E-05	0.000120441	7.47214E-05	8.12307E-05
CALVIN-PWY: Calvin-Benson-Bassham cycle|g__Anaerostipes.s__Anaerostipes_hadrus	5.57698E-06	3.55387E-06	1.43378E-05	2.05802E-05	0	7.32458E-08	3.89289E-06	1.76895E-07	0	1.45336E-06	0	4.06307E-06
CALVIN-PWY: Calvin-Benson-Bassham cycle|g__Blautia.s__Ruminococcus_torques	2.74295E-05	1.46845E-05	4.98607E-06	1.10871E-05	0	8.2529E-08	3.15209E-06	1.34286E-06	1.55374E-06	0	2.61881E-06	0
CALVIN-PWY: Calvin-Benson-Bassham cycle|g__Coprococcus.s__Coprococcus_catus	1.86466E-06	1.89786E-06	0	2.05587E-06	2.3623E-06	7.20166E-07	1.31055E-06	1.76679E-06	9.33533E-07	1.58868E-06	0	0
CALVIN-PWY: Calvin-Benson-Bassham cycle|g__Desulfovibrio.s__Desulfovibrio_piger	9.75612E-06	0	0	0	0	0	0	0	0	0	0	0
CALVIN-PWY: Calvin-Benson-Bassham cycle|g__Enterobacter.s__Enterobacter_cloacae	0	0	8.1927E-07	0	0	0	0	6.24287E-07	0	0	0	0
CALVIN-PWY: Calvin-Benson-Bassham cycle|g__Escherichia.s__Escherichia_coli	0	0	2.45251E-07	0	0	1.14553E-06	0	9.94059E-06	0	0	0	0
CALVIN-PWY: Calvin-Benson-Bassham cycle|g__Faecalibacterium.s__Faecalibacterium_prausnitzii	8.88866E-07	0	5.2847E-05	9.90167E-06	3.32296E-05	2.41791E-05	1.12905E-05	8.97796E-06	3.05589E-05	1.33109E-05	0	1.81163E-05
CALVIN-PWY: Calvin-Benson-Bassham cycle|g__Klebsiella.s__Klebsiella_pneumoniae	0	0	0	0	0	2.27549E-07	0	1.72278E-06	0	0	0	0
CALVIN-PWY: Calvin-Benson-Bassham cycle|g__Lachnospiraceae_noname.s__Lachnospiraceae_bacterium_5_1_63FAA	6.21642E-06	0	1.78868E-05	5.41723E-06	0	7.45415E-07	1.69272E-06	3.80674E-07	0	5.04409E-06	0	6.39948E-06
CALVIN-PWY: Calvin-Benson-Bassham cycle|g__Lactococcus.s__Lactococcus_lactis	0	0	0	0	0	0	0	0	0	0	0	6.28654E-07
CALVIN-PWY: Calvin-Benson-Bassham cycle|g__Megamonas.s__Megamonas_hypermegale	4.55414E-05	0	0	0	0	0	0	0	0	0	0	0
CALVIN-PWY: Calvin-Benson-Bassham cycle|g__Megamonas.s__Megamonas_rupellensis	2.11911E-05	0	0	0	0	0	0	0	0	0	0	0
CALVIN-PWY: Calvin-Benson-Bassham cycle|g__Odoribacter.s__Odoribacter_splanchnicus	3.42114E-06	0	3.96121E-06	0	0	3.40434E-06	1.26632E-06	1.1767E-06	2.0768E-06	7.82825E-06	0	0
CALVIN-PWY: Calvin-Benson-Bassham cycle|g__Peptostreptococcaceae_noname.s__Clostridium_bartlettii	0	0	2.82138E-07	0	0	0	0	0	0	0	0	0
CALVIN-PWY: Calvin-Benson-Bassham cycle|g__Ruminococcus.s__Ruminococcus_bromii	2.81838E-05	0.000121561	0	5.81333E-05	2.98496E-05	0	2.2998E-05	1.73368E-06	2.55723E-05	1.18897E-05	0	0
CALVIN-PWY: Calvin-Benson-Bassham cycle|unclassified	9.2775E-05	4.14485E-05	9.39282E-05	0.00014443	0.000214976	0.00012588	0.000265863	0.000157548	0.000120333	0.000144974	9.88563E-05	0.000115659
CENTFERM-PWY: pyruvate fermentation to butanoate|unclassified	1.57537E-05	9.56736E-06	0	8.83587E-06	2.36662E-05	1.50577E-05	3.8936E-05	9.46644E-06	7.31276E-06	2.56692E-06	3.13303E-06	0
CITRULBIO-PWY: L-citrulline biosynthesis|g__Lactococcus.s__Lactococcus_lactis	0	0	0	0	0	0	0	0	0	0	0	1.73499E-07
CITRULBIO-PWY: L-citrulline biosynthesis|unclassified	0	0	0	0	0	0	0	7.75643E-06	0	0	0	0
COA-PWY-1: coenzyme A biosynthesis II (mammalian)|g__Actinomyces.s__Actinomyces_graevenitzii	0	1.59645E-07	0	0	0	0	0	0	0	0	0	0
COA-PWY-1: coenzyme A biosynthesis II (mammalian)|g__Adlercreutzia.s__Adlercreutzia_equolifaciens	0	0	0	4.87517E-07	0	0	1.18373E-06	1.82735E-06	4.42249E-07	8.5523E-07	0	0
COA-PWY-1: coenzyme A biosynthesis II (mammalian)|g__Akkermansia.s__Akkermansia_muciniphila	9.51894E-06	2.62226E-06	0	6.30573E-07	0	0	8.06786E-07	6.60339E-05	1.01751E-06	5.90552E-06	0	2.58856E-06
COA-PWY-1: coenzyme A biosynthesis II (mammalian)|g__Alistipes.s__Alistipes_finegoldii	4.49914E-06	0	0	6.06356E-06	0	0	4.30454E-07	1.84409E-06	0	3.11295E-06	0	0
COA-PWY-1: coenzyme A biosynthesis II (mammalian)|g__Alistipes.s__Alistipes_indistinctus	2.35828E-06	0	0	0	0	0	0	3.16204E-06	0	3.07109E-07	0	0
COA-PWY-1: coenzyme A biosynthesis II (mammalian)|g__Alistipes.s__Alistipes_putredinis	2.80774E-05	0	0	4.10826E-05	3.30976E-05	1.11056E-06	2.07963E-05	1.08864E-05	5.73866E-06	1.88417E-05	6.34005E-06	1.12462E-05
COA-PWY-1: coenzyme A biosynthesis II (mammalian)|g__Anaerostipes.s__Anaerostipes_hadrus	4.74279E-06	1.38732E-06	9.0167E-06	7.16461E-06	0	5.89589E-07	1.71319E-06	0	0	2.1903E-06	0	3.29992E-06
COA-PWY-1: coenzyme A biosynthesis II (mammalian)|g__Anaerotruncus.s__Anaerotruncus_colihominis	2.4183E-07	0	3.65834E-07	0	0	1.21187E-07	4.59443E-07	0	0	0	0	0
COA-PWY-1: coenzyme A biosynthesis II (mammalian)|g__Atopobium.s__Atopobium_parvulum	0	0	0	0	0	0	0	1.13632E-07	0	0	0	0
COA-PWY-1: coenzyme A biosynthesis II (mammalian)|g__Bacteroides.s__Bacteroides_caccae	3.88739E-06	0	0	0	0	0	1.86856E-06	3.42645E-06	2.35467E-06	8.56291E-06	0	0
COA-PWY-1: coenzyme A biosynthesis II (mammalian)|g__Bacteroides.s__Bacteroides_cellulosilyticus	0	0	0	7.19803E-06	0	0	0	0	0	0	1.60169E-06	2.31218E-05
COA-PWY-1: coenzyme A biosynthesis II (mammalian)|g__Bacteroides.s__Bacteroides_coprophilus	0	0	0	0	0	0	0	0	1.42851E-05	1.58707E-05	0	0
COA-PWY-1: coenzyme A biosynthesis II (mammalian)|g__Bacteroides.s__Bacteroides_dorei	0	0	0	2.90922E-05	0	0	1.67545E-05	7.6087E-06	8.81447E-06	1.21051E-05	0	0
COA-PWY-1: coenzyme A biosynthesis II (mammalian)|g__Bacteroides.s__Bacteroides_eggerthii	1.19708E-06	0	0	0	0	0	0	0	2.33527E-05	1.04828E-05	0	0
COA-PWY-1: coenzyme A biosynthesis II (mammalian)|g__Bacteroides.s__Bacteroides_faecis	0	0	1.43355E-05	0	0	0	0	0	3.85667E-06	9.57771E-06	0	0
COA-PWY-1: coenzyme A biosynthesis II (mammalian)|g__Bacteroides.s__Bacteroides_finegoldii	1.89372E-06	6.28213E-06	2.1582E-06	0	0	0	0	0	1.5509E-06	6.60707E-06	0	0
COA-PWY-1: coenzyme A biosynthesis II (mammalian)|g__Bacteroides.s__Bacteroides_fragilis	0	0	3.57974E-06	0	0	1.55E-05	1.00382E-05	1.41021E-05	0	0	5.40638E-06	1.16264E-06
COA-PWY-1: coenzyme A biosynthesis II (mammalian)|g__Bacteroides.s__Bacteroides_intestinalis	0	0	1.43115E-06	0	0	0	0	0	0	0	0	0
COA-PWY-1: coenzyme A biosynthesis II (mammalian)|g__Bacteroides.s__Bacteroides_nordii	1.44222E-06	0	0	0	0	0	2.5234E-06	1.98345E-06	5.34712E-07	8.65663E-07	0	0
COA-PWY-1: coenzyme A biosynthesis II (mammalian)|g__Bacteroides.s__Bacteroides_ovatus	3.71294E-06	4.99923E-05	2.23105E-05	1.7273E-06	0	1.55485E-07	4.94126E-06	4.51426E-06	7.05092E-06	9.10121E-06	7.24077E-05	2.24267E-05
COA-PWY-1: coenzyme A biosynthesis II (mammalian)|g__Bacteroides.s__Bacteroides_sp_2_1_22	0	0	0	0	0	0	0	0	0	1.28053E-06	0	0
COA-PWY-1: coenzyme A biosynthesis II (mammalian)|g__Bacteroides.s__Bacteroides_thetaiotaomicron	2.86407E-06	0	1.24018E-06	0	0	1.3459E-05	1.37294E-06	2.07238E-06	0	0	5.44184E-06	7.61468E-06
COA-PWY-1: coenzyme A biosynthesis II (mammalian)|g__Bacteroides.s__Bacteroides_uniformis	2.94925E-06	5.25723E-05	1.70287E-05	1.46298E-05	0	2.60231E-05	2.15508E-05	1.4368E-05	4.08449E-05	5.13138E-05	1.78884E-05	6.88508E-05
COA-PWY-1: coenzyme A biosynthesis II (mammalian)|g__Bacteroides.s__Bacteroides_vulgatus	2.58884E-05	0.000106798	3.95743E-05	0	0	2.96033E-05	7.95759E-07	1.20542E-07	3.55093E-05	4.61671E-05	0.000122827	9.55996E-05
COA-PWY-1: coenzyme A biosynthesis II (mammalian)|g__Bacteroides.s__Bacteroides_xylanisolvens	0	0	1.34376E-05	7.96302E-07	0	4.90032E-06	1.10111E-05	2.15769E-06	0	1.30755E-06	0	0
COA-PWY-1: coenzyme A biosynthesis II (mammalian)|g__Barnesiella.s__Barnesiella_intestinihominis	2.53235E-06	0	1.54719E-05	3.48131E-06	0	0	3.06478E-06	3.87792E-06	0	0	0	0
COA-PWY-1: coenzyme A biosynthesis II (mammalian)|g__Bifidobacterium.s__Bifidobacterium_adolescentis	0	0	0	0	0	1.28054E-07	0	0	6.79567E-06	1.21285E-06	0	0
COA-PWY-1: coenzyme A biosynthesis II (mammalian)|g__Bifidobacterium.s__Bifidobacterium_bifidum	0	0	0	0	0	2.12114E-06	0	0	0	0	0	1.70055E-06
COA-PWY-1: coenzyme A biosynthesis II (mammalian)|g__Bifidobacterium.s__Bifidobacterium_catenulatum	0	0	0	0	0	9.91587E-07	0	0	0	1.06741E-05	0	9.56638E-07
COA-PWY-1: coenzyme A biosynthesis II (mammalian)|g__Bifidobacterium.s__Bifidobacterium_dentium	0	0	0	0	0	0.0001346	0	0	0	3.67288E-07	0	0
COA-PWY-1: coenzyme A biosynthesis II (mammalian)|g__Bifidobacterium.s__Bifidobacterium_longum	1.41E-06	0	2.85261E-05	0	0	1.95757E-06	0	3.93943E-07	0	0	0	0
COA-PWY-1: coenzyme A biosynthesis II (mammalian)|g__Bifidobacterium.s__Bifidobacterium_pseudocatenulatum	0	0	1.71241E-05	0	0	0	2.44885E-07	0	0	0	0	0
COA-PWY-1: coenzyme A biosynthesis II (mammalian)|g__Blautia.s__Blautia_hydrogenotrophica	0	0	1.4235E-07	0	0	0	0	0	0	0	0	0
COA-PWY-1: coenzyme A biosynthesis II (mammalian)|g__Blautia.s__Ruminococcus_gnavus	4.17387E-07	8.63395E-07	6.04968E-07	0	0	0	0	0	0	0	1.22104E-05	3.43668E-07
COA-PWY-1: coenzyme A biosynthesis II (mammalian)|g__Blautia.s__Ruminococcus_obeum	9.66381E-08	0	0	1.11135E-05	0	3.03647E-07	5.51491E-06	7.11196E-06	3.45122E-07	6.34051E-07	1.4752E-05	1.33142E-05
COA-PWY-1: coenzyme A biosynthesis II (mammalian)|g__Blautia.s__Ruminococcus_torques	3.74018E-05	2.05136E-05	4.60974E-06	1.64942E-05	1.80095E-05	1.75621E-05	6.58166E-06	1.38934E-05	5.83256E-07	1.54989E-06	0.005992	0
COA-PWY-1: coenzyme A biosynthesis II (mammalian)|g__Catenibacterium.s__Catenibacterium_mitsuokai	0	0	0	0	0	0	0	1.91421E-06	4.7463E-06	4.72243E-06	0	0
COA-PWY-1: coenzyme A biosynthesis II (mammalian)|g__Clostridium.s__Clostridium_bolteae	0	0	0	0	0	0	0	0	0	0	8.16115E-07	1.76501E-07
COA-PWY-1: coenzyme A biosynthesis II (mammalian)|g__Clostridium.s__Clostridium_clostridioforme	0	0	0	0	0	0	0	0	0	0	1.17204E-07	0
COA-PWY-1: coenzyme A biosynthesis II (mammalian)|g__Clostridium.s__Clostridium_leptum	7.59765E-07	0	1.49879E-06	0	0	0	0	0	0	0	0	0
COA-PWY-1: coenzyme A biosynthesis II (mammalian)|g__Clostridium.s__Clostridium_nexile	0	0	0	0	0	1.86784E-06	0	0	0	0	7.67455E-06	0
COA-PWY-1: coenzyme A biosynthesis II (mammalian)|g__Clostridium.s__Clostridium_perfringens	0	0	0	0	0	2.00206E-07	0	3.03792E-07	0	0	0	0
COA-PWY-1: coenzyme A biosynthesis II (mammalian)|g__Collinsella.s__Collinsella_aerofaciens	4.58822E-06	0	0	0	0	2.95258E-06	1.94601E-06	1.93162E-06	7.72746E-07	4.52678E-06	0	1.01177E-06
COA-PWY-1: coenzyme A biosynthesis II (mammalian)|g__Coprobacter.s__Coprobacter_fastidiosus	2.35834E-06	5.93994E-06	0	0	0	2.34041E-06	2.88709E-07	0	0	1.65391E-06	0	0
COA-PWY-1: coenzyme A biosynthesis II (mammalian)|g__Coprococcus.s__Coprococcus_catus	5.89873E-07	2.87924E-06	0	2.43536E-06	8.12628E-07	0	6.37825E-07	1.40403E-06	3.05087E-07	2.9942E-07	0	0
COA-PWY-1: coenzyme A biosynthesis II (mammalian)|g__Coprococcus.s__Coprococcus_comes	2.30737E-06	3.16063E-07	0	6.8197E-06	7.2749E-06	2.6134E-06	1.43106E-06	1.35295E-06	2.90476E-06	5.90383E-07	4.33405E-06	9.48574E-07
COA-PWY-1: coenzyme A biosynthesis II (mammalian)|g__Coprococcus.s__Coprococcus_eutactus	0	0	0	0	5.36108E-06	0	0	2.60837E-06	0	0	0	0
COA-PWY-1: coenzyme A biosynthesis II (mammalian)|g__Desulfovibrio.s__Desulfovibrio_piger	9.1406E-06	0	0	0	0	0	0	0	0	0	0	0
COA-PWY-1: coenzyme A biosynthesis II (mammalian)|g__Dialister.s__Dialister_invisus	0	0	8.27806E-07	0	0	0.001052	0	0	0	0	5.07682E-05	1.16196E-05
COA-PWY-1: coenzyme A biosynthesis II (mammalian)|g__Dorea.s__Dorea_formicigenerans	4.42951E-06	2.62435E-06	1.10828E-06	6.14327E-06	1.46054E-06	2.39373E-06	1.20427E-06	5.28788E-07	0	6.51527E-07	7.20455E-07	3.25306E-07
COA-PWY-1: coenzyme A biosynthesis II (mammalian)|g__Dorea.s__Dorea_longicatena	1.96621E-05	5.30674E-07	6.80308E-06	1.59133E-05	1.67676E-06	2.46202E-06	3.60577E-06	5.89386E-06	0.003459	2.49109E-06	0	4.61723E-06
COA-PWY-1: coenzyme A biosynthesis II (mammalian)|g__Eggerthella.s__Eggerthella_lenta	4.66821E-07	0	0	0	0	0	0	0	0	0	0	0
COA-PWY-1: coenzyme A biosynthesis II (mammalian)|g__Enterococcus.s__Enterococcus_faecalis	0	0	0	1.39223E-06	0	4.7658E-07	0	2.06526E-07	0	0	0	0
COA-PWY-1: coenzyme A biosynthesis II (mammalian)|g__Erysipelotrichaceae_noname.s__Clostridium_innocuum	0	0	0	0	0	0	0	0	0	0	8.82044E-08	0
COA-PWY-1: coenzyme A biosynthesis II (mammalian)|g__Erysipelotrichaceae_noname.s__Clostridium_spiroforme	0	0	0	0	2.16962E-06	0	0	0	0	0	0	0
COA-PWY-1: coenzyme A biosynthesis II (mammalian)|g__Erysipelotrichaceae_noname.s__Eubacterium_biforme	0	0	0	0	0	5.83886E-06	0	3.44124E-07	2.5328E-06	3.47363E-07	0	0
COA-PWY-1: coenzyme A biosynthesis II (mammalian)|g__Erysipelotrichaceae_noname.s__Eubacterium_dolichum	0	0	0	3.05003E-07	0	0	0	0	0	0	0	0
COA-PWY-1: coenzyme A biosynthesis II (mammalian)|g__Escherichia.s__Escherichia_coli	0	7.0984E-07	2.61025E-06	8.23562E-07	1.43715E-06	1.49245E-05	3.28118E-07	8.88972E-06	0	0	5.2692E-07	0
COA-PWY-1: coenzyme A biosynthesis II (mammalian)|g__Eubacterium.s__Eubacterium_eligens	0	0	3.47457E-06	0	0	3.06402E-06	1.9792E-06	0	0	6.87779E-07	0	1.04972E-06
COA-PWY-1: coenzyme A biosynthesis II (mammalian)|g__Eubacterium.s__Eubacterium_hallii	9.29673E-06	0	1.67096E-05	1.20312E-05	7.19333E-06	2.88161E-06	2.8502E-06	0.003911	7.03734E-07	9.14301E-07	2.84425E-05	1.21725E-05
COA-PWY-1: coenzyme A biosynthesis II (mammalian)|g__Eubacterium.s__Eubacterium_rectale	9.68791E-06	0.000116123	0	7.97704E-05	0	7.4485E-06	3.87141E-05	1.92118E-06	1.9371E-05	2.81851E-06	0	1.81292E-06
COA-PWY-1: coenzyme A biosynthesis II (mammalian)|g__Eubacterium.s__Eubacterium_siraeum	0	0	3.64776E-06	0	2.13554E-06	2.66583E-05	0	0	1.58962E-05	0	0	0
COA-PWY-1: coenzyme A biosynthesis II (mammalian)|g__Eubacterium.s__Eubacterium_sp_3_1_31	0	0	1.40014E-06	2.36611E-06	0	0	0	0	0	0	0	0
COA-PWY-1: coenzyme A biosynthesis II (mammalian)|g__Eubacterium.s__Eubacterium_ventriosum	4.74533E-06	0.001476	1.01675E-06	2.8208E-06	0	2.3432E-07	1.29264E-06	0	0	0	0	0
COA-PWY-1: coenzyme A biosynthesis II (mammalian)|g__Faecalibacterium.s__Faecalibacterium_prausnitzii	5.85024E-05	0	5.83789E-05	1.72324E-05	0.000199822	1.90114E-05	2.86992E-05	1.92463E-05	4.41344E-05	1.52286E-05	0	2.15116E-05
COA-PWY-1: coenzyme A biosynthesis II (mammalian)|g__Flavonifractor.s__Flavonifractor_plautii	0	9.57801E-07	4.20904E-07	0	0	0	0	0	0	0	3.88427E-07	0
COA-PWY-1: coenzyme A biosynthesis II (mammalian)|g__Gordonibacter.s__Gordonibacter_pamelaeae	2.71465E-07	0	0	0	0	0	0	0	0	0	0	0
COA-PWY-1: coenzyme A biosynthesis II (mammalian)|g__Haemophilus.s__Haemophilus_parainfluenzae	0	0	0	0	0	1.06339E-06	0	0	0	1.00773E-06	0	0
COA-PWY-1: coenzyme A biosynthesis II (mammalian)|g__Holdemania.s__Holdemania_filiformis	6.9205E-08	0	0	0	0	0	0	0	0	0	0	0
COA-PWY-1: coenzyme A biosynthesis II (mammalian)|g__Klebsiella.s__Klebsiella_pneumoniae	0	0	0	0	0	0	0	1.57072E-06	0	0	0	0
COA-PWY-1: coenzyme A biosynthesis II (mammalian)|g__Lachnospiraceae_noname.s__Lachnospiraceae_bacterium_1_1_57FAA	0	0	1.03022E-06	0	0	0	0	0	0	0	0	0
COA-PWY-1: coenzyme A biosynthesis II (mammalian)|g__Lachnospiraceae_noname.s__Lachnospiraceae_bacterium_1_4_56FAA	2.93024E-07	0	0	7.18089E-07	0	0	0	0	0	0	1.25892E-06	3.22384E-07
COA-PWY-1: coenzyme A biosynthesis II (mammalian)|g__Lachnospiraceae_noname.s__Lachnospiraceae_bacterium_2_1_58FAA	1.08955E-07	5.56853E-07	8.46927E-07	2.44904E-07	0	0	0	0	0	0	1.25911E-05	0
COA-PWY-1: coenzyme A biosynthesis II (mammalian)|g__Lachnospiraceae_noname.s__Lachnospiraceae_bacterium_3_1_46FAA	0	0	4.44541E-07	1.39863E-05	0	0	9.01933E-07	1.61277E-07	5.25655E-07	0	0	0
COA-PWY-1: coenzyme A biosynthesis II (mammalian)|g__Lachnospiraceae_noname.s__Lachnospiraceae_bacterium_5_1_57FAA	0	0	2.43616E-07	0	0	0	0	0	0	0	0	0
COA-PWY-1: coenzyme A biosynthesis II (mammalian)|g__Lachnospiraceae_noname.s__Lachnospiraceae_bacterium_5_1_63FAA	6.82002E-06	0	0.008075	9.93592E-06	0	5.35095E-07	1.99746E-06	4.02011E-07	0	2.62657E-06	0	3.58205E-06
COA-PWY-1: coenzyme A biosynthesis II (mammalian)|g__Lachnospiraceae_noname.s__Lachnospiraceae_bacterium_6_1_63FAA	0	0	0	1.80233E-07	0	0	0	0	0	0	0	0
COA-PWY-1: coenzyme A biosynthesis II (mammalian)|g__Lachnospiraceae_noname.s__Lachnospiraceae_bacterium_7_1_58FAA	0	1.19326E-06	7.34946E-07	2.05914E-07	6.65223E-07	0	2.77065E-07	0	3.56431E-07	0	4.83806E-07	0
COA-PWY-1: coenzyme A biosynthesis II (mammalian)|g__Lachnospiraceae_noname.s__Lachnospiraceae_bacterium_9_1_43BFAA	0	2.59764E-07	0	0	0	0	0	0	0	0	4.03821E-07	0
COA-PWY-1: coenzyme A biosynthesis II (mammalian)|g__Lactococcus.s__Lactococcus_lactis	0	0	0	8.19862E-07	0	0	0	0	2.31557E-07	0	0	1.03452E-06
COA-PWY-1: coenzyme A biosynthesis II (mammalian)|g__Megasphaera.s__Megasphaera_elsdenii	0	0	0	0	0	4.43694E-06	0	0	0	0	0	0
COA-PWY-1: coenzyme A biosynthesis II (mammalian)|g__Odoribacter.s__Odoribacter_splanchnicus	3.86739E-06	0	4.98987E-06	0	0	2.82315E-06	1.30755E-06	9.89103E-07	2.20637E-06	7.43727E-06	0	0
COA-PWY-1: coenzyme A biosynthesis II (mammalian)|g__Parabacteroides.s__Parabacteroides_distasonis	4.1062E-06	0	2.26058E-05	3.05246E-06	0	2.08247E-06	3.98285E-06	1.18765E-05	2.27092E-06	5.0952E-06	0	2.01409E-06
COA-PWY-1: coenzyme A biosynthesis II (mammalian)|g__Parabacteroides.s__Parabacteroides_johnsonii	0	0	0	0	0	6.25254E-07	4.61466E-07	7.60858E-07	0	0	0	0
COA-PWY-1: coenzyme A biosynthesis II (mammalian)|g__Parabacteroides.s__Parabacteroides_merdae	7.81046E-06	1.77925E-05	1.96309E-06	0	0	1.6959E-06	2.75802E-06	4.01335E-06	2.81589E-06	6.20579E-06	1.18574E-05	1.04927E-05
COA-PWY-1: coenzyme A biosynthesis II (mammalian)|g__Parabacteroides.s__Parabacteroides_sp_D13	0	0	0	0	0	2.7281E-06	0	0	0	0	0	0
COA-PWY-1: coenzyme A biosynthesis II (mammalian)|g__Parasutterella.s__Parasutterella_excrementihominis	0	0	0	0	0	0	1.42062E-06	0	0	0	0	0
COA-PWY-1: coenzyme A biosynthesis II (mammalian)|g__Phascolarctobacterium.s__Phascolarctobacterium_succinatutens	1.35622E-05	0	0	0	0	0	0	6.96461E-06	0	0	0	0
COA-PWY-1: coenzyme A biosynthesis II (mammalian)|g__Roseburia.s__Roseburia_hominis	2.72839E-06	0	4.15244E-06	3.33884E-07	0	5.96424E-07	8.53242E-07	8.25885E-07	0	6.38226E-07	0	0
COA-PWY-1: coenzyme A biosynthesis II (mammalian)|g__Roseburia.s__Roseburia_intestinalis	4.95354E-06	2.38275E-06	0	1.28952E-05	6.53776E-05	8.35334E-07	2.19427E-05	1.36409E-06	5.7377E-06	0	0	0
COA-PWY-1: coenzyme A biosynthesis II (mammalian)|g__Roseburia.s__Roseburia_inulinivorans	6.63413E-07	7.59873E-07	0	8.43451E-06	8.02646E-06	1.81633E-06	2.05584E-06	8.53503E-07	1.62651E-06	8.90496E-07	1.05198E-05	1.63309E-05
COA-PWY-1: coenzyme A biosynthesis II (mammalian)|g__Ruminococcus.s__Ruminococcus_callidus	0	0	0	0	0	0	1.11711E-05	0	1.00759E-06	0	0	0
COA-PWY-1: coenzyme A biosynthesis II (mammalian)|g__Ruminococcus.s__Ruminococcus_lactaris	0	0	0	0	0	0	0	1.16761E-06	0	1.57795E-06	0	0
COA-PWY-1: coenzyme A biosynthesis II (mammalian)|g__Ruminococcus.s__Ruminococcus_sp_5_1_39BFAA	1.39551E-05	0	1.71446E-05	2.08422E-05	1.85331E-05	8.29589E-06	1.70204E-05	5.73634E-06	6.15631E-06	1.99409E-06	1.90356E-05	1.82171E-05
COA-PWY-1: coenzyme A biosynthesis II (mammalian)|g__Shigella.s__Shigella_flexneri	0	0	0	0	0	0	0	0	0	0	0	3.12508E-07
COA-PWY-1: coenzyme A biosynthesis II (mammalian)|g__Streptococcus.s__Streptococcus_australis	0	5.23567E-07	0	0	0	0	0	2.34075E-07	0	0	0	2.43427E-07
COA-PWY-1: coenzyme A biosynthesis II (mammalian)|g__Streptococcus.s__Streptococcus_gordonii	0	0	0	0	0	0	0	2.21002E-07	0	0	0	0
COA-PWY-1: coenzyme A biosynthesis II (mammalian)|g__Streptococcus.s__Streptococcus_infantis	0	2.5701E-06	2.60314E-07	0	0	0	0	1.63442E-07	0	0	0	2.86305E-07
COA-PWY-1: coenzyme A biosynthesis II (mammalian)|g__Streptococcus.s__Streptococcus_lutetiensis	0	0	0	0	0	0	0	7.6111E-06	0	0	0	0
COA-PWY-1: coenzyme A biosynthesis II (mammalian)|g__Streptococcus.s__Streptococcus_mitis_oralis_pneumoniae	0	3.34794E-06	7.56487E-07	0	0	3.87411E-07	0	3.06303E-07	0	0	0	0
COA-PWY-1: coenzyme A biosynthesis II (mammalian)|g__Streptococcus.s__Streptococcus_mutans	0	0	0	0	0	3.01496E-07	0	3.8845E-07	0	0	0	0
COA-PWY-1: coenzyme A biosynthesis II (mammalian)|g__Streptococcus.s__Streptococcus_parasanguinis	0	0	0	0	6.33882E-07	4.29349E-06	0	2.35153E-06	0	0	2.37738E-07	1.77673E-06
COA-PWY-1: coenzyme A biosynthesis II (mammalian)|g__Streptococcus.s__Streptococcus_sanguinis	0	0	0	0	0	0	0	0	0	0	1.94743E-07	0
COA-PWY-1: coenzyme A biosynthesis II (mammalian)|g__Sutterella.s__Sutterella_wadsworthensis	4.66227E-06	0	0	0	0	4.98088E-06	0	8.52848E-06	0	0	0	0
COA-PWY-1: coenzyme A biosynthesis II (mammalian)|g__Veillonella.s__Veillonella_atypica	0	0	0	0	0	1.33116E-06	0	1.50141E-07	0	1.98963E-07	0	0
COA-PWY-1: coenzyme A biosynthesis II (mammalian)|g__Veillonella.s__Veillonella_dispar	0	0	0	0	0	1.1699E-06	0	0	0	0	0	0
COA-PWY-1: coenzyme A biosynthesis II (mammalian)|g__Veillonella.s__Veillonella_parvula	0	0	0	0	0	2.93374E-06	0	0	0	6.01818E-07	0	2.41215E-07
COA-PWY-1: coenzyme A biosynthesis II (mammalian)|unclassified	0.000103386	7.58014E-05	8.39246E-05	0.0001469	0.000192097	0.000114017	0.000375769	0.000173491	0.000149614	0.000178578	5.56323E-05	0.000137247
COA-PWY: coenzyme A biosynthesis I|g__Akkermansia.s__Akkermansia_muciniphila	8.4161E-06	2.5555E-06	0	6.68295E-07	0	1.11766E-07	1.40652E-06	7.17181E-05	1.01751E-06	5.90552E-06	0	2.73099E-06
COA-PWY: coenzyme A biosynthesis I|g__Anaerofustis.s__Anaerofustis_stercorihominis	0	0	1.68323E-07	0	0	0	0	0	0	0	0	0
COA-PWY: coenzyme A biosynthesis I|g__Anaerostipes.s__Anaerostipes_hadrus	4.19767E-06	1.14749E-06	8.65959E-06	6.99625E-06	0	3.91448E-07	1.64176E-06	0	0	2.30352E-06	0	3.25057E-06
COA-PWY: coenzyme A biosynthesis I|g__Anaerotruncus.s__Anaerotruncus_colihominis	3.74014E-07	0	2.74838E-07	0	0	0	1.24233E-07	0	0	0	0	0
COA-PWY: coenzyme A biosynthesis I|g__Atopobium.s__Atopobium_parvulum	0	0	0	0	0	0	0	1.13632E-07	0	0	0	0
COA-PWY: coenzyme A biosynthesis I|g__Bacteroides.s__Bacteroides_ovatus	3.71294E-06	4.99923E-05	2.23105E-05	1.7273E-06	0	8.10778E-08	4.39922E-06	5.49335E-06	6.35501E-06	9.10121E-06	7.24077E-05	2.32167E-05
COA-PWY: coenzyme A biosynthesis I|g__Bacteroides.s__Bacteroides_sp_2_1_22	0	0	0	0	0	0	0	0	0	1.11212E-06	0	0
COA-PWY: coenzyme A biosynthesis I|g__Bacteroides.s__Bacteroides_xylanisolvens	0	0	1.25955E-05	6.7372E-07	0	5.2022E-06	1.1536E-05	2.2579E-06	0	1.13086E-06	0	0
COA-PWY: coenzyme A biosynthesis I|g__Bifidobacterium.s__Bifidobacterium_dentium	0	0	0	0	0	0	0	0	0	3.67288E-07	0	0
COA-PWY: coenzyme A biosynthesis I|g__Blautia.s__Ruminococcus_torques	2.74857E-05	1.91252E-05	4.1939E-06	4.98963E-06	1.86636E-05	1.78754E-05	6.16058E-06	1.42777E-05	5.02881E-07	1.59657E-06	0	0
COA-PWY: coenzyme A biosynthesis I|g__Clostridiales_noname.s__Clostridiales_bacterium_1_7_47FAA	0	0	0	0	0	0	0	0	0	0	1.79615E-07	0
COA-PWY: coenzyme A biosynthesis I|g__Coprococcus.s__Coprococcus_eutactus	0	0	0	0	0.005101	0	0	3.1411E-06	0	0	0	0
COA-PWY: coenzyme A biosynthesis I|g__Desulfovibrio.s__Desulfovibrio_piger	8.1047E-06	0	0	0	0	0	0	0	0	0	0	0
COA-PWY: coenzyme A biosynthesis I|g__Eggerthella.s__Eggerthella_lenta	4.03283E-07	0	0	0	0	0	0	0	0	0	0	0
COA-PWY: coenzyme A biosynthesis I|g__Erysipelotrichaceae_noname.s__Clostridium_spiroforme	0	0	0	0	2.50958E-06	0	0	0	0	0	0	0
COA-PWY: coenzyme A biosynthesis I|g__Escherichia.s__Escherichia_coli	0	6.52042E-07	2.5546E-06	7.13746E-07	1.43563E-06	8.23796E-06	2.3368E-07	8.1929E-06	0	0	9.30194E-07	0
COA-PWY: coenzyme A biosynthesis I|g__Eubacterium.s__Eubacterium_ventriosum	4.82852E-06	1.31849E-06	1.12118E-06	2.76207E-06	0	1.77434E-07	1.25193E-06	0	0	0	0	0
COA-PWY: coenzyme A biosynthesis I|g__Faecalibacterium.s__Faecalibacterium_prausnitzii	3.01261E-05	0	3.58841E-05	1.53297E-05	0.00014395	1.66273E-05	2.02802E-05	1.1726E-05	2.60607E-05	1.27555E-05	0	8.1891E-06
COA-PWY: coenzyme A biosynthesis I|g__Lachnospiraceae_noname.s__Lachnospiraceae_bacterium_5_1_63FAA	7.82671E-06	0	8.96981E-06	1.31015E-05	0	7.23972E-07	2.18607E-06	3.95138E-07	0	4.59048E-06	0	4.19165E-06
COA-PWY: coenzyme A biosynthesis I|g__Lactococcus.s__Lactococcus_lactis	0	0	0	9.99825E-07	0	0	2.10953E-07	0	2.31557E-07	0	0	1.03452E-06
COA-PWY: coenzyme A biosynthesis I|g__Odoribacter.s__Odoribacter_splanchnicus	3.32879E-06	0	4.58879E-06	0	0	2.93796E-06	1.92455E-06	1.13147E-06	2.38523E-06	6.74132E-06	0	0
COA-PWY: coenzyme A biosynthesis I|g__Phascolarctobacterium.s__Phascolarctobacterium_succinatutens	1.29994E-05	0	0	0	0	0	0	6.67946E-06	0	0	0	0
COA-PWY: coenzyme A biosynthesis I|g__Roseburia.s__Roseburia_intestinalis	4.89222E-06	2.23629E-06	0	1.29018E-05	6.13585E-05	9.1919E-07	2.22297E-05	1.15947E-06	5.80422E-06	0	0	0
COA-PWY: coenzyme A biosynthesis I|g__Shigella.s__Shigella_flexneri	0	0	0	0	0	0	0	0	0	0	0	2.9117E-07
COA-PWY: coenzyme A biosynthesis I|g__Streptococcus.s__Streptococcus_australis	0	3.64601E-07	0	0	0	0	0	2.36975E-07	0	0	0	2.40113E-07
COA-PWY: coenzyme A biosynthesis I|g__Streptococcus.s__Streptococcus_gordonii	0	0	0	0	0	0	0	2.21002E-07	0	0	0	0
COA-PWY: coenzyme A biosynthesis I|g__Streptococcus.s__Streptococcus_infantis	0	2.5701E-06	4.22545E-07	0	0	0	0	2.04259E-07	0	0	0	0
COA-PWY: coenzyme A biosynthesis I|g__Streptococcus.s__Streptococcus_mitis_oralis_pneumoniae	0	2.10338E-06	2.94206E-07	0	0	3.87411E-07	0	0	0	0	0	0
COA-PWY: coenzyme A biosynthesis I|g__Streptococcus.s__Streptococcus_mutans	0	0	0	0	0	2.55847E-07	0	0	0	0	0	0
COA-PWY: coenzyme A biosynthesis I|g__Streptococcus.s__Streptococcus_parasanguinis	0	0	0	0	6.33882E-07	3.99177E-06	0	2.38384E-06	0	0	2.53718E-07	2.01807E-06
COA-PWY: coenzyme A biosynthesis I|g__Veillonella.s__Veillonella_atypica	0	0	0	0	0	1.35404E-06	0	1.89472E-07	0	1.75603E-07	0	0
COA-PWY: coenzyme A biosynthesis I|g__Veillonella.s__Veillonella_dispar	0	0	0	0	0	2.05032E-06	0	0	0	0	0	0
COA-PWY: coenzyme A biosynthesis I|g__Veillonella.s__Veillonella_parvula	0	0	0	0	0	2.82193E-06	0	8.69839E-08	0	6.01818E-07	0	1.91043E-07
COA-PWY: coenzyme A biosynthesis I|unclassified	4.38941E-05	1.97725E-05	3.73238E-05	3.74623E-05	5.54716E-05	4.0658E-05	6.0609E-05	3.62593E-05	2.39692E-05	1.72495E-05	3.46349E-05	5.55397E-05
COBALSYN-PWY: adenosylcobalamin salvage from cobinamide I|g__Blautia.s__Ruminococcus_obeum	0	0	7.01329E-07	5.21478E-06	3.87194E-07	0	1.06609E-06	1.47524E-06	0	1.35205E-07	0	0
COBALSYN-PWY: adenosylcobalamin salvage from cobinamide I|g__Coprococcus.s__Coprococcus_catus	9.32207E-07	1.33535E-06	0	1.56624E-06	7.02266E-07	5.48009E-07	1.35073E-06	9.60437E-07	2.52231E-07	6.94789E-07	0	0
COBALSYN-PWY: adenosylcobalamin salvage from cobinamide I|g__Escherichia.s__Escherichia_coli	0	5.34488E-07	1.38832E-06	4.09207E-07	1.12434E-06	1.42361E-05	0	6.06386E-06	0	1.24262E-07	4.99654E-07	4.71017E-07
COBALSYN-PWY: adenosylcobalamin salvage from cobinamide I|g__Eubacterium.s__Eubacterium_rectale	9.84582E-06	0.00012018	0	8.51029E-05	0	7.81449E-06	3.72312E-05	1.67205E-06	1.65476E-05	2.65686E-06	0	2.71683E-06
COBALSYN-PWY: adenosylcobalamin salvage from cobinamide I|g__Faecalibacterium.s__Faecalibacterium_prausnitzii	5.69082E-05	0	3.73663E-05	1.06429E-05	0.000128217	1.58952E-05	2.33652E-05	1.25325E-05	3.20846E-05	1.45103E-05	0	1.37788E-05
COBALSYN-PWY: adenosylcobalamin salvage from cobinamide I|g__Megamonas.s__Megamonas_rupellensis	3.6971E-05	0	0	0	0	0	0	0	0	0	0	0
COBALSYN-PWY: adenosylcobalamin salvage from cobinamide I|g__Phascolarctobacterium.s__Phascolarctobacterium_succinatutens	1.35248E-05	0	0	0	0	0	0	5.17176E-06	0	0	0	0
COBALSYN-PWY: adenosylcobalamin salvage from cobinamide I|g__Roseburia.s__Roseburia_intestinalis	8.90219E-06	4.0086E-06	0	1.71706E-05	8.40936E-05	9.9647E-07	2.98669E-05	1.3202E-06	7.36093E-06	0	0	0
COBALSYN-PWY: adenosylcobalamin salvage from cobinamide I|g__Shigella.s__Shigella_flexneri	0	0	0	0	0	0	0	0	0	0	0	5.39975E-07
COBALSYN-PWY: adenosylcobalamin salvage from cobinamide I|unclassified	2.78042E-05	0	9.58428E-06	2.39901E-05	9.21837E-05	2.36996E-05	2.66984E-05	6.66943E-06	1.58922E-05	1.35683E-05	1.65874E-05	1.16493E-05
COLANSYN-PWY: colanic acid building blocks biosynthesis|g__Escherichia.s__Escherichia_coli	0	2.05159E-07	2.24631E-06	3.39468E-07	4.28666E-07	8.38099E-06	0	4.55326E-06	0	0	2.53319E-07	5.06073E-07
COLANSYN-PWY: colanic acid building blocks biosynthesis|unclassified	0	0	0	0	0	0	0	4.60032E-06	0	0	0	7.98342E-06
COMPLETE-ARO-PWY: superpathway of aromatic amino acid biosynthesis|g__Akkermansia.s__Akkermansia_muciniphila	8.70697E-06	2.08373E-06	0	0	0	0	5.19135E-07	7.02672E-05	1.23533E-06	4.77304E-06	0	1.52176E-06
COMPLETE-ARO-PWY: superpathway of aromatic amino acid biosynthesis|g__Anaerostipes.s__Anaerostipes_hadrus	5.70363E-06	2.29163E-06	1.05481E-05	1.10841E-05	0	0.0004648	2.38156E-06	1.62288E-07	0	3.40105E-06	0	4.08438E-06
COMPLETE-ARO-PWY: superpathway of aromatic amino acid biosynthesis|g__Blautia.s__Ruminococcus_gnavus	3.53069E-07	1.23742E-06	6.7633E-07	4.07616E-07	0	0	0	0	0	0	6.28297E-06	0
COMPLETE-ARO-PWY: superpathway of aromatic amino acid biosynthesis|g__Blautia.s__Ruminococcus_obeum	6.57844E-07	0	7.76155E-07	1.48584E-05	1.52586E-06	8.98524E-07	7.20972E-06	9.96193E-06	0	1.05488E-06	1.81203E-05	1.53893E-05
COMPLETE-ARO-PWY: superpathway of aromatic amino acid biosynthesis|g__Blautia.s__Ruminococcus_torques	3.49396E-05	2.96796E-05	5.97828E-06	9.56343E-06	2.79594E-05	1.78484E-05	5.2444E-06	1.09575E-05	1.48831E-06	2.15786E-06	6.93976E-06	0
COMPLETE-ARO-PWY: superpathway of aromatic amino acid biosynthesis|g__Clostridiales_noname.s__Clostridiales_bacterium_1_7_47FAA	0	0	0	0	0	0	0	0	0	0	2.11801E-07	0
COMPLETE-ARO-PWY: superpathway of aromatic amino acid biosynthesis|g__Clostridium.s__Clostridium_asparagiforme	0	4.70877E-07	0	0	0	0	0	0	0	0	0	0
COMPLETE-ARO-PWY: superpathway of aromatic amino acid biosynthesis|g__Clostridium.s__Clostridium_bolteae	0	0	0	0	0	0	0	0	0	0	5.79867E-07	0
COMPLETE-ARO-PWY: superpathway of aromatic amino acid biosynthesis|g__Clostridium.s__Clostridium_clostridioforme	3.26005E-07	0	0	0	0	0	0	0	0	0	4.50149E-07	0
COMPLETE-ARO-PWY: superpathway of aromatic amino acid biosynthesis|g__Clostridium.s__Clostridium_symbiosum	0	0	0	0	0	0	0	0	0	0	1.95662E-06	0
COMPLETE-ARO-PWY: superpathway of aromatic amino acid biosynthesis|g__Escherichia.s__Escherichia_coli	0	9.28891E-07	2.7318E-06	4.51274E-07	1.50053E-06	1.69399E-05	2.47837E-07	7.89912E-06	0	1.49063E-07	4.91833E-07	3.6979E-07
COMPLETE-ARO-PWY: superpathway of aromatic amino acid biosynthesis|g__Eubacterium.s__Eubacterium_eligens	0	0	1.00235E-05	0	0	1.69195E-05	1.40645E-05	2.27991E-06	7.61757E-07	3.3133E-06	0	7.58161E-06
COMPLETE-ARO-PWY: superpathway of aromatic amino acid biosynthesis|g__Eubacterium.s__Eubacterium_rectale	1.18435E-05	0.000149301	0	0.000113742	0	8.38749E-06	4.2281E-05	2.65442E-06	2.2142E-05	3.50346E-06	0	3.27716E-06
COMPLETE-ARO-PWY: superpathway of aromatic amino acid biosynthesis|g__Haemophilus.s__Haemophilus_parainfluenzae	0	0	0	0	0	2.87908E-07	0	0	0	1.20013E-06	0	0
COMPLETE-ARO-PWY: superpathway of aromatic amino acid biosynthesis|g__Klebsiella.s__Klebsiella_pneumoniae	0	0	0	0	0	3.60919E-07	0	2.12445E-06	0	0	0	0
COMPLETE-ARO-PWY: superpathway of aromatic amino acid biosynthesis|g__Lachnospiraceae_noname.s__Lachnospiraceae_bacterium_1_1_57FAA	0	0	1.36615E-06	0	0	0	0	0	0	0	0	0
COMPLETE-ARO-PWY: superpathway of aromatic amino acid biosynthesis|g__Lachnospiraceae_noname.s__Lachnospiraceae_bacterium_2_1_58FAA	0	1.1765E-06	1.04341E-06	5.70648E-07	0	0	0	0	0	0	6.91812E-06	0
COMPLETE-ARO-PWY: superpathway of aromatic amino acid biosynthesis|g__Lachnospiraceae_noname.s__Lachnospiraceae_bacterium_3_1_46FAA	0	0	1.61083E-06	3.76515E-06	0	0	5.76726E-07	2.29962E-07	6.97792E-07	0	0	0
COMPLETE-ARO-PWY: superpathway of aromatic amino acid biosynthesis|g__Lachnospiraceae_noname.s__Lachnospiraceae_bacterium_5_1_63FAA	5.88118E-06	0	1.28195E-05	1.10447E-05	0	4.5281E-07	2.86931E-06	2.79413E-07	0	3.52947E-06	0	5.96861E-06
COMPLETE-ARO-PWY: superpathway of aromatic amino acid biosynthesis|g__Lactococcus.s__Lactococcus_lactis	0	0	0	0	0	0	0	0	0	0	0	6.5856E-07
COMPLETE-ARO-PWY: superpathway of aromatic amino acid biosynthesis|g__Megamonas.s__Megamonas_rupellensis	3.09908E-05	0	0	0	0	0	0	0	0	0	0	0
COMPLETE-ARO-PWY: superpathway of aromatic amino acid biosynthesis|g__Megasphaera.s__Megasphaera_elsdenii	0	0	0	0	0	4.52897E-06	0	0	0	0	0	0
COMPLETE-ARO-PWY: superpathway of aromatic amino acid biosynthesis|g__Mitsuokella.s__Mitsuokella_multacida	0	0	0	0	0	1.07387E-06	0	0	0	0	0	0
COMPLETE-ARO-PWY: superpathway of aromatic amino acid biosynthesis|g__Phascolarctobacterium.s__Phascolarctobacterium_succinatutens	1.48634E-05	0	0	0	0	0	0	7.84912E-06	0	0	0	0
COMPLETE-ARO-PWY: superpathway of aromatic amino acid biosynthesis|g__Roseburia.s__Roseburia_hominis	2.07685E-06	4.17282E-07	2.61082E-06	5.5063E-07	0	1.24656E-06	1.43988E-06	0	0	0	0	0
COMPLETE-ARO-PWY: superpathway of aromatic amino acid biosynthesis|g__Roseburia.s__Roseburia_intestinalis	1.04075E-05	5.29486E-06	0	2.26348E-05	8.74496E-05	1.02754E-06	3.35637E-05	1.53371E-06	6.97027E-06	0	0	0
COMPLETE-ARO-PWY: superpathway of aromatic amino acid biosynthesis|g__Ruminococcus.s__Ruminococcus_sp_5_1_39BFAA	1.62639E-05	0	2.14035E-05	2.68477E-05	2.39943E-05	9.72944E-06	1.90843E-05	7.81112E-06	7.35271E-06	4.07316E-06	2.65893E-05	2.4519E-05
COMPLETE-ARO-PWY: superpathway of aromatic amino acid biosynthesis|g__Streptococcus.s__Streptococcus_parasanguinis	0	0	0	0	0	3.09908E-06	0	2.16726E-06	0	0	0	1.95721E-06
COMPLETE-ARO-PWY: superpathway of aromatic amino acid biosynthesis|g__Streptococcus.s__Streptococcus_salivarius	1.75808E-07	0	0	0	0	3.02954E-06	0	4.12335E-06	0	1.67997E-06	0	1.86774E-06
COMPLETE-ARO-PWY: superpathway of aromatic amino acid biosynthesis|g__Streptococcus.s__Streptococcus_sanguinis	0	0	0	0	0	1.42597E-07	0	0	0	0	0	0
COMPLETE-ARO-PWY: superpathway of aromatic amino acid biosynthesis|g__Streptococcus.s__Streptococcus_thermophilus	1.64154E-06	0	4.34033E-07	3.07391E-06	3.21287E-06	5.35739E-07	5.92241E-07	0	0	0	2.61328E-06	2.44441E-06
COMPLETE-ARO-PWY: superpathway of aromatic amino acid biosynthesis|g__Streptococcus.s__Streptococcus_vestibularis	0	0	0	0	0	1.61419E-06	0	2.80491E-06	0	1.05048E-06	0	0
COMPLETE-ARO-PWY: superpathway of aromatic amino acid biosynthesis|unclassified	9.79944E-05	4.9215E-05	9.67625E-05	0.000151928	0.000228863	0.000119413	0.000310941	0.000155601	0.000118076	0.000128466	8.33284E-05	0.000123297
CRNFORCAT-PWY: creatinine degradation I|unclassified	2.33248E-06	0	4.49217E-06	4.54432E-06	1.12331E-05	1.97955E-05	1.12414E-05	6.70037E-06	6.1029E-06	2.65466E-06	0	0
DAPLYSINESYN-PWY: L-lysine biosynthesis I|g__Actinomyces.s__Actinomyces_odontolyticus	0	0	0	0	0	0	0	3.75743E-07	0	0	0	0
DAPLYSINESYN-PWY: L-lysine biosynthesis I|g__Bifidobacterium.s__Bifidobacterium_animalis	0	0	0	0	0	0	0	0	0	0	0	2.80689E-07
DAPLYSINESYN-PWY: L-lysine biosynthesis I|g__Escherichia.s__Escherichia_coli	0	8.34237E-07	1.66999E-06	3.23215E-07	8.91498E-07	6.80344E-06	1.50324E-07	5.85807E-06	0	0	2.18685E-07	1.34416E-07
DAPLYSINESYN-PWY: L-lysine biosynthesis I|g__Haemophilus.s__Haemophilus_parainfluenzae	0	0	0	0	0	7.94962E-07	0	0	0	9.28984E-07	0	0
DAPLYSINESYN-PWY: L-lysine biosynthesis I|g__Klebsiella.s__Klebsiella_pneumoniae	0	0	0	0	0	2.62522E-07	0	1.74358E-06	0	0	0	0
DAPLYSINESYN-PWY: L-lysine biosynthesis I|g__Shigella.s__Shigella_flexneri	0	0	0	0	0	0	0	0	0	0	0	2.80888E-07
DAPLYSINESYN-PWY: L-lysine biosynthesis I|unclassified	0	0	4.34945E-06	3.98475E-06	0	1.6566E-07	2.86453E-06	0	2.25037E-06	5.26029E-06	0	0.003104
DENOVOPURINE2-PWY: superpathway of purine nucleotides de novo biosynthesis II|g__Haemophilus.s__Haemophilus_parainfluenzae	0	0	0	0	0	0	0	0	0	7.52946E-07	0	0
DENOVOPURINE2-PWY: superpathway of purine nucleotides de novo biosynthesis II|unclassified	3.2862E-05	2.58775E-05	4.60876E-05	4.13465E-05	3.91964E-06	2.31381E-05	8.24714E-05	5.28384E-05	8.49455E-05	7.06017E-05	0	4.88014E-06
DTDPRHAMSYN-PWY: dTDP-L-rhamnose biosynthesis I|g__Alistipes.s__Alistipes_shahii	5.76855E-06	0	0	5.04627E-06	0	1.12617E-05	0	2.28889E-05	1.09732E-05	2.82275E-05	0	0
DTDPRHAMSYN-PWY: dTDP-L-rhamnose biosynthesis I|g__Anaerostipes.s__Anaerostipes_hadrus	5.06103E-06	1.52324E-06	1.83318E-05	1.53215E-05	0	4.94513E-07	2.89589E-06	4.5527E-07	0	2.69839E-06	0	5.76727E-06
DTDPRHAMSYN-PWY: dTDP-L-rhamnose biosynthesis I|g__Bacteroides.s__Bacteroides_caccae	2.66721E-06	0	0	0	0	0	2.19839E-06	2.89228E-06	3.36303E-06	8.95356E-06	0	0
DTDPRHAMSYN-PWY: dTDP-L-rhamnose biosynthesis I|g__Bacteroides.s__Bacteroides_finegoldii	9.43126E-07	3.79406E-06	2.2594E-06	0	0	0	0	0	1.82468E-06	5.12732E-06	0	0
DTDPRHAMSYN-PWY: dTDP-L-rhamnose biosynthesis I|g__Bacteroides.s__Bacteroides_fragilis	0	0	7.4442E-06	0	0	2.92169E-06	1.39931E-05	1.93843E-05	0	0	9.66902E-06	1.53292E-06
DTDPRHAMSYN-PWY: dTDP-L-rhamnose biosynthesis I|g__Bacteroides.s__Bacteroides_ovatus	4.40826E-06	5.56703E-05	3.53343E-05	2.96191E-06	0	6.81774E-07	7.29792E-06	6.10772E-06	7.10603E-06	1.3893E-05	6.34939E-05	2.77326E-05
DTDPRHAMSYN-PWY: dTDP-L-rhamnose biosynthesis I|g__Bacteroides.s__Bacteroides_sp_2_1_22	0	0	0	0	0	0	0	0	6.07929E-07	1.37897E-06	0	0
DTDPRHAMSYN-PWY: dTDP-L-rhamnose biosynthesis I|g__Bacteroides.s__Bacteroides_xylanisolvens	0	0	2.0847E-05	4.15327E-07	0	6.52636E-06	1.61481E-05	2.83845E-06	0	1.51791E-06	0	0
DTDPRHAMSYN-PWY: dTDP-L-rhamnose biosynthesis I|g__Bifidobacterium.s__Bifidobacterium_animalis	0	0	0	0	0	0	0	0	0	0	0	2.5903E-07
DTDPRHAMSYN-PWY: dTDP-L-rhamnose biosynthesis I|g__Bifidobacterium.s__Bifidobacterium_dentium	0	0	0	0	0	7.6586E-08	0	0	0	0	0	0
DTDPRHAMSYN-PWY: dTDP-L-rhamnose biosynthesis I|g__Bifidobacterium.s__Bifidobacterium_longum	0	0	2.97163E-06	0	0	1.75805E-06	0	0	0	0	0	2.25197E-07
DTDPRHAMSYN-PWY: dTDP-L-rhamnose biosynthesis I|g__Blautia.s__Ruminococcus_obeum	6.07207E-07	3.2848E-07	8.72947E-07	1.50673E-05	1.92378E-06	7.23415E-07	6.84541E-06	1.08624E-05	9.94995E-07	6.47717E-07	1.58724E-05	1.62519E-05
DTDPRHAMSYN-PWY: dTDP-L-rhamnose biosynthesis I|g__Blautia.s__Ruminococcus_torques	0	0	0	0	0	0	0	0	0	1.48079E-06	4.39842E-07	0
DTDPRHAMSYN-PWY: dTDP-L-rhamnose biosynthesis I|g__Clostridium.s__Clostridium_clostridioforme	3.03086E-07	1.14378E-07	0	0	0	0	0	0	0	0	1.74758E-07	0
DTDPRHAMSYN-PWY: dTDP-L-rhamnose biosynthesis I|g__Coprococcus.s__Coprococcus_catus	1.14634E-06	1.5328E-06	0	1.44938E-06	3.47646E-07	2.37436E-07	0	0	6.32326E-07	7.18362E-07	0	0
DTDPRHAMSYN-PWY: dTDP-L-rhamnose biosynthesis I|g__Eggerthella.s__Eggerthella_lenta	2.59117E-07	0	0	0	0	0	0	0	0	0	0	0
DTDPRHAMSYN-PWY: dTDP-L-rhamnose biosynthesis I|g__Erysipelotrichaceae_noname.s__Eubacterium_biforme	0	0	0	0	0	3.02108E-06	0	1.7763E-07	1.02543E-06	1.23184E-06	0	0
DTDPRHAMSYN-PWY: dTDP-L-rhamnose biosynthesis I|g__Escherichia.s__Escherichia_coli	0	0	3.81265E-07	0	9.60607E-07	0	0	0	2.20219E-07	0	0	1.14754E-06
DTDPRHAMSYN-PWY: dTDP-L-rhamnose biosynthesis I|g__Eubacterium.s__Eubacterium_rectale	6.62909E-06	9.71896E-05	0	0.00011805	1.60395E-07	8.67186E-06	3.89997E-05	1.85035E-06	1.88778E-05	2.91532E-06	0	3.70744E-06
DTDPRHAMSYN-PWY: dTDP-L-rhamnose biosynthesis I|g__Faecalibacterium.s__Faecalibacterium_prausnitzii	8.42092E-05	6.65463E-07	7.42396E-05	2.79077E-05	0.00025004	3.4595E-05	4.33777E-05	2.15263E-05	5.58843E-05	3.17423E-05	1.01592E-06	3.06192E-05
DTDPRHAMSYN-PWY: dTDP-L-rhamnose biosynthesis I|g__Fusobacterium.s__Fusobacterium_mortiferum	5.58086E-07	0	0	0	0	0	0	0	0	0	0	0
DTDPRHAMSYN-PWY: dTDP-L-rhamnose biosynthesis I|g__Lachnospiraceae_noname.s__Lachnospiraceae_bacterium_5_1_63FAA	4.27476E-06	0	1.75218E-05	1.04955E-05	0	4.02557E-07	1.73E-06	0	0	3.33629E-06	0	4.90502E-06
DTDPRHAMSYN-PWY: dTDP-L-rhamnose biosynthesis I|g__Lactococcus.s__Lactococcus_lactis	0	0	0	5.80353E-07	0	0	0	0	0	0	0	4.64076E-07
DTDPRHAMSYN-PWY: dTDP-L-rhamnose biosynthesis I|g__Methanobrevibacter.s__Methanobrevibacter_smithii	0	0	0	0	3.0542E-07	3.36113E-06	0	0	1.23743E-06	2.70497E-06	0	0
DTDPRHAMSYN-PWY: dTDP-L-rhamnose biosynthesis I|g__Odoribacter.s__Odoribacter_splanchnicus	7.43226E-06	0	6.07642E-06	0	0	2.98203E-06	2.29477E-06	1.37286E-06	3.77011E-06	1.22781E-05	0	0
DTDPRHAMSYN-PWY: dTDP-L-rhamnose biosynthesis I|g__Roseburia.s__Roseburia_intestinalis	1.16455E-05	5.80973E-06	0	1.77846E-05	9.39868E-05	9.51965E-07	3.71337E-05	1.4088E-06	8.46214E-06	0	0	0
DTDPRHAMSYN-PWY: dTDP-L-rhamnose biosynthesis I|g__Streptococcus.s__Streptococcus_australis	0	0	1.46288E-07	0	0	0	0	1.85259E-07	0	0	0	0
DTDPRHAMSYN-PWY: dTDP-L-rhamnose biosynthesis I|g__Streptococcus.s__Streptococcus_sanguinis	0	2.70986E-07	0	0	0	1.67555E-07	0	0	0	1.06048E-07	1.35715E-07	1.5779E-07
DTDPRHAMSYN-PWY: dTDP-L-rhamnose biosynthesis I|g__Veillonella.s__Veillonella_atypica	0	0	0	0	0	5.16947E-07	0	0	0	0	0	0
DTDPRHAMSYN-PWY: dTDP-L-rhamnose biosynthesis I|unclassified	0.000119867	4.01369E-05	0.0001224	0.000134662	0.000259916	9.78071E-05	0.000220306	0.000116309	0.00011144	0.000125581	0.000135242	0.000131538
ECASYN-PWY: enterobacterial common antigen biosynthesis|g__Escherichia.s__Escherichia_coli	0	9.57962E-07	2.36835E-06	0	1.42606E-06	1.1611E-05	0	8.40444E-06	0	0	0	4.08747E-07
ENTBACSYN-PWY: enterobactin biosynthesis|g__Escherichia.s__Escherichia_coli	0	1.88765E-06	4.41746E-06	6.80178E-07	2.33846E-06	2.36467E-05	2.68491E-07	1.05486E-05	0	0	3.34453E-07	6.64417E-07
ENTBACSYN-PWY: enterobactin biosynthesis|g__Shigella.s__Shigella_flexneri	0	0	0	0	0	0	0	0	0	0	0	5.04214E-07
FAO-PWY: fatty acid &beta;-oxidation I|g__Escherichia.s__Escherichia_coli	0	4.80264E-08	2.09242E-06	2.60507E-07	1.02028E-06	1.32658E-06	6.25493E-08	2.24808E-06	0	0	3.98201E-08	7.21223E-07
FAO-PWY: fatty acid &beta;-oxidation I|unclassified	0	0	0	0	0	4.67673E-06	0	5.70835E-07	0	3.95524E-06	0	2.30292E-06
FASYN-ELONG-PWY: fatty acid elongation -- saturated|g__Bacteroides.s__Bacteroides_xylanisolvens	0	0	0	6.15762E-07	0	0	0	0	0	1.93062E-06	0	0
FASYN-ELONG-PWY: fatty acid elongation -- saturated|g__Enterobacter.s__Enterobacter_cloacae	0	0	8.91683E-07	0	0	1.04929E-07	0	4.21348E-07	0	0	0	0
FASYN-ELONG-PWY: fatty acid elongation -- saturated|g__Escherichia.s__Escherichia_coli	0	0.0004121	2.45995E-06	3.35912E-07	1.19751E-06	1.94969E-05	0	6.55075E-06	0	0	1.42385E-07	3.13411E-07
FASYN-ELONG-PWY: fatty acid elongation -- saturated|g__Haemophilus.s__Haemophilus_parainfluenzae	0	0	0	0	0	2.44188E-07	0	0	0	3.65029E-07	0	0
FASYN-ELONG-PWY: fatty acid elongation -- saturated|g__Klebsiella.s__Klebsiella_pneumoniae	0	0	0	0	0	1.3648E-07	0	2.04571E-06	0	0	0	0
FASYN-ELONG-PWY: fatty acid elongation -- saturated|unclassified	0	2.02363E-06	0	0	0	0	0	0	0	0	0	0
FASYN-INITIAL-PWY: superpathway of fatty acid biosynthesis initiation (E. coli)|g__Bacteroides.s__Bacteroides_xylanisolvens	0	0	0	5.70805E-07	0	0	0	0	0	1.3302E-06	0	0
FASYN-INITIAL-PWY: superpathway of fatty acid biosynthesis initiation (E. coli)|g__Escherichia.s__Escherichia_coli	0	2.6682E-07	1.85107E-06	9.03225E-08	6.74098E-07	1.26803E-05	8.02656E-08	5.97606E-06	0	0	2.07522E-07	1.50135E-07
FASYN-INITIAL-PWY: superpathway of fatty acid biosynthesis initiation (E. coli)|g__Haemophilus.s__Haemophilus_parainfluenzae	0	0	0	0	0	7.47982E-07	0	1.14291E-07	0	1.09973E-06	0	0
FASYN-INITIAL-PWY: superpathway of fatty acid biosynthesis initiation (E. coli)|g__Klebsiella.s__Klebsiella_pneumoniae	0	0	0	0	0	8.42424E-08	0	9.26875E-07	0	0	0	0
FASYN-INITIAL-PWY: superpathway of fatty acid biosynthesis initiation (E. coli)|g__Streptococcus.s__Streptococcus_sanguinis	0	0	0	0	0	0	0	1.38583E-07	0	1.72374E-07	0	0
FASYN-INITIAL-PWY: superpathway of fatty acid biosynthesis initiation (E. coli)|unclassified	0	1.35105E-06	0	0	0	0	0	0	0	0	0	0
FERMENTATION-PWY: mixed acid fermentation|g__Klebsiella.s__Klebsiella_pneumoniae	0	0	0	0	0	0	0	1.88694E-06	0	0	0	0
FERMENTATION-PWY: mixed acid fermentation|unclassified	2.15585E-06	0	0	2.40059E-06	4.83402E-06	0	2.18792E-06	9.66064E-06	0	2.3569E-06	0	0
FOLSYN-PWY: superpathway of tetrahydrofolate biosynthesis and salvage|g__Escherichia.s__Escherichia_coli	0	0	2.18537E-06	2.37756E-07	6.84401E-07	9.79869E-06	0	4.95209E-06	0	0	3.03724E-07	0.0001135
FOLSYN-PWY: superpathway of tetrahydrofolate biosynthesis and salvage|g__Lactococcus.s__Lactococcus_lactis	0	0	0	0	0	0	0	0	0	0	0	3.84465E-07
FOLSYN-PWY: superpathway of tetrahydrofolate biosynthesis and salvage|unclassified	0	0	1.23211E-05	0	0	0	0	0.01084	0	0	0	1.03256E-05
FUC-RHAMCAT-PWY: superpathway of fucose and rhamnose degradation|g__Escherichia.s__Escherichia_coli	0	7.90582E-07	2.30216E-06	4.78549E-07	1.6527E-06	1.85452E-05	1.03758E-07	9.33207E-06	0	0	4.71118E-07	6.41653E-07
FUC-RHAMCAT-PWY: superpathway of fucose and rhamnose degradation|unclassified	0	0	0	0	0	3.61096E-06	0	2.80984E-06	0	0	0	0
FUCCAT-PWY: fucose degradation|g__Escherichia.s__Escherichia_coli	0	8.67617E-07	3.45728E-06	4.40797E-07	2.61812E-06	2.04843E-05	3.26913E-07	1.04552E-05	1.13339E-07	2.19001E-07	7.13484E-07	7.0155E-07
FUCCAT-PWY: fucose degradation|g__Klebsiella.s__Klebsiella_pneumoniae	0	0	0	0	0	0	0	1.19785E-06	0	0	0	0
FUCCAT-PWY: fucose degradation|g__Shigella.s__Shigella_flexneri	0	0	0	0	0	0	0	0	0	0	0	2.29833E-07
FUCCAT-PWY: fucose degradation|unclassified	2.12996E-06	0	2.20726E-06	0	0	1.06469E-05	1.95762E-06	1.33209E-06	0	0	1.01711E-07	0
GALACT-GLUCUROCAT-PWY: superpathway of hexuronide and hexuronate degradation|g__Escherichia.s__Escherichia_coli	0	7.58759E-07	2.77265E-06	3.42029E-07	1.02656E-06	1.64805E-05	3.13199E-07	8.41972E-06	0	0	2.34109E-07	3.91972E-07
GALACT-GLUCUROCAT-PWY: superpathway of hexuronide and hexuronate degradation|g__Faecalibacterium.s__Faecalibacterium_prausnitzii	6.97768E-05	3.7729E-07	7.13067E-05	1.94116E-05	0.000220071	3.31676E-05	3.85424E-05	1.8362E-05	5.25042E-05	2.69784E-05	6.26015E-07	3.0568E-05
GALACT-GLUCUROCAT-PWY: superpathway of hexuronide and hexuronate degradation|g__Lactococcus.s__Lactococcus_lactis	0	0	0	0	0	0	0	0	0	0	0	4.95085E-07
GALACT-GLUCUROCAT-PWY: superpathway of hexuronide and hexuronate degradation|g__Shigella.s__Shigella_flexneri	0	0	0	0	0	0	0	0	0	0	0	1.75843E-07
GALACT-GLUCUROCAT-PWY: superpathway of hexuronide and hexuronate degradation|unclassified	3.04966E-05	1.20665E-06	2.41333E-05	1.53816E-05	5.19549E-05	2.29546E-05	3.90846E-05	3.09952E-05	1.72647E-05	6.39893E-06	1.77947E-05	1.98652E-05
GALACTARDEG-PWY: D-galactarate degradation I|g__Enterobacter.s__Enterobacter_cloacae	0	0	3.20425E-07	0	0	6.84903E-08	0	1.95015E-07	0	0	0	0
GALACTARDEG-PWY: D-galactarate degradation I|g__Escherichia.s__Escherichia_coli	0	1.02424E-06	2.52461E-06	4.89766E-07	1.34629E-06	3.6141E-06	1.16625E-07	5.00761E-06	0	0	3.84109E-07	4.31357E-07
GALACTARDEG-PWY: D-galactarate degradation I|g__Klebsiella.s__Klebsiella_pneumoniae	0	0	0	0	0	3.6623E-07	0	2.54086E-06	0	0	0	0
GALACTUROCAT-PWY: D-galacturonate degradation I|g__Alistipes.s__Alistipes_shahii	3.30939E-06	0	0	2.86755E-06	0	9.92044E-06	0	1.69981E-05	7.67552E-06	1.59909E-05	0	0
GALACTUROCAT-PWY: D-galacturonate degradation I|g__Escherichia.s__Escherichia_coli	0	8.86787E-07	2.49959E-06	4.07467E-07	8.58127E-07	1.60997E-05	3.22273E-07	7.67937E-06	0	0	2.3167E-07	3.91531E-07
GALACTUROCAT-PWY: D-galacturonate degradation I|g__Faecalibacterium.s__Faecalibacterium_prausnitzii	7.65433E-05	5.86509E-07	7.71211E-05	2.49735E-05	0.000230338	3.67387E-05	4.39089E-05	1.99161E-05	5.70583E-05	3.08557E-05	1.3122E-06	3.47525E-05
GALACTUROCAT-PWY: D-galacturonate degradation I|g__Lactococcus.s__Lactococcus_lactis	0	0	0	0	0	0	0	0	0	0	0	4.77021E-07
GALACTUROCAT-PWY: D-galacturonate degradation I|g__Shigella.s__Shigella_flexneri	0	0	0	0	0	0	0	0	0	0	0	2.58415E-07
GALACTUROCAT-PWY: D-galacturonate degradation I|unclassified	2.8215E-05	1.29226E-05	2.10602E-05	2.3191E-05	4.55528E-05	2.27978E-05	3.90748E-05	3.53467E-05	2.76973E-05	6.90683E-06	3.37732E-05	2.16963E-05
GLCMANNANAUT-PWY: superpathway of N-acetylglucosamine, N-acetylmannosamine and N-acetylneuraminate degradation|g__Blautia.s__Ruminococcus_torques	1.02545E-05	1.82393E-06	4.36076E-06	6.80818E-06	1.44832E-06	2.91644E-06	1.88619E-06	3.10469E-06	1.46323E-06	4.10727E-06	0	1.71804E-06
GLCMANNANAUT-PWY: superpathway of N-acetylglucosamine, N-acetylmannosamine and N-acetylneuraminate degradation|g__Dorea.s__Dorea_formicigenerans	0	0	0	0	3.1521E-07	0	0	0	0	6.29392E-07	0	2.18561E-07
GLCMANNANAUT-PWY: superpathway of N-acetylglucosamine, N-acetylmannosamine and N-acetylneuraminate degradation|g__Dorea.s__Dorea_longicatena	1.78718E-05	1.62851E-06	6.28966E-06	1.30465E-05	1.16117E-06	1.86365E-06	2.85644E-06	2.99409E-06	4.16715E-06	2.22092E-06	0	5.46114E-06
GLCMANNANAUT-PWY: superpathway of N-acetylglucosamine, N-acetylmannosamine and N-acetylneuraminate degradation|g__Escherichia.s__Escherichia_coli	0	7.32636E-07	3.01452E-06	4.74546E-07	1.37696E-06	1.57069E-05	1.95064E-07	8.28504E-06	1.53697E-07	0	3.70343E-07	4.06021E-07
GLCMANNANAUT-PWY: superpathway of N-acetylglucosamine, N-acetylmannosamine and N-acetylneuraminate degradation|g__Faecalibacterium.s__Faecalibacterium_prausnitzii	6.58629E-05	8.61178E-07	6.32781E-05	1.49374E-05	0.000205515	2.67967E-05	3.38812E-05	1.46393E-05	4.38281E-05	2.52231E-05	3.4745E-07	2.85328E-05
GLCMANNANAUT-PWY: superpathway of N-acetylglucosamine, N-acetylmannosamine and N-acetylneuraminate degradation|g__Haemophilus.s__Haemophilus_parainfluenzae	0	0	1.61975E-07	0	0	6.58028E-07	0	0	0	4.45037E-07	0	0
GLCMANNANAUT-PWY: superpathway of N-acetylglucosamine, N-acetylmannosamine and N-acetylneuraminate degradation|g__Megamonas.s__Megamonas_rupellensis	3.35962E-05	0	0	0	0	0	0	0	0	0	0	0
GLCMANNANAUT-PWY: superpathway of N-acetylglucosamine, N-acetylmannosamine and N-acetylneuraminate degradation|g__Shigella.s__Shigella_flexneri	0	0	0	0	0	0	0	0	0	0	0	1.08063E-07
GLCMANNANAUT-PWY: superpathway of N-acetylglucosamine, N-acetylmannosamine and N-acetylneuraminate degradation|g__Streptococcus.s__Streptococcus_gordonii	0	0	0	0	0	1.09096E-07	0	8.76854E-08	0	7.09473E-08	0	0
GLCMANNANAUT-PWY: superpathway of N-acetylglucosamine, N-acetylmannosamine and N-acetylneuraminate degradation|unclassified	4.32833E-05	1.61463E-05	1.9992E-05	2.11318E-05	3.65753E-05	1.98113E-05	2.6063E-05	1.48417E-05	9.13874E-06	1.3834E-05	9.25139E-05	2.55336E-05
GLUCARDEG-PWY: D-glucarate degradation I|g__Enterobacter.s__Enterobacter_cloacae	0	0	3.43559E-07	0	0	7.12483E-08	0	2.33319E-07	0	0	0	0
GLUCARDEG-PWY: D-glucarate degradation I|g__Escherichia.s__Escherichia_coli	0	1.04142E-06	2.52461E-06	3.7501E-07	1.38449E-06	3.92049E-06	1.50597E-07	6.67666E-06	0	0	5.09136E-07	6.9142E-07
GLUCARGALACTSUPER-PWY: superpathway of D-glucarate and D-galactarate degradation|g__Enterobacter.s__Enterobacter_cloacae	0	0	3.20425E-07	0	0	6.84903E-08	0	1.95015E-07	0	0	0	0
GLUCARGALACTSUPER-PWY: superpathway of D-glucarate and D-galactarate degradation|g__Escherichia.s__Escherichia_coli	0	1.02424E-06	2.52461E-06	4.89766E-07	1.34629E-06	3.6141E-06	1.16625E-07	5.00761E-06	0	0	3.84109E-07	4.31357E-07
GLUCARGALACTSUPER-PWY: superpathway of D-glucarate and D-galactarate degradation|g__Klebsiella.s__Klebsiella_pneumoniae	0	0	0	0	0	3.6623E-07	0	2.54086E-06	0	0	0	0
GLUCONEO-PWY: gluconeogenesis I|g__Enterobacter.s__Enterobacter_cloacae	0	0	6.23227E-07	0	0	0	0	5.98118E-07	0	0	0	0
GLUCONEO-PWY: gluconeogenesis I|unclassified	1.09399E-05	1.37279E-05	1.50118E-05	1.97431E-05	0	2.9596E-05	1.9296E-05	5.75335E-05	3.66413E-05	4.09354E-05	8.18377E-06	5.37227E-06
GLUCOSE1PMETAB-PWY: glucose and glucose-1-phosphate degradation|g__Escherichia.s__Escherichia_coli	0	1.7692E-06	2.62732E-06	3.43032E-07	2.33717E-06	1.91265E-05	0	8.11278E-06	1.54989E-07	1.44308E-07	4.37383E-07	3.98731E-07
GLUCOSE1PMETAB-PWY: glucose and glucose-1-phosphate degradation|g__Klebsiella.s__Klebsiella_pneumoniae	0	0	0	0	0	7.73952E-08	0	2.00076E-06	0	0	0	0
GLUCOSE1PMETAB-PWY: glucose and glucose-1-phosphate degradation|g__Shigella.s__Shigella_flexneri	0	0	0	0	0	0	0	0	0	0	0	2.89608E-07
GLUCUROCAT-PWY: superpathway of &beta;-D-glucuronide and D-glucuronate degradation|g__Escherichia.s__Escherichia_coli	0	6.69612E-07	2.85412E-06	3.0393E-07	1.12909E-06	1.85684E-05	3.75912E-07	8.91721E-06	0	0	2.75061E-07	3.7243E-07
GLUCUROCAT-PWY: superpathway of &beta;-D-glucuronide and D-glucuronate degradation|g__Faecalibacterium.s__Faecalibacterium_prausnitzii	7.10938E-05	4.27423E-07	7.34706E-05	1.84638E-05	0.000227737	3.45058E-05	3.9194E-05	1.95127E-05	5.27916E-05	2.75249E-05	0.0005907	2.9587E-05
GLUCUROCAT-PWY: superpathway of &beta;-D-glucuronide and D-glucuronate degradation|g__Lactococcus.s__Lactococcus_lactis	0	0	0	0	0	0	0	0	0	0	0	5.99068E-07
GLUCUROCAT-PWY: superpathway of &beta;-D-glucuronide and D-glucuronate degradation|g__Shigella.s__Shigella_flexneri	0	0	0	0	0	0	0	0	0	0	0	2.45042E-07
GLUCUROCAT-PWY: superpathway of &beta;-D-glucuronide and D-glucuronate degradation|unclassified	3.48228E-05	8.29153E-07	2.62353E-05	1.27031E-05	5.24641E-05	2.28356E-05	3.83204E-05	2.79716E-05	1.4169E-05	6.11684E-06	1.43986E-05	1.82719E-05
GLUDEG-I-PWY: GABA shunt|unclassified	1.40498E-06	0	0	0	0	0	0	3.8605E-06	0	0	0	0
GLUTORN-PWY: L-ornithine biosynthesis|g__Bifidobacterium.s__Bifidobacterium_longum	5.3477E-07	0	2.54897E-05	0	0	1.12091E-06	0	0	3.77783E-07	1.31447E-07	0	2.49357E-07
GLUTORN-PWY: L-ornithine biosynthesis|g__Blautia.s__Ruminococcus_torques	2.66469E-05	2.19839E-05	4.56139E-06	5.30795E-06	2.0264E-05	1.53523E-05	6.09723E-06	1.32609E-05	8.78259E-07	1.98066E-06	1.75198E-07	0
GLUTORN-PWY: L-ornithine biosynthesis|g__Burkholderiales_noname.s__Burkholderiales_bacterium_1_1_47	0	0	0	0	0	0	1.27243E-06	0	0	1.13574E-07	0	0
GLUTORN-PWY: L-ornithine biosynthesis|g__Coprococcus.s__Coprococcus_catus	1.57792E-06	1.73539E-06	0	2.69902E-06	3.90868E-06	6.10185E-07	9.84236E-07	1.21053E-06	8.2293E-07	1.29492E-06	0	0
GLUTORN-PWY: L-ornithine biosynthesis|g__Escherichia.s__Escherichia_coli	0	1.01924E-06	2.75505E-06	3.12493E-07	1.02915E-06	3.89227E-06	0	7.80125E-06	1.70378E-07	0	3.1456E-07	2.63545E-07
GLUTORN-PWY: L-ornithine biosynthesis|g__Eubacterium.s__Eubacterium_siraeum	0	0	0	0	2.70263E-06	2.44594E-05	0	0	1.54845E-05	0	0	0
GLUTORN-PWY: L-ornithine biosynthesis|g__Klebsiella.s__Klebsiella_pneumoniae	0	0	0	0	0	2.72948E-07	0	1.41764E-06	0	0	0	0
GLUTORN-PWY: L-ornithine biosynthesis|g__Lactococcus.s__Lactococcus_lactis	0	0	0	5.47791E-07	2.68233E-07	0	0	0	1.09627E-07	0	0	7.23663E-07
GLUTORN-PWY: L-ornithine biosynthesis|g__Morganella.s__Morganella_morganii	0	0	0	0	0	9.90232E-08	0	0	0	0	0	0
GLUTORN-PWY: L-ornithine biosynthesis|g__Parasutterella.s__Parasutterella_excrementihominis	0	0	0	0	0	0	2.85443E-06	0	0	0	0	0
GLUTORN-PWY: L-ornithine biosynthesis|g__Shigella.s__Shigella_flexneri	0	0	0	0	0	0	0	0	0	0	0	1.72843E-07
GLUTORN-PWY: L-ornithine biosynthesis|g__Streptococcus.s__Streptococcus_mutans	0	0	0	0	0	3.11858E-07	0	4.45597E-07	0	0	0	0
GLUTORN-PWY: L-ornithine biosynthesis|g__Veillonella.s__Veillonella_dispar	0	0	0	0	0	1.7325E-06	0	0	0	0	0	0
GLUTORN-PWY: L-ornithine biosynthesis|g__Veillonella.s__Veillonella_parvula	0	0	0	0	0	2.48405E-06	0	0	0	9.06678E-07	0	0
GLUTORN-PWY: L-ornithine biosynthesis|unclassified	8.00005E-06	1.73064E-05	4.65608E-06	4.08657E-05	1.51823E-05	2.79363E-05	2.02122E-06	2.05252E-05	1.37065E-05	2.29165E-05	2.01136E-05	5.11298E-06
GLYCOGENSYNTH-PWY: glycogen biosynthesis I (from ADP-D-Glucose)|g__Anaerostipes.s__Anaerostipes_hadrus	9.26029E-06	3.71636E-06	2.05366E-05	1.78466E-05	0	7.46182E-07	4.8513E-06	4.20712E-07	0	5.08727E-06	0	7.15917E-06
GLYCOGENSYNTH-PWY: glycogen biosynthesis I (from ADP-D-Glucose)|g__Blautia.s__Ruminococcus_obeum	8.91712E-07	0	4.01094E-07	1.35188E-05	2.46481E-06	1.00834E-06	7.12712E-06	1.12181E-05	6.29987E-07	1.25562E-06	1.59497E-05	1.41449E-05
GLYCOGENSYNTH-PWY: glycogen biosynthesis I (from ADP-D-Glucose)|g__Coprococcus.s__Coprococcus_catus	7.41712E-07	1.1797E-06	0	1.62146E-06	1.04194E-06	2.9804E-07	8.28361E-07	9.65814E-07	6.26788E-07	6.78186E-07	0	0
GLYCOGENSYNTH-PWY: glycogen biosynthesis I (from ADP-D-Glucose)|g__Coprococcus.s__Coprococcus_eutactus	0	0	0	0	1.11354E-05	0	0	3.60672E-06	0	0	0	0
GLYCOGENSYNTH-PWY: glycogen biosynthesis I (from ADP-D-Glucose)|g__Enterobacter.s__Enterobacter_cloacae	0	0	3.21517E-07	0	0	0	0	4.92015E-07	0	0	0	0
GLYCOGENSYNTH-PWY: glycogen biosynthesis I (from ADP-D-Glucose)|g__Erysipelotrichaceae_noname.s__Eubacterium_biforme	0	0	0	0	0	7.00921E-06	0	1.83416E-06	3.40569E-06	2.85015E-06	0	0
GLYCOGENSYNTH-PWY: glycogen biosynthesis I (from ADP-D-Glucose)|g__Escherichia.s__Escherichia_coli	0	1.41959E-07	2.31795E-06	2.97309E-07	2.89492E-07	9.62394E-06	0	3.89802E-06	0	0	2.55905E-07	2.65211E-07
GLYCOGENSYNTH-PWY: glycogen biosynthesis I (from ADP-D-Glucose)|g__Eubacterium.s__Eubacterium_rectale	1.3365E-05	0.000187658	1.33233E-07	0.000130134	1.25814E-07	8.93218E-06	4.88939E-05	2.61485E-06	2.41878E-05	3.42286E-06	0	4.20467E-06
GLYCOGENSYNTH-PWY: glycogen biosynthesis I (from ADP-D-Glucose)|g__Eubacterium.s__Eubacterium_siraeum	0	1.56337E-07	4.77241E-06	0	3.18174E-06	2.93773E-05	0	0	1.81943E-05	1.66813E-07	0	1.39104E-07
GLYCOGENSYNTH-PWY: glycogen biosynthesis I (from ADP-D-Glucose)|g__Fusobacterium.s__Fusobacterium_mortiferum	4.18478E-07	0	0	0	0	0	0	0	0	0	0	0
GLYCOGENSYNTH-PWY: glycogen biosynthesis I (from ADP-D-Glucose)|g__Klebsiella.s__Klebsiella_pneumoniae	0	0	0	0	0	2.83207E-07	0	1.45286E-06	0	0	0	0
GLYCOGENSYNTH-PWY: glycogen biosynthesis I (from ADP-D-Glucose)|g__Lachnospiraceae_noname.s__Lachnospiraceae_bacterium_5_1_63FAA	3.17803E-06	0	1.65567E-05	1.07434E-05	0	1.96288E-07	2.59589E-06	4.5316E-07	0	3.73382E-06	0	4.47733E-06
GLYCOGENSYNTH-PWY: glycogen biosynthesis I (from ADP-D-Glucose)|g__Roseburia.s__Roseburia_intestinalis	9.21434E-06	4.67353E-06	0	1.82254E-05	9.13999E-05	1.03798E-06	3.31112E-05	1.2939E-06	7.33133E-06	1.79758E-07	0	0
GLYCOGENSYNTH-PWY: glycogen biosynthesis I (from ADP-D-Glucose)|g__Shigella.s__Shigella_flexneri	0	0	0	0	0	0	0	0	0	0	0	2.95692E-07
GLYCOGENSYNTH-PWY: glycogen biosynthesis I (from ADP-D-Glucose)|unclassified	6.38405E-05	4.66501E-05	5.83589E-05	0.000122444	0.000162767	7.46631E-05	0.000196552	8.35169E-05	6.89041E-05	5.91941E-05	7.06897E-05	0.000118185
GLYCOL-GLYOXDEG-PWY: superpathway of glycol metabolism and degradation|g__Escherichia.s__Escherichia_coli	0	1.03328E-06	1.7511E-06	1.89395E-07	2.20898E-06	1.56571E-05	5.98506E-08	8.8761E-06	1.20426E-07	0	2.95994E-07	1.9032E-07
GLYCOLYSIS-E-D: superpathway of glycolysis and Entner-Doudoroff|g__Enterobacter.s__Enterobacter_cloacae	0	0	9.43331E-08	0	0	0	0	3.18713E-07	0	0	0	0
GLYCOLYSIS-E-D: superpathway of glycolysis and Entner-Doudoroff|g__Escherichia.s__Escherichia_coli	0	8.64778E-07	2.49357E-06	0	1.35451E-06	1.29823E-05	2.05797E-07	8.21753E-06	0	0	3.54985E-07	0
GLYCOLYSIS-E-D: superpathway of glycolysis and Entner-Doudoroff|unclassified	0	0	7.45236E-06	0	0	4.88546E-06	0	5.90395E-06	0	3.22435E-06	0	3.01836E-06
GLYCOLYSIS-TCA-GLYOX-BYPASS: superpathway of glycolysis, pyruvate dehydrogenase, TCA, and glyoxylate bypass|g__Escherichia.s__Escherichia_coli	0	1.06852E-06	2.68782E-06	0	1.59225E-06	1.58888E-05	1.75704E-07	9.21825E-06	0	0	2.91397E-07	0.0005371
GLYCOLYSIS: glycolysis I (from glucose 6-phosphate)|g__Enterobacter.s__Enterobacter_cloacae	0	0	7.70448E-08	0	0	0	0	2.78289E-07	0	0	0	0
GLYCOLYSIS: glycolysis I (from glucose 6-phosphate)|g__Escherichia.s__Escherichia_coli	0	1.00961E-06	2.72196E-06	0	1.51261E-06	1.31097E-05	2.26367E-07	9.07973E-06	0	0	4.33365E-07	5.84964E-07
GLYCOLYSIS: glycolysis I (from glucose 6-phosphate)|g__Lactococcus.s__Lactococcus_lactis	0	0	0	0	0	0	0	0	0	0	0	5.27316E-07
GLYCOLYSIS: glycolysis I (from glucose 6-phosphate)|unclassified	0	1.60826E-05	2.9378E-05	1.35346E-05	0	3.93841E-05	1.42114E-05	5.93882E-05	4.43872E-05	4.46389E-05	4.55929E-06	4.1826E-06
GLYOXYLATE-BYPASS: glyoxylate cycle|g__Enterobacter.s__Enterobacter_cloacae	0	0	6.22982E-07	0	0	9.98549E-08	0	7.67509E-07	0	0	0	0
GLYOXYLATE-BYPASS: glyoxylate cycle|g__Escherichia.s__Escherichia_coli	0	1.58441E-06	3.23416E-06	4.35179E-07	1.9697E-06	2.09129E-05	1.29431E-07	1.01365E-05	2.13656E-07	0	5.7272E-07	6.12184E-07
GLYOXYLATE-BYPASS: glyoxylate cycle|g__Klebsiella.s__Klebsiella_pneumoniae	0	0	0	0	0	0	0	1.77445E-06	0	0	0	0
GLYOXYLATE-BYPASS: glyoxylate cycle|g__Shigella.s__Shigella_flexneri	0	0	0	0	0	0	0	0	0	0	0	2.01495E-07
GOLPDLCAT-PWY: superpathway of glycerol degradation to 1,3-propanediol|g__Escherichia.s__Escherichia_coli	0	0	0	0	0	5.51936E-08	0	0	0	0	0	1.32982E-07
GOLPDLCAT-PWY: superpathway of glycerol degradation to 1,3-propanediol|g__Klebsiella.s__Klebsiella_pneumoniae	0	0	0	0	0	9.85561E-08	0	1.14729E-06	0	0	0	0
GOLPDLCAT-PWY: superpathway of glycerol degradation to 1,3-propanediol|g__Megamonas.s__Megamonas_hypermegale	6.21637E-05	0	0	0	0	0	0	0	0	0	0	0
GOLPDLCAT-PWY: superpathway of glycerol degradation to 1,3-propanediol|g__Shigella.s__Shigella_flexneri	0	0	0	0	0	0	0	0	0	0	0	7.27025E-08
GOLPDLCAT-PWY: superpathway of glycerol degradation to 1,3-propanediol|g__Streptococcus.s__Streptococcus_sanguinis	0	1.84388E-07	0	0	0	1.96845E-07	0	1.34587E-07	0	0	5.88136E-08	2.55366E-07
GOLPDLCAT-PWY: superpathway of glycerol degradation to 1,3-propanediol|unclassified	1.03942E-05	2.38106E-06	1.55461E-05	1.60351E-05	1.70916E-05	5.27278E-06	1.1863E-05	8.15588E-06	4.81568E-06	7.7246E-06	7.6648E-06	6.36024E-06
HCAMHPDEG-PWY: 3-phenylpropanoate and 3-(3-hydroxyphenyl)propanoate degradation to 2-oxopent-4-enoate|g__Escherichia.s__Escherichia_coli	0	4.79995E-07	3.95382E-06	2.23432E-07	9.56333E-07	1.62961E-07	0	4.80057E-06	0	0	0	3.56552E-07
HCAMHPDEG-PWY: 3-phenylpropanoate and 3-(3-hydroxyphenyl)propanoate degradation to 2-oxopent-4-enoate|g__Klebsiella.s__Klebsiella_pneumoniae	0	0	0	0	0	1.73876E-07	0	8.05762E-07	0	0	0	0
HEME-BIOSYNTHESIS-II: heme biosynthesis I (aerobic)|g__Enterobacter.s__Enterobacter_cloacae	0	0	5.18431E-07	0	0	0	0	3.40219E-07	0	0	0	0
HEME-BIOSYNTHESIS-II: heme biosynthesis I (aerobic)|g__Veillonella.s__Veillonella_dispar	0	0	0	0	0	1.31198E-06	0	0	0	0	0	0
HEME-BIOSYNTHESIS-II: heme biosynthesis I (aerobic)|unclassified	0	0	6.23433E-06	0	0	3.23333E-07	1.17236E-06	7.40113E-07	0	0	0	0
HEMESYN2-PWY: heme biosynthesis II (anaerobic)|g__Actinomyces.s__Actinomyces_odontolyticus	0	0	0	0	0	0	0	4.05829E-07	0	0	0	0
HEMESYN2-PWY: heme biosynthesis II (anaerobic)|g__Enterobacter.s__Enterobacter_cloacae	0	0	5.07873E-07	0	0	0	0	3.52078E-07	0	0	0	0
HEMESYN2-PWY: heme biosynthesis II (anaerobic)|g__Escherichia.s__Escherichia_coli	0	9.48512E-07	3.00339E-06	6.10431E-07	1.4923E-06	2.13113E-05	4.75245E-07	9.2255E-06	1.51211E-07	0	0	5.20114E-07
HEMESYN2-PWY: heme biosynthesis II (anaerobic)|g__Haemophilus.s__Haemophilus_parainfluenzae	0	0	1.14791E-07	0	0	1.04739E-06	0	0	0	9.3723E-07	0	0
HEMESYN2-PWY: heme biosynthesis II (anaerobic)|g__Sutterella.s__Sutterella_wadsworthensis	4.9951E-06	0	0	0	0	4.88726E-06	0	7.01833E-06	0	0	0	0
HEMESYN2-PWY: heme biosynthesis II (anaerobic)|g__Veillonella.s__Veillonella_atypica	0	0	0	0	0	1.27202E-06	0	1.34429E-07	0	1.51612E-07	0	0
HEMESYN2-PWY: heme biosynthesis II (anaerobic)|unclassified	0	0	6.58E-06	0	0	3.28576E-07	1.19758E-06	0	1.2309E-05	2.16268E-06	0	0
HEXITOLDEGSUPER-PWY: superpathway of hexitol degradation (bacteria)|unclassified	0	0	9.79458E-06	0	0	9.96421E-06	0	5.62679E-06	1.17508E-05	0	0	3.41295E-06
HISDEG-PWY: L-histidine degradation I|g__Alistipes.s__Alistipes_shahii	0.003178	0	0	2.65156E-06	0	9.20988E-06	0	1.8616E-05	7.00862E-06	1.59149E-05	0	0
HISDEG-PWY: L-histidine degradation I|g__Clostridium.s__Clostridium_symbiosum	0	0	0	0	0	0	0	5.63253E-08	0	0	2.80775E-06	0
HISDEG-PWY: L-histidine degradation I|g__Enterobacter.s__Enterobacter_cloacae	0	0	1.31472E-07	0	0	0	0	4.01043E-07	0	0	0	0
HISDEG-PWY: L-histidine degradation I|g__Klebsiella.s__Klebsiella_pneumoniae	0	0	0	0	0	3.73016E-07	0	1.89237E-06	0	0	0	0
HISDEG-PWY: L-histidine degradation I|g__Lachnospiraceae_noname.s__Lachnospiraceae_bacterium_6_1_63FAA	0	0	0	2.21151E-07	0	0	0	0	0	0	0	0
HISDEG-PWY: L-histidine degradation I|g__Streptococcus.s__Streptococcus_australis	0	4.21558E-07	0	0	0	0	0	2.70116E-07	0	0	0	2.57126E-07
HISDEG-PWY: L-histidine degradation I|g__Streptococcus.s__Streptococcus_gordonii	0	0	0	0	0	1.37261E-07	0	0	0	0	0	8.13592E-08
HISDEG-PWY: L-histidine degradation I|g__Streptococcus.s__Streptococcus_parasanguinis	0	0	0	0	4.39004E-07	3.39362E-06	0	2.34714E-06	0	6.72691E-08	1.62689E-07	1.82121E-06
HISDEG-PWY: L-histidine degradation I|g__Streptococcus.s__Streptococcus_sanguinis	0	1.08341E-07	0	0	0	1.3434E-07	0	0	0	2.51092E-07	0	0
HISDEG-PWY: L-histidine degradation I|unclassified	1.48225E-06	1.4152E-06	1.76692E-06	6.53225E-06	6.44567E-06	2.94671E-05	7.79352E-06	3.48542E-05	3.0133E-05	2.86442E-05	9.23376E-06	1.26813E-05
HISTSYN-PWY: L-histidine biosynthesis|g__Anaerostipes.s__Anaerostipes_hadrus	4.80007E-06	2.20797E-06	8.75846E-06	6.61029E-06	0	2.38982E-07	1.98256E-06	5.11689E-07	0	1.05595E-06	0	3.30339E-06
HISTSYN-PWY: L-histidine biosynthesis|g__Bacteroides.s__Bacteroides_faecis	0	0	1.55922E-05	0	0	0	0	0	4.32635E-06	9.39017E-06	0	0
HISTSYN-PWY: L-histidine biosynthesis|g__Bacteroides.s__Bacteroides_thetaiotaomicron	3.43722E-06	0	1.85216E-06	0	0	1.52279E-05	1.47507E-06	1.96905E-06	0	0	5.27344E-06	9.15132E-06
HISTSYN-PWY: L-histidine biosynthesis|g__Bifidobacterium.s__Bifidobacterium_adolescentis	0	0	0	0	0	1.96311E-07	0	0	4.74816E-06	7.6331E-07	0	0
HISTSYN-PWY: L-histidine biosynthesis|g__Bifidobacterium.s__Bifidobacterium_bifidum	0	0	0	0	0	1.43946E-06	0	0	0	0	0	8.76851E-07
HISTSYN-PWY: L-histidine biosynthesis|g__Bifidobacterium.s__Bifidobacterium_longum	4.65651E-07	0	2.39992E-05	0	0	1.10639E-06	0	0	1.60811E-07	2.67749E-07	0	2.35591E-07
HISTSYN-PWY: L-histidine biosynthesis|g__Bifidobacterium.s__Bifidobacterium_pseudocatenulatum	0	0	1.66092E-05	0	0	0	0	0	0	0	0	0
HISTSYN-PWY: L-histidine biosynthesis|g__Burkholderiales_noname.s__Burkholderiales_bacterium_1_1_47	0	0	0	0	0	0	2.51441E-06	0	0	0	0	0
HISTSYN-PWY: L-histidine biosynthesis|g__Escherichia.s__Escherichia_coli	0	6.60773E-07	1.08534E-06	4.40769E-07	3.89836E-07	1.27936E-05	0	4.97622E-06	0	0	6.34424E-07	9.7076E-07
HISTSYN-PWY: L-histidine biosynthesis|g__Eubacterium.s__Eubacterium_siraeum	0	0	3.98904E-06	0	2.17378E-06	2.74823E-05	0	0	1.77664E-05	0	0	2.31012E-07
HISTSYN-PWY: L-histidine biosynthesis|g__Flavonifractor.s__Flavonifractor_plautii	0	2.85033E-07	0	0	0	0	0	0	0	0	1.69846E-07	0
HISTSYN-PWY: L-histidine biosynthesis|g__Klebsiella.s__Klebsiella_pneumoniae	0	0	0	0	0	2.54318E-07	0	1.54693E-06	0	0	0	0
HISTSYN-PWY: L-histidine biosynthesis|g__Lachnospiraceae_noname.s__Lachnospiraceae_bacterium_5_1_63FAA	3.53045E-06	0	8.08769E-06	8.7434E-06	0	3.4032E-07	1.99164E-06	0	0	2.06279E-06	0	3.56183E-06
HISTSYN-PWY: L-histidine biosynthesis|g__Lachnospiraceae_noname.s__Lachnospiraceae_bacterium_7_1_58FAA	0	4.72482E-07	2.84568E-07	0	1.03261E-06	0	0	0	0	0	1.73318E-07	0
HISTSYN-PWY: L-histidine biosynthesis|g__Lactococcus.s__Lactococcus_lactis	0	0	0	1.81507E-07	0	0	0	0	0	0	0	6.11768E-07
HISTSYN-PWY: L-histidine biosynthesis|g__Methanobrevibacter.s__Methanobrevibacter_smithii	0	0	0	0	0	1.98091E-06	0	0	0	2.09756E-06	0	0
HISTSYN-PWY: L-histidine biosynthesis|g__Parasutterella.s__Parasutterella_excrementihominis	0	0	0	0	0	0	1.95112E-06	0	0	0	0	0
HISTSYN-PWY: L-histidine biosynthesis|g__Ruminococcus.s__Ruminococcus_bromii	2.08978E-05	6.82552E-05	0	4.93374E-05	1.8207E-05	0	1.7815E-05	2.46143E-06	1.65941E-05	7.96896E-06	0	0
HISTSYN-PWY: L-histidine biosynthesis|g__Streptococcus.s__Streptococcus_salivarius	0	0	0	0	0	2.79991E-06	0	4.78881E-06	0	1.56307E-06	0	2.78222E-06
HISTSYN-PWY: L-histidine biosynthesis|g__Streptococcus.s__Streptococcus_sanguinis	0	0	0	0	0	4.02935E-07	0	0	0	0	0	0
HISTSYN-PWY: L-histidine biosynthesis|g__Streptococcus.s__Streptococcus_thermophilus	1.29985E-06	0	0	2.04602E-06	3.37796E-06	3.28216E-07	0	0	0	0	3.30731E-06	7.32318E-07
HISTSYN-PWY: L-histidine biosynthesis|g__Veillonella.s__Veillonella_atypica	0	0	0	0	0	1.4115E-06	0	0	0	1.70139E-07	0	0
HISTSYN-PWY: L-histidine biosynthesis|g__Veillonella.s__Veillonella_dispar	0	0	0	0	0	4.8012E-07	0	0	0	1.97673E-07	0	0
HISTSYN-PWY: L-histidine biosynthesis|g__Veillonella.s__Veillonella_parvula	0	0	0	0	0	2.34032E-06	0	0	0	0	0	0
HISTSYN-PWY: L-histidine biosynthesis|unclassified	3.40481E-05	1.26897E-05	4.83619E-05	6.07719E-05	0.000104984	5.84263E-05	6.76424E-05	5.25598E-05	4.22344E-05	5.79221E-05	3.20255E-05	5.86637E-05
HOMOSER-METSYN-PWY: L-methionine biosynthesis I|g__Anaerostipes.s__Anaerostipes_hadrus	5.83661E-06	2.96187E-06	1.02399E-05	1.08766E-05	0	3.58821E-07	2.11702E-06	1.34884E-07	0	2.93746E-06	0	4.22156E-06
HOMOSER-METSYN-PWY: L-methionine biosynthesis I|g__Blautia.s__Ruminococcus_torques	2.2361E-05	2.21031E-05	4.70885E-06	3.05156E-06	2.17674E-05	1.69492E-05	4.74299E-06	1.26337E-05	6.16801E-07	1.48773E-06	0	0
HOMOSER-METSYN-PWY: L-methionine biosynthesis I|g__Coprococcus.s__Coprococcus_catus	0	0	0	1.60083E-06	3.50312E-07	3.23947E-07	0	0	0	0	0	0
HOMOSER-METSYN-PWY: L-methionine biosynthesis I|g__Enterobacter.s__Enterobacter_cloacae	0	0	5.42122E-07	0	0	1.24129E-07	0	5.85106E-07	0	0	0	0
HOMOSER-METSYN-PWY: L-methionine biosynthesis I|g__Escherichia.s__Escherichia_coli	0	0	2.39572E-06	3.84609E-07	8.38695E-07	1.46153E-05	0	4.27668E-06	0	0	5.85547E-08	0.0001554
HOMOSER-METSYN-PWY: L-methionine biosynthesis I|g__Klebsiella.s__Klebsiella_pneumoniae	0	0	0	0	0	2.96144E-07	0	2.35113E-06	0	0	0	0
HOMOSER-METSYN-PWY: L-methionine biosynthesis I|g__Lachnospiraceae_noname.s__Lachnospiraceae_bacterium_5_1_63FAA	4.89917E-06	0	1.26961E-05	1.06962E-05	0	4.13371E-07	3.18643E-06	4.62576E-07	0	2.16809E-06	0	5.93889E-06
HOMOSER-METSYN-PWY: L-methionine biosynthesis I|g__Lactococcus.s__Lactococcus_lactis	0	0	0	4.93634E-07	0	0	0	0	8.71064E-08	0	0	1.07924E-06
HOMOSER-METSYN-PWY: L-methionine biosynthesis I|g__Ruminococcus.s__Ruminococcus_bromii	2.68131E-05	0.000105676	0	4.92587E-05	3.03494E-05	0	2.57646E-05	2.41497E-06	2.56072E-05	1.04645E-05	0	0
HOMOSER-METSYN-PWY: L-methionine biosynthesis I|g__Streptococcus.s__Streptococcus_infantis	0	8.40739E-07	1.02467E-07	0	0	1.90221E-07	0	2.11706E-07	0	0	0	2.05232E-07
HOMOSER-METSYN-PWY: L-methionine biosynthesis I|g__Streptococcus.s__Streptococcus_mitis_oralis_pneumoniae	0	2.89557E-06	8.96417E-07	1.61878E-07	0	1.36346E-07	0	4.28509E-07	0	0	0	0
HOMOSER-METSYN-PWY: L-methionine biosynthesis I|g__Streptococcus.s__Streptococcus_sanguinis	0	1.11162E-07	0	0	0	1.03595E-07	0	9.36922E-08	0	4.41761E-08	1.22385E-07	0
HOMOSER-METSYN-PWY: L-methionine biosynthesis I|unclassified	2.28432E-05	3.62088E-06	4.89684E-05	3.36031E-05	1.97387E-05	3.18911E-05	3.61671E-05	1.30216E-05	2.07887E-05	2.17904E-05	7.55077E-06	2.60567E-05
HSERMETANA-PWY: L-methionine biosynthesis III|g__Methanobrevibacter.s__Methanobrevibacter_smithii	0	0	0	0	5.13224E-07	2.91589E-06	0	0	9.51854E-07	2.8067E-06	0	0
HSERMETANA-PWY: L-methionine biosynthesis III|unclassified	2.23978E-05	3.63751E-06	1.99931E-05	3.26668E-05	1.96206E-05	3.13835E-05	0.000113513	2.31244E-05	1.99815E-05	2.55544E-05	7.47486E-06	2.00881E-05
ILEUSYN-PWY: L-isoleucine biosynthesis I (from threonine)|g__Akkermansia.s__Akkermansia_muciniphila	8.94753E-06	2.34147E-06	0	6.08823E-07	0	6.48201E-07	1.26482E-06	7.28027E-05	9.62E-07	5.97989E-06	0	3.33575E-06
ILEUSYN-PWY: L-isoleucine biosynthesis I (from threonine)|g__Bifidobacterium.s__Bifidobacterium_longum	9.7328E-07	0	3.01635E-05	0	0	2.0786E-06	0	1.31638E-07	8.68144E-07	0	0	7.80372E-07
ILEUSYN-PWY: L-isoleucine biosynthesis I (from threonine)|g__Blautia.s__Ruminococcus_obeum	1.06583E-06	4.49877E-07	1.32464E-06	1.27267E-05	2.6282E-06	1.17863E-06	8.19851E-06	1.0677E-05	1.24687E-06	1.0899E-06	1.63581E-05	1.39385E-05
ILEUSYN-PWY: L-isoleucine biosynthesis I (from threonine)|g__Clostridium.s__Clostridium_leptum	1.7092E-06	0	2.28174E-06	0	0	0	0	1.78972E-07	0	0	0	0
ILEUSYN-PWY: L-isoleucine biosynthesis I (from threonine)|g__Coprococcus.s__Coprococcus_catus	1.19739E-06	3.06472E-06	0	3.38618E-06	3.88135E-06	8.74086E-07	1.77081E-06	1.35034E-06	1.59756E-06	1.64357E-06	0	0
ILEUSYN-PWY: L-isoleucine biosynthesis I (from threonine)|g__Coprococcus.s__Coprococcus_eutactus	0	0	0	0	1.04895E-05	0	0	4.08544E-06	0	0	0	0
ILEUSYN-PWY: L-isoleucine biosynthesis I (from threonine)|g__Desulfovibrio.s__Desulfovibrio_piger	1.25628E-05	0	0	0	0	0	0	0	0	0	0	0
ILEUSYN-PWY: L-isoleucine biosynthesis I (from threonine)|g__Enterobacter.s__Enterobacter_cloacae	0	0	0	0	0	1.80035E-07	0	6.01104E-07	0	0	0	0
ILEUSYN-PWY: L-isoleucine biosynthesis I (from threonine)|g__Escherichia.s__Escherichia_coli	0	0	0	6.26527E-07	1.71893E-06	2.58922E-05	0	6.79889E-06	0	1.38697E-07	0	0
ILEUSYN-PWY: L-isoleucine biosynthesis I (from threonine)|g__Eubacterium.s__Eubacterium_siraeum	0	0	5.78208E-06	0	3.35098E-06	3.38324E-05	0	0	2.0025E-05	4.69905E-07	0	9.40726E-07
ILEUSYN-PWY: L-isoleucine biosynthesis I (from threonine)|g__Faecalibacterium.s__Faecalibacterium_prausnitzii	0.0001143	3.37134E-06	9.52545E-05	3.43314E-05	0.000306479	4.72922E-05	6.12725E-05	2.96103E-05	6.68036E-05	3.59833E-05	5.60932E-06	3.89946E-05
ILEUSYN-PWY: L-isoleucine biosynthesis I (from threonine)|g__Fusobacterium.s__Fusobacterium_mortiferum	3.93388E-07	0	0	0	0	0	0	0	0	0	0	0
ILEUSYN-PWY: L-isoleucine biosynthesis I (from threonine)|g__Lactococcus.s__Lactococcus_lactis	0	0	0	2.24835E-07	0	0	0	0	0	0	0	5.60287E-07
ILEUSYN-PWY: L-isoleucine biosynthesis I (from threonine)|g__Megamonas.s__Megamonas_hypermegale	3.71113E-05	0	0	0	0	0	0	0	0	0	0	0
ILEUSYN-PWY: L-isoleucine biosynthesis I (from threonine)|g__Megamonas.s__Megamonas_rupellensis	3.18005E-05	0	0	0	0	0	0	0	0	0	0	0
ILEUSYN-PWY: L-isoleucine biosynthesis I (from threonine)|g__Methanobrevibacter.s__Methanobrevibacter_smithii	0	0	0	0	0	2.92375E-06	0	0	1.19654E-06	3.06914E-06	0	0
ILEUSYN-PWY: L-isoleucine biosynthesis I (from threonine)|g__Mitsuokella.s__Mitsuokella_multacida	0	0	0	0	0	2.74678E-06	0	0	0	0	0	0
ILEUSYN-PWY: L-isoleucine biosynthesis I (from threonine)|g__Odoribacter.s__Odoribacter_splanchnicus	3.26487E-06	0	4.46163E-06	0	0	3.98383E-06	1.54801E-06	1.41006E-06	2.40923E-06	6.62497E-06	0	0
ILEUSYN-PWY: L-isoleucine biosynthesis I (from threonine)|g__Streptococcus.s__Streptococcus_australis	0	4.21284E-07	0	0	1.49396E-07	0	0	4.43623E-07	0	0	0	6.69295E-07
ILEUSYN-PWY: L-isoleucine biosynthesis I (from threonine)|g__Streptococcus.s__Streptococcus_infantis	0	2.03356E-06	0	0	0	1.9484E-07	0	6.4299E-07	0	0	0	0
ILEUSYN-PWY: L-isoleucine biosynthesis I (from threonine)|g__Streptococcus.s__Streptococcus_mitis_oralis_pneumoniae	0	3.43767E-06	7.11981E-07	3.08757E-07	0	8.36281E-07	0	7.23363E-07	0	0	0	0
ILEUSYN-PWY: L-isoleucine biosynthesis I (from threonine)|g__Streptococcus.s__Streptococcus_parasanguinis	0	0	0	0	3.47328E-07	4.21243E-06	0	3.28422E-06	0	2.10652E-07	2.54737E-07	3.35221E-06
ILEUSYN-PWY: L-isoleucine biosynthesis I (from threonine)|g__Streptococcus.s__Streptococcus_sanguinis	0	0	0	0	0	0	0	0	0	0	1.28189E-07	0
ILEUSYN-PWY: L-isoleucine biosynthesis I (from threonine)|unclassified	0.000105735	5.67677E-05	0.000136432	0.00019761	0.000244508	0.000152284	0.000364845	0.000172614	0.000115903	0.000133796	9.89874E-05	0.000155183
KDO-NAGLIPASYN-PWY: superpathway of (Kdo)2-lipid A biosynthesis|g__Escherichia.s__Escherichia_coli	0	5.75207E-07	1.47147E-06	1.52592E-07	7.82878E-07	9.30038E-06	0	5.96976E-06	0	0	0	2.83327E-07
KDO-NAGLIPASYN-PWY: superpathway of (Kdo)2-lipid A biosynthesis|g__Shigella.s__Shigella_flexneri	0	0	0	0	0	0	0	0	0	0	0	3.71891E-07
KETOGLUCONMET-PWY: ketogluconate metabolism|g__Escherichia.s__Escherichia_coli	0	0	1.88752E-06	0	1.7358E-06	7.53855E-06	0	0	0	0	0	0
KETOGLUCONMET-PWY: ketogluconate metabolism|g__Shigella.s__Shigella_flexneri	0	0	0	0	0	0	0	0	0	0	0	2.0595E-07
LACTOSECAT-PWY: lactose and galactose degradation I|g__Enterococcus.s__Enterococcus_faecalis	0	0	0	4.04714E-06	0	1.24149E-06	0	9.99331E-08	0	0	0	0
LACTOSECAT-PWY: lactose and galactose degradation I|g__Enterococcus.s__Enterococcus_faecium	0	0	1.97383E-07	0	0	0	0	0	0	0	0	0
LACTOSECAT-PWY: lactose and galactose degradation I|g__Lactococcus.s__Lactococcus_lactis	0	3.7839E-07	0	7.8738E-07	3.48145E-07	0	2.23099E-07	0	4.30912E-07	0	0	4.56013E-07
LACTOSECAT-PWY: lactose and galactose degradation I|g__Streptococcus.s__Streptococcus_anginosus	0	0	0	0	0	0	0	1.26079E-07	0	0	0	0
LACTOSECAT-PWY: lactose and galactose degradation I|g__Streptococcus.s__Streptococcus_australis	0	5.12578E-07	2.30141E-07	0	0	0	0	6.84972E-07	0	0	2.56911E-07	7.42981E-07
LACTOSECAT-PWY: lactose and galactose degradation I|g__Streptococcus.s__Streptococcus_gordonii	0	0	0	0	0	1.08984E-07	0	0.0001558	0	7.00078E-07	0	0
LACTOSECAT-PWY: lactose and galactose degradation I|g__Streptococcus.s__Streptococcus_infantis	0	2.65122E-06	5.5932E-07	0	0	3.94683E-07	0	4.1838E-07	0	0	1.17359E-07	6.12647E-07
LACTOSECAT-PWY: lactose and galactose degradation I|g__Streptococcus.s__Streptococcus_lutetiensis	0	0	0	0	0	0	0	2.62076E-05	0	0	0	0
LACTOSECAT-PWY: lactose and galactose degradation I|g__Streptococcus.s__Streptococcus_mitis_oralis_pneumoniae	0	4.89433E-06	1.11806E-06	4.06207E-07	0	0.0007947	0	1.17754E-06	0	0	0	0
LACTOSECAT-PWY: lactose and galactose degradation I|g__Streptococcus.s__Streptococcus_mutans	0	0	0	0	0	4.97503E-07	0	8.30843E-07	0	1.56818E-07	0	1.75628E-07
LACTOSECAT-PWY: lactose and galactose degradation I|g__Streptococcus.s__Streptococcus_parasanguinis	0	0	0	0	4.18722E-07	3.96367E-06	0	2.69546E-06	0	2.73246E-07	4.96805E-07	3.92902E-06
LACTOSECAT-PWY: lactose and galactose degradation I|g__Streptococcus.s__Streptococcus_salivarius	0	0	0	0	7.8687E-08	6.41093E-07	0	0	0	1.57666E-07	0	0
LACTOSECAT-PWY: lactose and galactose degradation I|g__Streptococcus.s__Streptococcus_sanguinis	0	3.72784E-07	0	0	0	2.39342E-07	0	2.00657E-07	0	0	1.11804E-07	2.2611E-07
LACTOSECAT-PWY: lactose and galactose degradation I|unclassified	3.12627E-06	1.77459E-07	0	5.01486E-07	0	0	0	8.76382E-06	0	0	0	0
LPSSYN-PWY: superpathway of lipopolysaccharide biosynthesis|g__Escherichia.s__Escherichia_coli	0	3.73456E-07	0	1.77268E-07	8.3652E-07	6.1753E-07	0	1.27898E-06	0	0	0	2.23477E-07
MET-SAM-PWY: superpathway of S-adenosyl-L-methionine biosynthesis|g__Anaerostipes.s__Anaerostipes_hadrus	5.35109E-06	2.09335E-06	9.88471E-06	9.11374E-06	0	3.7185E-07	2.23598E-06	2.10691E-07	0	3.02555E-06	0	3.94649E-06
MET-SAM-PWY: superpathway of S-adenosyl-L-methionine biosynthesis|g__Blautia.s__Ruminococcus_torques	3.05466E-05	2.58022E-05	5.81097E-06	5.63375E-06	2.52053E-05	1.86006E-05	6.47696E-06	1.42494E-05	9.37113E-07	1.86576E-06	0	0
MET-SAM-PWY: superpathway of S-adenosyl-L-methionine biosynthesis|g__Enterobacter.s__Enterobacter_cloacae	0	0	5.85745E-07	0	0	0	0	7.02501E-07	0	0	0	0
MET-SAM-PWY: superpathway of S-adenosyl-L-methionine biosynthesis|g__Escherichia.s__Escherichia_coli	0	0	0	6.3602E-08	0	2.97076E-06	0	1.95309E-06	0	0	0	1.23535E-07
MET-SAM-PWY: superpathway of S-adenosyl-L-methionine biosynthesis|g__Klebsiella.s__Klebsiella_pneumoniae	0	0	0	0	0	2.86373E-07	0	2.71616E-06	0	0	0	0
MET-SAM-PWY: superpathway of S-adenosyl-L-methionine biosynthesis|g__Lachnospiraceae_noname.s__Lachnospiraceae_bacterium_5_1_63FAA	5.41232E-06	0	1.33089E-05	1.17535E-05	0	5.13332E-07	3.20127E-06	0.0002758	0	2.60134E-06	0	5.21451E-06
MET-SAM-PWY: superpathway of S-adenosyl-L-methionine biosynthesis|g__Lactococcus.s__Lactococcus_lactis	0	0	0	2.50636E-07	0	0	0	0	0	0	0	4.45947E-07
MET-SAM-PWY: superpathway of S-adenosyl-L-methionine biosynthesis|g__Streptococcus.s__Streptococcus_infantis	0	1.28023E-06	1.33355E-07	0	0	1.65088E-07	0	3.08533E-07	0	0	0	1.5538E-07
MET-SAM-PWY: superpathway of S-adenosyl-L-methionine biosynthesis|g__Streptococcus.s__Streptococcus_mitis_oralis_pneumoniae	0	3.23978E-06	9.46231E-07	0	0	1.73242E-07	0	5.04873E-07	0	0	0	0
MET-SAM-PWY: superpathway of S-adenosyl-L-methionine biosynthesis|g__Streptococcus.s__Streptococcus_sanguinis	0	0	0	0	0	7.37003E-08	0	1.06184E-07	0	0	0	0
MET-SAM-PWY: superpathway of S-adenosyl-L-methionine biosynthesis|unclassified	3.76954E-05	6.57801E-06	6.78599E-05	5.62523E-05	3.41489E-05	5.06103E-05	5.59474E-05	1.99185E-05	3.57183E-05	3.42262E-05	1.49017E-05	3.69604E-05
METHANOGENESIS-PWY: methanogenesis from H2 and CO2|g__Methanobrevibacter.s__Methanobrevibacter_smithii	0	0	0	0	5.2934E-07	3.06197E-06	0	0	9.79955E-07	2.19352E-06	0	0
METHGLYUT-PWY: superpathway of methylglyoxal degradation|g__Escherichia.s__Escherichia_coli	0	0	0	1.87077E-07	1.01006E-06	1.28982E-05	1.3256E-07	5.21709E-06	0	0	1.62558E-07	2.91065E-07
METSYN-PWY: L-homoserine and L-methionine biosynthesis|g__Anaerostipes.s__Anaerostipes_hadrus	5.5676E-06	2.29283E-06	1.00072E-05	9.50741E-06	0	3.95735E-07	2.32391E-06	2.01702E-07	0	3.07259E-06	0	4.01779E-06
METSYN-PWY: L-homoserine and L-methionine biosynthesis|g__Blautia.s__Ruminococcus_torques	2.93811E-05	2.50953E-05	5.69879E-06	5.1159E-06	2.49148E-05	1.84223E-05	6.17272E-06	1.40056E-05	8.60642E-07	1.96521E-06	0	0
METSYN-PWY: L-homoserine and L-methionine biosynthesis|g__Enterobacter.s__Enterobacter_cloacae	0	0	7.58918E-07	0	0	0	0	7.32065E-07	0	0	0	0
METSYN-PWY: L-homoserine and L-methionine biosynthesis|g__Escherichia.s__Escherichia_coli	0	0	0	7.70974E-08	0	3.66097E-06	0	2.23482E-06	0	0	0	1.20608E-07
METSYN-PWY: L-homoserine and L-methionine biosynthesis|g__Klebsiella.s__Klebsiella_pneumoniae	0	0	0	0	0	3.49479E-07	0	2.99614E-06	0	0	0	0
METSYN-PWY: L-homoserine and L-methionine biosynthesis|g__Lachnospiraceae_noname.s__Lachnospiraceae_bacterium_5_1_63FAA	5.32891E-06	0	1.27636E-05	1.10997E-05	0	0.0004798	3.10416E-06	3.50467E-07	0	2.51451E-06	0	5.1937E-06
METSYN-PWY: L-homoserine and L-methionine biosynthesis|g__Lactococcus.s__Lactococcus_lactis	0	0	0	2.79427E-07	0	0	0	0	0	0	0	5.00264E-07
METSYN-PWY: L-homoserine and L-methionine biosynthesis|g__Streptococcus.s__Streptococcus_infantis	0	1.1795E-06	1.18973E-07	0	0	1.65822E-07	0	2.8553E-07	0	0	0	1.64923E-07
METSYN-PWY: L-homoserine and L-methionine biosynthesis|g__Streptococcus.s__Streptococcus_mitis_oralis_pneumoniae	0	3.43093E-06	9.38382E-07	0	0	2.0259E-07	0	5.27079E-07	0	0	0	0
METSYN-PWY: L-homoserine and L-methionine biosynthesis|g__Streptococcus.s__Streptococcus_sanguinis	0	0	0	0	0	7.47004E-08	0	1.04727E-07	0	0	0	0
METSYN-PWY: L-homoserine and L-methionine biosynthesis|unclassified	3.73092E-05	6.81046E-06	6.53336E-05	5.61341E-05	3.60368E-05	5.26705E-05	6.52535E-05	2.44074E-05	3.61273E-05	3.9049E-05	1.39182E-05	4.21452E-05
NAD-BIOSYNTHESIS-II: NAD salvage pathway II|g__Enterobacter.s__Enterobacter_cloacae	0	0	2.74158E-07	0	0	5.71752E-08	0	6.29721E-07	0	0	0	0
NAD-BIOSYNTHESIS-II: NAD salvage pathway II|g__Escherichia.s__Escherichia_coli	0	5.78E-07	3.12034E-06	8.21188E-07	1.34522E-06	1.93324E-05	2.2093E-07	9.45741E-06	2.01927E-07	1.75728E-07	6.06588E-07	9.75655E-07
NAD-BIOSYNTHESIS-II: NAD salvage pathway II|g__Klebsiella.s__Klebsiella_pneumoniae	0	0	0	0	0	3.30306E-07	0	2.56176E-06	0	0	0	0
NAD-BIOSYNTHESIS-II: NAD salvage pathway II|g__Shigella.s__Shigella_flexneri	0	0	0	0	0	0	0	0	0	0	0	2.96777E-07
NAD-BIOSYNTHESIS-II: NAD salvage pathway II|g__Streptococcus.s__Streptococcus_infantis	0	2.48973E-06	1.29022E-07	0	0	0	0	1.75186E-07	0	0	0	1.81353E-07
NAD-BIOSYNTHESIS-II: NAD salvage pathway II|g__Streptococcus.s__Streptococcus_mitis_oralis_pneumoniae	0	0.0009871	0	0	0	0	0	0	0	0	0	0
NAD-BIOSYNTHESIS-II: NAD salvage pathway II|unclassified	0	0	0	0	0	0	0	4.60093E-06	0	0	0	0
NAGLIPASYN-PWY: lipid IVA biosynthesis|g__Burkholderiales_noname.s__Burkholderiales_bacterium_1_1_47	0	0	0	0	0	0	2.05315E-06	0	0	0	0	0
NAGLIPASYN-PWY: lipid IVA biosynthesis|g__Escherichia.s__Escherichia_coli	0	5.92569E-07	1.87242E-06	2.56563E-07	8.40495E-07	5.90028E-06	1.4514E-07	5.37306E-06	0	0	1.00752E-07	2.22145E-07
NAGLIPASYN-PWY: lipid IVA biosynthesis|g__Haemophilus.s__Haemophilus_parainfluenzae	0	0	1.29693E-07	0	0	4.76283E-07	0	0	0	4.40816E-07	0	0
NAGLIPASYN-PWY: lipid IVA biosynthesis|g__Klebsiella.s__Klebsiella_pneumoniae	0	0	0	0	0	2.41136E-07	0	2.1389E-06	0	0	0	0
NAGLIPASYN-PWY: lipid IVA biosynthesis|g__Parasutterella.s__Parasutterella_excrementihominis	0	0	0	0	0	0	1.98537E-06	0	0	0	0	0
NAGLIPASYN-PWY: lipid IVA biosynthesis|g__Shigella.s__Shigella_flexneri	0	0	0	0	0	0	0	0	0	0	0	3.46954E-07
NAGLIPASYN-PWY: lipid IVA biosynthesis|g__Sutterella.s__Sutterella_wadsworthensis	3.22647E-06	0	0	0	0	3.74003E-06	0	7.28884E-06	0	0	0	0
NAGLIPASYN-PWY: lipid IVA biosynthesis|unclassified	0	0	7.63195E-06	0	0	0	0	0	1.86996E-05	0	0	0
NONMEVIPP-PWY: methylerythritol phosphate pathway I|g__Adlercreutzia.s__Adlercreutzia_equolifaciens	0	0	0	2.06997E-07	0	0	1.15243E-06	1.42223E-06	4.51048E-07	4.7937E-07	0	0
NONMEVIPP-PWY: methylerythritol phosphate pathway I|g__Akkermansia.s__Akkermansia_muciniphila	7.67518E-06	1.75568E-06	0	3.74757E-07	0	0	0	6.1317E-05	8.69915E-07	3.83807E-06	0	1.4704E-06
NONMEVIPP-PWY: methylerythritol phosphate pathway I|g__Alistipes.s__Alistipes_finegoldii	4.6076E-06	0	0	5.62043E-06	0	0	1.07296E-06	2.77889E-06	0	3.64173E-06	0	0
NONMEVIPP-PWY: methylerythritol phosphate pathway I|g__Alistipes.s__Alistipes_indistinctus	1.96423E-06	0	0	0	0	0	0	2.33376E-06	0	0	0	0
NONMEVIPP-PWY: methylerythritol phosphate pathway I|g__Alistipes.s__Alistipes_putredinis	3.11077E-05	0	0	3.99886E-05	3.47549E-05	1.06185E-06	1.97835E-05	1.00695E-05	5.7036E-06	1.73098E-05	7.0364E-06	8.48877E-06
NONMEVIPP-PWY: methylerythritol phosphate pathway I|g__Anaerostipes.s__Anaerostipes_hadrus	4.64742E-06	1.99588E-06	6.76571E-06	8.18437E-06	0	3.33963E-07	1.78986E-06	1.24124E-07	0	1.64606E-06	0	3.59838E-06
NONMEVIPP-PWY: methylerythritol phosphate pathway I|g__Anaerotruncus.s__Anaerotruncus_colihominis	0	0	0	0	0	0	2.95115E-07	0	0	0	0	0
NONMEVIPP-PWY: methylerythritol phosphate pathway I|g__Bacteroides.s__Bacteroides_eggerthii	1.33076E-06	0	0	0	0	0	0	0	2.29524E-05	1.06252E-05	0	0
NONMEVIPP-PWY: methylerythritol phosphate pathway I|g__Bacteroides.s__Bacteroides_ovatus	3.23791E-06	0	1.18376E-05	1.4388E-06	0	0	4.47831E-06	4.04305E-06	5.4407E-06	4.98414E-06	4.81842E-05	1.80887E-05
NONMEVIPP-PWY: methylerythritol phosphate pathway I|g__Bacteroides.s__Bacteroides_sp_2_1_22	0	0	0	0	0	0	0	0	3.56331E-07	7.27313E-07	0	0
NONMEVIPP-PWY: methylerythritol phosphate pathway I|g__Bacteroides.s__Bacteroides_vulgatus	2.59747E-05	8.60036E-05	3.87638E-05	1.12448E-06	0	2.45769E-05	4.5111E-07	0	3.00549E-05	3.83545E-05	0.000108055	7.01212E-05
NONMEVIPP-PWY: methylerythritol phosphate pathway I|g__Bacteroides.s__Bacteroides_xylanisolvens	0	0	1.14291E-05	4.7625E-07	0	4.43797E-06	1.12326E-05	1.7075E-06	0	1.1334E-06	0	0
NONMEVIPP-PWY: methylerythritol phosphate pathway I|g__Bifidobacterium.s__Bifidobacterium_adolescentis	0	0	0	0	0	2.35904E-07	0	1.6815E-07	6.32867E-06	8.14719E-07	0	0
NONMEVIPP-PWY: methylerythritol phosphate pathway I|g__Bifidobacterium.s__Bifidobacterium_longum	5.32505E-07	0	1.51665E-06	0	0	2.25393E-07	0	0	0	0	0	0
NONMEVIPP-PWY: methylerythritol phosphate pathway I|g__Blautia.s__Ruminococcus_gnavus	3.60514E-07	1.81775E-06	9.3397E-07	6.50136E-07	0	0	0	0	0	0	1.05485E-05	8.73486E-07
NONMEVIPP-PWY: methylerythritol phosphate pathway I|g__Blautia.s__Ruminococcus_obeum	6.35846E-07	0	7.39747E-07	1.45534E-05	1.24985E-06	9.52759E-07	6.01823E-06	9.04172E-06	7.65647E-07	1.08065E-06	1.71891E-05	1.38953E-05
NONMEVIPP-PWY: methylerythritol phosphate pathway I|g__Blautia.s__Ruminococcus_torques	2.77893E-05	1.81049E-05	3.69482E-06	1.27173E-05	0	0	2.67491E-06	3.0716E-06	1.15123E-06	0	6.46126E-06	0
NONMEVIPP-PWY: methylerythritol phosphate pathway I|g__Burkholderiales_noname.s__Burkholderiales_bacterium_1_1_47	0	0	0	0	0	0	2.28388E-06	0	0	0	0	0
NONMEVIPP-PWY: methylerythritol phosphate pathway I|g__Catenibacterium.s__Catenibacterium_mitsuokai	0	0	0	0	0	0	0	1.73539E-06	3.06396E-06	2.3004E-06	0	0
NONMEVIPP-PWY: methylerythritol phosphate pathway I|g__Clostridium.s__Clostridium_asparagiforme	0	3.11335E-07	0	0	0	0	0	0	0	0	0	0
NONMEVIPP-PWY: methylerythritol phosphate pathway I|g__Clostridium.s__Clostridium_nexile	0	0	0	0	0	0	0	0	0	0	6.18436E-06	0
NONMEVIPP-PWY: methylerythritol phosphate pathway I|g__Clostridium.s__Clostridium_perfringens	0	0	0	0	0	0	0	2.5422E-07	0	0	0	0
NONMEVIPP-PWY: methylerythritol phosphate pathway I|g__Coprobacter.s__Coprobacter_fastidiosus	2.78636E-06	4.87798E-06	0	0	0	2.71982E-06	0	0	4.07521E-07	1.85711E-06	0	0
NONMEVIPP-PWY: methylerythritol phosphate pathway I|g__Dorea.s__Dorea_formicigenerans	5.62413E-06	2.81125E-06	2.11324E-06	6.29143E-06	2.49824E-06	2.14308E-06	7.51313E-07	9.41242E-07	2.53404E-07	6.23737E-07	1.80585E-06	1.12273E-06
NONMEVIPP-PWY: methylerythritol phosphate pathway I|g__Dorea.s__Dorea_longicatena	1.9466E-05	0	6.70043E-06	1.62986E-05	9.45392E-07	2.3774E-06	3.82982E-06	4.3806E-06	3.50416E-06	2.09782E-06	0	4.46915E-06
NONMEVIPP-PWY: methylerythritol phosphate pathway I|g__Eggerthella.s__Eggerthella_lenta	2.76114E-07	0	0	0	0	0	0	0	0	0	0	0
NONMEVIPP-PWY: methylerythritol phosphate pathway I|g__Erysipelotrichaceae_noname.s__Clostridium_ramosum	0	3.73391E-07	4.72193E-07	0	0	0	0	0	0	0	2.03339E-07	0
NONMEVIPP-PWY: methylerythritol phosphate pathway I|g__Erysipelotrichaceae_noname.s__Clostridium_spiroforme	0	0	0	0	2.10383E-06	0	0	0	0	0	0	0
NONMEVIPP-PWY: methylerythritol phosphate pathway I|g__Erysipelotrichaceae_noname.s__Erysipelotrichaceae_bacterium_21_3	0	0	0	0	0	0	0	0	0	0	0	1.56073E-07
NONMEVIPP-PWY: methylerythritol phosphate pathway I|g__Erysipelotrichaceae_noname.s__Erysipelotrichaceae_bacterium_2_2_44A	0	0	0	0	0	0	0	0	0	0	1.43684E-07	0
NONMEVIPP-PWY: methylerythritol phosphate pathway I|g__Erysipelotrichaceae_noname.s__Erysipelotrichaceae_bacterium_6_1_45	0	0	0	0	0	0	0	0	0	0	1.69712E-07	0
NONMEVIPP-PWY: methylerythritol phosphate pathway I|g__Eubacterium.s__Eubacterium_eligens	0	0	0	0	0	3.84064E-07	0	0	0	0	0	0
NONMEVIPP-PWY: methylerythritol phosphate pathway I|g__Eubacterium.s__Eubacterium_ramulus	1.99929E-06	3.03943E-07	0	4.07429E-06	5.99009E-06	1.05197E-06	0	0	0	0	0	0
NONMEVIPP-PWY: methylerythritol phosphate pathway I|g__Eubacterium.s__Eubacterium_rectale	1.05861E-05	0.000136467	0	9.56349E-05	0	7.44633E-06	3.58298E-05	2.1333E-06	1.90515E-05	2.61182E-06	0	2.21748E-06
NONMEVIPP-PWY: methylerythritol phosphate pathway I|g__Eubacterium.s__Eubacterium_sp_3_1_31	0	0	1.41893E-06	3.1594E-06	0	0	0	0	0	0	0	0
NONMEVIPP-PWY: methylerythritol phosphate pathway I|g__Flavonifractor.s__Flavonifractor_plautii	0	0	2.49385E-07	0	0	0	0	0	0	0	0	0
NONMEVIPP-PWY: methylerythritol phosphate pathway I|g__Holdemania.s__Holdemania_filiformis	2.08169E-07	0	0	0	0	0	0	0	0	0	0	0
NONMEVIPP-PWY: methylerythritol phosphate pathway I|g__Klebsiella.s__Klebsiella_pneumoniae	0	0	0	0	0	3.15613E-07	0	1.55785E-06	0	0	0	0
NONMEVIPP-PWY: methylerythritol phosphate pathway I|g__Lachnospiraceae_noname.s__Lachnospiraceae_bacterium_1_1_57FAA	0	0	1.23276E-06	0	0	0	0	0	0	0	0	0
NONMEVIPP-PWY: methylerythritol phosphate pathway I|g__Lachnospiraceae_noname.s__Lachnospiraceae_bacterium_2_1_58FAA	5.02372E-07	1.99777E-06	1.09787E-06	3.83498E-07	0	0	0	0	0	0	1.19574E-05	0
NONMEVIPP-PWY: methylerythritol phosphate pathway I|g__Lachnospiraceae_noname.s__Lachnospiraceae_bacterium_3_1_46FAA	0	0	1.6234E-06	1.10485E-05	0	0	9.00248E-07	3.5281E-07	9.17675E-07	0	0	0
NONMEVIPP-PWY: methylerythritol phosphate pathway I|g__Lachnospiraceae_noname.s__Lachnospiraceae_bacterium_5_1_57FAA	0	0	0	0	0	0	0	0	0	0	0	6.75889E-07
NONMEVIPP-PWY: methylerythritol phosphate pathway I|g__Lachnospiraceae_noname.s__Lachnospiraceae_bacterium_7_1_58FAA	0	7.86397E-07	4.75015E-07	0	5.39946E-07	0	0	0	0	0	3.26698E-07	2.41563E-07
NONMEVIPP-PWY: methylerythritol phosphate pathway I|g__Lachnospiraceae_noname.s__Lachnospiraceae_bacterium_9_1_43BFAA	0	0	0	0	0	0	0	0	0	0	1.78368E-07	0
NONMEVIPP-PWY: methylerythritol phosphate pathway I|g__Mitsuokella.s__Mitsuokella_multacida	0	0	0	0	0	3.15656E-07	0	0	0	0	0	0
NONMEVIPP-PWY: methylerythritol phosphate pathway I|g__Odoribacter.s__Odoribacter_splanchnicus	3.39645E-06	0	4.16812E-06	0	0	3.82245E-06	1.3274E-06	1.0356E-06	2.17015E-06	5.62275E-06	0	0
NONMEVIPP-PWY: methylerythritol phosphate pathway I|g__Parasutterella.s__Parasutterella_excrementihominis	0	0	0	0	0	0	2.35647E-06	0	0	0	0	0
NONMEVIPP-PWY: methylerythritol phosphate pathway I|g__Peptostreptococcaceae_noname.s__Clostridium_bartlettii	0	0	3.00537E-07	0	0	0	0	0	0	0	0	0
NONMEVIPP-PWY: methylerythritol phosphate pathway I|g__Phascolarctobacterium.s__Phascolarctobacterium_succinatutens	1.30539E-05	0	0	0	0	0	0	6.62383E-06	0	0	0	0
NONMEVIPP-PWY: methylerythritol phosphate pathway I|g__Roseburia.s__Roseburia_hominis	2.18608E-06	0	2.31531E-06	3.71287E-07	0	1.06013E-06	1.61523E-06	3.9682E-07	0	0	0	0
NONMEVIPP-PWY: methylerythritol phosphate pathway I|g__Roseburia.s__Roseburia_intestinalis	7.05472E-06	3.11765E-06	0	1.23698E-05	6.47835E-05	6.03222E-07	2.22128E-05	1.00186E-06	3.44737E-06	0	0	0
NONMEVIPP-PWY: methylerythritol phosphate pathway I|g__Ruminococcus.s__Ruminococcus_lactaris	0	0	0	0	0	0	0	3.26562E-06	0	1.32905E-06	0	0
NONMEVIPP-PWY: methylerythritol phosphate pathway I|g__Ruminococcus.s__Ruminococcus_sp_5_1_39BFAA	1.51076E-05	0	2.02086E-05	2.38493E-05	2.30386E-05	8.98226E-06	1.60526E-05	8.16613E-06	7.47843E-06	4.07183E-06	2.20663E-05	2.33553E-05
NONMEVIPP-PWY: methylerythritol phosphate pathway I|g__Shigella.s__Shigella_flexneri	0	0	0	0	0	0	0	0	0	0	0	5.86959E-08
NONMEVIPP-PWY: methylerythritol phosphate pathway I|unclassified	0.000117612	7.78019E-05	0.000102098	0.000208717	0.000238259	0.000153874	0.000407781	0.000211341	0.000153938	0.000195279	9.03507E-05	0.000141009
NONOXIPENT-PWY: pentose phosphate pathway (non-oxidative branch)|g__Alistipes.s__Alistipes_indistinctus	2.0292E-06	0	0	0	0	0	0	2.0072E-06	0	3.01942E-07	0	0
NONOXIPENT-PWY: pentose phosphate pathway (non-oxidative branch)|g__Alistipes.s__Alistipes_shahii	3.13212E-06	0	0	2.49297E-06	0	1.08415E-05	0	2.12017E-05	6.9511E-06	1.74658E-05	0	0
NONOXIPENT-PWY: pentose phosphate pathway (non-oxidative branch)|g__Anaerostipes.s__Anaerostipes_hadrus	6.33131E-06	4.92853E-06	2.10658E-05	3.03893E-05	0	8.4349E-07	3.89103E-06	7.10365E-07	0	2.93758E-06	0	6.93633E-06
NONOXIPENT-PWY: pentose phosphate pathway (non-oxidative branch)|g__Bacteroides.s__Bacteroides_massiliensis	3.38217E-07	0	0	0	0	0	0	0	0	0	0	0
NONOXIPENT-PWY: pentose phosphate pathway (non-oxidative branch)|g__Bacteroides.s__Bacteroides_thetaiotaomicron	3.09023E-06	0	2.0127E-06	0	0	0.01401	1.28427E-06	2.8083E-06	0	0	4.88578E-06	7.55688E-06
NONOXIPENT-PWY: pentose phosphate pathway (non-oxidative branch)|g__Bacteroides.s__Bacteroides_xylanisolvens	0	0	1.74354E-05	8.87886E-07	0	5.51012E-06	1.42152E-05	3.23385E-06	0	1.76091E-06	0	0
NONOXIPENT-PWY: pentose phosphate pathway (non-oxidative branch)|g__Blautia.s__Ruminococcus_gnavus	2.27694E-07	6.36528E-07	2.47711E-06	5.17222E-07	0	0	1.67125E-07	0	0	0	1.58058E-05	9.94578E-07
NONOXIPENT-PWY: pentose phosphate pathway (non-oxidative branch)|g__Blautia.s__Ruminococcus_obeum	5.55457E-07	5.90006E-07	1.26036E-06	1.55207E-05	2.18003E-06	1.15788E-06	6.26151E-06	1.13493E-05	1.22277E-06	1.06745E-06	1.98996E-05	1.95986E-05
NONOXIPENT-PWY: pentose phosphate pathway (non-oxidative branch)|g__Blautia.s__Ruminococcus_torques	4.2234E-05	3.09883E-05	0.009617	4.74162E-06	4.39204E-05	3.26132E-05	1.13561E-05	2.31734E-05	2.03733E-06	2.30142E-06	9.16062E-07	0
NONOXIPENT-PWY: pentose phosphate pathway (non-oxidative branch)|g__Clostridium.s__Clostridium_bolteae	1.27843E-07	3.61772E-08	0	2.83075E-07	0	0	9.49151E-08	2.04432E-07	0	0	5.53006E-07	2.49962E-07
NONOXIPENT-PWY: pentose phosphate pathway (non-oxidative branch)|g__Coprococcus.s__Coprococcus_catus	1.32547E-06	8.85035E-07	0	2.16733E-06	2.0825E-06	6.49962E-07	9.09511E-07	1.82206E-06	7.48334E-07	1.63018E-06	0	0
NONOXIPENT-PWY: pentose phosphate pathway (non-oxidative branch)|g__Desulfovibrio.s__Desulfovibrio_piger	8.89659E-06	0	0	0	0	0	0	0	0	0	0	0
NONOXIPENT-PWY: pentose phosphate pathway (non-oxidative branch)|g__Enterobacter.s__Enterobacter_cloacae	0	0	1.55426E-06	0	0	3.0567E-07	0	7.03711E-07	0	0	0	0
NONOXIPENT-PWY: pentose phosphate pathway (non-oxidative branch)|g__Erysipelotrichaceae_noname.s__Clostridium_spiroforme	0	0	0	0	3.02242E-06	0	0	0	0	0	0	0
NONOXIPENT-PWY: pentose phosphate pathway (non-oxidative branch)|g__Escherichia.s__Escherichia_coli	0	0	8.46325E-08	0	0	3.92068E-07	0	9.1728E-06	0	0	0	0
NONOXIPENT-PWY: pentose phosphate pathway (non-oxidative branch)|g__Eubacterium.s__Eubacterium_eligens	0	0	1.18075E-05	0	0	1.64539E-05	1.54096E-05	2.84252E-06	6.92009E-07	3.56173E-06	0	7.16688E-06
NONOXIPENT-PWY: pentose phosphate pathway (non-oxidative branch)|g__Eubacterium.s__Eubacterium_siraeum	0	0	1.22196E-05	0	3.42422E-06	4.18734E-05	0	0	2.30054E-05	1.02178E-06	0	0
NONOXIPENT-PWY: pentose phosphate pathway (non-oxidative branch)|g__Faecalibacterium.s__Faecalibacterium_prausnitzii	7.73977E-05	0	5.85405E-05	2.1266E-06	0.000163995	1.35471E-05	3.38309E-05	1.12103E-05	4.03628E-05	2.37418E-05	0	2.6808E-05
NONOXIPENT-PWY: pentose phosphate pathway (non-oxidative branch)|g__Klebsiella.s__Klebsiella_pneumoniae	0	0	0	0	0	8.84034E-07	0	3.3302E-06	0	0	0	0
NONOXIPENT-PWY: pentose phosphate pathway (non-oxidative branch)|g__Lachnospiraceae_noname.s__Lachnospiraceae_bacterium_2_1_58FAA	6.61602E-07	3.24841E-06	1.24144E-06	8.19324E-07	0	0	0	0	0	0	1.45309E-05	0
NONOXIPENT-PWY: pentose phosphate pathway (non-oxidative branch)|g__Lachnospiraceae_noname.s__Lachnospiraceae_bacterium_5_1_63FAA	6.10417E-06	0	2.86933E-05	2.93925E-05	0	6.26988E-07	3.1489E-06	6.53485E-07	0	6.08284E-06	0	6.70249E-06
NONOXIPENT-PWY: pentose phosphate pathway (non-oxidative branch)|g__Lactobacillus.s__Lactobacillus_acidophilus	0	0	0	0	0	0	0	0	0	0	0	2.82931E-07
NONOXIPENT-PWY: pentose phosphate pathway (non-oxidative branch)|g__Lactococcus.s__Lactococcus_lactis	0	0	0	0	0	0	9.97092E-08	0	0	0	0	0.0007423
NONOXIPENT-PWY: pentose phosphate pathway (non-oxidative branch)|g__Megamonas.s__Megamonas_hypermegale	4.37038E-05	0	0	0	0	0	0	0	0	0	0	0
NONOXIPENT-PWY: pentose phosphate pathway (non-oxidative branch)|g__Megamonas.s__Megamonas_rupellensis	3.88285E-05	0	0	0	0	0	0	0	0	0	0	0
NONOXIPENT-PWY: pentose phosphate pathway (non-oxidative branch)|g__Mitsuokella.s__Mitsuokella_multacida	0	0	0	0	0	1.92326E-06	0	0	0	0	0	0
NONOXIPENT-PWY: pentose phosphate pathway (non-oxidative branch)|g__Odoribacter.s__Odoribacter_splanchnicus	3.35106E-06	0	3.82623E-06	0	0	3.71275E-06	1.05546E-06	1.28725E-06	2.35909E-06	7.48064E-06	0	0
NONOXIPENT-PWY: pentose phosphate pathway (non-oxidative branch)|g__Peptostreptococcaceae_noname.s__Clostridium_bartlettii	0	0	4.47009E-07	0	0	0	0	0	0	0	0	1.76578E-07
NONOXIPENT-PWY: pentose phosphate pathway (non-oxidative branch)|g__Phascolarctobacterium.s__Phascolarctobacterium_succinatutens	1.25714E-05	0	0	0	0	0	0	6.46287E-06	0	0	0	0
NONOXIPENT-PWY: pentose phosphate pathway (non-oxidative branch)|g__Roseburia.s__Roseburia_intestinalis	1.11332E-05	4.47686E-06	0	1.82123E-05	9.97429E-05	1.47103E-06	3.54E-05	1.49826E-06	8.53078E-06	4.73723E-07	0	0
NONOXIPENT-PWY: pentose phosphate pathway (non-oxidative branch)|g__Ruminococcus.s__Ruminococcus_bromii	3.54511E-05	0.000121172	0	7.12517E-05	3.54298E-05	2.35746E-07	2.39968E-05	2.83502E-06	2.9387E-05	1.32875E-05	0	0
NONOXIPENT-PWY: pentose phosphate pathway (non-oxidative branch)|g__Ruminococcus.s__Ruminococcus_lactaris	0	0	0	0	0	0	0	4.60006E-06	0	0	0	0
NONOXIPENT-PWY: pentose phosphate pathway (non-oxidative branch)|g__Veillonella.s__Veillonella_dispar	0	0	0	0	0	1.70003E-06	0	0	0	3.60307E-07	0	0
NONOXIPENT-PWY: pentose phosphate pathway (non-oxidative branch)|g__Veillonella.s__Veillonella_parvula	0	0	0	0	0	2.11845E-06	0	0	0	5.78318E-07	0	0
NONOXIPENT-PWY: pentose phosphate pathway (non-oxidative branch)|unclassified	9.37977E-05	2.6769E-05	9.40357E-05	0.000122194	0.000190341	0.000100442	0.00023848	0.000110633	9.41054E-05	8.33862E-05	9.55769E-05	0.000120583
OANTIGEN-PWY: O-antigen building blocks biosynthesis (E. coli)|g__Bifidobacterium.s__Bifidobacterium_animalis	0	0	0	0	0	0	0	0	0	0	0	1.71623E-07
OANTIGEN-PWY: O-antigen building blocks biosynthesis (E. coli)|g__Bifidobacterium.s__Bifidobacterium_longum	0	0	4.80783E-06	0	0	1.47519E-06	0	0	0	0	0	2.94475E-07
OANTIGEN-PWY: O-antigen building blocks biosynthesis (E. coli)|g__Lactococcus.s__Lactococcus_lactis	0	0	0	0	0	0	0	0	0	0	0	2.4931E-07
OANTIGEN-PWY: O-antigen building blocks biosynthesis (E. coli)|unclassified	0	4.3326E-06	2.02489E-07	0	0	0	0	0	0	0	2.3906E-06	5.72021E-06
ORNARGDEG-PWY: superpathway of L-arginine and L-ornithine degradation|g__Escherichia.s__Escherichia_coli	0	8.81221E-07	1.59407E-06	3.03427E-07	1.07242E-06	0	1.23675E-07	5.69696E-06	0	0	2.96557E-07	3.61768E-07
ORNDEG-PWY: superpathway of ornithine degradation|g__Escherichia.s__Escherichia_coli	0	8.14634E-07	1.73496E-06	0	1.26673E-06	0	4.40307E-07	5.11489E-06	0	0	2.27306E-07	2.96017E-07
P105-PWY: TCA cycle IV (2-oxoglutarate decarboxylase)|g__Escherichia.s__Escherichia_coli	0	1.58354E-06	3.04044E-06	4.23831E-07	2.31339E-06	2.40759E-05	1.82748E-07	1.04661E-05	0	0	6.18203E-07	8.70256E-07
P105-PWY: TCA cycle IV (2-oxoglutarate decarboxylase)|g__Shigella.s__Shigella_flexneri	0	0	0	0	0	0	0	0	0	0	0	2.54799E-07
P108-PWY: pyruvate fermentation to propanoate I|unclassified	0	0	0	0	0	1.93561E-06	0	0	0	0	0	0
P124-PWY: Bifidobacterium shunt|unclassified	2.21872E-05	1.67513E-05	1.64107E-05	5.55607E-05	3.16687E-05	2.64125E-05	4.36776E-05	3.60785E-05	2.39074E-05	2.96654E-05	0	3.33904E-05
P125-PWY: superpathway of (R,R)-butanediol biosynthesis|g__Lactococcus.s__Lactococcus_lactis	0	0	0	1.83632E-07	5.82829E-07	0	0	0	1.22511E-07	0	0	9.76624E-07
P161-PWY: acetylene degradation|g__Enterobacter.s__Enterobacter_cloacae	0	0	5.67682E-07	0	0	1.35449E-07	0	3.70144E-07	0	0	0	0
P161-PWY: acetylene degradation|g__Klebsiella.s__Klebsiella_pneumoniae	0	0	0	0	0	2.94976E-07	0	1.66537E-06	0	0	0	0
P161-PWY: acetylene degradation|g__Streptococcus.s__Streptococcus_sanguinis	0	1.45374E-07	0	0	0	0	0	0	0	0	0	0
P161-PWY: acetylene degradation|unclassified	8.21411E-06	1.67969E-06	5.46207E-06	1.1199E-05	1.17372E-05	4.75394E-06	3.03685E-05	5.34908E-06	3.12731E-06	1.0343E-05	4.59809E-06	1.37095E-05
P162-PWY: L-glutamate degradation V (via hydroxyglutarate)|unclassified	1.14248E-05	6.29214E-06	3.13941E-06	1.01925E-05	1.01732E-05	1.89222E-05	1.20795E-05	2.79631E-05	1.92744E-05	1.51457E-05	0	6.50783E-06
P163-PWY: L-lysine fermentation to acetate and butanoate|unclassified	0	0	0	0	0	0	0	0	0	4.08291E-06	0	0
P164-PWY: purine nucleobases degradation I (anaerobic)|unclassified	1.09378E-05	0	5.57698E-06	2.75371E-05	8.40071E-06	1.08723E-05	6.07427E-06	8.44996E-06	0	3.33319E-06	0	4.41172E-06
P185-PWY: formaldehyde assimilation III (dihydroxyacetone cycle)|g__Escherichia.s__Escherichia_coli	0	0	9.29035E-08	0	0	6.62402E-08	0	0	0	0	0	0
P185-PWY: formaldehyde assimilation III (dihydroxyacetone cycle)|unclassified	6.47133E-06	0	9.85391E-06	1.11961E-05	0	1.75397E-05	1.11864E-05	2.01992E-05	1.60073E-05	1.81552E-05	4.92491E-06	2.83458E-06
P4-PWY: superpathway of L-lysine, L-threonine and L-methionine biosynthesis I|g__Escherichia.s__Escherichia_coli	0	0	0	0	0	4.97358E-06	0	2.4994E-06	0	0	0	0
P4-PWY: superpathway of L-lysine, L-threonine and L-methionine biosynthesis I|unclassified	0	0	7.14558E-06	6.38219E-06	0	2.93479E-07	4.86359E-06	0	3.58413E-06	7.43538E-06	0	5.05633E-06
P42-PWY: incomplete reductive TCA cycle|unclassified	0	0	7.76616E-06	0	4.39989E-06	1.14324E-05	3.9439E-06	0	9.02731E-06	2.97915E-05	0	0
P441-PWY: superpathway of N-acetylneuraminate degradation|unclassified	0	4.86356E-06	1.1333E-05	1.1548E-05	0	1.25204E-05	1.23216E-05	1.49694E-05	9.11428E-06	1.74161E-05	0	5.28492E-06
P461-PWY: hexitol fermentation to lactate, formate, ethanol and acetate|g__Anaerostipes.s__Anaerostipes_hadrus	6.59607E-06	2.99608E-06	2.03271E-05	2.30566E-05	0	1.02242E-06	4.60142E-06	1.88523E-07	0	3.79931E-06	0	7.70328E-06
P461-PWY: hexitol fermentation to lactate, formate, ethanol and acetate|g__Enterobacter.s__Enterobacter_cloacae	0	0	6.69702E-07	0	0	1.07489E-07	0	2.90961E-07	0	0	0	0
P461-PWY: hexitol fermentation to lactate, formate, ethanol and acetate|g__Escherichia.s__Escherichia_coli	0	1.63331E-06	4.20822E-06	9.31425E-07	1.86249E-06	2.8545E-05	3.19511E-07	9.82491E-06	0	1.59698E-07	1.76345E-07	2.17019E-07
P461-PWY: hexitol fermentation to lactate, formate, ethanol and acetate|g__Klebsiella.s__Klebsiella_pneumoniae	0	0	0	0	0	3.31915E-07	0	1.9746E-06	0	0	0	0
P461-PWY: hexitol fermentation to lactate, formate, ethanol and acetate|g__Lachnospiraceae_noname.s__Lachnospiraceae_bacterium_5_1_63FAA	9.6318E-06	0	2.54181E-05	1.97162E-05	0	1.06707E-06	6.04357E-06	4.94601E-07	0	6.20877E-06	0	9.06192E-06
P461-PWY: hexitol fermentation to lactate, formate, ethanol and acetate|g__Lactobacillus.s__Lactobacillus_rhamnosus	0	0	0	0	0	0	0	0	0	0	0	7.51575E-08
P461-PWY: hexitol fermentation to lactate, formate, ethanol and acetate|g__Megamonas.s__Megamonas_hypermegale	5.67251E-05	0	0	0	0	0	0	0	0	0	0	0
P461-PWY: hexitol fermentation to lactate, formate, ethanol and acetate|g__Megamonas.s__Megamonas_rupellensis	3.49314E-05	0	0	0	0	0	0	0	0	0	0	0
P461-PWY: hexitol fermentation to lactate, formate, ethanol and acetate|g__Shigella.s__Shigella_flexneri	0	0	0	0	0	0	0	0	0	0	0	8.17821E-07
P461-PWY: hexitol fermentation to lactate, formate, ethanol and acetate|unclassified	0	0	0.003838	0	0	3.72764E-06	0	1.15215E-06	3.11425E-06	0	0	2.35585E-06
PANTO-PWY: phosphopantothenate biosynthesis I|g__Adlercreutzia.s__Adlercreutzia_equolifaciens	0	0	0	4.0081E-07	0	0	1.55029E-06	1.33195E-06	4.66085E-07	8.12447E-07	0	0
PANTO-PWY: phosphopantothenate biosynthesis I|g__Akkermansia.s__Akkermansia_muciniphila	8.43632E-06	2.83453E-06	0	4.68356E-07	0	1.13119E-07	7.77427E-07	6.87287E-05	9.64522E-07	4.39172E-06	0	2.22727E-06
PANTO-PWY: phosphopantothenate biosynthesis I|g__Alistipes.s__Alistipes_finegoldii	4.20665E-06	0	0	4.19226E-06	0	0	4.24341E-07	3.17862E-06	3.02928E-07	4.81049E-06	0	0
PANTO-PWY: phosphopantothenate biosynthesis I|g__Alistipes.s__Alistipes_indistinctus	1.63641E-06	0	0	0	0	0	0	3.01201E-06	0	0	0	0
PANTO-PWY: phosphopantothenate biosynthesis I|g__Alistipes.s__Alistipes_putredinis	2.97538E-05	0	0	4.18509E-05	3.48056E-05	9.79726E-07	1.9077E-05	1.07879E-05	6.74197E-06	1.80501E-05	7.94552E-06	1.15334E-05
PANTO-PWY: phosphopantothenate biosynthesis I|g__Anaerostipes.s__Anaerostipes_hadrus	6.38889E-06	3.03459E-06	1.35458E-05	8.53762E-06	0	4.70207E-07	3.26274E-06	5.13047E-07	0	2.75637E-06	0	4.12694E-06
PANTO-PWY: phosphopantothenate biosynthesis I|g__Bacteroides.s__Bacteroides_caccae	3.31686E-06	0	0	0	0	0	1.94966E-06	3.64537E-06	3.03435E-06	8.15026E-06	0	0
PANTO-PWY: phosphopantothenate biosynthesis I|g__Bacteroides.s__Bacteroides_cellulosilyticus	0	0	0	5.86094E-06	0	0	0	0	0	0	1.53382E-06	1.79862E-05
PANTO-PWY: phosphopantothenate biosynthesis I|g__Bacteroides.s__Bacteroides_clarus	0	0	0	0	0	3.95503E-06	0	0	0	0	0	0
PANTO-PWY: phosphopantothenate biosynthesis I|g__Bacteroides.s__Bacteroides_coprophilus	0	0	0	0	0	0	0	0	1.43568E-05	1.36834E-05	0	0
PANTO-PWY: phosphopantothenate biosynthesis I|g__Bacteroides.s__Bacteroides_dorei	8.89864E-07	2.31698E-06	0	3.58906E-05	0	3.9371E-07	1.93418E-05	8.12638E-06	8.71283E-06	1.09475E-05	0	2.42499E-06
PANTO-PWY: phosphopantothenate biosynthesis I|g__Bacteroides.s__Bacteroides_eggerthii	1.55815E-06	0	0	0	0	0	0	0	2.47947E-05	1.00671E-05	0	0
PANTO-PWY: phosphopantothenate biosynthesis I|g__Bacteroides.s__Bacteroides_faecis	0	0	1.38023E-05	0	0	0	0	0	3.55988E-06	1.06806E-05	0	0
PANTO-PWY: phosphopantothenate biosynthesis I|g__Bacteroides.s__Bacteroides_finegoldii	2.20778E-06	7.92936E-06	2.43635E-06	0	0	0	0	0	1.4688E-06	5.86915E-06	0	0
PANTO-PWY: phosphopantothenate biosynthesis I|g__Bacteroides.s__Bacteroides_fragilis	0	0	3.63019E-06	0	0	1.58934E-05	1.08886E-05	1.44731E-05	0	0	6.27341E-06	5.75597E-07
PANTO-PWY: phosphopantothenate biosynthesis I|g__Bacteroides.s__Bacteroides_intestinalis	0	0	3.07043E-06	0	0	0	0	0	0	0	0	0
PANTO-PWY: phosphopantothenate biosynthesis I|g__Bacteroides.s__Bacteroides_massiliensis	1.31519E-05	9.82341E-05	0	0	0	0	0	0	7.96613E-06	4.64189E-06	0	0
PANTO-PWY: phosphopantothenate biosynthesis I|g__Bacteroides.s__Bacteroides_nordii	1.92881E-06	0	0	0	0	0	2.87191E-06	1.64812E-06	5.45022E-07	9.8977E-07	0	0
PANTO-PWY: phosphopantothenate biosynthesis I|g__Bacteroides.s__Bacteroides_ovatus	2.8481E-06	4.11241E-05	1.85934E-05	0.001046	0	3.08379E-07	3.7819E-06	2.32072E-06	6.4848E-06	7.13932E-06	5.84154E-05	1.68377E-05
PANTO-PWY: phosphopantothenate biosynthesis I|g__Bacteroides.s__Bacteroides_plebeius	5.96654E-06	0	0	0	0	0	0	0	0	0	0	0
PANTO-PWY: phosphopantothenate biosynthesis I|g__Bacteroides.s__Bacteroides_sp_2_1_22	0	0	0	0	0	0	0	0	6.29131E-07	1.51419E-06	0	0
PANTO-PWY: phosphopantothenate biosynthesis I|g__Bacteroides.s__Bacteroides_stercoris	2.1912E-06	2.19394E-05	4.52645E-05	0	0	0	0	6.51455E-07	0.00010002	1.54132E-05	0	0
PANTO-PWY: phosphopantothenate biosynthesis I|g__Bacteroides.s__Bacteroides_thetaiotaomicron	2.74882E-06	0	1.94519E-06	0	0	1.49704E-05	1.93958E-06	1.60791E-06	0	0	4.23086E-06	7.24791E-06
PANTO-PWY: phosphopantothenate biosynthesis I|g__Bacteroides.s__Bacteroides_uniformis	3.42689E-06	5.22523E-05	2.07936E-05	1.35692E-05	2.18812E-07	2.53979E-05	2.34234E-05	1.43222E-05	3.79046E-05	4.99201E-05	2.05439E-05	7.32512E-05
PANTO-PWY: phosphopantothenate biosynthesis I|g__Bacteroides.s__Bacteroides_vulgatus	2.76042E-05	0.00010623	3.88498E-05	1.4833E-06	1.65178E-07	2.79856E-05	7.55348E-07	1.05439E-07	3.71256E-05	4.19066E-05	0.000111007	8.1106E-05
PANTO-PWY: phosphopantothenate biosynthesis I|g__Bacteroides.s__Bacteroides_xylanisolvens	0	0	1.35252E-05	7.16345E-07	0	4.94927E-06	1.33342E-05	2.74267E-06	0	1.33981E-06	0	0
PANTO-PWY: phosphopantothenate biosynthesis I|g__Barnesiella.s__Barnesiella_intestinihominis	3.07214E-06	0	1.6325E-05	3.62137E-06	0	0	3.24016E-06	4.16115E-06	0	0	0	0
PANTO-PWY: phosphopantothenate biosynthesis I|g__Bilophila.s__Bilophila_wadsworthia	1.09152E-06	0	7.64379E-07	0	0	0	1.29264E-06	6.63074E-07	5.14111E-07	4.72383E-07	0	3.46987E-07
PANTO-PWY: phosphopantothenate biosynthesis I|g__Blautia.s__Blautia_hydrogenotrophica	0	0	2.08632E-07	0	0	0	0	0	0	0	0	0
PANTO-PWY: phosphopantothenate biosynthesis I|g__Blautia.s__Ruminococcus_gnavus	4.41179E-07	1.72171E-06	2.60687E-06	9.11751E-07	0	0	2.35701E-07	0	0	0	1.58242E-05	5.66902E-07
PANTO-PWY: phosphopantothenate biosynthesis I|g__Blautia.s__Ruminococcus_torques	2.4118E-05	2.36438E-05	5.91325E-06	1.37585E-05	2.22749E-05	1.82346E-05	1.47434E-05	1.35645E-05	1.78672E-06	2.75964E-06	1.62059E-05	0
PANTO-PWY: phosphopantothenate biosynthesis I|g__Burkholderiales_noname.s__Burkholderiales_bacterium_1_1_47	0	0	0	0	0	0	1.67573E-06	0	0	0	0	0
PANTO-PWY: phosphopantothenate biosynthesis I|g__Coprobacter.s__Coprobacter_fastidiosus	2.50301E-06	5.34565E-06	0	0	0	2.29204E-06	3.2129E-07	0	3.42092E-07	2.75345E-06	0	0
PANTO-PWY: phosphopantothenate biosynthesis I|g__Coprococcus.s__Coprococcus_eutactus	0	0	0	0	6.64511E-06	0	0	2.13566E-06	0	0	0	0
PANTO-PWY: phosphopantothenate biosynthesis I|g__Desulfovibrio.s__Desulfovibrio_piger	1.07748E-05	0	0	0	0	0	0	0	0	0	0	0
PANTO-PWY: phosphopantothenate biosynthesis I|g__Dorea.s__Dorea_longicatena	1.93689E-05	3.9221E-07	8.15479E-06	1.88816E-05	1.97372E-06	3.1656E-06	2.89027E-06	5.32834E-06	2.74043E-06	2.62425E-06	0	5.55785E-06
PANTO-PWY: phosphopantothenate biosynthesis I|g__Eggerthella.s__Eggerthella_lenta	5.07723E-07	0	0	0	0	0	0	0	0	0	0	0
PANTO-PWY: phosphopantothenate biosynthesis I|g__Enterobacter.s__Enterobacter_cloacae	0	0	5.4768E-07	0	0	0	0	4.17476E-07	0	0	0	0
PANTO-PWY: phosphopantothenate biosynthesis I|g__Enterococcus.s__Enterococcus_faecalis	0	0	0	0	0	6.50465E-08	0	2.22702E-07	0	0	0	0
PANTO-PWY: phosphopantothenate biosynthesis I|g__Escherichia.s__Escherichia_coli	0	1.01458E-06	2.70733E-06	9.0122E-07	1.51481E-06	2.16959E-05	1.52262E-07	6.77668E-06	1.93276E-07	1.21382E-07	5.41094E-07	5.08097E-07
PANTO-PWY: phosphopantothenate biosynthesis I|g__Eubacterium.s__Eubacterium_hallii	1.22237E-05	1.3962E-06	2.54885E-05	2.07707E-05	1.83085E-05	0.004775	6.55875E-06	7.35663E-06	2.89669E-06	1.82335E-06	4.75459E-05	1.44707E-05
PANTO-PWY: phosphopantothenate biosynthesis I|g__Eubacterium.s__Eubacterium_ramulus	0.001916	0	0	3.49109E-06	6.03611E-06	1.77842E-06	1.94998E-07	5.66283E-07	2.2056E-07	3.02187E-07	0	0
PANTO-PWY: phosphopantothenate biosynthesis I|g__Eubacterium.s__Eubacterium_rectale	2.60696E-06	2.74557E-06	0	7.79071E-05	0	7.55971E-06	4.10406E-05	2.30909E-06	1.80925E-05	2.6925E-06	0	1.59669E-06
PANTO-PWY: phosphopantothenate biosynthesis I|g__Eubacterium.s__Eubacterium_ventriosum	5.13858E-06	1.82229E-06	8.02824E-07	2.83177E-06	0	1.93119E-07	1.71368E-06	0	0	0	0	0
PANTO-PWY: phosphopantothenate biosynthesis I|g__Klebsiella.s__Klebsiella_pneumoniae	0	0	0	0	0	0	0	1.72919E-06	0	0	0	0
PANTO-PWY: phosphopantothenate biosynthesis I|g__Lachnospiraceae_noname.s__Lachnospiraceae_bacterium_1_1_57FAA	0	0	2.92857E-06	0	0	0	0	0	0	0	0	0
PANTO-PWY: phosphopantothenate biosynthesis I|g__Lachnospiraceae_noname.s__Lachnospiraceae_bacterium_2_1_58FAA	3.99765E-07	2.04685E-06	2.39165E-06	1.48649E-06	0	0	0	0	0	0	1.73386E-05	0
PANTO-PWY: phosphopantothenate biosynthesis I|g__Lachnospiraceae_noname.s__Lachnospiraceae_bacterium_3_1_46FAA	0	0	3.59201E-06	1.31761E-05	0	0	2.06904E-06	6.87726E-07	1.63749E-06	9.66813E-08	0	0
PANTO-PWY: phosphopantothenate biosynthesis I|g__Lachnospiraceae_noname.s__Lachnospiraceae_bacterium_5_1_63FAA	6.88037E-06	0	1.46156E-05	1.56586E-05	0	5.26964E-07	3.52917E-06	2.88538E-07	0	3.39674E-06	0	5.08659E-06
PANTO-PWY: phosphopantothenate biosynthesis I|g__Megamonas.s__Megamonas_rupellensis	4.31475E-05	0	0	0	0	0	0	0	0	0	0	0
PANTO-PWY: phosphopantothenate biosynthesis I|g__Megasphaera.s__Megasphaera_elsdenii	0	0	0	0	0	4.41465E-06	0	0	0	0	0	0
PANTO-PWY: phosphopantothenate biosynthesis I|g__Odoribacter.s__Odoribacter_splanchnicus	3.20577E-06	0	4.54925E-06	0	0	3.49976E-06	1.65717E-06	1.14882E-06	2.19339E-06	7.17935E-06	0	0
PANTO-PWY: phosphopantothenate biosynthesis I|g__Parabacteroides.s__Parabacteroides_distasonis	3.50377E-06	0	1.71351E-05	4.29202E-06	0	2.17767E-06	3.69966E-06	9.66394E-06	3.20178E-06	5.09762E-06	0	1.98106E-06
PANTO-PWY: phosphopantothenate biosynthesis I|g__Parabacteroides.s__Parabacteroides_johnsonii	0	0	0	0	0	1.17881E-06	1.3109E-07	7.11037E-07	0	0	0	0
PANTO-PWY: phosphopantothenate biosynthesis I|g__Parabacteroides.s__Parabacteroides_merdae	7.69075E-06	1.67189E-05	1.89699E-06	0	0	1.96971E-06	3.2545E-06	5.35288E-06	3.90105E-06	7.4549E-06	1.11052E-05	1.07689E-05
PANTO-PWY: phosphopantothenate biosynthesis I|g__Parabacteroides.s__Parabacteroides_sp_D13	0	0	0	0	0	2.01093E-06	0	0	0	0	0	0
PANTO-PWY: phosphopantothenate biosynthesis I|g__Parasutterella.s__Parasutterella_excrementihominis	0	0	0	0	0	0	3.18249E-06	0	0	0	0	0
PANTO-PWY: phosphopantothenate biosynthesis I|g__Phascolarctobacterium.s__Phascolarctobacterium_succinatutens	1.44337E-05	0	0	0	0	0	0	8.38585E-06	0	0	0	0
PANTO-PWY: phosphopantothenate biosynthesis I|g__Roseburia.s__Roseburia_hominis	2.38936E-06	1.99974E-07	3.36035E-06	5.12158E-07	0	9.49463E-07	1.56412E-06	0.0006288	0	3.35538E-07	0	0
PANTO-PWY: phosphopantothenate biosynthesis I|g__Roseburia.s__Roseburia_intestinalis	1.01078E-05	4.25308E-06	0	1.40978E-05	8.65649E-05	7.19294E-07	2.62946E-05	1.42044E-06	5.25432E-06	1.26602E-07	0	0
PANTO-PWY: phosphopantothenate biosynthesis I|g__Ruminococcus.s__Ruminococcus_callidus	0	0	0	0	0	0	1.13807E-05	0	7.77004E-07	0	0	0
PANTO-PWY: phosphopantothenate biosynthesis I|g__Ruminococcus.s__Ruminococcus_lactaris	0	0	0	0	0	0	0	2.92492E-06	0	2.17452E-06	0	0
PANTO-PWY: phosphopantothenate biosynthesis I|g__Ruminococcus.s__Ruminococcus_sp_5_1_39BFAA	7.48213E-06	0	1.11367E-05	2.54129E-05	1.93751E-05	7.5433E-07	1.55053E-05	6.57471E-06	6.13042E-06	2.29716E-06	1.38986E-05	1.97349E-05
PANTO-PWY: phosphopantothenate biosynthesis I|g__Shigella.s__Shigella_flexneri	0	0	0	0	0	0	0	0	0	0	0	2.72511E-07
PANTO-PWY: phosphopantothenate biosynthesis I|unclassified	5.12005E-05	7.51338E-06	5.40864E-05	7.11839E-05	0.000112655	7.23605E-05	0.000237983	0.000112495	8.90791E-05	5.78804E-05	2.27814E-05	0.000120627
PANTOSYN-PWY: pantothenate and coenzyme A biosynthesis I|g__Akkermansia.s__Akkermansia_muciniphila	8.17974E-06	2.50905E-06	0	5.71417E-07	0	0	5.01501E-07	6.9135E-05	8.18635E-07	5.17503E-06	0	2.44579E-06
PANTOSYN-PWY: pantothenate and coenzyme A biosynthesis I|g__Anaerostipes.s__Anaerostipes_hadrus	5.06483E-06	1.75871E-06	1.03644E-05	8.20967E-06	0	3.81375E-07	2.22674E-06	0	0	2.58219E-06	0	3.62786E-06
PANTOSYN-PWY: pantothenate and coenzyme A biosynthesis I|g__Bacteroides.s__Bacteroides_ovatus	3.20493E-06	4.47611E-05	2.01131E-05	1.35828E-06	0	1.10652E-07	3.84273E-06	3.36898E-06	6.48466E-06	8.34487E-06	6.58786E-05	2.02826E-05
PANTOSYN-PWY: pantothenate and coenzyme A biosynthesis I|g__Bacteroides.s__Bacteroides_xylanisolvens	0	0	1.27088E-05	4.99874E-07	0	4.78604E-06	1.19941E-05	2.49219E-06	0	6.26481E-07	0	0
PANTOSYN-PWY: pantothenate and coenzyme A biosynthesis I|g__Blautia.s__Ruminococcus_torques	8.5427E-07	3.42475E-06	5.09548E-06	4.79496E-06	4.15636E-06	1.98703E-06	8.77487E-06	8.24519E-06	3.58081E-07	1.38676E-06	0	0
PANTOSYN-PWY: pantothenate and coenzyme A biosynthesis I|g__Desulfovibrio.s__Desulfovibrio_piger	9.05703E-06	0	0	0	0	0	0	0	0	0	0	0
PANTOSYN-PWY: pantothenate and coenzyme A biosynthesis I|g__Eggerthella.s__Eggerthella_lenta	2.03441E-07	0	0	0	0	0	0	0	0	0	0	0
PANTOSYN-PWY: pantothenate and coenzyme A biosynthesis I|g__Escherichia.s__Escherichia_coli	0	0	2.32316E-06	4.7431E-07	1.23551E-06	1.09851E-05	0	6.81489E-06	0	0	5.12252E-07	0
PANTOSYN-PWY: pantothenate and coenzyme A biosynthesis I|g__Eubacterium.s__Eubacterium_ventriosum	4.73088E-06	1.12903E-06	8.95464E-07	2.78833E-06	0	0	1.1647E-06	0	0	0	0	0
PANTOSYN-PWY: pantothenate and coenzyme A biosynthesis I|g__Lachnospiraceae_noname.s__Lachnospiraceae_bacterium_5_1_63FAA	6.51374E-06	0	1.10371E-05	1.32262E-05	0	5.75615E-07	2.65206E-06	0	0	3.48686E-06	0	4.73023E-06
PANTOSYN-PWY: pantothenate and coenzyme A biosynthesis I|g__Odoribacter.s__Odoribacter_splanchnicus	3.18869E-06	0	4.47801E-06	0	0	2.94158E-06	1.65159E-06	1.11665E-06	2.3692E-06	6.71392E-06	0	0
PANTOSYN-PWY: pantothenate and coenzyme A biosynthesis I|g__Phascolarctobacterium.s__Phascolarctobacterium_succinatutens	1.35809E-05	0	0	0	0	0	0	7.35481E-06	0	0	0	0
PANTOSYN-PWY: pantothenate and coenzyme A biosynthesis I|unclassified	4.38942E-05	1.06862E-05	4.24619E-05	4.66983E-05	4.9307E-05	5.30636E-05	0.000102517	5.60634E-05	3.85164E-05	2.81265E-05	0.02409	7.5926E-05
PENTOSE-P-PWY: pentose phosphate pathway|g__Enterobacter.s__Enterobacter_cloacae	0	0	4.15916E-07	0	0	9.00202E-08	0	5.49809E-07	0	0	0	0
PENTOSE-P-PWY: pentose phosphate pathway|g__Escherichia.s__Escherichia_coli	0	0	1.10704E-07	0	0	5.16293E-07	0	6.51517E-06	0	0	0	0
PENTOSE-P-PWY: pentose phosphate pathway|g__Klebsiella.s__Klebsiella_pneumoniae	0	0	0	0	0	2.84976E-07	0	2.65419E-06	0	0	0	0
PENTOSE-P-PWY: pentose phosphate pathway|g__Odoribacter.s__Odoribacter_splanchnicus	3.17746E-06	0	3.63214E-06	0	0	3.47955E-06	1.04621E-06	9.55947E-07	2.05885E-06	7.35761E-06	0	0
PENTOSE-P-PWY: pentose phosphate pathway|unclassified	0	0	5.71417E-06	0	0	3.23298E-06	0	3.64415E-06	0	2.40253E-06	9.8883E-07	6.08726E-06
PEPTIDOGLYCANSYN-PWY: peptidoglycan biosynthesis I (meso-diaminopimelate containing)|g__Adlercreutzia.s__Adlercreutzia_equolifaciens	0	0	0	3.21101E-07	0	0	1.26589E-06	2.10497E-06	3.78029E-07	3.79543E-07	0	0
PEPTIDOGLYCANSYN-PWY: peptidoglycan biosynthesis I (meso-diaminopimelate containing)|g__Alistipes.s__Alistipes_finegoldii	4.16948E-06	0	0	4.34552E-06	0	0	9.97703E-07	3.21468E-06	0	3.77691E-06	0	0
PEPTIDOGLYCANSYN-PWY: peptidoglycan biosynthesis I (meso-diaminopimelate containing)|g__Alistipes.s__Alistipes_indistinctus	1.59333E-06	0	0	0	0	0	0	2.3357E-06	0	0	0	0
PEPTIDOGLYCANSYN-PWY: peptidoglycan biosynthesis I (meso-diaminopimelate containing)|g__Alistipes.s__Alistipes_onderdonkii	2.68105E-06	0	6.30892E-06	0	0	0	4.30238E-06	4.55671E-06	0	4.4422E-06	0	0
PEPTIDOGLYCANSYN-PWY: peptidoglycan biosynthesis I (meso-diaminopimelate containing)|g__Alistipes.s__Alistipes_putredinis	3.03104E-05	0	0	3.9075E-05	3.68729E-05	7.00354E-07	2.08626E-05	1.12486E-05	6.35406E-06	1.75181E-05	7.70785E-06	7.42255E-06
PEPTIDOGLYCANSYN-PWY: peptidoglycan biosynthesis I (meso-diaminopimelate containing)|g__Anaerostipes.s__Anaerostipes_hadrus	4.34323E-06	2.22693E-06	1.04565E-05	1.07108E-05	0	4.52805E-07	2.50986E-06	3.08242E-07	0	3.01857E-06	0	4.50999E-06
PEPTIDOGLYCANSYN-PWY: peptidoglycan biosynthesis I (meso-diaminopimelate containing)|g__Bacteroides.s__Bacteroides_dorei	0.0002945	4.14383E-07	0	2.82399E-05	0	2.54524E-07	3.3904E-06	6.73772E-06	9.07994E-06	1.28489E-05	0	1.35719E-07
PEPTIDOGLYCANSYN-PWY: peptidoglycan biosynthesis I (meso-diaminopimelate containing)|g__Bacteroides.s__Bacteroides_finegoldii	1.37686E-06	5.8353E-06	1.67746E-06	0	0	0	0	0	1.50959E-06	5.91719E-06	0	0
PEPTIDOGLYCANSYN-PWY: peptidoglycan biosynthesis I (meso-diaminopimelate containing)|g__Bacteroides.s__Bacteroides_fragilis	0	0	3.55592E-06	0	0	1.42374E-05	1.03061E-05	1.53342E-05	0	0	4.69173E-06	7.62969E-07
PEPTIDOGLYCANSYN-PWY: peptidoglycan biosynthesis I (meso-diaminopimelate containing)|g__Bacteroides.s__Bacteroides_nordii	1.61141E-06	0	0	0	0	0	3.10593E-06	1.47493E-06	0	1.11055E-06	0	0
PEPTIDOGLYCANSYN-PWY: peptidoglycan biosynthesis I (meso-diaminopimelate containing)|g__Bacteroides.s__Bacteroides_ovatus	3.76931E-06	0.04561	2.83744E-06	1.78734E-06	0	0	3.73771E-06	5.15076E-06	5.97806E-06	8.08378E-06	9.8903E-07	1.64509E-05
PEPTIDOGLYCANSYN-PWY: peptidoglycan biosynthesis I (meso-diaminopimelate containing)|g__Bacteroides.s__Bacteroides_plebeius	7.49842E-06	0	0	0	0	0	0	0	0	0	0	0
PEPTIDOGLYCANSYN-PWY: peptidoglycan biosynthesis I (meso-diaminopimelate containing)|g__Bacteroides.s__Bacteroides_sp_2_1_22	0	0	0	0	0	0	0	0	0	5.44783E-07	0	0
PEPTIDOGLYCANSYN-PWY: peptidoglycan biosynthesis I (meso-diaminopimelate containing)|g__Bacteroides.s__Bacteroides_uniformis	2.82492E-06	4.70745E-05	1.87766E-05	1.20676E-05	0	2.24638E-05	2.37802E-05	1.30222E-05	3.76943E-05	4.31725E-05	1.82414E-05	6.29867E-05
PEPTIDOGLYCANSYN-PWY: peptidoglycan biosynthesis I (meso-diaminopimelate containing)|g__Bacteroides.s__Bacteroides_vulgatus	2.82964E-05	0.000111038	4.45076E-05	9.26936E-07	0	3.13624E-05	3.49663E-07	5.08882E-07	3.75841E-05	4.63983E-05	0.000103137	7.39524E-05
PEPTIDOGLYCANSYN-PWY: peptidoglycan biosynthesis I (meso-diaminopimelate containing)|g__Bacteroides.s__Bacteroides_xylanisolvens	0	0	1.42689E-05	5.00572E-07	0	2.44317E-06	1.18789E-05	1.97398E-06	0	3.78579E-07	0	0
PEPTIDOGLYCANSYN-PWY: peptidoglycan biosynthesis I (meso-diaminopimelate containing)|g__Barnesiella.s__Barnesiella_intestinihominis	2.52377E-06	0	1.34575E-05	3.08027E-06	0	0	3.14641E-06	3.72466E-06	0	0	0	0
PEPTIDOGLYCANSYN-PWY: peptidoglycan biosynthesis I (meso-diaminopimelate containing)|g__Bifidobacterium.s__Bifidobacterium_adolescentis	0	0	0	0	0	0	0	0	5.85484E-06	7.26493E-07	0	0
PEPTIDOGLYCANSYN-PWY: peptidoglycan biosynthesis I (meso-diaminopimelate containing)|g__Bifidobacterium.s__Bifidobacterium_animalis	0	0	0	0	0	0	0	0	0	0	0	1.88098E-07
PEPTIDOGLYCANSYN-PWY: peptidoglycan biosynthesis I (meso-diaminopimelate containing)|g__Bifidobacterium.s__Bifidobacterium_catenulatum	0	0	0	0	0	1.05198E-06	0	0	0	8.55287E-06	0	7.09757E-07
PEPTIDOGLYCANSYN-PWY: peptidoglycan biosynthesis I (meso-diaminopimelate containing)|g__Bifidobacterium.s__Bifidobacterium_dentium	0	0	0	0	0	0	0	1.56804E-07	0	0	0	0
PEPTIDOGLYCANSYN-PWY: peptidoglycan biosynthesis I (meso-diaminopimelate containing)|g__Bilophila.s__Bilophila_wadsworthia	1.45554E-06	0	8.02602E-07	0	0	0	1.34011E-06	9.61614E-07	6.98275E-07	3.61922E-07	0	2.49723E-07
PEPTIDOGLYCANSYN-PWY: peptidoglycan biosynthesis I (meso-diaminopimelate containing)|g__Blautia.s__Blautia_hydrogenotrophica	0	0	2.81184E-07	0	0	0	0	0	0	0	0	0
PEPTIDOGLYCANSYN-PWY: peptidoglycan biosynthesis I (meso-diaminopimelate containing)|g__Blautia.s__Ruminococcus_gnavus	2.62366E-07	2.15246E-06	1.06677E-06	5.69853E-07	0	0	1.39503E-07	0	0	0	1.24934E-05	3.85782E-07
PEPTIDOGLYCANSYN-PWY: peptidoglycan biosynthesis I (meso-diaminopimelate containing)|g__Blautia.s__Ruminococcus_obeum	0	0	0	8.12361E-06	5.08275E-07	3.76467E-07	3.02196E-06	2.1848E-06	0	6.91084E-07	0	0
PEPTIDOGLYCANSYN-PWY: peptidoglycan biosynthesis I (meso-diaminopimelate containing)|g__Blautia.s__Ruminococcus_torques	3.5839E-05	2.65006E-05	6.33214E-06	1.36862E-05	2.5247E-05	1.87333E-05	6.9855E-06	1.52042E-05	1.38581E-06	2.20358E-06	5.86367E-06	0
PEPTIDOGLYCANSYN-PWY: peptidoglycan biosynthesis I (meso-diaminopimelate containing)|g__Burkholderiales_noname.s__Burkholderiales_bacterium_1_1_47	0	0	0	0	0	0	2.22867E-06	0	0	1.37645E-07	0	0
PEPTIDOGLYCANSYN-PWY: peptidoglycan biosynthesis I (meso-diaminopimelate containing)|g__Clostridium.s__Clostridium_leptum	6.76845E-07	0	2.11323E-06	0	0	0	0	0	0	0	0	0
PEPTIDOGLYCANSYN-PWY: peptidoglycan biosynthesis I (meso-diaminopimelate containing)|g__Clostridium.s__Clostridium_nexile	0	0	0	0	0	5.45598E-07	0	0	0	0	7.8655E-06	0
PEPTIDOGLYCANSYN-PWY: peptidoglycan biosynthesis I (meso-diaminopimelate containing)|g__Clostridium.s__Clostridium_perfringens	0	0	0	0	0	5.01973E-07	0	3.61557E-07	0	0	0	0
PEPTIDOGLYCANSYN-PWY: peptidoglycan biosynthesis I (meso-diaminopimelate containing)|g__Collinsella.s__Collinsella_aerofaciens	5.03274E-06	5.81722E-07	0	0	0	4.38481E-06	3.10123E-06	8.28032E-07	0	2.26082E-06	0	1.74128E-06
PEPTIDOGLYCANSYN-PWY: peptidoglycan biosynthesis I (meso-diaminopimelate containing)|g__Coprobacter.s__Coprobacter_fastidiosus	2.00956E-06	4.71324E-06	0	0	0	2.38821E-06	0	0	0	2.26741E-06	0	0
PEPTIDOGLYCANSYN-PWY: peptidoglycan biosynthesis I (meso-diaminopimelate containing)|g__Coprococcus.s__Coprococcus_comes	4.62408E-06	0	0	1.03698E-05	7.44538E-06	3.63299E-06	1.53328E-06	2.33249E-06	2.56945E-06	1.86176E-06	1.02245E-05	3.50526E-06
PEPTIDOGLYCANSYN-PWY: peptidoglycan biosynthesis I (meso-diaminopimelate containing)|g__Coprococcus.s__Coprococcus_eutactus	0	0	0	0	7.57034E-06	0	0	2.17736E-06	0	0	0	0
PEPTIDOGLYCANSYN-PWY: peptidoglycan biosynthesis I (meso-diaminopimelate containing)|g__Desulfovibrio.s__Desulfovibrio_piger	7.45079E-06	0	0	0	0	0	0	0	0	0	0	0
PEPTIDOGLYCANSYN-PWY: peptidoglycan biosynthesis I (meso-diaminopimelate containing)|g__Dorea.s__Dorea_formicigenerans	4.67028E-06	2.37547E-06	1.26824E-06	5.99442E-06	1.93456E-06	2.04807E-06	9.91958E-07	8.6727E-07	0	0	1.39388E-06	1.07633E-06
PEPTIDOGLYCANSYN-PWY: peptidoglycan biosynthesis I (meso-diaminopimelate containing)|g__Enterobacter.s__Enterobacter_cloacae	0	0	2.02926E-07	0	0	0	0	0	0	0	0	0
PEPTIDOGLYCANSYN-PWY: peptidoglycan biosynthesis I (meso-diaminopimelate containing)|g__Erysipelotrichaceae_noname.s__Clostridium_spiroforme	0	0	0	0	2.18604E-06	0	0	0	0	0	0	0
PEPTIDOGLYCANSYN-PWY: peptidoglycan biosynthesis I (meso-diaminopimelate containing)|g__Erysipelotrichaceae_noname.s__Erysipelotrichaceae_bacterium_21_3	0	0	0	0	0	0	0	0	0	0	0	1.47109E-07
PEPTIDOGLYCANSYN-PWY: peptidoglycan biosynthesis I (meso-diaminopimelate containing)|g__Erysipelotrichaceae_noname.s__Erysipelotrichaceae_bacterium_6_1_45	0	0	7.85692E-08	0	0	0	0	0	0	0	0	0
PEPTIDOGLYCANSYN-PWY: peptidoglycan biosynthesis I (meso-diaminopimelate containing)|g__Erysipelotrichaceae_noname.s__Eubacterium_biforme	0	0	0	0	0	2.61812E-06	0	4.2359E-07	1.18187E-06	7.8639E-07	0	0
PEPTIDOGLYCANSYN-PWY: peptidoglycan biosynthesis I (meso-diaminopimelate containing)|g__Erysipelotrichaceae_noname.s__Eubacterium_dolichum	0	0	0	5.06149E-07	0	0	0	0	0	0	0	1.41751E-07
PEPTIDOGLYCANSYN-PWY: peptidoglycan biosynthesis I (meso-diaminopimelate containing)|g__Escherichia.s__Escherichia_coli	0	7.04032E-07	2.18309E-06	3.80668E-07	1.1615E-06	1.38039E-05	0.0001927	6.55353E-06	0	0	1.61459E-07	3.67592E-07
PEPTIDOGLYCANSYN-PWY: peptidoglycan biosynthesis I (meso-diaminopimelate containing)|g__Eubacterium.s__Eubacterium_ramulus	1.93228E-06	2.28901E-07	0	4.08387E-06	5.35503E-06	1.49121E-06	3.93722E-07	4.26321E-07	4.15785E-07	0	0	0
PEPTIDOGLYCANSYN-PWY: peptidoglycan biosynthesis I (meso-diaminopimelate containing)|g__Eubacterium.s__Eubacterium_sp_3_1_31	0	0	1.16221E-06	2.52499E-06	0	0	0	0	1.16881E-07	0	0	0
PEPTIDOGLYCANSYN-PWY: peptidoglycan biosynthesis I (meso-diaminopimelate containing)|g__Eubacterium.s__Eubacterium_ventriosum	4.2872E-06	1.0723E-06	1.2233E-06	2.98748E-06	0	2.2375E-07	1.04141E-06	0	0	0	0	0
PEPTIDOGLYCANSYN-PWY: peptidoglycan biosynthesis I (meso-diaminopimelate containing)|g__Faecalibacterium.s__Faecalibacterium_prausnitzii	6.19153E-05	0	4.02443E-05	1.50029E-05	0.000163015	1.99296E-05	2.93913E-05	1.49598E-05	3.8901E-05	1.72486E-05	0	1.26763E-05
PEPTIDOGLYCANSYN-PWY: peptidoglycan biosynthesis I (meso-diaminopimelate containing)|g__Flavonifractor.s__Flavonifractor_plautii	0	5.42726E-07	2.74114E-07	1.31804E-07	0	0	0	0	0	0	2.93642E-07	0
PEPTIDOGLYCANSYN-PWY: peptidoglycan biosynthesis I (meso-diaminopimelate containing)|g__Fusobacterium.s__Fusobacterium_mortiferum	6.64942E-07	0	0	0	0	0	0	0	0	0	0	0
PEPTIDOGLYCANSYN-PWY: peptidoglycan biosynthesis I (meso-diaminopimelate containing)|g__Haemophilus.s__Haemophilus_parainfluenzae	0	0	0	0	0	4.53585E-07	0	0	0	8.0694E-07	0	0
PEPTIDOGLYCANSYN-PWY: peptidoglycan biosynthesis I (meso-diaminopimelate containing)|g__Lachnospiraceae_noname.s__Lachnospiraceae_bacterium_1_1_57FAA	0	0	1.05412E-06	0	0	0	0	0	0	0	0	0
PEPTIDOGLYCANSYN-PWY: peptidoglycan biosynthesis I (meso-diaminopimelate containing)|g__Lachnospiraceae_noname.s__Lachnospiraceae_bacterium_1_4_56FAA	6.03809E-07	0	0	1.92564E-07	0	0	0	0	0	0	8.66054E-07	0
PEPTIDOGLYCANSYN-PWY: peptidoglycan biosynthesis I (meso-diaminopimelate containing)|g__Lachnospiraceae_noname.s__Lachnospiraceae_bacterium_2_1_58FAA	3.10456E-07	2.3096E-06	1.06266E-06	5.37784E-07	0	0	0	0	0	0	1.50639E-05	0
PEPTIDOGLYCANSYN-PWY: peptidoglycan biosynthesis I (meso-diaminopimelate containing)|g__Lachnospiraceae_noname.s__Lachnospiraceae_bacterium_3_1_46FAA	0	0	1.40902E-06	1.08953E-05	0	0	9.75366E-07	1.12081E-07	7.85489E-07	0	0	0
PEPTIDOGLYCANSYN-PWY: peptidoglycan biosynthesis I (meso-diaminopimelate containing)|g__Lachnospiraceae_noname.s__Lachnospiraceae_bacterium_3_1_57FAA_CT1	0	0	0	0	1.61431E-07	0	0	0	0	0	0	0
PEPTIDOGLYCANSYN-PWY: peptidoglycan biosynthesis I (meso-diaminopimelate containing)|g__Lachnospiraceae_noname.s__Lachnospiraceae_bacterium_5_1_57FAA	0	0	0	0	0	0	0	0	0	0	0	8.37467E-07
PEPTIDOGLYCANSYN-PWY: peptidoglycan biosynthesis I (meso-diaminopimelate containing)|g__Lachnospiraceae_noname.s__Lachnospiraceae_bacterium_5_1_63FAA	5.07768E-06	0	1.0348E-05	1.22107E-05	0	5.82459E-07	2.86001E-06	2.60073E-07	0	2.75896E-06	0	4.34746E-06
PEPTIDOGLYCANSYN-PWY: peptidoglycan biosynthesis I (meso-diaminopimelate containing)|g__Lachnospiraceae_noname.s__Lachnospiraceae_bacterium_6_1_63FAA	0	0	0	1.89678E-07	0	0	0	0	0	0	0	0
PEPTIDOGLYCANSYN-PWY: peptidoglycan biosynthesis I (meso-diaminopimelate containing)|g__Lachnospiraceae_noname.s__Lachnospiraceae_bacterium_7_1_58FAA	0	8.1336E-07	3.23648E-07	0	4.66449E-07	0	3.24844E-07	0	0	0	2.59738E-07	1.91286E-07
PEPTIDOGLYCANSYN-PWY: peptidoglycan biosynthesis I (meso-diaminopimelate containing)|g__Lachnospiraceae_noname.s__Lachnospiraceae_bacterium_9_1_43BFAA	0	3.16817E-07	0	0	0	0	0	0	0	0	1.61121E-07	0
PEPTIDOGLYCANSYN-PWY: peptidoglycan biosynthesis I (meso-diaminopimelate containing)|g__Lactococcus.s__Lactococcus_lactis	0	0	0	0	0	0	0	0	0	0	0	5.53896E-07
PEPTIDOGLYCANSYN-PWY: peptidoglycan biosynthesis I (meso-diaminopimelate containing)|g__Megasphaera.s__Megasphaera_elsdenii	0	0	0	0	0	3.88294E-06	0	0	0	0	0	0
PEPTIDOGLYCANSYN-PWY: peptidoglycan biosynthesis I (meso-diaminopimelate containing)|g__Mitsuokella.s__Mitsuokella_multacida	0	0	0	0	0	8.78868E-07	0	0	0	0	0	0
PEPTIDOGLYCANSYN-PWY: peptidoglycan biosynthesis I (meso-diaminopimelate containing)|g__Odoribacter.s__Odoribacter_splanchnicus	2.74053E-06	0	4.26451E-06	0	0	3.40306E-06	1.5448E-06	1.07621E-06	2.18513E-06	6.6125E-06	0	0
PEPTIDOGLYCANSYN-PWY: peptidoglycan biosynthesis I (meso-diaminopimelate containing)|g__Parabacteroides.s__Parabacteroides_distasonis	3.3322E-06	0	1.81276E-05	3.01063E-06	0	2.37973E-06	3.37008E-06	8.62639E-06	2.71594E-06	4.83689E-06	0	1.9287E-06
PEPTIDOGLYCANSYN-PWY: peptidoglycan biosynthesis I (meso-diaminopimelate containing)|g__Parabacteroides.s__Parabacteroides_johnsonii	0	0	0	0	0	9.22989E-07	0	9.53732E-07	0	0	0	0
PEPTIDOGLYCANSYN-PWY: peptidoglycan biosynthesis I (meso-diaminopimelate containing)|g__Parabacteroides.s__Parabacteroides_merdae	7.61122E-06	1.95991E-05	1.56324E-06	0	0	1.1829E-06	2.38937E-06	3.55304E-06	3.44995E-06	5.08887E-06	1.05249E-05	9.48707E-06
PEPTIDOGLYCANSYN-PWY: peptidoglycan biosynthesis I (meso-diaminopimelate containing)|g__Parabacteroides.s__Parabacteroides_sp_D13	0	0	0	0	0	2.59996E-06	0	0	0	0	0	0
PEPTIDOGLYCANSYN-PWY: peptidoglycan biosynthesis I (meso-diaminopimelate containing)|g__Parasutterella.s__Parasutterella_excrementihominis	0	0	0	0	0	0	1.34172E-06	0	0	0	0	0
PEPTIDOGLYCANSYN-PWY: peptidoglycan biosynthesis I (meso-diaminopimelate containing)|g__Phascolarctobacterium.s__Phascolarctobacterium_succinatutens	1.25264E-05	0	0	0	0	0	0	6.06998E-06	0	0	0	0
PEPTIDOGLYCANSYN-PWY: peptidoglycan biosynthesis I (meso-diaminopimelate containing)|g__Roseburia.s__Roseburia_hominis	1.92642E-06	4.88191E-07	2.6177E-06	2.57605E-07	0	1.01788E-06	1.49708E-06	4.86535E-07	0	0	0	0
PEPTIDOGLYCANSYN-PWY: peptidoglycan biosynthesis I (meso-diaminopimelate containing)|g__Ruminococcaceae_noname.s__Ruminococcaceae_bacterium_D16	0	0	6.49982E-07	0	0	0	0	0	0	0	0	0
PEPTIDOGLYCANSYN-PWY: peptidoglycan biosynthesis I (meso-diaminopimelate containing)|g__Ruminococcus.s__Ruminococcus_lactaris	0	0	0	0	0	0	0	3.17868E-06	0	1.60054E-06	0	0
PEPTIDOGLYCANSYN-PWY: peptidoglycan biosynthesis I (meso-diaminopimelate containing)|g__Ruminococcus.s__Ruminococcus_sp_5_1_39BFAA	1.69663E-05	0	2.36468E-05	2.96185E-05	2.24255E-05	9.70581E-06	1.97451E-05	9.35375E-06	8.1393E-06	4.90205E-06	2.47476E-05	2.7503E-05
PEPTIDOGLYCANSYN-PWY: peptidoglycan biosynthesis I (meso-diaminopimelate containing)|g__Shigella.s__Shigella_flexneri	0	0	0	0	0	0	0	0	0	0	0	3.01987E-07
PEPTIDOGLYCANSYN-PWY: peptidoglycan biosynthesis I (meso-diaminopimelate containing)|g__Streptococcus.s__Streptococcus_australis	0	2.41224E-07	0	0	0	0	0	3.03303E-07	0	0	0	1.56449E-07
PEPTIDOGLYCANSYN-PWY: peptidoglycan biosynthesis I (meso-diaminopimelate containing)|g__Streptococcus.s__Streptococcus_infantis	0	2.59138E-06	0	0	0	0	0	3.37568E-07	0	0	0	1.67414E-07
PEPTIDOGLYCANSYN-PWY: peptidoglycan biosynthesis I (meso-diaminopimelate containing)|g__Streptococcus.s__Streptococcus_mitis_oralis_pneumoniae	0	4.15024E-06	7.96942E-07	0	0	2.77615E-07	0	5.60534E-07	0	0	0	0
PEPTIDOGLYCANSYN-PWY: peptidoglycan biosynthesis I (meso-diaminopimelate containing)|g__Streptococcus.s__Streptococcus_mutans	0	0	0	0	0	1.9523E-07	0	2.5221E-07	0	0	0	0
PEPTIDOGLYCANSYN-PWY: peptidoglycan biosynthesis I (meso-diaminopimelate containing)|g__Streptococcus.s__Streptococcus_parasanguinis	0	0	0	0	2.99917E-07	3.38058E-06	0	2.33705E-06	0	0	1.90017E-07	2.49742E-06
PEPTIDOGLYCANSYN-PWY: peptidoglycan biosynthesis I (meso-diaminopimelate containing)|g__Streptococcus.s__Streptococcus_sanguinis	0	0	0	0	0	1.19097E-07	0	0	0	0	0	0
PEPTIDOGLYCANSYN-PWY: peptidoglycan biosynthesis I (meso-diaminopimelate containing)|g__Sutterella.s__Sutterella_wadsworthensis	5.41924E-06	0	0	0	0	4.37314E-06	0	8.12045E-06	0	0	0	0
PEPTIDOGLYCANSYN-PWY: peptidoglycan biosynthesis I (meso-diaminopimelate containing)|g__Veillonella.s__Veillonella_atypica	0	0	0	0	0	1.14247E-06	0	0	0	1.62223E-07	0	0
PEPTIDOGLYCANSYN-PWY: peptidoglycan biosynthesis I (meso-diaminopimelate containing)|g__Veillonella.s__Veillonella_dispar	0	0	0	0	0	1.08093E-06	0	0	0	4.56948E-07	0	0
PEPTIDOGLYCANSYN-PWY: peptidoglycan biosynthesis I (meso-diaminopimelate containing)|g__Veillonella.s__Veillonella_parvula	0	0	0	0	0	2.65757E-06	0	0	0	4.10749E-07	0	0
PEPTIDOGLYCANSYN-PWY: peptidoglycan biosynthesis I (meso-diaminopimelate containing)|unclassified	0.000105566	8.37292E-05	9.86312E-05	0.000233495	0.000221366	0.00014921	0.000366037	0.000219803	0.000147877	0.000214824	8.90729E-05	0.000133543
PHOSLIPSYN-PWY: superpathway of phospholipid biosynthesis I (bacteria)|g__Enterobacter.s__Enterobacter_cloacae	0	0	9.69282E-07	0	0	0	0	3.70337E-07	0	0	0	0
PHOSLIPSYN-PWY: superpathway of phospholipid biosynthesis I (bacteria)|g__Escherichia.s__Escherichia_coli	0	2.56973E-07	2.42334E-06	0	1.60787E-06	1.46867E-05	2.4174E-07	1.06296E-05	0	0	0	0.0004577
PHOSLIPSYN-PWY: superpathway of phospholipid biosynthesis I (bacteria)|g__Fusobacterium.s__Fusobacterium_mortiferum	1.74889E-07	0	0	0	0	0	0	0	0	0	0	0
PHOSLIPSYN-PWY: superpathway of phospholipid biosynthesis I (bacteria)|g__Klebsiella.s__Klebsiella_pneumoniae	0	0	0	0	0	0	0	1.89053E-06	0	0	0	0
PHOSLIPSYN-PWY: superpathway of phospholipid biosynthesis I (bacteria)|g__Shigella.s__Shigella_flexneri	0	0	0	0	0	0	0	0	0	0	0	2.18767E-07
PHOSLIPSYN-PWY: superpathway of phospholipid biosynthesis I (bacteria)|unclassified	0	0	0	1.3958E-05	0	0	0	0	6.29384E-06	0	0	0
POLYAMINSYN3-PWY: superpathway of polyamine biosynthesis II|unclassified	0	0	1.87059E-06	0	0	6.18445E-06	0	0	0	0	0	0
POLYAMSYN-PWY: superpathway of polyamine biosynthesis I|g__Escherichia.s__Escherichia_coli	0	5.71737E-07	1.52411E-06	0	9.59634E-07	1.08647E-05	2.13659E-07	2.64743E-06	0	0	2.16235E-07	1.35802E-07
POLYAMSYN-PWY: superpathway of polyamine biosynthesis I|g__Megamonas.s__Megamonas_hypermegale	1.8815E-05	0	0	0	0	0	0	0	0	0	0	0
POLYAMSYN-PWY: superpathway of polyamine biosynthesis I|g__Megamonas.s__Megamonas_rupellensis	4.34126E-05	0	0	0	0	0	0	0	0	0	0	0
POLYAMSYN-PWY: superpathway of polyamine biosynthesis I|g__Veillonella.s__Veillonella_parvula	0	0	0	0	0	3.61998E-06	0	0	0	7.27851E-07	0	2.44362E-07
POLYAMSYN-PWY: superpathway of polyamine biosynthesis I|unclassified	1.09983E-05	3.60001E-06	1.12746E-05	1.46004E-05	0	1.37291E-05	8.50079E-06	7.38749E-06	7.32531E-06	6.0571E-06	1.43729E-05	1.52885E-05
POLYISOPRENSYN-PWY: polyisoprenoid biosynthesis (E. coli)|g__Escherichia.s__Escherichia_coli	0	4.99995E-07	2.17078E-06	3.84866E-07	9.50191E-07	1.46571E-05	3.33303E-07	6.42353E-06	2.24505E-07	0	5.48951E-07	4.22992E-07
POLYISOPRENSYN-PWY: polyisoprenoid biosynthesis (E. coli)|g__Shigella.s__Shigella_flexneri	0	0	0	0	0	0	0	0	0	0	0	3.61866E-07
PPGPPMET-PWY: ppGpp biosynthesis|g__Enterobacter.s__Enterobacter_cloacae	0	0	5.76754E-07	0	0	7.39054E-08	0	5.18096E-07	0	0	0	0
PPGPPMET-PWY: ppGpp biosynthesis|g__Klebsiella.s__Klebsiella_pneumoniae	0	0	0	0	0	3.85324E-07	0	1.66604E-06	0	0	0	0
PPGPPMET-PWY: ppGpp biosynthesis|unclassified	0	4.78819E-06	1.90307E-05	3.76473E-06	0	6.18628E-08	0	2.25734E-05	1.43547E-06	5.74246E-07	0	2.56185E-06
PROTOCATECHUATE-ORTHO-CLEAVAGE-PWY: protocatechuate degradation II (ortho-cleavage pathway)|g__Klebsiella.s__Klebsiella_pneumoniae	0	0	0	0	0	2.14909E-07	0	1.60217E-06	0	0	0	0
PRPP-PWY: superpathway of histidine, purine, and pyrimidine biosynthesis|unclassified	0	7.84647E-06	3.35932E-05	1.17298E-05	0	8.5887E-06	7.28407E-06	0	4.40235E-05	3.56092E-05	0	0
PWY-1042: glycolysis IV (plant cytosol)|g__Akkermansia.s__Akkermansia_muciniphila	1.07627E-05	2.97915E-06	0	4.38257E-07	0	4.25447E-07	2.1247E-06	9.41266E-05	1.44252E-06	7.17098E-06	0	2.47192E-06
PWY-1042: glycolysis IV (plant cytosol)|g__Alistipes.s__Alistipes_senegalensis	6.69842E-07	0	0	0	0	0	2.80912E-07	2.63737E-07	0	9.69152E-07	0	0
PWY-1042: glycolysis IV (plant cytosol)|g__Alistipes.s__Alistipes_shahii	3.8984E-06	0	0	4.25291E-06	0	1.43062E-05	0	2.61938E-05	1.12179E-05	2.75153E-05	0	0
PWY-1042: glycolysis IV (plant cytosol)|g__Anaerostipes.s__Anaerostipes_hadrus	1.0209E-05	4.78275E-06	2.61794E-05	2.78075E-05	0	3.80729E-07	6.10149E-06	5.96747E-07	0	3.62661E-06	0	8.41524E-06
PWY-1042: glycolysis IV (plant cytosol)|g__Bacteroides.s__Bacteroides_caccae	3.66235E-06	0	0	0	0	0	1.9363E-06	3.01259E-06	3.88961E-06	1.0568E-05	0	0
PWY-1042: glycolysis IV (plant cytosol)|g__Bacteroides.s__Bacteroides_faecis	0	0	1.85816E-05	0	0	0	0	0	4.46097E-06	1.20878E-05	0	0
PWY-1042: glycolysis IV (plant cytosol)|g__Bacteroides.s__Bacteroides_finegoldii	1.52002E-06	7.54426E-06	0.002695	0	0	0	0	0	1.81265E-06	6.18849E-06	0	0
PWY-1042: glycolysis IV (plant cytosol)|g__Bacteroides.s__Bacteroides_ovatus	4.94083E-06	5.23425E-05	2.22073E-05	1.24419E-06	0	1.95406E-06	2.02623E-06	2.58288E-06	7.33348E-06	8.15599E-06	8.21194E-05	2.93231E-05
PWY-1042: glycolysis IV (plant cytosol)|g__Bacteroides.s__Bacteroides_sp_2_1_22	0	0	0	0	0	0	0	0	3.91661E-07	6.44255E-07	0	0
PWY-1042: glycolysis IV (plant cytosol)|g__Bacteroides.s__Bacteroides_thetaiotaomicron	3.79931E-06	0	2.72931E-06	0	0	1.66658E-05	1.91048E-06	2.07049E-06	0	0	6.7602E-06	9.72634E-06
PWY-1042: glycolysis IV (plant cytosol)|g__Bacteroides.s__Bacteroides_xylanisolvens	0	0	1.62562E-05	5.24996E-07	0	3.97539E-06	1.53933E-05	2.27241E-06	0	8.90464E-07	0	0
PWY-1042: glycolysis IV (plant cytosol)|g__Barnesiella.s__Barnesiella_intestinihominis	4.38704E-06	0	1.63816E-05	3.74876E-06	0	0	3.43356E-06	4.08078E-06	0	0	0	0
PWY-1042: glycolysis IV (plant cytosol)|g__Blautia.s__Ruminococcus_obeum	0	0	0	0	3.74437E-07	0	1.43867E-06	1.18204E-05	0	1.09449E-06	0	0
PWY-1042: glycolysis IV (plant cytosol)|g__Blautia.s__Ruminococcus_torques	3.77947E-05	2.98622E-05	6.62063E-06	9.76136E-06	3.70572E-05	2.12253E-05	7.63074E-06	1.8413E-05	1.69985E-06	3.20121E-06	4.80544E-06	0
PWY-1042: glycolysis IV (plant cytosol)|g__Clostridium.s__Clostridium_bolteae	0	0	0	0	0	0	0	5.66306E-07	0	0	0	0
PWY-1042: glycolysis IV (plant cytosol)|g__Clostridium.s__Clostridium_perfringens	0	0	0	0	0	3.7E-07	0	4.30492E-07	0	0	0	0
PWY-1042: glycolysis IV (plant cytosol)|g__Coprococcus.s__Coprococcus_catus	1.77721E-06	2.43281E-06	0	2.60117E-06	2.10065E-06	8.2402E-07	1.21351E-06	1.37179E-06	8.01432E-07	1.38061E-06	0	0
PWY-1042: glycolysis IV (plant cytosol)|g__Desulfovibrio.s__Desulfovibrio_piger	9.57549E-06	0	0	0	0	0	0	0	0	0	0	0
PWY-1042: glycolysis IV (plant cytosol)|g__Eggerthella.s__Eggerthella_lenta	3.12201E-07	0	0	0	0	0	0	0	0	0	0	0
PWY-1042: glycolysis IV (plant cytosol)|g__Escherichia.s__Escherichia_coli	0	1.73289E-06	3.75907E-06	4.31595E-07	0.002032	2.57067E-05	3.93627E-07	1.07054E-05	1.95282E-07	0	4.78301E-07	7.11372E-07
PWY-1042: glycolysis IV (plant cytosol)|g__Faecalibacterium.s__Faecalibacterium_prausnitzii	7.73713E-05	7.40039E-07	9.27358E-05	3.10385E-05	0.000254607	3.95406E-05	4.84556E-05	2.33945E-05	6.13557E-05	3.15668E-05	1.83763E-06	3.90345E-05
PWY-1042: glycolysis IV (plant cytosol)|g__Fusobacterium.s__Fusobacterium_mortiferum	4.96477E-07	0	0	0	0	0	0	0	0	0	0	0
PWY-1042: glycolysis IV (plant cytosol)|g__Haemophilus.s__Haemophilus_parainfluenzae	0	0	0	0	0	6.08282E-07	0	1.32984E-07	0	1.24435E-06	0	0
PWY-1042: glycolysis IV (plant cytosol)|g__Holdemania.s__Holdemania_filiformis	2.08166E-07	0	0	0	0	0	0	0	0	0	0	0
PWY-1042: glycolysis IV (plant cytosol)|g__Klebsiella.s__Klebsiella_pneumoniae	0	0	0	0	0	1.83092E-07	0	1.55932E-06	0	0	0	0
PWY-1042: glycolysis IV (plant cytosol)|g__Lachnospiraceae_noname.s__Lachnospiraceae_bacterium_1_1_57FAA	0	0	1.41389E-06	0	0	0	0	0	0	0	0	0
PWY-1042: glycolysis IV (plant cytosol)|g__Lachnospiraceae_noname.s__Lachnospiraceae_bacterium_3_1_46FAA	0	0	1.56145E-06	1.30999E-05	0	0	9.34145E-07	2.3502E-07	1.41684E-06	0	0	0
PWY-1042: glycolysis IV (plant cytosol)|g__Lachnospiraceae_noname.s__Lachnospiraceae_bacterium_5_1_63FAA	1.09962E-05	0	3.72471E-05	1.63607E-05	0	1.25718E-06	4.34009E-06	8.31616E-07	0	6.69753E-06	0	1.04117E-05
PWY-1042: glycolysis IV (plant cytosol)|g__Lactococcus.s__Lactococcus_lactis	0	0	0	0	3.01266E-07	0	0	0	0	0	0	8.02247E-07
PWY-1042: glycolysis IV (plant cytosol)|g__Megamonas.s__Megamonas_rupellensis	3.53251E-05	0	0	0	0	0	0	0	0	0	0	0
PWY-1042: glycolysis IV (plant cytosol)|g__Odoribacter.s__Odoribacter_splanchnicus	3.33237E-06	0	5.46285E-06	0	0	4.11599E-06	1.29273E-06	1.75528E-06	2.65563E-06	9.05677E-06	0	0
PWY-1042: glycolysis IV (plant cytosol)|g__Peptostreptococcaceae_noname.s__Clostridium_bartlettii	0	0	2.72162E-07	0	0	0	0	0	0	0	0	0
PWY-1042: glycolysis IV (plant cytosol)|g__Ruminococcus.s__Ruminococcus_bromii	3.20929E-05	0.000137455	0	5.79382E-05	3.66232E-05	0	2.89205E-05	2.14969E-06	2.82664E-05	1.32879E-05	0	0
PWY-1042: glycolysis IV (plant cytosol)|g__Shigella.s__Shigella_flexneri	0	0	0	0	0	0	0	0	0	0	0	5.43513E-07
PWY-1042: glycolysis IV (plant cytosol)|g__Streptococcus.s__Streptococcus_australis	0	4.85246E-07	5.24823E-07	0	0	0	0	4.6603E-07	0	0	1.81271E-07	2.31268E-07
PWY-1042: glycolysis IV (plant cytosol)|g__Streptococcus.s__Streptococcus_infantis	0	9.3742E-07	0	0	0	1.47808E-07	0	6.36639E-07	0	0	0	8.04674E-07
PWY-1042: glycolysis IV (plant cytosol)|g__Streptococcus.s__Streptococcus_mitis_oralis_pneumoniae	0	9.58307E-07	3.0562E-07	1.84256E-07	0	4.11093E-07	0	5.57725E-07	0	0	0	0
[truncated: 3,464 more rows]

## Sheet: Stratified data Palleja 2016
Table S3g: Metagenomic stratified relative abundance resulting for the data generated from Palleja et al., 2016.
[truncated: 5,876 more rows]

[truncated: 1 more sheets: Stratified Tremaroli 2015]
