# Supplementary material for: Cross-Regional View of Functional and Taxonomic Microbiota Composition in Obesity and Post-obesity Treatment Shows Country Specific Microbial Contribution
Source: Front Microbiol. 2019 Oct 17;10:2346. doi: 10.3389/fmicb.2019.02346 (PMC6812679; doi:10.3389/fmicb.2019.02346)
Supplement: Supplementary file 4 [file Table_4.xlsx]

## Sheet: stratified GB changes
Table S4: Gastric Bypass metagenomic stratified changes.
Pathways	Time0.mean	Time6.mean	M (log2 fold change)	A (Log2 Abundance mean)
PWY-7197: pyrimidine deoxyribonucleotide phosphorylation|g__Akkermansia.s__Akkermansia_muciniphila	7.4895e-05	0.0292411	8.60891	-9.40032
PWY-7111: pyruvate fermentation to isobutanol (engineered)|g__Bacteroides.s__Bacteroides_vulgatus	1.68494e-05	0.00650982	8.59377	-11.5601
VALSYN-PWY: L-valine biosynthesis|g__Bacteroides.s__Bacteroides_vulgatus	1.68494e-05	0.00650982	8.59377	-11.5601
PWY-4242: pantothenate and coenzyme A biosynthesis III|g__Akkermansia.s__Akkermansia_muciniphila	6.78796e-05	0.0244928	8.49517	-9.59908
COMPLETE-ARO-PWY: superpathway of aromatic amino acid biosynthesis|g__Akkermansia.s__Akkermansia_muciniphila	8.249e-05	0.0286826	8.44174	-9.34455
PANTOSYN-PWY: pantothenate and coenzyme A biosynthesis I|g__Akkermansia.s__Akkermansia_muciniphila	8.09326e-05	0.0277456	8.42132	-9.38226
ARO-PWY: chorismate biosynthesis I|g__Akkermansia.s__Akkermansia_muciniphila	7.73849e-05	0.0250258	8.33715	-9.48902
PWY-6163: chorismate biosynthesis from 3-dehydroquinate|g__Akkermansia.s__Akkermansia_muciniphila	6.67816e-05	0.0204193	8.25627	-9.74205
1CMET2-PWY: N10-formyl-tetrahydrofolate biosynthesis|g__Akkermansia.s__Akkermansia_muciniphila	8.35786e-05	0.0248075	8.21343	-9.43979
PWY-5686: UMP biosynthesis|g__Akkermansia.s__Akkermansia_muciniphila	0.000100161	0.0290192	8.17854	-9.19612
PWY-6151: S-adenosyl-L-methionine cycle I|g__Bacteroides.s__Bacteroides_vulgatus	4.36538e-05	0.0118686	8.08683	-10.4401
PWY-2942: L-lysine biosynthesis III|g__Akkermansia.s__Akkermansia_muciniphila	9.79208e-05	0.0242554	7.95248	-9.34179
PWY0-1586: peptidoglycan maturation (meso-diaminopimelate containing)|g__Akkermansia.s__Akkermansia_muciniphila	0.000153435	0.0373674	7.92801	-8.70608
COA-PWY-1: coenzyme A biosynthesis II (mammalian)|g__Akkermansia.s__Akkermansia_muciniphila	0.000109415	0.0259222	7.88823	-9.21378
PWY-6122: 5-aminoimidazole ribonucleotide biosynthesis II|g__Streptococcus.s__Streptococcus_salivarius	1.83929e-05	0.00344547	7.54941	-11.9558
PWY-6277: superpathway of 5-aminoimidazole ribonucleotide biosynthesis|g__Streptococcus.s__Streptococcus_salivarius	1.83929e-05	0.00344547	7.54941	-11.9558
PWY-5097: L-lysine biosynthesis VI|g__Bacteroides.s__Bacteroides_vulgatus	3.85691e-05	0.00714811	7.53397	-10.8952
PWY-6121: 5-aminoimidazole ribonucleotide biosynthesis I|g__Streptococcus.s__Streptococcus_salivarius	1.88719e-05	0.00343178	7.50657	-11.9401
PWY-7208: superpathway of pyrimidine nucleobases salvage|g__Akkermansia.s__Akkermansia_muciniphila	0.000154456	0.0280812	7.50626	-8.90739
PWY-6121: 5-aminoimidazole ribonucleotide biosynthesis I|g__Akkermansia.s__Akkermansia_muciniphila	0.000156338	0.0284086	7.50552	-8.89029
PWY-7228: superpathway of guanosine nucleotides de novo biosynthesis I|g__Bacteroides.s__Bacteroides_vulgatus	6.38607e-05	0.0114733	7.48914	-10.1901
PWY-5188: tetrapyrrole biosynthesis I (from glutamate)|g__Akkermansia.s__Akkermansia_muciniphila	6.58492e-05	0.0115302	7.45203	-10.1645
PWY-6387: UDP-N-acetylmuramoyl-pentapeptide biosynthesis I (meso-diaminopimelate containing)|g__Bacteroides.s__Bacteroides_vulgatus	5.7294e-05	0.00998659	7.44547	-10.3685
PWY-6703: preQ0 biosynthesis|g__Bacteroides.s__Bacteroides_vulgatus	6.96843e-05	0.0109986	7.30227	-10.1577
PEPTIDOGLYCANSYN-PWY: peptidoglycan biosynthesis I (meso-diaminopimelate containing)|g__Bacteroides.s__Bacteroides_vulgatus	6.49431e-05	0.0100586	7.27504	-10.2729
PWY-7220: adenosine deoxyribonucleotides de novo biosynthesis II|g__Bacteroides.s__Bacteroides_vulgatus	6.08637e-05	0.00927886	7.25222	-10.3779
PWY-7222: guanosine deoxyribonucleotides de novo biosynthesis II|g__Bacteroides.s__Bacteroides_vulgatus	6.08637e-05	0.00927886	7.25222	-10.3779
NONMEVIPP-PWY: methylerythritol phosphate pathway I|g__Bacteroides.s__Bacteroides_vulgatus	7.55855e-05	0.0115171	7.25146	-10.0658
PWY-3841: folate transformations II|g__Bacteroides.s__Bacteroides_vulgatus	5.69718e-05	0.00820419	7.16997	-10.5144
PWY-7221: guanosine ribonucleotides de novo biosynthesis|g__Streptococcus.s__Streptococcus_salivarius	2.78558e-05	0.0039794	7.15843	-11.5524
PWY-6125: superpathway of guanosine nucleotides de novo biosynthesis II|g__Bacteroides.s__Bacteroides_vulgatus	7.24679e-05	0.010183	7.1346	-10.185
VALSYN-PWY: L-valine biosynthesis|g__Streptococcus.s__Streptococcus_salivarius	2.58878e-05	0.00355358	7.10086	-11.6869
PWY-6126: superpathway of adenosine nucleotides de novo biosynthesis II|g__Bacteroides.s__Bacteroides_vulgatus	8.75092e-05	0.0117529	7.06937	-9.94552
PWY-7221: guanosine ribonucleotides de novo biosynthesis|g__Bacteroides.s__Bacteroides_vulgatus	9.96893e-05	0.0128661	7.01192	-9.78624
PANTO-PWY: phosphopantothenate biosynthesis I|g__Akkermansia.s__Akkermansia_muciniphila	0.000107185	0.0136399	6.99158	-9.69181
PANTO-PWY: phosphopantothenate biosynthesis I|g__Bacteroides.s__Bacteroides_vulgatus	6.61641e-05	0.00840669	6.98935	-10.3889
PWY-7229: superpathway of adenosine nucleotides de novo biosynthesis I|g__Bacteroides.s__Bacteroides_vulgatus	0.000109756	0.0131892	6.90891	-9.69896
PWY-6700: queuosine biosynthesis|g__Akkermansia.s__Akkermansia_muciniphila	0.00018807	0.0214899	6.83625	-8.95832
PWY-6609: adenine and adenosine salvage III|g__Escherichia.s__Escherichia_coli	0.00011036	0.0107663	6.60816	-9.84141
ILEUSYN-PWY: L-isoleucine biosynthesis I (from threonine)|g__Akkermansia.s__Akkermansia_muciniphila	0.000165041	0.0160282	6.60164	-9.26406
VALSYN-PWY: L-valine biosynthesis|g__Akkermansia.s__Akkermansia_muciniphila	0.000165041	0.0160282	6.60164	-9.26406
PWY-6151: S-adenosyl-L-methionine cycle I|g__Streptococcus.s__Streptococcus_salivarius	3.02563e-05	0.00287908	6.57222	-11.7263
UNINTEGRATED|g__Akkermansia.s__Akkermansia_muciniphila	0.119992	11.383	6.5678	0.224916
COA-PWY-1: coenzyme A biosynthesis II (mammalian)|g__Bacteroides.s__Bacteroides_vulgatus	0.000108179	0.00959854	6.47132	-9.93863
PWY-7219: adenosine ribonucleotides de novo biosynthesis|g__Streptococcus.s__Streptococcus_salivarius	3.81176e-05	0.00334579	6.45574	-11.4513
PWY-5103: L-isoleucine biosynthesis III|g__Akkermansia.s__Akkermansia_muciniphila	0.000145091	0.0126864	6.45017	-9.52566
PWY-7409: phospholipid remodeling (phosphatidylethanolamine. yeast)|g__Escherichia.s__Escherichia_coli	6.35531e-05	0.00540548	6.41032	-10.7365
PWY-1269: CMP-3-deoxy-D-manno-octulosonate biosynthesis I|g__Akkermansia.s__Akkermansia_muciniphila	0.000155549	0.0131301	6.39936	-9.45066
BRANCHED-CHAIN-AA-SYN-PWY: superpathway of branched amino acid biosynthesis|g__Akkermansia.s__Akkermansia_muciniphila	0.000163466	0.0137692	6.39631	-9.38056
PWY-7111: pyruvate fermentation to isobutanol (engineered)|g__Streptococcus.s__Streptococcus_salivarius	3.76624e-05	0.00304665	6.33795	-11.5275
COA-PWY: coenzyme A biosynthesis I|g__Akkermansia.s__Akkermansia_muciniphila	0.000198804	0.0154285	6.27811	-9.15731
PWY-7219: adenosine ribonucleotides de novo biosynthesis|g__Bacteroides.s__Bacteroides_vulgatus	0.000183913	0.014261	6.2769	-9.27024
PWY-7111: pyruvate fermentation to isobutanol (engineered)|g__Akkermansia.s__Akkermansia_muciniphila	0.000153834	0.0117379	6.25366	-9.53951
PWY-6124: inosine-5'-phosphate biosynthesis II|g__Streptococcus.s__Streptococcus_salivarius	4.666e-05	0.00350182	6.22977	-11.2726
PWY0-1297: superpathway of purine deoxyribonucleosides degradation|g__Escherichia.s__Escherichia_coli	7.15927e-05	0.00528459	6.20584	-10.6669
PWY-7228: superpathway of guanosine nucleotides de novo biosynthesis I|g__Akkermansia.s__Akkermansia_muciniphila	0.000212046	0.01531	6.17395	-9.11636
PWY-7208: superpathway of pyrimidine nucleobases salvage|g__Eubacterium.s__Eubacterium_siraeum	0.000211743	0.0152119	6.16675	-9.12203
PWY-6123: inosine-5'-phosphate biosynthesis I|g__Streptococcus.s__Streptococcus_salivarius	4.31417e-05	0.00308077	6.15807	-11.4215
PWY-7323: superpathway of GDP-mannose-derived O-antigen building blocks biosynthesis|g__Escherichia.s__Escherichia_coli	1.93119e-05	0.00136997	6.14851	-12.5859
PWY0-1296: purine ribonucleosides degradation|g__Escherichia.s__Escherichia_coli	7.25237e-05	0.00510903	6.13845	-10.682
PWY-6122: 5-aminoimidazole ribonucleotide biosynthesis II|g__Akkermansia.s__Akkermansia_muciniphila	0.000432078	0.0300594	6.12038	-8.11623
PWY-6277: superpathway of 5-aminoimidazole ribonucleotide biosynthesis|g__Akkermansia.s__Akkermansia_muciniphila	0.000432078	0.0300594	6.12038	-8.11623
PWY-5695: urate biosynthesis/inosine 5'-phosphate degradation|g__Bacteroides.s__Bacteroides_vulgatus	0.000122257	0.0083036	6.08575	-9.95492
PWY-6703: preQ0 biosynthesis|g__Escherichia.s__Escherichia_coli	5.51692e-05	0.00374609	6.08538	-11.1031
P461-PWY: hexitol fermentation to lactate. formate. ethanol and acetate|g__Escherichia.s__Escherichia_coli	0.00016097	0.010616	6.0433	-9.57927
PWY0-1586: peptidoglycan maturation (meso-diaminopimelate containing)|g__Escherichia.s__Escherichia_coli	0.00041266	0.0253699	5.94202	-8.27175
PWY-1042: glycolysis IV (plant cytosol)|g__Akkermansia.s__Akkermansia_muciniphila	0.000346918	0.0203026	5.87092	-8.55765
SO4ASSIM-PWY: sulfate reduction I (assimilatory)|g__Escherichia.s__Escherichia_coli	0.000114234	0.0064639	5.82234	-10.1845
PWY-6737: starch degradation V|g__Akkermansia.s__Akkermansia_muciniphila	0.000239867	0.0134326	5.80736	-9.1218
PWY-7357: thiamin formation from pyrithiamine and oxythiamine (yeast)|g__Escherichia.s__Escherichia_coli	4.7416e-05	0.00265292	5.80606	-11.4612
PWY-4702: phytate degradation I|g__Akkermansia.s__Akkermansia_muciniphila	0.000191525	0.0106377	5.79551	-9.45242
VALSYN-PWY: L-valine biosynthesis|g__Escherichia.s__Escherichia_coli	0.000142852	0.00756362	5.72648	-9.90995
NONOXIPENT-PWY: pentose phosphate pathway (non-oxidative branch)|g__Eubacterium.s__Eubacterium_siraeum	0.000570274	0.0300909	5.72153	-7.91529
AST-PWY: L-arginine degradation II (AST pathway)|g__Escherichia.s__Escherichia_coli	3.53606e-05	0.00185509	5.7132	-11.9309
PWY0-1261: anhydromuropeptides recycling|g__Escherichia.s__Escherichia_coli	0.000245465	0.0126393	5.68625	-9.14907
PWY-6147: 6-hydroxymethyl-dihydropterin diphosphate biosynthesis I|g__Escherichia.s__Escherichia_coli	7.12033e-05	0.00360021	5.66	-10.9477
PWY-5384: sucrose degradation IV (sucrose phosphorylase)|g__Escherichia.s__Escherichia_coli	6.53823e-05	0.0032955	5.65545	-11.073
PWY-7357: thiamin formation from pyrithiamine and oxythiamine (yeast)|g__Eubacterium.s__Eubacterium_siraeum	0.000313062	0.0154914	5.62888	-8.82683
PWY-5667: CDP-diacylglycerol biosynthesis I|g__Eubacterium.s__Eubacterium_siraeum	0.000170832	0.00840679	5.62091	-9.70468
PWY0-1319: CDP-diacylglycerol biosynthesis II|g__Eubacterium.s__Eubacterium_siraeum	0.000170832	0.00840679	5.62091	-9.70468
PWY-7219: adenosine ribonucleotides de novo biosynthesis|g__Eubacterium.s__Eubacterium_siraeum	0.000527628	0.025944	5.61973	-8.07832
PWY-1269: CMP-3-deoxy-D-manno-octulosonate biosynthesis I|g__Escherichia.s__Escherichia_coli	0.000174019	0.0084722	5.60542	-9.68576
PWY-7111: pyruvate fermentation to isobutanol (engineered)|g__Escherichia.s__Escherichia_coli	0.000207506	0.010029	5.59488	-9.43712
PWY-6163: chorismate biosynthesis from 3-dehydroquinate|g__Eubacterium.s__Eubacterium_siraeum	0.000356082	0.0170646	5.58266	-8.66418
HISTSYN-PWY: L-histidine biosynthesis|g__Eubacterium.s__Eubacterium_siraeum	0.000328445	0.0157279	5.58153	-8.78129
ARO-PWY: chorismate biosynthesis I|g__Eubacterium.s__Eubacterium_siraeum	0.000418168	0.0194871	5.54229	-8.45248
PWY-6803: phosphatidylcholine acyl editing|g__Escherichia.s__Escherichia_coli	7.69767e-05	0.00356963	5.53521	-10.8976
PWY-6353: purine nucleotides degradation II (aerobic)|g__Escherichia.s__Escherichia_coli	0.000135019	0.00625735	5.53432	-10.0874
GLUCUROCAT-PWY: superpathway of &beta;-D-glucuronide and D-glucuronate degradation|g__Escherichia.s__Escherichia_coli	0.000100988	0.00464698	5.52404	-10.5115
NAD-BIOSYNTHESIS-II: NAD salvage pathway II|g__Escherichia.s__Escherichia_coli	0.000108982	0.00499273	5.51767	-10.4048
COA-PWY-1: coenzyme A biosynthesis II (mammalian)|g__Eubacterium.s__Eubacterium_siraeum	0.00032018	0.0143733	5.48836	-8.86465
PWY-7221: guanosine ribonucleotides de novo biosynthesis|g__Akkermansia.s__Akkermansia_muciniphila	0.000373024	0.0167388	5.48778	-8.64455
PWY-3841: folate transformations II|g__Akkermansia.s__Akkermansia_muciniphila	0.000262235	0.0117604	5.48694	-9.15338
PWY-7242: D-fructuronate degradation|g__Escherichia.s__Escherichia_coli	0.000136021	0.00609207	5.48503	-10.1014
PWY-1042: glycolysis IV (plant cytosol)|g__Escherichia.s__Escherichia_coli	0.000185269	0.00827988	5.48192	-9.65713
PWY-6507: 4-deoxy-L-threo-hex-4-enopyranuronate degradation|g__Escherichia.s__Escherichia_coli	7.46375e-05	0.00331615	5.47347	-10.973
PYRIDNUCSAL-PWY: NAD salvage pathway I|g__Escherichia.s__Escherichia_coli	7.44651e-05	0.00323784	5.44232	-10.9919
ILEUSYN-PWY: L-isoleucine biosynthesis I (from threonine)|g__Eubacterium.s__Eubacterium_siraeum	0.000546665	0.0236743	5.43652	-8.11879
VALSYN-PWY: L-valine biosynthesis|g__Eubacterium.s__Eubacterium_siraeum	0.000546665	0.0236743	5.43652	-8.11879
UNINTEGRATED|g__Bacteroides.s__Bacteroides_vulgatus	0.194913	8.30435	5.41296	0.347386
PANTO-PWY: phosphopantothenate biosynthesis I|g__Escherichia.s__Escherichia_coli	0.000121057	0.00512846	5.40476	-10.3096
PWY-6608: guanosine nucleotides degradation III|g__Escherichia.s__Escherichia_coli	0.000169005	0.00714001	5.40079	-9.83025
PWY-5695: urate biosynthesis/inosine 5'-phosphate degradation|g__Escherichia.s__Escherichia_coli	0.000170782	0.00714001	5.3857	-9.82271
UNINTEGRATED|g__Escherichia.s__Escherichia_coli	0.461739	19.267	5.38291	1.57661
FASYN-INITIAL-PWY: superpathway of fatty acid biosynthesis initiation (E. coli)|g__Escherichia.s__Escherichia_coli	5.09282e-05	0.0020973	5.36392	-11.5792
SALVADEHYPOX-PWY: adenosine nucleotides degradation II|g__Escherichia.s__Escherichia_coli	0.000171391	0.00705624	5.36354	-9.82865
PWY-6703: preQ0 biosynthesis|g__Streptococcus.s__Streptococcus_salivarius	5.21885e-05	0.00213503	5.35438	-11.5487
GALACT-GLUCUROCAT-PWY: superpathway of hexuronide and hexuronate degradation|g__Escherichia.s__Escherichia_coli	8.88682e-05	0.0035947	5.33806	-10.7889
PWY-6527: stachyose degradation|g__Eubacterium.s__Eubacterium_siraeum	0.000504758	0.0203891	5.33606	-8.28409
GALACTUROCAT-PWY: D-galacturonate degradation I|g__Escherichia.s__Escherichia_coli	8.19054e-05	0.00329524	5.33028	-10.9105
PWY-6124: inosine-5'-phosphate biosynthesis II|g__Escherichia.s__Escherichia_coli	8.06975e-05	0.00323074	5.3232	-10.9355
HEMESYN2-PWY: heme biosynthesis II (anaerobic)|g__Escherichia.s__Escherichia_coli	0.000141222	0.00554494	5.29514	-10.1422
THRESYN-PWY: superpathway of L-threonine biosynthesis|g__Escherichia.s__Escherichia_coli	9.09834e-05	0.00354555	5.28426	-10.7819
PWY-5083: NAD/NADH phosphorylation and dephosphorylation|g__Escherichia.s__Escherichia_coli	0.000106573	0.00413653	5.2785	-10.5566
PWY4FS-7: phosphatidylglycerol biosynthesis I (plastidic)|g__Escherichia.s__Escherichia_coli	0.000125042	0.00481635	5.26746	-10.3316
PWY4FS-8: phosphatidylglycerol biosynthesis II (non-plastidic)|g__Escherichia.s__Escherichia_coli	0.000125042	0.00481635	5.26746	-10.3316
PWY-7111: pyruvate fermentation to isobutanol (engineered)|g__Eubacterium.s__Eubacterium_siraeum	0.000510383	0.0192712	5.23872	-8.31677
PWY-5686: UMP biosynthesis|g__Eubacterium.s__Eubacterium_siraeum	0.000514622	0.0193754	5.23457	-8.30692
PWY-6317: galactose degradation I (Leloir pathway)|g__Eubacterium.s__Eubacterium_siraeum	0.000311601	0.011728	5.23411	-9.03096
PWY-5173: superpathway of acetyl-CoA biosynthesis|g__Escherichia.s__Escherichia_coli	3.91839e-05	0.00147181	5.23119	-12.0238
UNINTEGRATED|g__Methanobrevibacter.s__Methanobrevibacter_smithii	0.00970797	0.364621	5.23108	-4.07107
BRANCHED-CHAIN-AA-SYN-PWY: superpathway of branched amino acid biosynthesis|g__Eubacterium.s__Eubacterium_siraeum	0.000525212	0.0196372	5.22454	-8.28254
PWY-4041: &gamma;-glutamyl cycle|g__Escherichia.s__Escherichia_coli	0.000167736	0.00626027	5.22196	-9.93054
PWY-5103: L-isoleucine biosynthesis III|g__Eubacterium.s__Eubacterium_siraeum	0.000512666	0.0187763	5.19475	-8.33232
GLYOXYLATE-BYPASS: glyoxylate cycle|g__Escherichia.s__Escherichia_coli	0.000157416	0.00570267	5.17898	-10.0436
FUC-RHAMCAT-PWY: superpathway of fucose and rhamnose degradation|g__Escherichia.s__Escherichia_coli	0.000130845	0.00473104	5.17623	-10.3117
GLYCOGENSYNTH-PWY: glycogen biosynthesis I (from ADP-D-Glucose)|g__Eubacterium.s__Eubacterium_siraeum	0.0005227	0.0188721	5.17413	-8.31467
RIBOSYN2-PWY: flavin biosynthesis I (bacteria and plants)|g__Escherichia.s__Escherichia_coli	8.60136e-05	0.00309381	5.16867	-10.9207
GLYCOGENSYNTH-PWY: glycogen biosynthesis I (from ADP-D-Glucose)|g__Escherichia.s__Escherichia_coli	4.41083e-05	0.00158243	5.16495	-11.8861
PWY-6168: flavin biosynthesis III (fungi)|g__Escherichia.s__Escherichia_coli	8.42421e-05	0.00298447	5.14679	-10.9617
RHAMCAT-PWY: L-rhamnose degradation I|g__Escherichia.s__Escherichia_coli	0.000127669	0.00451727	5.14497	-10.3628
PWY-7254: TCA cycle VII (acetate-producers)|g__Escherichia.s__Escherichia_coli	9.51471e-05	0.00333247	5.13029	-10.7943
PWY-6123: inosine-5'-phosphate biosynthesis I|g__Escherichia.s__Escherichia_coli	9.31915e-05	0.00324563	5.12216	-10.8284
P105-PWY: TCA cycle IV (2-oxoglutarate decarboxylase)|g__Escherichia.s__Escherichia_coli	0.000200535	0.00698196	5.1217	-9.723
PWY-7221: guanosine ribonucleotides de novo biosynthesis|g__Eubacterium.s__Eubacterium_siraeum	0.000357937	0.0124149	5.11623	-8.8899
PWY-6897: thiamin salvage II|g__Escherichia.s__Escherichia_coli	6.4085e-05	0.00221283	5.10977	-11.3748
PWY-6936: seleno-amino acid biosynthesis|g__Escherichia.s__Escherichia_coli	0.000156035	0.00528383	5.08164	-10.105
TRPSYN-PWY: L-tryptophan biosynthesis|g__Streptococcus.s__Streptococcus_parasanguinis	3.11843e-05	0.00105429	5.07931	-12.4292
ASPASN-PWY: superpathway of L-aspartate and L-asparagine biosynthesis|g__Escherichia.s__Escherichia_coli	0.000275631	0.00931681	5.07902	-9.28546
PWY-1042: glycolysis IV (plant cytosol)|g__Blautia.s__Ruminococcus_obeum	0.000131859	0.00445197	5.07737	-10.35
PWY-5690: TCA cycle II (plants and fungi)|g__Escherichia.s__Escherichia_coli	0.000178567	0.00599159	5.0684	-9.91704
HISTSYN-PWY: L-histidine biosynthesis|g__Escherichia.s__Escherichia_coli	5.89838e-05	0.00197525	5.06557	-11.5165
PWY-6969: TCA cycle V (2-oxoglutarate:ferredoxin oxidoreductase)|g__Escherichia.s__Escherichia_coli	0.000209686	0.00698196	5.05733	-9.69082
SER-GLYSYN-PWY: superpathway of L-serine and glycine biosynthesis I|g__Eubacterium.s__Eubacterium_siraeum	0.000306817	0.0101798	5.05218	-9.14424
SULFATE-CYS-PWY: superpathway of sulfate assimilation and cysteine biosynthesis|g__Escherichia.s__Escherichia_coli	9.96339e-05	0.00327908	5.04051	-10.7727
ENTBACSYN-PWY: enterobactin biosynthesis|g__Escherichia.s__Escherichia_coli	0.000208807	0.00684733	5.0353	-9.70789
PWY-2942: L-lysine biosynthesis III|g__Escherichia.s__Escherichia_coli	4.5158e-05	0.00147601	5.03058	-11.9194
PWY0-1061: superpathway of L-alanine biosynthesis|g__Escherichia.s__Escherichia_coli	0.000199072	0.00648511	5.02577	-9.78154
PWY-7219: adenosine ribonucleotides de novo biosynthesis|g__Akkermansia.s__Akkermansia_muciniphila	0.000536676	0.0174563	5.02355	-8.35188
PWY-6282: palmitoleate biosynthesis I (from (5Z)-dodec-5-enoate)|g__Escherichia.s__Escherichia_coli	0.000125939	0.00409166	5.02189	-10.444
PYRIDNUCSYN-PWY: NAD biosynthesis I (from aspartate)|g__Eubacterium.s__Eubacterium_siraeum	0.000378583	0.0122775	5.01926	-8.85747
ARGSYN-PWY: L-arginine biosynthesis I (via L-ornithine)|g__Eubacterium.s__Eubacterium_siraeum	0.00035148	0.0111646	4.98935	-8.97959
PWY-7400: L-arginine biosynthesis IV (archaebacteria)|g__Eubacterium.s__Eubacterium_siraeum	0.000350182	0.0110806	4.98379	-8.98771
PWY-5659: GDP-mannose biosynthesis|g__Escherichia.s__Escherichia_coli	6.32793e-05	0.00199832	4.98091	-11.4575
PWY-5097: L-lysine biosynthesis VI|g__Escherichia.s__Escherichia_coli	4.8489e-05	0.0015142	4.96475	-11.8496
TCA-GLYOX-BYPASS: superpathway of glyoxylate bypass and TCA|g__Escherichia.s__Escherichia_coli	0.00017629	0.00550263	4.9641	-9.98771
PWY-6151: S-adenosyl-L-methionine cycle I|g__Escherichia.s__Escherichia_coli	7.21781e-05	0.00223964	4.95556	-11.2803
PWY-6737: starch degradation V|g__Streptococcus.s__Streptococcus_parasanguinis	3.281e-05	0.00100628	4.93875	-12.4261
PWY-6122: 5-aminoimidazole ribonucleotide biosynthesis II|g__Methanobrevibacter.s__Methanobrevibacter_smithii	2.68557e-05	0.000821203	4.93444	-12.7172
PWY-6277: superpathway of 5-aminoimidazole ribonucleotide biosynthesis|g__Methanobrevibacter.s__Methanobrevibacter_smithii	2.68557e-05	0.000821203	4.93444	-12.7172
PWY-7219: adenosine ribonucleotides de novo biosynthesis|g__Escherichia.s__Escherichia_coli	0.000156341	0.00477137	4.93164	-10.1772
ILEUSYN-PWY: L-isoleucine biosynthesis I (from threonine)|g__Escherichia.s__Escherichia_coli	0.000248428	0.00756362	4.92818	-9.5108
PWY-7663: gondoate biosynthesis (anaerobic)|g__Escherichia.s__Escherichia_coli	0.000166936	0.0050217	4.91081	-10.093
PWY-6519: 8-amino-7-oxononanoate biosynthesis I|g__Escherichia.s__Escherichia_coli	0.000127977	0.00382768	4.90252	-10.4806
PWY-6737: starch degradation V|g__Eubacterium.s__Eubacterium_siraeum	0.000724973	0.0216449	4.89995	-7.97981
ARGSYNBSUB-PWY: L-arginine biosynthesis II (acetyl cycle)|g__Eubacterium.s__Eubacterium_siraeum	0.00040368	0.0119123	4.88309	-8.83295
PWY-6305: putrescine biosynthesis IV|g__Escherichia.s__Escherichia_coli	6.93885e-05	0.00204454	4.88094	-11.3745
POLYISOPRENSYN-PWY: polyisoprenoid biosynthesis (E. coli)|g__Escherichia.s__Escherichia_coli	8.65422e-05	0.00254569	4.87851	-11.057
PWY-7388: octanoyl-[acyl-carrier protein] biosynthesis (mitochondria. yeast)|g__Escherichia.s__Escherichia_coli	9.77176e-05	0.00287321	4.8779	-10.8821
PWY-6123: inosine-5'-phosphate biosynthesis I|g__Eubacterium.s__Eubacterium_siraeum	0.000383785	0.0112716	4.87625	-8.90929
FASYN-ELONG-PWY: fatty acid elongation -- saturated|g__Escherichia.s__Escherichia_coli	0.000150666	0.00440971	4.87126	-10.2607
BIOTIN-BIOSYNTHESIS-PWY: biotin biosynthesis I|g__Escherichia.s__Escherichia_coli	0.000133717	0.00390192	4.86693	-10.4351
GLCMANNANAUT-PWY: superpathway of N-acetylglucosamine. N-acetylmannosamine and N-acetylneuraminate degradation|g__Escherichia.s__Escherichia_coli	0.000111672	0.00324866	4.86251	-10.6972
PWY-6121: 5-aminoimidazole ribonucleotide biosynthesis I|g__Methanobrevibacter.s__Methanobrevibacter_smithii	2.114e-05	0.0006144	4.86113	-13.0991
PWY-5198: factor 420 biosynthesis|g__Methanobrevibacter.s__Methanobrevibacter_smithii	2.93189e-05	0.000850838	4.85898	-12.6283
PWY-6859: all-trans-farnesol biosynthesis|g__Escherichia.s__Escherichia_coli	7.18478e-05	0.00207588	4.85263	-11.3384
PWY-4702: phytate degradation I|g__Escherichia.s__Escherichia_coli	6.90376e-05	0.00198781	4.84765	-11.3984
PWY-5791: 1.4-dihydroxy-2-naphthoate biosynthesis II (plants)|g__Escherichia.s__Escherichia_coli	9.30624e-05	0.00266158	4.83794	-10.9725
PWY-5837: 1.4-dihydroxy-2-naphthoate biosynthesis I|g__Escherichia.s__Escherichia_coli	9.30624e-05	0.00266158	4.83794	-10.9725
PWY-7199: pyrimidine deoxyribonucleosides salvage|g__Escherichia.s__Escherichia_coli	6.22962e-05	0.0017814	4.83772	-11.5516
PWY-2942: L-lysine biosynthesis III|g__Eubacterium.s__Eubacterium_siraeum	0.000441647	0.0124777	4.82031	-8.73466
COMPLETE-ARO-PWY: superpathway of aromatic amino acid biosynthesis|g__Escherichia.s__Escherichia_coli	0.000128101	0.00360485	4.81459	-10.5231
PWY66-400: glycolysis VI (metazoan)|g__Escherichia.s__Escherichia_coli	0.000115505	0.00324816	4.8136	-10.673
PWY-7664: oleate biosynthesis IV (anaerobic)|g__Escherichia.s__Escherichia_coli	0.000162046	0.00454515	4.80985	-10.1864
PWY-5659: GDP-mannose biosynthesis|g__Eubacterium.s__Eubacterium_siraeum	0.000332465	0.00927382	4.80189	-9.15357
PWY-5097: L-lysine biosynthesis VI|g__Eubacterium.s__Eubacterium_siraeum	0.000465277	0.0127783	4.77947	-8.67989
METHGLYUT-PWY: superpathway of methylglyoxal degradation|g__Escherichia.s__Escherichia_coli	7.33854e-05	0.00201244	4.77731	-11.3455
PWY-5989: stearate biosynthesis II (bacteria and plants)|g__Escherichia.s__Escherichia_coli	0.00011603	0.00315724	4.76609	-10.6902
TCA: TCA cycle I (prokaryotic)|g__Escherichia.s__Escherichia_coli	0.000217018	0.00589666	4.76401	-9.78789
ARO-PWY: chorismate biosynthesis I|g__Escherichia.s__Escherichia_coli	0.000115173	0.00312332	4.76121	-10.7033
GLYCOLYSIS-TCA-GLYOX-BYPASS: superpathway of glycolysis. pyruvate dehydrogenase. TCA. and glyoxylate bypass|g__Escherichia.s__Escherichia_coli	0.000133314	0.00355568	4.73722	-10.5043
SER-GLYSYN-PWY: superpathway of L-serine and glycine biosynthesis I|g__Escherichia.s__Escherichia_coli	6.67454e-05	0.00177081	4.7296	-11.5062
PWY-6612: superpathway of tetrahydrofolate biosynthesis|g__Escherichia.s__Escherichia_coli	6.7546e-05	0.00178757	4.72599	-11.4908
PWY-6124: inosine-5'-phosphate biosynthesis II|g__Eubacterium.s__Eubacterium_siraeum	0.000393138	0.0103777	4.7223	-8.95152
PWY-6163: chorismate biosynthesis from 3-dehydroquinate|g__Escherichia.s__Escherichia_coli	9.5814e-05	0.00252322	4.71888	-10.99
PWY-6628: superpathway of L-phenylalanine biosynthesis|g__Escherichia.s__Escherichia_coli	0.000108805	0.00286224	4.71734	-10.8073
ANAGLYCOLYSIS-PWY: glycolysis III (from glucose)|g__Escherichia.s__Escherichia_coli	0.00012321	0.00323621	4.71511	-10.629
PEPTIDOGLYCANSYN-PWY: peptidoglycan biosynthesis I (meso-diaminopimelate containing)|g__Escherichia.s__Escherichia_coli	9.12569e-05	0.0023635	4.69485	-11.0723
VALSYN-PWY: L-valine biosynthesis|g__Methanobrevibacter.s__Methanobrevibacter_smithii	2.98672e-05	0.000769535	4.68735	-12.6874
GLUTORN-PWY: L-ornithine biosynthesis|g__Eubacterium.s__Eubacterium_siraeum	0.000439932	0.0112104	4.67142	-8.81472
COLANSYN-PWY: colanic acid building blocks biosynthesis|g__Escherichia.s__Escherichia_coli	6.14663e-05	0.0015593	4.66496	-11.6574
PWY66-422: D-galactose degradation V (Leloir pathway)|g__Eubacterium.s__Eubacterium_siraeum	0.000517208	0.013093	4.6619	-8.58602
PWY-7111: pyruvate fermentation to isobutanol (engineered)|g__Methanobrevibacter.s__Methanobrevibacter_smithii	2.98672e-05	0.000753842	4.65763	-12.7023
PHOSLIPSYN-PWY: superpathway of phospholipid biosynthesis I (bacteria)|g__Escherichia.s__Escherichia_coli	0.000141219	0.00354738	4.65075	-10.4644
PWY-6629: superpathway of L-tryptophan biosynthesis|g__Escherichia.s__Escherichia_coli	8.59435e-05	0.0021349	4.63464	-11.1889
COA-PWY-1: coenzyme A biosynthesis II (mammalian)|g__Escherichia.s__Escherichia_coli	0.000127924	0.00317284	4.63242	-10.6162
PWY-6385: peptidoglycan biosynthesis III (mycobacteria)|g__Escherichia.s__Escherichia_coli	9.85344e-05	0.00243811	4.62899	-10.9945
PWY-2723: trehalose degradation V|g__Escherichia.s__Escherichia_coli	4.10646e-05	0.00101494	4.62736	-12.2581
PWY-6737: starch degradation V|g__Escherichia.s__Escherichia_coli	3.81899e-05	0.000938728	4.61945	-12.3667
PWY-6122: 5-aminoimidazole ribonucleotide biosynthesis II|g__Eubacterium.s__Eubacterium_siraeum	0.000652694	0.0159383	4.60994	-8.27633
PWY-6277: superpathway of 5-aminoimidazole ribonucleotide biosynthesis|g__Eubacterium.s__Eubacterium_siraeum	0.000652694	0.0159383	4.60994	-8.27633
PWY-6121: 5-aminoimidazole ribonucleotide biosynthesis I|g__Eubacterium.s__Eubacterium_siraeum	0.000555844	0.0135082	4.60302	-8.51153
PWY-7456: mannan degradation|g__Eubacterium.s__Eubacterium_siraeum	0.000508241	0.012349	4.60273	-8.64083
PWY-7234: inosine-5'-phosphate biosynthesis III|g__Escherichia.s__Escherichia_coli	9.31915e-05	0.00226272	4.60171	-11.0886
PWY0-1241: ADP-L-glycero-&beta;-D-manno-heptose biosynthesis|g__Escherichia.s__Escherichia_coli	0.000107485	0.00260141	4.59708	-10.885
PWY-6630: superpathway of L-tyrosine biosynthesis|g__Escherichia.s__Escherichia_coli	9.45245e-05	0.0022611	4.58019	-11.0789
GLYCOLYSIS-E-D: superpathway of glycolysis and Entner-Doudoroff|g__Escherichia.s__Escherichia_coli	0.000110275	0.0026111	4.56549	-10.8639
PWY-5861: superpathway of demethylmenaquinol-8 biosynthesis|g__Escherichia.s__Escherichia_coli	0.000104742	0.00244696	4.54608	-10.9478
PWY-4242: pantothenate and coenzyme A biosynthesis III|g__Escherichia.s__Escherichia_coli	9.11347e-05	0.00211836	4.5388	-11.1522
DAPLYSINESYN-PWY: L-lysine biosynthesis I|g__Escherichia.s__Escherichia_coli	6.92854e-05	0.00160246	4.5316	-11.5513
FUCCAT-PWY: fucose degradation|g__Escherichia.s__Escherichia_coli	0.000244091	0.00563901	4.52995	-9.73532
PWY-6700: queuosine biosynthesis|g__Bacteroides.s__Bacteroides_thetaiotaomicron	9.33936e-05	0.00213624	4.51561	-11.1285
PWY-2942: L-lysine biosynthesis III|g__Bacteroides.s__Bacteroides_vulgatus	0.000268737	0.00613931	4.51381	-9.60461
PWY-5855: ubiquinol-7 biosynthesis (prokaryotic)|g__Escherichia.s__Escherichia_coli	8.84363e-05	0.00200171	4.50045	-11.2148
PWY-5856: ubiquinol-9 biosynthesis (prokaryotic)|g__Escherichia.s__Escherichia_coli	8.84363e-05	0.00200171	4.50045	-11.2148
PWY-5857: ubiquinol-10 biosynthesis (prokaryotic)|g__Escherichia.s__Escherichia_coli	8.84363e-05	0.00200171	4.50045	-11.2148
PWY-6708: ubiquinol-8 biosynthesis (prokaryotic)|g__Escherichia.s__Escherichia_coli	8.84363e-05	0.00200171	4.50045	-11.2148
PWY-6892: thiazole biosynthesis I (E. coli)|g__Escherichia.s__Escherichia_coli	0.00014281	0.00322153	4.49557	-10.5258
PWY-6386: UDP-N-acetylmuramoyl-pentapeptide biosynthesis II (lysine-containing)|g__Escherichia.s__Escherichia_coli	9.09998e-05	0.00203499	4.48302	-11.1823
TRPSYN-PWY: L-tryptophan biosynthesis|g__Escherichia.s__Escherichia_coli	8.64504e-05	0.00193264	4.48256	-11.2565
GLYCOLYSIS: glycolysis I (from glucose 6-phosphate)|g__Escherichia.s__Escherichia_coli	0.000127508	0.00284389	4.4792	-10.6975
NAGLIPASYN-PWY: lipid IVA biosynthesis|g__Escherichia.s__Escherichia_coli	6.68325e-05	0.00147718	4.46615	-11.636
PWY-5667: CDP-diacylglycerol biosynthesis I|g__Escherichia.s__Escherichia_coli	0.000181307	0.00398727	4.45889	-10.1998
PWY0-1319: CDP-diacylglycerol biosynthesis II|g__Escherichia.s__Escherichia_coli	0.000181307	0.00398727	4.45889	-10.1998
PWY0-1533: methylphosphonate degradation I|g__Escherichia.s__Escherichia_coli	0.000125117	0.00273379	4.44955	-10.7397
PWY-6387: UDP-N-acetylmuramoyl-pentapeptide biosynthesis I (meso-diaminopimelate containing)|g__Escherichia.s__Escherichia_coli	0.000105751	0.00230573	4.44648	-10.9838
UBISYN-PWY: superpathway of ubiquinol-8 biosynthesis (prokaryotic)|g__Escherichia.s__Escherichia_coli	9.25513e-05	0.00200281	4.43562	-11.1816
HOMOSER-METSYN-PWY: L-methionine biosynthesis I|g__Escherichia.s__Escherichia_coli	0.00010187	0.002197	4.43073	-11.0456
PWY-5484: glycolysis II (from fructose 6-phosphate)|g__Escherichia.s__Escherichia_coli	0.000119101	0.00256831	4.43056	-10.8202
PWY-7229: superpathway of adenosine nucleotides de novo biosynthesis I|g__Escherichia.s__Escherichia_coli	8.0278e-05	0.00172382	4.42446	-11.3924
PWY-5188: tetrapyrrole biosynthesis I (from glutamate)|g__Escherichia.s__Escherichia_coli	9.56984e-05	0.0020541	4.42387	-11.1392
PWY-4981: L-proline biosynthesis II (from arginine)|unclassified	0.0015585	0.0333423	4.41912	-7.11606
PWY-7269: NAD/NADP-NADH/NADPH mitochondrial interconversion (yeast)|g__Escherichia.s__Escherichia_coli	0.000172594	0.00361845	4.38992	-10.3054
PWY0-1298: superpathway of pyrimidine deoxyribonucleosides degradation|g__Escherichia.s__Escherichia_coli	0.000100694	0.00209125	4.37632	-11.0896
UDPNAGSYN-PWY: UDP-N-acetyl-D-glucosamine biosynthesis I|g__Escherichia.s__Escherichia_coli	0.000119439	0.00243439	4.34922	-10.8568
FOLSYN-PWY: superpathway of tetrahydrofolate biosynthesis and salvage|g__Escherichia.s__Escherichia_coli	8.54913e-05	0.0017343	4.34243	-11.3426
PWY-6700: queuosine biosynthesis|g__Bacteroides.s__Bacteroides_vulgatus	0.000370197	0.00750722	4.34191	-9.22846
PWY-6126: superpathway of adenosine nucleotides de novo biosynthesis II|g__Escherichia.s__Escherichia_coli	7.65912e-05	0.00154089	4.33044	-11.5072
PWY-621: sucrose degradation III (sucrose invertase)|g__Streptococcus.s__Streptococcus_parasanguinis	4.26013e-05	0.000837825	4.29768	-12.3699
POLYAMSYN-PWY: superpathway of polyamine biosynthesis I|g__Escherichia.s__Escherichia_coli	7.84872e-05	0.00152405	4.27931	-11.4975
PWY-7013: L-1.2-propanediol degradation|g__Escherichia.s__Escherichia_coli	6.30143e-05	0.00122124	4.27652	-11.8157
ILEUSYN-PWY: L-isoleucine biosynthesis I (from threonine)|g__Streptococcus.s__Streptococcus_parasanguinis	5.09338e-05	0.000985448	4.27408	-12.124
VALSYN-PWY: L-valine biosynthesis|g__Streptococcus.s__Streptococcus_parasanguinis	5.09338e-05	0.000985448	4.27408	-12.124
KDO-NAGLIPASYN-PWY: superpathway of (Kdo)2-lipid A biosynthesis|g__Escherichia.s__Escherichia_coli	9.43831e-05	0.00181494	4.26525	-11.2385
GLYCOL-GLYOXDEG-PWY: superpathway of glycol metabolism and degradation|g__Escherichia.s__Escherichia_coli	0.00017561	0.00335211	4.25463	-10.348
PWY-7315: dTDP-N-acetylthomosamine biosynthesis|g__Escherichia.s__Escherichia_coli	0.000206375	0.00391443	4.24547	-10.1197
PWY-5838: superpathway of menaquinol-8 biosynthesis I|g__Escherichia.s__Escherichia_coli	0.000135246	0.00256288	4.24411	-10.7301
DTDPRHAMSYN-PWY: dTDP-L-rhamnose biosynthesis I|g__Methanobrevibacter.s__Methanobrevibacter_smithii	4.76351e-05	0.000902163	4.24329	-12.236
LACTOSECAT-PWY: lactose and galactose degradation I|g__Streptococcus.s__Streptococcus_salivarius	9.37699e-06	0.000177173	4.23989	-14.5825
PWY-5897: superpathway of menaquinol-11 biosynthesis|g__Escherichia.s__Escherichia_coli	0.000136494	0.00255569	4.2268	-10.7255
PWY-5898: superpathway of menaquinol-12 biosynthesis|g__Escherichia.s__Escherichia_coli	0.000136494	0.00255569	4.2268	-10.7255
PWY-5899: superpathway of menaquinol-13 biosynthesis|g__Escherichia.s__Escherichia_coli	0.000136494	0.00255569	4.2268	-10.7255
PWY-6122: 5-aminoimidazole ribonucleotide biosynthesis II|g__Clostridium.s__Clostridium_nexile	2.73095e-05	0.000503956	4.20582	-13.0573
PWY-6277: superpathway of 5-aminoimidazole ribonucleotide biosynthesis|g__Clostridium.s__Clostridium_nexile	2.73095e-05	0.000503956	4.20582	-13.0573
PWY-6122: 5-aminoimidazole ribonucleotide biosynthesis II|g__Escherichia.s__Escherichia_coli	9.14408e-05	0.00168123	4.20053	-11.3165
PWY-6277: superpathway of 5-aminoimidazole ribonucleotide biosynthesis|g__Escherichia.s__Escherichia_coli	9.14408e-05	0.00168123	4.20053	-11.3165
PWY-5705: allantoin degradation to glyoxylate III|g__Escherichia.s__Escherichia_coli	9.8991e-05	0.0018184	4.19923	-11.2027
PWY-6527: stachyose degradation|g__Escherichia.s__Escherichia_coli	8.20781e-05	0.00150508	4.1967	-11.4743
COA-PWY: coenzyme A biosynthesis I|g__Escherichia.s__Escherichia_coli	0.000120291	0.00219911	4.19232	-10.925
PWY-6121: 5-aminoimidazole ribonucleotide biosynthesis I|g__Streptococcus.s__Streptococcus_parasanguinis	5.59081e-05	0.00102189	4.19204	-12.0306
PWY0-862: (5Z)-dodec-5-enoate biosynthesis|g__Escherichia.s__Escherichia_coli	0.000282352	0.00503576	4.15664	-9.7119
PWY-6121: 5-aminoimidazole ribonucleotide biosynthesis I|g__Escherichia.s__Escherichia_coli	0.000100174	0.00177601	4.14806	-11.2112
COBALSYN-PWY: adenosylcobalamin salvage from cobinamide I|g__Escherichia.s__Escherichia_coli	0.000133029	0.00235753	4.14746	-10.8022
PWY-6122: 5-aminoimidazole ribonucleotide biosynthesis II|g__Streptococcus.s__Streptococcus_parasanguinis	5.45069e-05	0.000964209	4.14484	-12.0908
PWY-6277: superpathway of 5-aminoimidazole ribonucleotide biosynthesis|g__Streptococcus.s__Streptococcus_parasanguinis	5.45069e-05	0.000964209	4.14484	-12.0908
PWY-6700: queuosine biosynthesis|g__Escherichia.s__Escherichia_coli	0.000151393	0.00264247	4.12552	-10.6267
PWY0-1338: polymyxin resistance|g__Escherichia.s__Escherichia_coli	8.05717e-05	0.00139611	4.11499	-11.5419
PWY-5686: UMP biosynthesis|g__Escherichia.s__Escherichia_coli	0.000103672	0.00178954	4.10949	-11.1809
ARGDEG-PWY: superpathway of L-arginine. putrescine. and 4-aminobutanoate degradation|g__Escherichia.s__Escherichia_coli	7.77607e-05	0.00134042	4.1075	-11.5969
ORNARGDEG-PWY: superpathway of L-arginine and L-ornithine degradation|g__Escherichia.s__Escherichia_coli	7.77607e-05	0.00134042	4.1075	-11.5969
PWY-6121: 5-aminoimidazole ribonucleotide biosynthesis I|g__Clostridium.s__Clostridium_nexile	3.17337e-05	0.000546968	4.10737	-12.8899
PWY-7221: guanosine ribonucleotides de novo biosynthesis|g__Escherichia.s__Escherichia_coli	0.000108975	0.00187393	4.104	-11.1117
UNINTEGRATED|g__Streptococcus.s__Streptococcus_salivarius	0.130675	2.24571	4.10312	-0.884385
PWY-6125: superpathway of guanosine nucleotides de novo biosynthesis II|g__Escherichia.s__Escherichia_coli	6.05888e-05	0.00102625	4.08219	-11.9695
PWY-1269: CMP-3-deoxy-D-manno-octulosonate biosynthesis I|g__Bacteroides.s__Bacteroides_thetaiotaomicron	0.000133823	0.00225989	4.07785	-10.8285
PWY-5863: superpathway of phylloquinol biosynthesis|g__Escherichia.s__Escherichia_coli	0.000130697	0.00218343	4.0623	-10.8703
PWY0-1296: purine ribonucleosides degradation|g__Clostridium.s__Clostridium_nexile	2.95696e-05	0.000488645	4.0466	-13.0222
PWY-7111: pyruvate fermentation to isobutanol (engineered)|g__Streptococcus.s__Streptococcus_parasanguinis	7.62926e-05	0.00126045	4.04625	-11.655
PWY-6387: UDP-N-acetylmuramoyl-pentapeptide biosynthesis I (meso-diaminopimelate containing)|g__Streptococcus.s__Streptococcus_parasanguinis	4.37439e-05	0.000720693	4.04223	-12.4594
PWY-5189: tetrapyrrole biosynthesis II (from glycine)|g__Escherichia.s__Escherichia_coli	0.000141934	0.00233292	4.03885	-10.7631
1CMET2-PWY: N10-formyl-tetrahydrofolate biosynthesis|g__Bacteroides.s__Bacteroides_thetaiotaomicron	0.00010673	0.00174992	4.03525	-11.1761
PWY-6609: adenine and adenosine salvage III|g__Streptococcus.s__Streptococcus_parasanguinis	7.36362e-05	0.00120257	4.02956	-11.7144
PWY-6897: thiamin salvage II|g__Methanobrevibacter.s__Methanobrevibacter_smithii	3.30268e-05	0.000537955	4.02578	-12.8731
PWY0-1277: 3-phenylpropanoate and 3-(3-hydroxyphenyl)propanoate degradation|g__Escherichia.s__Escherichia_coli	0.000114201	0.00185872	4.02466	-11.0838
PWY-3841: folate transformations II|g__Streptococcus.s__Streptococcus_parasanguinis	4.60899e-05	0.000743302	4.01142	-12.3995
BRANCHED-CHAIN-AA-SYN-PWY: superpathway of branched amino acid biosynthesis|g__Streptococcus.s__Streptococcus_parasanguinis	4.93145e-05	0.00079314	4.00749	-12.3039
PWY-6386: UDP-N-acetylmuramoyl-pentapeptide biosynthesis II (lysine-containing)|g__Streptococcus.s__Streptococcus_parasanguinis	4.72249e-05	0.000754101	3.99714	-12.3715
PWY-7111: pyruvate fermentation to isobutanol (engineered)|g__Bifidobacterium.s__Bifidobacterium_longum	1.75628e-05	0.000278991	3.98962	-13.8023
1CMET2-PWY: N10-formyl-tetrahydrofolate biosynthesis|g__Escherichia.s__Escherichia_coli	8.48658e-05	0.00133822	3.97899	-11.535
PWY-6703: preQ0 biosynthesis|g__Bacteroides.s__Bacteroides_thetaiotaomicron	0.000134213	0.00211528	3.97825	-10.8741
PWY0-1061: superpathway of L-alanine biosynthesis|g__Streptococcus.s__Streptococcus_parasanguinis	3.99596e-05	0.000627341	3.97264	-12.6248
PWY-5103: L-isoleucine biosynthesis III|g__Streptococcus.s__Streptococcus_parasanguinis	4.93145e-05	0.000771877	3.96829	-12.3235
THRESYN-PWY: superpathway of L-threonine biosynthesis|g__Methanobrevibacter.s__Methanobrevibacter_smithii	3.05466e-05	0.000476826	3.96438	-13.0164
VALSYN-PWY: L-valine biosynthesis|g__Bifidobacterium.s__Bifidobacterium_longum	1.75628e-05	0.000268895	3.93644	-13.8289
PWY-2942: L-lysine biosynthesis III|g__Coprobacter.s__Coprobacter_fastidiosus	5.48047e-05	0.000815645	3.89557	-12.2076
PEPTIDOGLYCANSYN-PWY: peptidoglycan biosynthesis I (meso-diaminopimelate containing)|g__Streptococcus.s__Streptococcus_parasanguinis	4.67106e-05	0.000693358	3.89178	-12.44
GLUTORN-PWY: L-ornithine biosynthesis|unclassified	0.000933617	0.013534	3.85761	-8.13607
PWY-7663: gondoate biosynthesis (anaerobic)|g__Bacteroides.s__Bacteroides_thetaiotaomicron	0.000103249	0.00148808	3.84925	-11.317
PWY66-422: D-galactose degradation V (Leloir pathway)|g__Escherichia.s__Escherichia_coli	9.77575e-05	0.00140831	3.84861	-11.3961
UNINTEGRATED|g__Eubacterium.s__Eubacterium_siraeum	0.457839	6.58706	3.84672	0.796273
PWY-7220: adenosine deoxyribonucleotides de novo biosynthesis II|g__Escherichia.s__Escherichia_coli	9.15326e-05	0.00130983	3.83895	-11.4959
PWY-7222: guanosine deoxyribonucleotides de novo biosynthesis II|g__Escherichia.s__Escherichia_coli	9.15326e-05	0.00130983	3.83895	-11.4959
PWY-5686: UMP biosynthesis|g__Streptococcus.s__Streptococcus_parasanguinis	3.22953e-05	0.00045876	3.82835	-13.0041
HISDEG-PWY: L-histidine degradation I|unclassified	0.00124736	0.0177102	3.82763	-7.73309
PWY0-162: superpathway of pyrimidine ribonucleotides de novo biosynthesis|g__Escherichia.s__Escherichia_coli	7.0944e-05	0.00100665	3.82674	-11.8696
PWY-3841: folate transformations II|g__Bacteroides.s__Bacteroides_thetaiotaomicron	0.000126661	0.0017917	3.82228	-11.0356
PWY-3841: folate transformations II|g__Escherichia.s__Escherichia_coli	9.22751e-05	0.00130087	3.81739	-11.495
PWY-7219: adenosine ribonucleotides de novo biosynthesis|g__Methanobrevibacter.s__Methanobrevibacter_smithii	7.26404e-05	0.00102386	3.8171	-11.8403
LACTOSECAT-PWY: lactose and galactose degradation I|g__Streptococcus.s__Streptococcus_parasanguinis	6.01445e-05	0.000846654	3.81527	-12.1136
PANTOSYN-PWY: pantothenate and coenzyme A biosynthesis I|g__Escherichia.s__Escherichia_coli	0.000156129	0.00216927	3.7964	-10.7468
PWY66-409: superpathway of purine nucleotide salvage|g__Escherichia.s__Escherichia_coli	9.03356e-05	0.00123285	3.77055	-11.5491
GLUTORN-PWY: L-ornithine biosynthesis|g__Escherichia.s__Escherichia_coli	0.000120585	0.0016384	3.76416	-11.1356
PWY-5913: TCA cycle VI (obligate autotrophs)|g__Escherichia.s__Escherichia_coli	0.000237779	0.00322583	3.76198	-10.1571
ECASYN-PWY: enterobacterial common antigen biosynthesis|g__Escherichia.s__Escherichia_coli	0.000191132	0.00258205	3.75588	-10.4752
ARGSYNBSUB-PWY: L-arginine biosynthesis II (acetyl cycle)|g__Escherichia.s__Escherichia_coli	0.000116589	0.00156236	3.74422	-11.1942
PWY-5860: superpathway of demethylmenaquinol-6 biosynthesis I|g__Escherichia.s__Escherichia_coli	0.000145393	0.0019426	3.73996	-10.8778
PWY-5862: superpathway of demethylmenaquinol-9 biosynthesis|g__Escherichia.s__Escherichia_coli	0.000145393	0.0019426	3.73996	-10.8778
PWY-7357: thiamin formation from pyrithiamine and oxythiamine (yeast)|g__Methanobrevibacter.s__Methanobrevibacter_smithii	4.98011e-05	0.000656807	3.72122	-12.4329
GLUCARDEG-PWY: D-glucarate degradation I|g__Escherichia.s__Escherichia_coli	0.000107871	0.00140928	3.70758	-11.3246
PWY-7219: adenosine ribonucleotides de novo biosynthesis|g__Bacteroides.s__Bacteroides_thetaiotaomicron	0.000235124	0.00306278	3.70335	-10.2026
PWY-5154: L-arginine biosynthesis III (via N-acetyl-L-citrulline)|unclassified	0.000631162	0.00817046	3.69434	-8.78253
PWY-7184: pyrimidine deoxyribonucleotides de novo biosynthesis I|g__Escherichia.s__Escherichia_coli	7.18993e-05	0.000930412	3.69382	-11.9168
PWY-6317: galactose degradation I (Leloir pathway)|g__Escherichia.s__Escherichia_coli	0.000107622	0.00137804	3.67858	-11.3425
PWY-6823: molybdenum cofactor biosynthesis|g__Escherichia.s__Escherichia_coli	0.000115457	0.00147751	3.67774	-11.2415
PWY-7229: superpathway of adenosine nucleotides de novo biosynthesis I|g__Bacteroides.s__Bacteroides_dorei	7.84922e-05	0.000999816	3.67104	-11.8016
PWY-7228: superpathway of guanosine nucleotides de novo biosynthesis I|g__Parabacteroides.s__Parabacteroides_johnsonii	2.51039e-05	0.000318956	3.66737	-13.448
GLUCOSE1PMETAB-PWY: glucose and glucose-1-phosphate degradation|g__Escherichia.s__Escherichia_coli	0.000364148	0.00460786	3.6615	-9.59244
PWY-6122: 5-aminoimidazole ribonucleotide biosynthesis II|g__Bifidobacterium.s__Bifidobacterium_longum	1.89077e-05	0.000232563	3.62057	-13.8804
PWY-6277: superpathway of 5-aminoimidazole ribonucleotide biosynthesis|g__Bifidobacterium.s__Bifidobacterium_longum	1.89077e-05	0.000232563	3.62057	-13.8804
PWY0-166: superpathway of pyrimidine deoxyribonucleotides de novo biosynthesis (E. coli)|g__Escherichia.s__Escherichia_coli	7.96152e-05	0.00096773	3.60349	-11.8149
PWY-841: superpathway of purine nucleotides de novo biosynthesis I|g__Escherichia.s__Escherichia_coli	9.97084e-05	0.00121178	3.60326	-11.4903
PWY-5667: CDP-diacylglycerol biosynthesis I|g__Bacteroides.s__Bacteroides_thetaiotaomicron	0.000180503	0.00218116	3.595	-10.6382
PWY0-1319: CDP-diacylglycerol biosynthesis II|g__Bacteroides.s__Bacteroides_thetaiotaomicron	0.000180503	0.00218116	3.595	-10.6382
PWY-7228: superpathway of guanosine nucleotides de novo biosynthesis I|g__Escherichia.s__Escherichia_coli	0.000103167	0.00122744	3.5726	-11.4564
ARGININE-SYN4-PWY: L-ornithine de novo biosynthesis|g__Bacteroides.s__Bacteroides_thetaiotaomicron	0.000172899	0.00204862	3.56666	-10.7145
PWY-6151: S-adenosyl-L-methionine cycle I|g__Coprobacter.s__Coprobacter_fastidiosus	5.30474e-05	0.0006229	3.55364	-12.4255
PWY-6126: superpathway of adenosine nucleotides de novo biosynthesis II|g__Bacteroides.s__Bacteroides_dorei	8.49995e-05	0.000996855	3.55186	-11.7463
METHANOGENESIS-PWY: methanogenesis from H2 and CO2|g__Methanobrevibacter.s__Methanobrevibacter_smithii	6.98615e-05	0.000817922	3.54939	-12.0304
PWY-7219: adenosine ribonucleotides de novo biosynthesis|g__Clostridium.s__Clostridium_nexile	5.03666e-05	0.000574406	3.51153	-12.5214
ARGSYN-PWY: L-arginine biosynthesis I (via L-ornithine)|unclassified	0.00333751	0.0374512	3.48817	-6.48293
COA-PWY-1: coenzyme A biosynthesis II (mammalian)|g__Streptococcus.s__Streptococcus_parasanguinis	7.7059e-05	0.000863187	3.48564	-11.9209
PWY-3001: superpathway of L-isoleucine biosynthesis I|g__Escherichia.s__Escherichia_coli	0.00013979	0.00155975	3.47998	-11.0645
HISDEG-PWY: L-histidine degradation I|g__Streptococcus.s__Streptococcus_parasanguinis	6.27088e-05	0.000698546	3.47762	-12.2222
ARGSYN-PWY: L-arginine biosynthesis I (via L-ornithine)|g__Escherichia.s__Escherichia_coli	0.000183835	0.00204592	3.47627	-10.6712
NONOXIPENT-PWY: pentose phosphate pathway (non-oxidative branch)|g__Bacteroides.s__Bacteroides_thetaiotaomicron	0.000169864	0.00188486	3.47201	-10.7873
HSERMETANA-PWY: L-methionine biosynthesis III|g__Methanobrevibacter.s__Methanobrevibacter_smithii	6.93431e-05	0.000764659	3.46299	-12.0844
PWY-6703: preQ0 biosynthesis|g__Coprobacter.s__Coprobacter_fastidiosus	4.32183e-05	0.000466956	3.43357	-12.7812
PWY-6123: inosine-5'-phosphate biosynthesis I|g__Bacteroides.s__Bacteroides_thetaiotaomicron	0.000177652	0.00191596	3.43094	-10.7432
GALACTARDEG-PWY: D-galactarate degradation I|g__Escherichia.s__Escherichia_coli	9.96801e-05	0.00107371	3.42916	-11.5778
GLUCARGALACTSUPER-PWY: superpathway of D-glucarate and D-galactarate degradation|g__Escherichia.s__Escherichia_coli	9.96801e-05	0.00107371	3.42916	-11.5778
PWY-5097: L-lysine biosynthesis VI|g__Coprobacter.s__Coprobacter_fastidiosus	6.4634e-05	0.000695727	3.42816	-12.2033
PWY-7219: adenosine ribonucleotides de novo biosynthesis|g__Streptococcus.s__Streptococcus_parasanguinis	0.0001269	0.0013606	3.42247	-11.2328
PWY-7400: L-arginine biosynthesis IV (archaebacteria)|unclassified	0.00378471	0.0403353	3.41379	-6.33871
COA-PWY: coenzyme A biosynthesis I|g__Streptococcus.s__Streptococcus_parasanguinis	7.7059e-05	0.000812943	3.39912	-11.9641
PWY-4981: L-proline biosynthesis II (from arginine)|g__Streptococcus.s__Streptococcus_parasanguinis	5.9719e-05	0.00062329	3.38364	-12.3396
PWY-2942: L-lysine biosynthesis III|g__Bacteroides.s__Bacteroides_thetaiotaomicron	0.000181772	0.00189669	3.38328	-10.7339
COA-PWY-1: coenzyme A biosynthesis II (mammalian)|g__Coprobacter.s__Coprobacter_fastidiosus	5.50852e-05	0.000569601	3.37021	-12.4629
ORNDEG-PWY: superpathway of ornithine degradation|g__Escherichia.s__Escherichia_coli	0.000118712	0.00118895	3.32415	-11.3782
ARG㳢_xD800_숍SYN: superpathway of arginine and polyamine biosynthesis|g__Escherichia.s__Escherichia_coli	0.000109445	0.00107762	3.29957	-11.5077
PWY0-321: phenylacetate degradation I (aerobic)|g__Escherichia.s__Escherichia_coli	8.82067e-05	0.000867809	3.29842	-11.8195
PWY-5840: superpathway of menaquinol-7 biosynthesis|g__Escherichia.s__Escherichia_coli	0.000215512	0.00211805	3.29689	-10.5315
PWY-5845: superpathway of menaquinol-9 biosynthesis|g__Escherichia.s__Escherichia_coli	0.000215512	0.00211805	3.29689	-10.5315
PWY-5850: superpathway of menaquinol-6 biosynthesis I|g__Escherichia.s__Escherichia_coli	0.000215512	0.00211805	3.29689	-10.5315
PWY-5896: superpathway of menaquinol-10 biosynthesis|g__Escherichia.s__Escherichia_coli	0.000215512	0.00211805	3.29689	-10.5315
PWY-5676: acetyl-CoA fermentation to butanoate II|unclassified	0.00201971	0.0196971	3.28576	-7.30875
PWY-5097: L-lysine biosynthesis VI|g__Bacteroides.s__Bacteroides_thetaiotaomicron	0.000196708	0.00190758	3.27761	-10.6728
PANTO-PWY: phosphopantothenate biosynthesis I|g__Alistipes.s__Alistipes_finegoldii	7.27321e-05	0.000699607	3.26588	-12.1141
GLYCOLYSIS: glycolysis I (from glucose 6-phosphate)|unclassified	0.00252369	0.0242519	3.26449	-6.998
PWY-7197: pyrimidine deoxyribonucleotide phosphorylation|g__Escherichia.s__Escherichia_coli	7.59148e-05	0.000726784	3.25907	-12.0557
HISTSYN-PWY: L-histidine biosynthesis|g__Bacteroides.s__Bacteroides_thetaiotaomicron	0.000215492	0.00205189	3.25125	-10.5545
PWY-7111: pyruvate fermentation to isobutanol (engineered)|g__Coprobacter.s__Coprobacter_fastidiosus	7.07941e-05	0.000658221	3.21687	-12.1776
VALSYN-PWY: L-valine biosynthesis|g__Coprobacter.s__Coprobacter_fastidiosus	7.07941e-05	0.000658221	3.21687	-12.1776
PANTO-PWY: phosphopantothenate biosynthesis I|g__Coprobacter.s__Coprobacter_fastidiosus	6.01723e-05	0.000559099	3.21593	-12.4126
PWY-5154: L-arginine biosynthesis III (via N-acetyl-L-citrulline)|g__Escherichia.s__Escherichia_coli	9.08652e-05	0.000837324	3.20399	-11.8239
COA-PWY-1: coenzyme A biosynthesis II (mammalian)|g__Bacteroides.s__Bacteroides_thetaiotaomicron	0.000190715	0.00168415	3.14253	-10.785
PWY-7199: pyrimidine deoxyribonucleosides salvage|g__Streptococcus.s__Streptococcus_parasanguinis	5.25962e-05	0.000462099	3.13517	-12.6471
PWY-6353: purine nucleotides degradation II (aerobic)|unclassified	0.00188119	0.0164562	3.12891	-7.48968
PWY-5667: CDP-diacylglycerol biosynthesis I|g__Coprobacter.s__Coprobacter_fastidiosus	6.61645e-05	0.000578139	3.12729	-12.3199
PWY0-1319: CDP-diacylglycerol biosynthesis II|g__Coprobacter.s__Coprobacter_fastidiosus	6.61645e-05	0.000578139	3.12729	-12.3199
PWY-6609: adenine and adenosine salvage III|g__Bacteroides.s__Bacteroides_thetaiotaomicron	0.000252731	0.00220069	3.12228	-10.389
PWY-1042: glycolysis IV (plant cytosol)|g__Bacteroides.s__Bacteroides_thetaiotaomicron	0.000294896	0.00256515	3.12076	-10.1671
UNINTEGRATED|g__Bacteroides.s__Bacteroides_thetaiotaomicron	0.319534	2.77927	3.12066	-0.0856259
PWY-7221: guanosine ribonucleotides de novo biosynthesis|g__Parabacteroides.s__Parabacteroides_johnsonii	2.93151e-05	0.00025397	3.11494	-13.5005
PWY-7400: L-arginine biosynthesis IV (archaebacteria)|g__Escherichia.s__Escherichia_coli	0.000184764	0.00154461	3.06349	-10.8703
PWY-6936: seleno-amino acid biosynthesis|g__Methanobrevibacter.s__Methanobrevibacter_smithii	6.48717e-05	0.000540752	3.0593	-12.3824
PWY-561: superpathway of glyoxylate cycle and fatty acid degradation|g__Escherichia.s__Escherichia_coli	8.74898e-05	0.000716959	3.0347	-11.9632
ASPASN-PWY: superpathway of L-aspartate and L-asparagine biosynthesis|g__Bacteroides.s__Bacteroides_thetaiotaomicron	0.000245353	0.00197876	3.01167	-10.487
PWY0-845: superpathway of pyridoxal 5'-phosphate biosynthesis and salvage|g__Bacteroides.s__Bacteroides_thetaiotaomicron	0.000231998	0.001844	2.99065	-10.5783
PANTO-PWY: phosphopantothenate biosynthesis I|g__Parabacteroides.s__Parabacteroides_johnsonii	2.91688e-05	0.000231441	2.98815	-13.5711
ARGSYNBSUB-PWY: L-arginine biosynthesis II (acetyl cycle)|unclassified	0.000677253	0.00531479	2.97224	-9.04189
PWY-5695: urate biosynthesis/inosine 5'-phosphate degradation|g__Bacteroides.s__Bacteroides_thetaiotaomicron	0.000243691	0.00191163	2.97168	-10.5168
PWY-6606: guanosine nucleotides degradation II|unclassified	0.00118677	0.00930167	2.97045	-8.23352
PWY-6124: inosine-5'-phosphate biosynthesis II|g__Bacteroides.s__Bacteroides_thetaiotaomicron	0.000257173	0.00198437	2.94787	-10.451
RHAMCAT-PWY: L-rhamnose degradation I|g__Bacteroides.s__Bacteroides_thetaiotaomicron	0.000293268	0.0022498	2.9395	-10.2657
KETOGLUCONMET-PWY: ketogluconate metabolism|g__Escherichia.s__Escherichia_coli	0.000250737	0.00190146	2.92286	-10.5001
PWY66-400: glycolysis VI (metazoan)|unclassified	0.00266725	0.020216	2.92207	-7.0894
PWY-6151: S-adenosyl-L-methionine cycle I|g__Streptococcus.s__Streptococcus_parasanguinis	7.18726e-05	0.000541069	2.9123	-12.308
PYRIDNUCSYN-PWY: NAD biosynthesis I (from aspartate)|g__Escherichia.s__Escherichia_coli	0.000246151	0.00185247	2.91184	-10.5322
PWY-5686: UMP biosynthesis|g__Bacteroides.s__Bacteroides_thetaiotaomicron	0.000236288	0.00176552	2.90147	-10.5964
PWY-7111: pyruvate fermentation to isobutanol (engineered)|g__Clostridium.s__Clostridium_nexile	6.06493e-05	0.000451726	2.89688	-12.5607
VALSYN-PWY: L-valine biosynthesis|g__Clostridium.s__Clostridium_nexile	6.06493e-05	0.000451726	2.89688	-12.5607
PWY4FS-7: phosphatidylglycerol biosynthesis I (plastidic)|unclassified	0.00116457	0.00856101	2.87798	-8.30699
PWY4FS-8: phosphatidylglycerol biosynthesis II (non-plastidic)|unclassified	0.00116457	0.00856101	2.87798	-8.30699
PWY-5030: L-histidine degradation III|g__Streptococcus.s__Streptococcus_parasanguinis	5.54462e-05	0.000404213	2.86596	-12.7056
PWY-7221: guanosine ribonucleotides de novo biosynthesis|g__Coprobacter.s__Coprobacter_fastidiosus	8.18871e-05	0.000596102	2.86385	-12.1441
UNINTEGRATED|g__Bifidobacterium.s__Bifidobacterium_longum	0.0433734	0.310876	2.84146	-3.10632
PWY-6168: flavin biosynthesis III (fungi)|g__Bacteroides.s__Bacteroides_thetaiotaomicron	0.000282427	0.00199279	2.81884	-10.3804
PWY-6737: starch degradation V|g__Alistipes.s__Alistipes_finegoldii	0.000145941	0.000993645	2.76735	-11.3587
BRANCHED-CHAIN-AA-SYN-PWY: superpathway of branched amino acid biosynthesis|g__Escherichia.s__Escherichia_coli	0.000223736	0.00151107	2.7557	-10.7481
PWY-7117: C4 photosynthetic carbon assimilation cycle. PEPCK type|unclassified	0.000362339	0.00240696	2.7318	-10.0645
PWY-5103: L-isoleucine biosynthesis III|g__Escherichia.s__Escherichia_coli	0.000205274	0.00133208	2.69805	-10.9011
PWY-7219: adenosine ribonucleotides de novo biosynthesis|g__Bacteroides.s__Bacteroides_stercoris	1.59028e-05	0.000103147	2.69735	-14.5917
PANTO-PWY: phosphopantothenate biosynthesis I|g__Bacteroides.s__Bacteroides_thetaiotaomicron	0.000301446	0.00195468	2.69696	-10.3473
PYRIDOXSYN-PWY: pyridoxal 5'-phosphate biosynthesis I|g__Bacteroides.s__Bacteroides_thetaiotaomicron	0.000278971	0.0017709	2.6663	-10.4744
PWY-621: sucrose degradation III (sucrose invertase)|g__Blautia.s__Ruminococcus_torques	0.00419965	0.0261626	2.63916	-6.57593
PWY-241: C4 photosynthetic carbon assimilation cycle. NADP-ME type|unclassified	0.000319884	0.00197028	2.62278	-10.2988
PWY-6123: inosine-5'-phosphate biosynthesis I|g__Streptococcus.s__Streptococcus_parasanguinis	5.40094e-05	0.000330666	2.61409	-12.8694
PWY-7234: inosine-5'-phosphate biosynthesis III|g__Streptococcus.s__Streptococcus_parasanguinis	5.40094e-05	0.000330666	2.61409	-12.8694
FAO-PWY: fatty acid &beta;-oxidation I|g__Escherichia.s__Escherichia_coli	6.60715e-05	0.000404271	2.61322	-12.579
PWY-6124: inosine-5'-phosphate biosynthesis II|g__Streptococcus.s__Streptococcus_parasanguinis	3.54717e-05	0.000215478	2.6028	-13.4816
PWY-5484: glycolysis II (from fructose 6-phosphate)|unclassified	0.00240974	0.0145302	2.5921	-7.40086
PWY-6386: UDP-N-acetylmuramoyl-pentapeptide biosynthesis II (lysine-containing)|g__Alistipes.s__Alistipes_finegoldii	0.000127996	0.000769556	2.58793	-11.6377
UNINTEGRATED|g__Streptococcus.s__Streptococcus_parasanguinis	0.117008	0.695045	2.5705	-1.81007
PWY-6387: UDP-N-acetylmuramoyl-pentapeptide biosynthesis I (meso-diaminopimelate containing)|g__Alistipes.s__Alistipes_finegoldii	0.000126974	0.000747855	2.55823	-11.6641
FERMENTATION-PWY: mixed acid fermentation|unclassified	0.000546866	0.00318615	2.54255	-9.56525
GLUCONEO-PWY: gluconeogenesis I|unclassified	0.00343397	0.0196838	2.51906	-6.92638
PWY-5695: urate biosynthesis/inosine 5'-phosphate degradation|g__Coprobacter.s__Coprobacter_fastidiosus	9.63631e-05	0.000550252	2.51354	-12.0844
P162-PWY: L-glutamate degradation V (via hydroxyglutarate)|unclassified	0.00182351	0.0101749	2.48022	-7.85895
PWY-7208: superpathway of pyrimidine nucleobases salvage|g__Escherichia.s__Escherichia_coli	0.000144269	0.000804611	2.47953	-11.5192
PWY-5136: fatty acid &beta;-oxidation II (peroxisome)|g__Escherichia.s__Escherichia_coli	5.86377e-05	0.000325406	2.47234	-12.8216
PEPTIDOGLYCANSYN-PWY: peptidoglycan biosynthesis I (meso-diaminopimelate containing)|g__Alistipes.s__Alistipes_finegoldii	0.000129597	0.000716953	2.46785	-11.6798
PWY-7111: pyruvate fermentation to isobutanol (engineered)|g__Clostridium.s__Clostridium_hathewayi	8.16623e-06	4.4135e-05	2.43418	-15.6848
PWY-5686: UMP biosynthesis|g__Alistipes.s__Alistipes_finegoldii	0.000167938	0.000904806	2.42968	-11.3249
NONOXIPENT-PWY: pentose phosphate pathway (non-oxidative branch)|g__Blautia.s__Ruminococcus_torques	0.00304776	0.0163823	2.42631	-7.14488
HCAMHPDEG-PWY: 3-phenylpropanoate and 3-(3-hydroxyphenyl)propanoate degradation to 2-oxopent-4-enoate|g__Escherichia.s__Escherichia_coli	0.000111412	0.000581263	2.38329	-11.9402
PWY-6690: cinnamate and 3-hydroxycinnamate degradation to 2-oxopent-4-enoate|g__Escherichia.s__Escherichia_coli	0.000111412	0.000581263	2.38329	-11.9402
PWY-5138: unsaturated. even numbered fatty acid &beta;-oxidation|g__Escherichia.s__Escherichia_coli	5.71214e-05	0.000296353	2.37521	-12.908
PWY-7221: guanosine ribonucleotides de novo biosynthesis|g__Bacteroides.s__Bacteroides_thetaiotaomicron	0.000395515	0.00204602	2.37102	-10.1185
PWY-6608: guanosine nucleotides degradation III|g__Odoribacter.s__Odoribacter_splanchnicus	0.000132159	0.000659374	2.31882	-11.726
PWY-4702: phytate degradation I|unclassified	7.19512e-05	0.000347961	2.27384	-12.6257
PWY-7357: thiamin formation from pyrithiamine and oxythiamine (yeast)|g__Blautia.s__Ruminococcus_torques	0.00221347	0.010556	2.25367	-7.69264
PWY-5913: TCA cycle VI (obligate autotrophs)|unclassified	0.00028231	0.00131	2.21421	-10.6833
COA-PWY-1: coenzyme A biosynthesis II (mammalian)|g__Alistipes.s__Alistipes_finegoldii	7.34385e-05	0.000336548	2.19621	-12.635
PWY-7219: adenosine ribonucleotides de novo biosynthesis|g__Parabacteroides.s__Parabacteroides_distasonis	0.000801094	0.00361577	2.17426	-9.19861
NONOXIPENT-PWY: pentose phosphate pathway (non-oxidative branch)|g__Odoribacter.s__Odoribacter_splanchnicus	0.000137614	0.00062018	2.17206	-11.7411
PWY-7111: pyruvate fermentation to isobutanol (engineered)|g__Odoribacter.s__Odoribacter_splanchnicus	0.000136682	0.000615489	2.17091	-11.7514
ARGININE-SYN4-PWY: L-ornithine de novo biosynthesis|unclassified	0.00228734	0.0102838	2.16862	-7.6878
PWY-7111: pyruvate fermentation to isobutanol (engineered)|g__Parabacteroides.s__Parabacteroides_johnsonii	7.91229e-05	0.000353663	2.16021	-12.5454
VALSYN-PWY: L-valine biosynthesis|g__Parabacteroides.s__Parabacteroides_johnsonii	7.91229e-05	0.000353663	2.16021	-12.5454
FUCCAT-PWY: fucose degradation|unclassified	0.000305826	0.00135069	2.14292	-10.6035
PWY-5097: L-lysine biosynthesis VI|g__Parabacteroides.s__Parabacteroides_johnsonii	5.54696e-05	0.000244211	2.13836	-13.0688
PWY-6703: preQ0 biosynthesis|g__Bacteroides.s__Bacteroides_uniformis	0.00243761	0.0106086	2.12169	-7.61947
COA-PWY: coenzyme A biosynthesis I|g__Blautia.s__Ruminococcus_torques	0.00147822	0.00641071	2.11663	-8.34361
PWY-1042: glycolysis IV (plant cytosol)|g__Odoribacter.s__Odoribacter_splanchnicus	0.000171774	0.000741937	2.11079	-11.4518
PWY-5103: L-isoleucine biosynthesis III|g__Odoribacter.s__Odoribacter_splanchnicus	0.00014907	0.000638021	2.09761	-11.6629
PWY-7219: adenosine ribonucleotides de novo biosynthesis|g__Coprobacter.s__Coprobacter_fastidiosus	0.000100479	0.000427753	2.08988	-12.2359
NONMEVIPP-PWY: methylerythritol phosphate pathway I|g__Alistipes.s__Alistipes_finegoldii	0.000139847	0.000595274	2.08971	-11.759
PENTOSE-P-PWY: pentose phosphate pathway|g__Odoribacter.s__Odoribacter_splanchnicus	0.000136363	0.000567314	2.0567	-11.8119
PWY-5667: CDP-diacylglycerol biosynthesis I|g__Bacteroides.s__Bacteroides_uniformis	0.00240473	0.00999191	2.05488	-7.67247
PWY0-1319: CDP-diacylglycerol biosynthesis II|g__Bacteroides.s__Bacteroides_uniformis	0.00240473	0.00999191	2.05488	-7.67247
PANTO-PWY: phosphopantothenate biosynthesis I|g__Bacteroides.s__Bacteroides_uniformis	0.00233143	0.00966018	2.05084	-7.71915
PWY-6608: guanosine nucleotides degradation III|g__Blautia.s__Ruminococcus_torques	0.00168185	0.00694179	2.04526	-8.19311
ILEUSYN-PWY: L-isoleucine biosynthesis I (from threonine)|g__Streptococcus.s__Streptococcus_australis	2.39273e-05	9.75568e-05	2.02759	-14.3372
COA-PWY-1: coenzyme A biosynthesis II (mammalian)|g__Blautia.s__Ruminococcus_torques	0.00148731	0.00602982	2.01941	-8.38338
PWY-7199: pyrimidine deoxyribonucleosides salvage|unclassified	0.00682924	0.0276023	2.01499	-6.18656
ANAGLYCOLYSIS-PWY: glycolysis III (from glucose)|g__Odoribacter.s__Odoribacter_splanchnicus	0.000146717	0.000592653	2.01416	-11.7276
PWY-5367: petroselinate biosynthesis|g__Blautia.s__Ruminococcus_torques	0.00229712	0.00920452	2.00252	-7.7647
PWY-6609: adenine and adenosine salvage III|g__Blautia.s__Ruminococcus_torques	0.00226931	0.00908156	2.00069	-7.78319
PWY-6737: starch degradation V|g__Streptococcus.s__Streptococcus_australis	1.98203e-05	7.90471e-05	1.99573	-14.6248
PWY-5973: cis-vaccenate biosynthesis|g__Blautia.s__Ruminococcus_torques	0.0021571	0.00860086	1.99539	-7.859
PWY-7219: adenosine ribonucleotides de novo biosynthesis|g__Bacteroides.s__Bacteroides_fragilis	0.00221504	0.00881218	1.99217	-7.82237
SALVADEHYPOX-PWY: adenosine nucleotides degradation II|g__Blautia.s__Ruminococcus_torques	0.00161025	0.00638125	1.98656	-8.28522
PWY-2942: L-lysine biosynthesis III|g__Parabacteroides.s__Parabacteroides_johnsonii	7.1108e-05	0.000280438	1.9796	-12.7898
PWY-6609: adenine and adenosine salvage III|g__Streptococcus.s__Streptococcus_australis	1.44322e-05	5.64793e-05	1.96843	-15.0961
PWY-5695: urate biosynthesis/inosine 5'-phosphate degradation|g__Blautia.s__Ruminococcus_torques	0.00169227	0.00660641	1.9649	-8.22437
PWY-6386: UDP-N-acetylmuramoyl-pentapeptide biosynthesis II (lysine-containing)|g__Blautia.s__Ruminococcus_torques	0.00193561	0.00751741	1.95745	-8.03427
RHAMCAT-PWY: L-rhamnose degradation I|g__Blautia.s__Ruminococcus_torques	0.00164447	0.00637641	1.95512	-8.2706
PWY-5659: GDP-mannose biosynthesis|g__Odoribacter.s__Odoribacter_splanchnicus	0.000133394	0.000516249	1.95237	-11.8958
UNINTEGRATED|g__Alistipes.s__Alistipes_finegoldii	0.204969	0.793211	1.9523	-1.31037
PWY-6387: UDP-N-acetylmuramoyl-pentapeptide biosynthesis I (meso-diaminopimelate containing)|g__Blautia.s__Ruminococcus_torques	0.00199696	0.00770863	1.94867	-7.99364
PWY-6125: superpathway of guanosine nucleotides de novo biosynthesis II|g__Bacteroides.s__Bacteroides_dorei	0.00026149	0.00100923	1.94843	-10.9267
BRANCHED-CHAIN-AA-SYN-PWY: superpathway of branched amino acid biosynthesis|g__Odoribacter.s__Odoribacter_splanchnicus	0.0001703	0.000656583	1.9469	-11.5462
PWY-7219: adenosine ribonucleotides de novo biosynthesis|g__Blautia.s__Ruminococcus_torques	0.00235737	0.00903803	1.93883	-7.75919
PWY-6385: peptidoglycan biosynthesis III (mycobacteria)|g__Blautia.s__Ruminococcus_torques	0.00183148	0.00698541	1.93133	-8.12711
PWY-7219: adenosine ribonucleotides de novo biosynthesis|g__Parabacteroides.s__Parabacteroides_johnsonii	9.99115e-05	0.000378569	1.92183	-12.3281
PWY-7237: myo-. chiro- and scillo-inositol degradation|unclassified	0.00611134	0.0231324	1.92035	-6.39412
PWY-5659: GDP-mannose biosynthesis|g__Alistipes.s__Alistipes_finegoldii	0.000140883	0.000530388	1.91255	-11.8369
PEPTIDOGLYCANSYN-PWY: peptidoglycan biosynthesis I (meso-diaminopimelate containing)|g__Blautia.s__Ruminococcus_torques	0.0019449	0.00728914	1.90605	-8.05306
PWY0-1296: purine ribonucleosides degradation|g__Blautia.s__Ruminococcus_torques	0.00237536	0.00890148	1.9059	-7.76469
PWY-6703: preQ0 biosynthesis|g__Odoribacter.s__Odoribacter_splanchnicus	0.000124349	0.000463789	1.89907	-12.0238
THISYNARA-PWY: superpathway of thiamin diphosphate biosynthesis III (eukaryotes)|g__Blautia.s__Ruminococcus_torques	0.00195774	0.00726033	1.89084	-8.05117
ANAEROFRUCAT-PWY: homolactic fermentation|unclassified	0.00735212	0.027073	1.88062	-6.14731
P185-PWY: formaldehyde assimilation III (dihydroxyacetone cycle)|unclassified	0.00214029	0.00784693	1.87432	-7.93082
MET-SAM-PWY: superpathway of S-adenosyl-L-methionine biosynthesis|g__Blautia.s__Ruminococcus_torques	0.00188922	0.00675368	1.83789	-8.12905
PWY-7208: superpathway of pyrimidine nucleobases salvage|g__Blautia.s__Ruminococcus_torques	0.00207663	0.00741044	1.83532	-7.99388
METSYN-PWY: L-homoserine and L-methionine biosynthesis|g__Blautia.s__Ruminococcus_torques	0.00184356	0.00657675	1.83488	-8.16585
PYRIDNUCSYN-PWY: NAD biosynthesis I (from aspartate)|g__Alistipes.s__Alistipes_finegoldii	0.000182938	0.000652031	1.83358	-11.4996
P42-PWY: incomplete reductive TCA cycle|unclassified	0.000736644	0.00261643	1.82856	-9.49246
PWY-7221: guanosine ribonucleotides de novo biosynthesis|g__Odoribacter.s__Odoribacter_splanchnicus	0.000161753	0.00056587	1.80668	-11.6906
PWY66-399: gluconeogenesis III|unclassified	0.00290903	0.0101666	1.80523	-7.52263
PWY-5030: L-histidine degradation III|unclassified	0.000785104	0.00274199	1.80427	-9.4127
PWY-1042: glycolysis IV (plant cytosol)|g__Blautia.s__Ruminococcus_torques	0.00254058	0.00881686	1.79511	-7.72307
PWY-5347: superpathway of L-methionine biosynthesis (transsulfuration)|g__Blautia.s__Ruminococcus_torques	0.00176876	0.00610583	1.78745	-8.24932
HOMOSER-METSYN-PWY: L-methionine biosynthesis I|g__Blautia.s__Ruminococcus_torques	0.0014852	0.0050879	1.77641	-8.50692
NONMEVIPP-PWY: methylerythritol phosphate pathway I|g__Odoribacter.s__Odoribacter_splanchnicus	0.000182347	0.000623139	1.77286	-11.5346
UNINTEGRATED|g__Coprobacter.s__Coprobacter_fastidiosus	0.0921143	0.31448	1.77147	-2.5547
ASPASN-PWY: superpathway of L-aspartate and L-asparagine biosynthesis|unclassified	0.00296591	0.0101108	1.76935	-7.51263
CALVIN-PWY: Calvin-Benson-Bassham cycle|g__Odoribacter.s__Odoribacter_splanchnicus	0.000166022	0.000565426	1.76797	-11.6724
UNINTEGRATED|g__Parabacteroides.s__Parabacteroides_johnsonii	0.153083	0.519846	1.76377	-1.82573
PWY-6151: S-adenosyl-L-methionine cycle I|g__Bacteroides.s__Bacteroides_uniformis	0.00253072	0.00858299	1.76193	-7.74527
THISYNARA-PWY: superpathway of thiamin diphosphate biosynthesis III (eukaryotes)|unclassified	0.00174763	0.00588218	1.75095	-8.28491
ARGININE-SYN4-PWY: L-ornithine de novo biosynthesis|g__Bacteroides.s__Bacteroides_caccae	0.000208707	0.000701536	1.74904	-11.3517
PWY-7219: adenosine ribonucleotides de novo biosynthesis|g__Odoribacter.s__Odoribacter_splanchnicus	0.000290617	0.000973188	1.7436	-10.8768
PWY-5097: L-lysine biosynthesis VI|g__Blautia.s__Ruminococcus_torques	0.00174372	0.00583788	1.74327	-8.29198
PWY-5667: CDP-diacylglycerol biosynthesis I|g__Bacteroides.s__Bacteroides_caccae	0.00024174	0.000806943	1.73901	-11.1448
PWY0-1319: CDP-diacylglycerol biosynthesis II|g__Bacteroides.s__Bacteroides_caccae	0.00024174	0.000806943	1.73901	-11.1448
PWY-7219: adenosine ribonucleotides de novo biosynthesis|g__Alistipes.s__Alistipes_finegoldii	0.000201491	0.000669663	1.73272	-11.4106
SER-GLYSYN-PWY: superpathway of L-serine and glycine biosynthesis I|g__Blautia.s__Ruminococcus_torques	0.00150214	0.00497225	1.72688	-8.51533
TRPSYN-PWY: L-tryptophan biosynthesis|g__Blautia.s__Ruminococcus_torques	0.00123691	0.00409407	1.7268	-8.79565
SER-GLYSYN-PWY: superpathway of L-serine and glycine biosynthesis I|g__Gordonibacter.s__Gordonibacter_pamelaeae	1.5378e-05	5.07738e-05	1.72322	-15.1272
PYRIDNUCSYN-PWY: NAD biosynthesis I (from aspartate)|g__Odoribacter.s__Odoribacter_splanchnicus	0.000162324	0.00052983	1.70665	-11.7355
1CMET2-PWY: N10-formyl-tetrahydrofolate biosynthesis|g__Bacteroides.s__Bacteroides_caccae	0.000281491	0.000902694	1.68115	-10.954
COA-PWY-1: coenzyme A biosynthesis II (mammalian)|g__Parabacteroides.s__Parabacteroides_distasonis	0.000798087	0.00254407	1.67252	-9.45491
PWY-7663: gondoate biosynthesis (anaerobic)|g__Bacteroides.s__Bacteroides_caccae	0.000337389	0.00106296	1.6556	-10.7055
GLUTORN-PWY: L-ornithine biosynthesis|g__Blautia.s__Ruminococcus_torques	0.00157259	0.00491137	1.64298	-8.49115
PWY-5686: UMP biosynthesis|g__Odoribacter.s__Odoribacter_splanchnicus	0.000158966	0.000496311	1.64253	-11.7977
PWY0-1296: purine ribonucleosides degradation|g__Dorea.s__Dorea_longicatena	0.000545255	0.00169703	1.63801	-10.0218
PWY-2942: L-lysine biosynthesis III|g__Blautia.s__Ruminococcus_torques	0.00194409	0.00604792	1.63735	-8.18802
PWY-5686: UMP biosynthesis|g__Parabacteroides.s__Parabacteroides_johnsonii	6.73676e-05	0.000207557	1.62338	-13.0459
PWY-7111: pyruvate fermentation to isobutanol (engineered)|g__Blautia.s__Ruminococcus_torques	0.00199798	0.00612901	1.61711	-8.15869
PWY-6123: inosine-5'-phosphate biosynthesis I|g__Bacteroides.s__Bacteroides_fragilis	0.0020645	0.0062594	1.60023	-8.11987
PWY-6124: inosine-5'-phosphate biosynthesis II|g__Bacteroides.s__Bacteroides_fragilis	0.00197441	0.00598566	1.60009	-8.18432
VALSYN-PWY: L-valine biosynthesis|g__Blautia.s__Ruminococcus_torques	0.00199798	0.00603462	1.59472	-8.16988
BRANCHED-CHAIN-AA-SYN-PWY: superpathway of branched amino acid biosynthesis|g__Streptococcus.s__Streptococcus_australis	2.25122e-05	6.78592e-05	1.59183	-14.643
THRESYN-PWY: superpathway of L-threonine biosynthesis|g__Blautia.s__Ruminococcus_torques	0.00178991	0.00539268	1.59111	-8.33034
PWY-6305: putrescine biosynthesis IV|g__Blautia.s__Ruminococcus_torques	0.00171584	0.00516918	1.59102	-8.39136
PWY-6151: S-adenosyl-L-methionine cycle I|g__Blautia.s__Ruminococcus_torques	0.00157358	0.00473215	1.58844	-8.51751
ILEUSYN-PWY: L-isoleucine biosynthesis I (from threonine)|g__Odoribacter.s__Odoribacter_splanchnicus	0.000229576	0.000688704	1.58491	-11.2963
VALSYN-PWY: L-valine biosynthesis|g__Odoribacter.s__Odoribacter_splanchnicus	0.000229576	0.000688704	1.58491	-11.2963
ARO-PWY: chorismate biosynthesis I|g__Roseburia.s__Roseburia_inulinivorans	0.000986298	0.000325362	-1.59998	-10.7857
PWY-6147: 6-hydroxymethyl-dihydropterin diphosphate biosynthesis I|g__Bacteroides.s__Bacteroides_xylanisolvens	0.00115372	0.000380569	-1.60006	-10.5595
NONMEVIPP-PWY: methylerythritol phosphate pathway I|g__Eubacterium.s__Eubacterium_ramulus	0.000845757	0.000278573	-1.60219	-11.0086
PWY-6122: 5-aminoimidazole ribonucleotide biosynthesis II|g__Anaerostipes.s__Anaerostipes_hadrus	0.000313854	0.000102541	-1.61389	-12.4446
PWY-6277: superpathway of 5-aminoimidazole ribonucleotide biosynthesis|g__Anaerostipes.s__Anaerostipes_hadrus	0.000313854	0.000102541	-1.61389	-12.4446
PWY-7219: adenosine ribonucleotides de novo biosynthesis|g__Roseburia.s__Roseburia_inulinivorans	0.00117103	0.000382337	-1.61486	-10.5454
ASPASN-PWY: superpathway of L-aspartate and L-asparagine biosynthesis|g__Bacteroides.s__Bacteroides_xylanisolvens	0.00173022	0.000562911	-1.61998	-9.98482
COA-PWY: coenzyme A biosynthesis I|g__Eubacterium.s__Eubacterium_ventriosum	0.00016443	5.30811e-05	-1.63121	-13.3858
PWY-6588: pyruvate fermentation to acetone|g__Lachnospiraceae_noname.s__Lachnospiraceae_bacterium_5_1_63FAA	0.000140295	4.52088e-05	-1.63379	-13.6161
PWY-6700: queuosine biosynthesis|g__Coprococcus.s__Coprococcus_eutactus	0.00087568	0.000279449	-1.64782	-10.9812
PWY-6122: 5-aminoimidazole ribonucleotide biosynthesis II|g__Eubacterium.s__Eubacterium_ventriosum	0.000175527	5.60114e-05	-1.6479	-13.3
PWY-6277: superpathway of 5-aminoimidazole ribonucleotide biosynthesis|g__Eubacterium.s__Eubacterium_ventriosum	0.000175527	5.60114e-05	-1.6479	-13.3
HISTSYN-PWY: L-histidine biosynthesis|g__Lachnospiraceae_noname.s__Lachnospiraceae_bacterium_5_1_63FAA	0.000316116	0.000100543	-1.65265	-12.4536
UNINTEGRATED|g__Eubacterium.s__Eubacterium_rectale	6.94792	2.2013	-1.65822	1.96747
PWY-1269: CMP-3-deoxy-D-manno-octulosonate biosynthesis I|unclassified	0.0202817	0.00640937	-1.66192	-6.45464
ILEUSYN-PWY: L-isoleucine biosynthesis I (from threonine)|g__Faecalibacterium.s__Faecalibacterium_prausnitzii	0.0761464	0.0236364	-1.68777	-4.55896
VALSYN-PWY: L-valine biosynthesis|g__Faecalibacterium.s__Faecalibacterium_prausnitzii	0.0761464	0.0236364	-1.68777	-4.55896
PWY-6163: chorismate biosynthesis from 3-dehydroquinate|g__Roseburia.s__Roseburia_inulinivorans	0.000979431	0.000302413	-1.69542	-10.8435
PWY66-409: superpathway of purine nucleotide salvage|g__Streptococcus.s__Streptococcus_thermophilus	0.000573967	0.000176784	-1.69898	-11.6162
PWY-5097: L-lysine biosynthesis VI|g__Anaerostipes.s__Anaerostipes_hadrus	0.000355722	0.00010941	-1.70101	-12.3075
PWY-5188: tetrapyrrole biosynthesis I (from glutamate)|g__Anaerostipes.s__Anaerostipes_hadrus	0.000235779	7.20613e-05	-1.71014	-12.9053
PWY-6386: UDP-N-acetylmuramoyl-pentapeptide biosynthesis II (lysine-containing)|g__Bacteroides.s__Bacteroides_xylanisolvens	0.00227975	0.000695389	-1.71298	-9.6334
PWY-7219: adenosine ribonucleotides de novo biosynthesis|g__Faecalibacterium.s__Faecalibacterium_prausnitzii	0.0599395	0.0181595	-1.72278	-4.92174
PWY-2942: L-lysine biosynthesis III|g__Anaerostipes.s__Anaerostipes_hadrus	0.000324088	9.78271e-05	-1.72808	-12.4554
PWY-1042: glycolysis IV (plant cytosol)|g__Bacteroides.s__Bacteroides_xylanisolvens	0.00263224	0.000794413	-1.72833	-9.43366
PWY-7111: pyruvate fermentation to isobutanol (engineered)|g__Lachnospiraceae_noname.s__Lachnospiraceae_bacterium_7_1_58FAA	0.000130864	3.94636e-05	-1.72947	-13.7644
VALSYN-PWY: L-valine biosynthesis|g__Lachnospiraceae_noname.s__Lachnospiraceae_bacterium_7_1_58FAA	0.000130864	3.94636e-05	-1.72947	-13.7644
THISYNARA-PWY: superpathway of thiamin diphosphate biosynthesis III (eukaryotes)|g__Blautia.s__Ruminococcus_obeum	0.000168953	5.07967e-05	-1.73382	-13.398
P161-PWY: acetylene degradation|unclassified	0.00446344	0.00133055	-1.74613	-8.6807
HISTSYN-PWY: L-histidine biosynthesis|g__Anaerostipes.s__Anaerostipes_hadrus	0.000309732	9.19763e-05	-1.75169	-12.5325
PANTOSYN-PWY: pantothenate and coenzyme A biosynthesis I|g__Anaerostipes.s__Anaerostipes_hadrus	0.000379436	0.00011263	-1.75227	-12.24
PWY-7221: guanosine ribonucleotides de novo biosynthesis|g__Roseburia.s__Roseburia_inulinivorans	0.0009137	0.000270022	-1.75864	-10.9753
PWY-7282: 4-amino-2-methyl-5-phosphomethylpyrimidine biosynthesis (yeast)|g__Bacteroides.s__Bacteroides_xylanisolvens	0.00129179	0.000379196	-1.76836	-10.4806
COA-PWY-1: coenzyme A biosynthesis II (mammalian)|g__Lachnospiraceae_noname.s__Lachnospiraceae_bacterium_3_1_46FAA	0.000118567	3.45436e-05	-1.77921	-13.9316
PWY-7539: 6-hydroxymethyl-dihydropterin diphosphate biosynthesis III (Chlamydia)|g__Bacteroides.s__Bacteroides_xylanisolvens	0.00106649	0.000310108	-1.78203	-10.7639
PWY-5695: urate biosynthesis/inosine 5'-phosphate degradation|g__Blautia.s__Ruminococcus_obeum	0.000268094	7.76001e-05	-1.78861	-12.7593
PWY-6122: 5-aminoimidazole ribonucleotide biosynthesis II|g__Roseburia.s__Roseburia_inulinivorans	0.000904696	0.000260634	-1.79541	-11.008
PWY-6277: superpathway of 5-aminoimidazole ribonucleotide biosynthesis|g__Roseburia.s__Roseburia_inulinivorans	0.000904696	0.000260634	-1.79541	-11.008
NONOXIPENT-PWY: pentose phosphate pathway (non-oxidative branch)|g__Faecalibacterium.s__Faecalibacterium_prausnitzii	0.0121795	0.00350005	-1.799	-7.25891
PWY-6703: preQ0 biosynthesis|g__Bacteroides.s__Bacteroides_xylanisolvens	0.00142048	0.000406735	-1.80421	-10.3615
PWY-7228: superpathway of guanosine nucleotides de novo biosynthesis I|g__Streptococcus.s__Streptococcus_thermophilus	0.000663415	0.000189628	-1.80674	-11.4612
PWY-5667: CDP-diacylglycerol biosynthesis I|g__Coprococcus.s__Coprococcus_eutactus	0.00103237	0.000293163	-1.81618	-10.8279
PWY0-1319: CDP-diacylglycerol biosynthesis II|g__Coprococcus.s__Coprococcus_eutactus	0.00103237	0.000293163	-1.81618	-10.8279
PWY-1042: glycolysis IV (plant cytosol)|g__Lachnospiraceae_noname.s__Lachnospiraceae_bacterium_5_1_63FAA	0.000896166	0.000253619	-1.8211	-11.0345
SER-GLYSYN-PWY: superpathway of L-serine and glycine biosynthesis I|g__Anaerostipes.s__Anaerostipes_hadrus	0.000388217	0.000108211	-1.84302	-12.2524
UNINTEGRATED|g__Alistipes.s__Alistipes_putredinis	4.31296	1.18915	-1.85874	1.1793
PWY-7357: thiamin formation from pyrithiamine and oxythiamine (yeast)|g__Roseburia.s__Roseburia_inulinivorans	0.000985823	0.000271169	-1.86213	-10.9175
RHAMCAT-PWY: L-rhamnose degradation I|g__Bacteroides.s__Bacteroides_xylanisolvens	0.0017017	0.000467511	-1.86391	-10.1308
PWY-724: superpathway of L-lysine. L-threonine and L-methionine biosynthesis II|g__Blautia.s__Ruminococcus_torques	0.000456045	0.000123655	-1.88286	-12.04
PWY-7221: guanosine ribonucleotides de novo biosynthesis|g__Lachnospiraceae_noname.s__Lachnospiraceae_bacterium_7_1_58FAA	7.32384e-05	1.97214e-05	-1.89284	-14.6835
UNINTEGRATED|g__Ruminococcus.s__Ruminococcus_bromii	1.32264	0.353884	-1.90207	-0.547617
NONOXIPENT-PWY: pentose phosphate pathway (non-oxidative branch)|g__Lachnospiraceae_noname.s__Lachnospiraceae_bacterium_5_1_63FAA	0.000586261	0.000156138	-1.90872	-11.6905
PWY-6588: pyruvate fermentation to acetone|g__Anaerostipes.s__Anaerostipes_hadrus	0.000342039	9.07366e-05	-1.91441	-12.4708
PWY-7220: adenosine deoxyribonucleotides de novo biosynthesis II|g__Holdemania.s__Holdemania_filiformis	7.9911e-05	2.09671e-05	-1.93027	-14.5764
PWY-7222: guanosine deoxyribonucleotides de novo biosynthesis II|g__Holdemania.s__Holdemania_filiformis	7.9911e-05	2.09671e-05	-1.93027	-14.5764
PWY-7219: adenosine ribonucleotides de novo biosynthesis|g__Lachnospiraceae_noname.s__Lachnospiraceae_bacterium_7_1_58FAA	0.000201498	5.25769e-05	-1.93827	-13.2461
THISYNARA-PWY: superpathway of thiamin diphosphate biosynthesis III (eukaryotes)|g__Bacteroides.s__Bacteroides_xylanisolvens	0.00139691	0.000361715	-1.94931	-10.4582
PWY-3841: folate transformations II|g__Streptococcus.s__Streptococcus_thermophilus	0.000363819	9.37726e-05	-1.95598	-12.4025
PWY0-1296: purine ribonucleosides degradation|g__Roseburia.s__Roseburia_inulinivorans	0.00105485	0.000269826	-1.96693	-10.8722
PWY-5695: urate biosynthesis/inosine 5'-phosphate degradation|g__Bacteroides.s__Bacteroides_ovatus	0.00020214	5.12378e-05	-1.98007	-13.2624
PWY66-422: D-galactose degradation V (Leloir pathway)|g__Anaerostipes.s__Anaerostipes_hadrus	0.000563418	0.000142605	-1.98218	-11.7846
PWY66-422: D-galactose degradation V (Leloir pathway)|g__Lachnospiraceae_noname.s__Lachnospiraceae_bacterium_5_1_63FAA	0.000529717	0.000133999	-1.983	-11.874
PWY-6121: 5-aminoimidazole ribonucleotide biosynthesis I|g__Anaerostipes.s__Anaerostipes_hadrus	0.00036802	9.30027e-05	-1.98444	-12.4001
PWY-5695: urate biosynthesis/inosine 5'-phosphate degradation|g__Roseburia.s__Roseburia_inulinivorans	0.00113304	0.000284667	-1.99285	-10.782
PWY-6151: S-adenosyl-L-methionine cycle I|g__Anaerostipes.s__Anaerostipes_hadrus	0.000494238	0.000122682	-2.01028	-11.9876
PWY-5686: UMP biosynthesis|g__Lachnospiraceae_noname.s__Lachnospiraceae_bacterium_5_1_63FAA	0.000339809	8.43148e-05	-2.01086	-12.5284
PWY-6168: flavin biosynthesis III (fungi)|g__Anaerostipes.s__Anaerostipes_hadrus	0.000324996	8.00977e-05	-2.02059	-12.5976
NONOXIPENT-PWY: pentose phosphate pathway (non-oxidative branch)|g__Anaerostipes.s__Anaerostipes_hadrus	0.000770563	0.000188432	-2.03186	-11.3577
PWY-5097: L-lysine biosynthesis VI|g__Lachnospiraceae_noname.s__Lachnospiraceae_bacterium_5_1_63FAA	0.000271845	6.64061e-05	-2.0334	-12.8616
PWY-6387: UDP-N-acetylmuramoyl-pentapeptide biosynthesis I (meso-diaminopimelate containing)|g__Bacteroides.s__Bacteroides_xylanisolvens	0.002202	0.000537832	-2.03359	-9.84376
PWY-6125: superpathway of guanosine nucleotides de novo biosynthesis II|g__Streptococcus.s__Streptococcus_thermophilus	0.000531848	0.000129356	-2.03966	-11.8965
PWY-6317: galactose degradation I (Leloir pathway)|g__Anaerostipes.s__Anaerostipes_hadrus	0.000561715	0.00013655	-2.04041	-11.8181
PWY-5100: pyruvate fermentation to acetate and lactate II|g__Anaerostipes.s__Anaerostipes_hadrus	0.000601953	0.0001434	-2.06961	-11.7329
PWY-2942: L-lysine biosynthesis III|g__Lachnospiraceae_noname.s__Lachnospiraceae_bacterium_5_1_63FAA	0.000331081	7.88211e-05	-2.07053	-12.5958
PWY66-422: D-galactose degradation V (Leloir pathway)|g__Eubacterium.s__Eubacterium_rectale	0.00499332	0.00118262	-2.07801	-8.68479
PYRIDNUCSYN-PWY: NAD biosynthesis I (from aspartate)|g__Anaerostipes.s__Anaerostipes_hadrus	0.000352511	8.3064e-05	-2.08537	-12.5127
DTDPRHAMSYN-PWY: dTDP-L-rhamnose biosynthesis I|g__Eubacterium.s__Eubacterium_rectale	0.00523464	0.00122355	-2.09702	-8.6262
PWY-621: sucrose degradation III (sucrose invertase)|g__Anaerostipes.s__Anaerostipes_hadrus	0.00039988	9.25421e-05	-2.11139	-12.3438
THRESYN-PWY: superpathway of L-threonine biosynthesis|g__Lachnospiraceae_noname.s__Lachnospiraceae_bacterium_5_1_63FAA	0.000413937	9.57531e-05	-2.11202	-12.2943
PWY-6386: UDP-N-acetylmuramoyl-pentapeptide biosynthesis II (lysine-containing)|g__Anaerostipes.s__Anaerostipes_hadrus	0.000448969	0.000103445	-2.11776	-12.18
PWY-7111: pyruvate fermentation to isobutanol (engineered)|g__Eubacterium.s__Eubacterium_rectale	0.00674811	0.00154939	-2.12278	-8.27269
VALSYN-PWY: L-valine biosynthesis|g__Eubacterium.s__Eubacterium_rectale	0.00674811	0.00154939	-2.12278	-8.27269
NONMEVIPP-PWY: methylerythritol phosphate pathway I|g__Anaerostipes.s__Anaerostipes_hadrus	0.000274248	6.25979e-05	-2.1313	-12.8979
DTDPRHAMSYN-PWY: dTDP-L-rhamnose biosynthesis I|g__Anaerostipes.s__Anaerostipes_hadrus	0.000533318	0.000121692	-2.13177	-11.9386
PWY-6936: seleno-amino acid biosynthesis|g__Lachnospiraceae_noname.s__Lachnospiraceae_bacterium_5_1_63FAA	0.000444718	0.000101162	-2.13622	-12.2029
PWY-5686: UMP biosynthesis|g__Anaerostipes.s__Anaerostipes_hadrus	0.000413125	9.3119e-05	-2.14943	-12.3158
PWY-6317: galactose degradation I (Leloir pathway)|g__Lachnospiraceae_noname.s__Lachnospiraceae_bacterium_5_1_63FAA	0.000637283	0.00014342	-2.15169	-11.6916
PEPTIDOGLYCANSYN-PWY: peptidoglycan biosynthesis I (meso-diaminopimelate containing)|g__Anaerostipes.s__Anaerostipes_hadrus	0.000439338	9.8684e-05	-2.15444	-12.2296
PYRIDNUCSYN-PWY: NAD biosynthesis I (from aspartate)|g__Lachnospiraceae_noname.s__Lachnospiraceae_bacterium_5_1_63FAA	0.000486578	0.000108958	-2.15889	-12.0845
PWY-7221: guanosine ribonucleotides de novo biosynthesis|g__Bacteroides.s__Bacteroides_nordii	0.000740164	0.000165654	-2.15967	-11.4797
PWY-6387: UDP-N-acetylmuramoyl-pentapeptide biosynthesis I (meso-diaminopimelate containing)|g__Anaerostipes.s__Anaerostipes_hadrus	0.000424677	9.47802e-05	-2.16371	-12.2832
THRESYN-PWY: superpathway of L-threonine biosynthesis|g__Anaerostipes.s__Anaerostipes_hadrus	0.000453383	0.000101064	-2.16547	-12.1897
CALVIN-PWY: Calvin-Benson-Bassham cycle|g__Blautia.s__Ruminococcus_torques	0.000588118	0.000130955	-2.16703	-11.8151
PWY-6387: UDP-N-acetylmuramoyl-pentapeptide biosynthesis I (meso-diaminopimelate containing)|g__Lachnospiraceae_noname.s__Lachnospiraceae_bacterium_5_1_63FAA	0.000482641	0.00010704	-2.1728	-12.1032
PWY-6737: starch degradation V|g__Anaerostipes.s__Anaerostipes_hadrus	0.000604353	0.000133944	-2.17376	-11.7792
PANTO-PWY: phosphopantothenate biosynthesis I|g__Eubacterium.s__Eubacterium_ventriosum	0.000264392	5.82193e-05	-2.18311	-12.9766
HISTSYN-PWY: L-histidine biosynthesis|g__Ruminococcus.s__Ruminococcus_bromii	0.00235932	0.000516651	-2.19111	-9.82297
ARO-PWY: chorismate biosynthesis I|g__Anaerostipes.s__Anaerostipes_hadrus	0.000357978	7.75647e-05	-2.2064	-12.551
PWY-6700: queuosine biosynthesis|g__Anaerostipes.s__Anaerostipes_hadrus	0.000625167	0.00013466	-2.21492	-11.7509
PWY-5667: CDP-diacylglycerol biosynthesis I|g__Lachnospiraceae_noname.s__Lachnospiraceae_bacterium_5_1_63FAA	0.000640678	0.000137918	-2.21579	-11.716
PWY0-1319: CDP-diacylglycerol biosynthesis II|g__Lachnospiraceae_noname.s__Lachnospiraceae_bacterium_5_1_63FAA	0.000640678	0.000137918	-2.21579	-11.716
PEPTIDOGLYCANSYN-PWY: peptidoglycan biosynthesis I (meso-diaminopimelate containing)|g__Bacteroides.s__Bacteroides_xylanisolvens	0.00231337	0.000488352	-2.244	-9.87779
PWY-7219: adenosine ribonucleotides de novo biosynthesis|g__Eubacterium.s__Eubacterium_rectale	0.00956121	0.00201661	-2.24526	-7.83122
PEPTIDOGLYCANSYN-PWY: peptidoglycan biosynthesis I (meso-diaminopimelate containing)|g__Lachnospiraceae_noname.s__Lachnospiraceae_bacterium_5_1_63FAA	0.000524465	0.000109606	-2.25852	-12.0261
PWY-6123: inosine-5'-phosphate biosynthesis I|g__Lachnospiraceae_noname.s__Lachnospiraceae_bacterium_5_1_63FAA	0.000299363	6.23291e-05	-2.26392	-12.8378
PWY-5659: GDP-mannose biosynthesis|g__Lachnospiraceae_noname.s__Lachnospiraceae_bacterium_5_1_63FAA	0.000378262	7.81863e-05	-2.2744	-12.5055
PWY-5347: superpathway of L-methionine biosynthesis (transsulfuration)|g__Anaerostipes.s__Anaerostipes_hadrus	0.00040801	8.40289e-05	-2.27965	-12.3989
COMPLETE-ARO-PWY: superpathway of aromatic amino acid biosynthesis|g__Anaerostipes.s__Anaerostipes_hadrus	0.00041159	8.43712e-05	-2.28639	-12.3897
PWY-6163: chorismate biosynthesis from 3-dehydroquinate|g__Anaerostipes.s__Anaerostipes_hadrus	0.000403273	8.17998e-05	-2.30159	-12.4268
MET-SAM-PWY: superpathway of S-adenosyl-L-methionine biosynthesis|g__Anaerostipes.s__Anaerostipes_hadrus	0.00038271	7.70871e-05	-2.31169	-12.5073
PANTO-PWY: phosphopantothenate biosynthesis I|g__Anaerostipes.s__Anaerostipes_hadrus	0.000612516	0.000123324	-2.31229	-11.8291
PWY-6737: starch degradation V|g__Eubacterium.s__Eubacterium_rectale	0.00826996	0.00165403	-2.3219	-8.07885
METSYN-PWY: L-homoserine and L-methionine biosynthesis|g__Anaerostipes.s__Anaerostipes_hadrus	0.00040221	7.9653e-05	-2.33615	-12.4478
PWY-6122: 5-aminoimidazole ribonucleotide biosynthesis II|g__Lachnospiraceae_noname.s__Lachnospiraceae_bacterium_5_1_63FAA	0.000468568	9.21504e-05	-2.3462	-12.2326
PWY-6277: superpathway of 5-aminoimidazole ribonucleotide biosynthesis|g__Lachnospiraceae_noname.s__Lachnospiraceae_bacterium_5_1_63FAA	0.000468568	9.21504e-05	-2.3462	-12.2326
PWY-6386: UDP-N-acetylmuramoyl-pentapeptide biosynthesis II (lysine-containing)|g__Lachnospiraceae_noname.s__Lachnospiraceae_bacterium_5_1_63FAA	0.00057849	0.000113648	-2.34772	-11.9293
HOMOSER-METSYN-PWY: L-methionine biosynthesis I|g__Anaerostipes.s__Anaerostipes_hadrus	0.000344599	6.74102e-05	-2.35388	-12.6797
PWY-5347: superpathway of L-methionine biosynthesis (transsulfuration)|g__Lachnospiraceae_noname.s__Lachnospiraceae_bacterium_5_1_63FAA	0.000547006	0.000106294	-2.36349	-12.0179
PEPTIDOGLYCANSYN-PWY: peptidoglycan biosynthesis I (meso-diaminopimelate containing)|g__Lachnospiraceae_noname.s__Lachnospiraceae_bacterium_3_1_46FAA	0.000126083	2.41614e-05	-2.3836	-14.1451
HOMOSER-METSYN-PWY: L-methionine biosynthesis I|g__Lachnospiraceae_noname.s__Lachnospiraceae_bacterium_5_1_63FAA	0.000596393	0.000110934	-2.42656	-11.9247
METSYN-PWY: L-homoserine and L-methionine biosynthesis|g__Lachnospiraceae_noname.s__Lachnospiraceae_bacterium_5_1_63FAA	0.000579918	0.000107428	-2.43248	-11.9681
PWY-7237: myo-. chiro- and scillo-inositol degradation|g__Lachnospiraceae_noname.s__Lachnospiraceae_bacterium_5_1_63FAA	0.00087243	0.000161476	-2.43372	-11.3795
GLYCOGENSYNTH-PWY: glycogen biosynthesis I (from ADP-D-Glucose)|g__Eubacterium.s__Eubacterium_rectale	0.00743194	0.00135339	-2.45716	-8.30062
PWY-7219: adenosine ribonucleotides de novo biosynthesis|g__Alistipes.s__Alistipes_senegalensis	4.50808e-05	8.16623e-06	-2.46477	-15.6695
VALSYN-PWY: L-valine biosynthesis|g__Lachnospiraceae_noname.s__Lachnospiraceae_bacterium_5_1_63FAA	0.000616849	0.000111519	-2.46763	-11.8966
COMPLETE-ARO-PWY: superpathway of aromatic amino acid biosynthesis|g__Lachnospiraceae_noname.s__Lachnospiraceae_bacterium_5_1_63FAA	0.000527633	9.51405e-05	-2.4714	-12.1239
PWY-5667: CDP-diacylglycerol biosynthesis I|g__Anaerostipes.s__Anaerostipes_hadrus	0.000188737	3.39883e-05	-2.47327	-13.608
PWY0-1319: CDP-diacylglycerol biosynthesis II|g__Anaerostipes.s__Anaerostipes_hadrus	0.000188737	3.39883e-05	-2.47327	-13.608
PWY-5100: pyruvate fermentation to acetate and lactate II|g__Lachnospiraceae_noname.s__Lachnospiraceae_bacterium_5_1_63FAA	0.000517725	9.24271e-05	-2.4858	-12.1584
PWY-5189: tetrapyrrole biosynthesis II (from glycine)|unclassified	0.00286044	0.000499643	-2.51727	-9.70818
GLYCOGENSYNTH-PWY: glycogen biosynthesis I (from ADP-D-Glucose)|g__Lachnospiraceae_noname.s__Lachnospiraceae_bacterium_5_1_63FAA	0.000458771	7.98106e-05	-2.52312	-12.3515
HISTSYN-PWY: L-histidine biosynthesis|g__Streptococcus.s__Streptococcus_thermophilus	0.000559044	9.66797e-05	-2.53168	-12.0706
MET-SAM-PWY: superpathway of S-adenosyl-L-methionine biosynthesis|g__Lachnospiraceae_noname.s__Lachnospiraceae_bacterium_5_1_63FAA	0.000600036	0.000103148	-2.54033	-11.9728
PWY-6386: UDP-N-acetylmuramoyl-pentapeptide biosynthesis II (lysine-containing)|g__Lachnospiraceae_noname.s__Lachnospiraceae_bacterium_3_1_46FAA	0.000134686	2.30543e-05	-2.54649	-14.1314
PWY-6163: chorismate biosynthesis from 3-dehydroquinate|g__Lachnospiraceae_noname.s__Lachnospiraceae_bacterium_5_1_63FAA	0.00045192	7.64316e-05	-2.56383	-12.3936
P461-PWY: hexitol fermentation to lactate. formate. ethanol and acetate|g__Anaerostipes.s__Anaerostipes_hadrus	0.000931555	0.000156494	-2.57353	-11.3548
PWY-5304: superpathway of sulfur oxidation (Acidianus ambivalens)|g__Anaerostipes.s__Anaerostipes_hadrus	0.00076881	0.000126461	-2.60394	-11.6471
ARO-PWY: chorismate biosynthesis I|g__Lachnospiraceae_noname.s__Lachnospiraceae_bacterium_5_1_63FAA	0.000538975	8.78636e-05	-2.61688	-12.1659
P461-PWY: hexitol fermentation to lactate. formate. ethanol and acetate|g__Lachnospiraceae_noname.s__Lachnospiraceae_bacterium_5_1_63FAA	0.00122821	0.000196879	-2.64118	-10.9898
PWY-6737: starch degradation V|g__Lachnospiraceae_noname.s__Lachnospiraceae_bacterium_5_1_63FAA	0.00120003	0.000191603	-2.64688	-11.0262
UNINTEGRATED|g__Roseburia.s__Roseburia_intestinalis	8.96188	1.42642	-2.6514	1.8381
PWY0-1296: purine ribonucleosides degradation|g__Lachnospiraceae_noname.s__Lachnospiraceae_bacterium_3_1_46FAA	9.67777e-05	1.51926e-05	-2.6713	-14.6706
TRPSYN-PWY: L-tryptophan biosynthesis|g__Anaerostipes.s__Anaerostipes_hadrus	0.000781211	0.000121647	-2.68301	-11.6635
PANTO-PWY: phosphopantothenate biosynthesis I|g__Lachnospiraceae_noname.s__Lachnospiraceae_bacterium_5_1_63FAA	0.00068373	0.000106123	-2.68768	-11.8581
PWY-6387: UDP-N-acetylmuramoyl-pentapeptide biosynthesis I (meso-diaminopimelate containing)|g__Lachnospiraceae_noname.s__Lachnospiraceae_bacterium_3_1_46FAA	0.000131557	1.99019e-05	-2.72471	-14.2544
GLYCOGENSYNTH-PWY: glycogen biosynthesis I (from ADP-D-Glucose)|g__Anaerostipes.s__Anaerostipes_hadrus	0.00100468	0.000148146	-2.76164	-11.3399
PWY-6737: starch degradation V|g__Ruminococcus.s__Ruminococcus_bromii	0.00293138	0.000430584	-2.76721	-9.79781
PWY-6151: S-adenosyl-L-methionine cycle I|g__Lachnospiraceae_noname.s__Lachnospiraceae_bacterium_5_1_63FAA	0.000549477	7.66074e-05	-2.8425	-12.2509
PWY-6151: S-adenosyl-L-methionine cycle I|g__Ruminococcus.s__Ruminococcus_bromii	0.0030901	0.00043073	-2.8428	-9.75953
THISYNARA-PWY: superpathway of thiamin diphosphate biosynthesis III (eukaryotes)|g__Anaerostipes.s__Anaerostipes_hadrus	0.000476382	6.61585e-05	-2.84812	-12.4597
PWY-621: sucrose degradation III (sucrose invertase)|g__Lachnospiraceae_noname.s__Lachnospiraceae_bacterium_5_1_63FAA	0.00100119	0.000138799	-2.85065	-11.3894
PWY-6124: inosine-5'-phosphate biosynthesis II|g__Lachnospiraceae_noname.s__Lachnospiraceae_bacterium_5_1_63FAA	0.00042796	5.65395e-05	-2.92014	-12.6503
PWY-7221: guanosine ribonucleotides de novo biosynthesis|g__Eubacterium.s__Eubacterium_rectale	0.00964218	0.00123887	-2.96033	-8.17659
NONMEVIPP-PWY: methylerythritol phosphate pathway I|g__Eubacterium.s__Eubacterium_rectale	0.00902381	0.00115092	-2.97094	-8.27752
PWY-6121: 5-aminoimidazole ribonucleotide biosynthesis I|g__Lachnospiraceae_noname.s__Lachnospiraceae_bacterium_5_1_63FAA	0.000430074	5.4457e-05	-2.98139	-12.6738
PWY-5304: superpathway of sulfur oxidation (Acidianus ambivalens)|g__Ruminococcus.s__Ruminococcus_bromii	0.00286399	0.000357303	-3.00281	-9.94916
PWY-5667: CDP-diacylglycerol biosynthesis I|g__Eubacterium.s__Eubacterium_rectale	0.00943143	0.00112477	-3.06784	-8.26223
PWY0-1319: CDP-diacylglycerol biosynthesis II|g__Eubacterium.s__Eubacterium_rectale	0.00943143	0.00112477	-3.06784	-8.26223
PWY-7357: thiamin formation from pyrithiamine and oxythiamine (yeast)|g__Lachnospiraceae_noname.s__Lachnospiraceae_bacterium_5_1_63FAA	0.000534891	6.31569e-05	-3.08223	-12.4096
HOMOSER-METSYN-PWY: L-methionine biosynthesis I|g__Ruminococcus.s__Ruminococcus_bromii	0.00425558	0.000499378	-3.09115	-9.422
COBALSYN-PWY: adenosylcobalamin salvage from cobinamide I|g__Eubacterium.s__Eubacterium_rectale	0.00973192	0.00111605	-3.12432	-8.24522
PWY-5104: L-isoleucine biosynthesis IV|g__Lachnospiraceae_noname.s__Lachnospiraceae_bacterium_5_1_63FAA	0.000614558	7.03568e-05	-3.12679	-12.2316
PWY-6151: S-adenosyl-L-methionine cycle I|g__Eubacterium.s__Eubacterium_rectale	0.0132029	0.00148381	-3.15347	-7.81974
PWY-7111: pyruvate fermentation to isobutanol (engineered)|g__Ruminococcus.s__Ruminococcus_bromii	0.00455522	0.000497201	-3.19562	-9.37607
VALSYN-PWY: L-valine biosynthesis|g__Ruminococcus.s__Ruminococcus_bromii	0.00455522	0.000497201	-3.19562	-9.37607
COA-PWY-1: coenzyme A biosynthesis II (mammalian)|g__Eubacterium.s__Eubacterium_rectale	0.0102917	0.00112084	-3.19883	-8.20179
PWY-5097: L-lysine biosynthesis VI|g__Eubacterium.s__Eubacterium_rectale	0.010842	0.00117825	-3.20191	-8.12818
COMPLETE-ARO-PWY: superpathway of aromatic amino acid biosynthesis|g__Eubacterium.s__Eubacterium_rectale	0.0122553	0.00132159	-3.21305	-7.95698
PWY-5973: cis-vaccenate biosynthesis|g__Eubacterium.s__Eubacterium_rectale	0.0152038	0.00163794	-3.21448	-7.64666
PWY-6387: UDP-N-acetylmuramoyl-pentapeptide biosynthesis I (meso-diaminopimelate containing)|g__Eubacterium.s__Eubacterium_rectale	0.0112264	0.00119872	-3.22733	-8.09063
ARO-PWY: chorismate biosynthesis I|g__Eubacterium.s__Eubacterium_rectale	0.0121647	0.00128056	-3.24786	-7.98508
PWY-6163: chorismate biosynthesis from 3-dehydroquinate|g__Eubacterium.s__Eubacterium_rectale	0.014096	0.00145249	-3.27869	-7.78791
PWY-5367: petroselinate biosynthesis|g__Eubacterium.s__Eubacterium_rectale	0.0155926	0.00160066	-3.28413	-7.64506
PWY-6386: UDP-N-acetylmuramoyl-pentapeptide biosynthesis II (lysine-containing)|g__Eubacterium.s__Eubacterium_rectale	0.0119265	0.00121556	-3.29448	-8.03692
PANTO-PWY: phosphopantothenate biosynthesis I|g__Eubacterium.s__Eubacterium_rectale	0.011757	0.00118855	-3.30625	-8.06346
PWY-6122: 5-aminoimidazole ribonucleotide biosynthesis II|g__Ruminococcus.s__Ruminococcus_bromii	0.0022457	0.000219209	-3.35679	-10.477
PWY-6277: superpathway of 5-aminoimidazole ribonucleotide biosynthesis|g__Ruminococcus.s__Ruminococcus_bromii	0.0022457	0.000219209	-3.35679	-10.477
PWY-5686: UMP biosynthesis|g__Eubacterium.s__Eubacterium_rectale	0.0113385	0.0010988	-3.36723	-8.14624
PWY0-1296: purine ribonucleosides degradation|g__Eubacterium.s__Eubacterium_rectale	0.0136446	0.00131877	-3.37107	-7.88106
THISYNARA-PWY: superpathway of thiamin diphosphate biosynthesis III (eukaryotes)|g__Lachnospiraceae_noname.s__Lachnospiraceae_bacterium_5_1_63FAA	0.000499371	4.79093e-05	-3.38173	-12.6585
PWY-7323: superpathway of GDP-mannose-derived O-antigen building blocks biosynthesis|g__Bacteroides.s__Bacteroides_xylanisolvens	0.0018789	0.000180238	-3.38192	-10.7469
PWY-1042: glycolysis IV (plant cytosol)|g__Anaerostipes.s__Anaerostipes_hadrus	0.00125351	0.00012016	-3.38294	-11.3313
DAPLYSINESYN-PWY: L-lysine biosynthesis I|unclassified	0.000526231	4.99767e-05	-3.39637	-12.5902
PYRIDNUCSYN-PWY: NAD biosynthesis I (from aspartate)|g__Ruminococcus.s__Ruminococcus_bromii	0.00284896	0.000259807	-3.45492	-10.1828
PWY-6121: 5-aminoimidazole ribonucleotide biosynthesis I|g__Ruminococcus.s__Ruminococcus_bromii	0.00232756	0.000211142	-3.46254	-10.4782
PWY0-781: aspartate superpathway|unclassified	0.00105166	9.28015e-05	-3.50238	-11.6443
RHAMCAT-PWY: L-rhamnose degradation I|g__Roseburia.s__Roseburia_intestinalis	0.00288324	0.000249647	-3.52973	-10.203
P4-PWY: superpathway of L-lysine. L-threonine and L-methionine biosynthesis I|unclassified	0.00101459	8.77005e-05	-3.53217	-11.711
CALVIN-PWY: Calvin-Benson-Bassham cycle|g__Ruminococcus.s__Ruminococcus_bromii	0.003668	0.000309568	-3.56666	-9.87412
PWY-1042: glycolysis IV (plant cytosol)|g__Ruminococcus.s__Ruminococcus_bromii	0.00508079	0.000424653	-3.5807	-9.41108
NONOXIPENT-PWY: pentose phosphate pathway (non-oxidative branch)|g__Ruminococcus.s__Ruminococcus_bromii	0.00411612	0.000342143	-3.58862	-9.71881
PWY-5667: CDP-diacylglycerol biosynthesis I|g__Ruminococcus.s__Ruminococcus_bromii	0.00240551	0.000185494	-3.6969	-10.5479
PWY0-1319: CDP-diacylglycerol biosynthesis II|g__Ruminococcus.s__Ruminococcus_bromii	0.00240551	0.000185494	-3.6969	-10.5479
PWY-5686: UMP biosynthesis|g__Ruminococcus.s__Ruminococcus_bromii	0.00316784	0.000219227	-3.853	-10.2288
PWY0-1296: purine ribonucleosides degradation|g__Roseburia.s__Roseburia_intestinalis	0.00361259	0.00023866	-3.92	-10.0728
RHAMCAT-PWY: L-rhamnose degradation I|g__Faecalibacterium.s__Faecalibacterium_prausnitzii	0.0145753	0.000887117	-4.03826	-8.11946
PWY-7219: adenosine ribonucleotides de novo biosynthesis|g__Ruminococcus.s__Ruminococcus_bromii	0.00430371	0.00025889	-4.05517	-9.88779
PWY-5188: tetrapyrrole biosynthesis I (from glutamate)|g__Ruminococcus.s__Ruminococcus_bromii	0.00338186	0.000193007	-4.13109	-10.2735
PWY-7221: guanosine ribonucleotides de novo biosynthesis|g__Ruminococcus.s__Ruminococcus_bromii	0.0028716	0.000152395	-4.23597	-10.5619
PYRIDNUCSYN-PWY: NAD biosynthesis I (from aspartate)|g__Roseburia.s__Roseburia_intestinalis	0.00369951	0.000195738	-4.24033	-10.1986
SER-GLYSYN-PWY: superpathway of L-serine and glycine biosynthesis I|g__Ruminococcus.s__Ruminococcus_bromii	0.00388375	0.000205063	-4.24332	-10.13
PWY-7357: thiamin formation from pyrithiamine and oxythiamine (yeast)|g__Ruminococcus.s__Ruminococcus_bromii	0.00317177	0.000165458	-4.26075	-10.4309
SER-GLYSYN-PWY: superpathway of L-serine and glycine biosynthesis I|g__Roseburia.s__Roseburia_intestinalis	0.00395296	0.000205827	-4.26343	-10.1146
PWY-5695: urate biosynthesis/inosine 5'-phosphate degradation|g__Roseburia.s__Roseburia_intestinalis	0.00399184	0.000203168	-4.29631	-10.1169
COA-PWY: coenzyme A biosynthesis I|g__Roseburia.s__Roseburia_intestinalis	0.00460276	0.000226665	-4.34386	-9.93522
COA-PWY-1: coenzyme A biosynthesis II (mammalian)|g__Roseburia.s__Roseburia_intestinalis	0.0047152	0.000230759	-4.35286	-9.90489
VALSYN-PWY: L-valine biosynthesis|g__Roseburia.s__Roseburia_intestinalis	0.00784277	0.000382764	-4.35684	-9.17284
PWY-5384: sucrose degradation IV (sucrose phosphorylase)|g__Roseburia.s__Roseburia_intestinalis	0.00623566	0.000291376	-4.41959	-9.53504
PWY-5104: L-isoleucine biosynthesis IV|g__Roseburia.s__Roseburia_intestinalis	0.00708123	0.000313127	-4.49918	-9.39138
PWY-5097: L-lysine biosynthesis VI|g__Roseburia.s__Roseburia_intestinalis	0.00492499	0.000206045	-4.57909	-9.95521
CALVIN-PWY: Calvin-Benson-Bassham cycle|g__Anaerostipes.s__Anaerostipes_hadrus	0.000772493	3.16565e-05	-4.60895	-12.6427
PWY-5667: CDP-diacylglycerol biosynthesis I|g__Roseburia.s__Roseburia_intestinalis	0.00414338	0.000169519	-4.61129	-10.2206
PWY0-1319: CDP-diacylglycerol biosynthesis II|g__Roseburia.s__Roseburia_intestinalis	0.00414338	0.000169519	-4.61129	-10.2206
PWY-6121: 5-aminoimidazole ribonucleotide biosynthesis I|g__Roseburia.s__Roseburia_intestinalis	0.00537564	0.000219852	-4.61183	-9.84526
PWY-5659: GDP-mannose biosynthesis|g__Roseburia.s__Roseburia_intestinalis	0.00704999	0.000288193	-4.61251	-9.45442
PWY-6122: 5-aminoimidazole ribonucleotide biosynthesis II|g__Roseburia.s__Roseburia_intestinalis	0.00525134	0.000213608	-4.61965	-9.88292
PWY-6277: superpathway of 5-aminoimidazole ribonucleotide biosynthesis|g__Roseburia.s__Roseburia_intestinalis	0.00525134	0.000213608	-4.61965	-9.88292
PWY-7221: guanosine ribonucleotides de novo biosynthesis|g__Roseburia.s__Roseburia_intestinalis	0.00492602	0.000200159	-4.6212	-9.97596
PWY-6163: chorismate biosynthesis from 3-dehydroquinate|g__Roseburia.s__Roseburia_intestinalis	0.00680832	0.000260508	-4.7079	-9.55243
PWY-7208: superpathway of pyrimidine nucleobases salvage|g__Roseburia.s__Roseburia_intestinalis	0.00741239	0.00028278	-4.71219	-9.43194
PWY66-422: D-galactose degradation V (Leloir pathway)|g__Roseburia.s__Roseburia_intestinalis	0.00826011	0.000314435	-4.71533	-9.27729
NONMEVIPP-PWY: methylerythritol phosphate pathway I|g__Roseburia.s__Roseburia_intestinalis	0.00470681	0.000177936	-4.72532	-10.0937
NONOXIPENT-PWY: pentose phosphate pathway (non-oxidative branch)|g__Roseburia.s__Roseburia_intestinalis	0.00861683	0.00032272	-4.7388	-9.22803
ARO-PWY: chorismate biosynthesis I|g__Roseburia.s__Roseburia_intestinalis	0.00714149	0.00026447	-4.75505	-9.50708
SALVADEHYPOX-PWY: adenosine nucleotides degradation II|g__Roseburia.s__Roseburia_intestinalis	0.00380089	0.000138988	-4.7733	-10.4261
PWY-5100: pyruvate fermentation to acetate and lactate II|g__Roseburia.s__Roseburia_intestinalis	0.00744268	0.000269413	-4.78793	-9.46393
COBALSYN-PWY: adenosylcobalamin salvage from cobinamide I|g__Roseburia.s__Roseburia_intestinalis	0.00689987	0.000247216	-4.80273	-9.58058
PWY-6151: S-adenosyl-L-methionine cycle I|g__Roseburia.s__Roseburia_intestinalis	0.00502757	0.000179969	-4.80404	-10.0379
PWY-6317: galactose degradation I (Leloir pathway)|g__Roseburia.s__Roseburia_intestinalis	0.00826011	0.00029328	-4.81581	-9.32753
PWY-6608: guanosine nucleotides degradation III|g__Roseburia.s__Roseburia_intestinalis	0.00384418	0.000135834	-4.82276	-10.4345
ASPASN-PWY: superpathway of L-aspartate and L-asparagine biosynthesis|g__Roseburia.s__Roseburia_intestinalis	0.00435792	0.000148864	-4.87157	-10.2779
PWY-7219: adenosine ribonucleotides de novo biosynthesis|g__Roseburia.s__Roseburia_intestinalis	0.0109948	0.000373952	-4.87783	-8.94594
COMPLETE-ARO-PWY: superpathway of aromatic amino acid biosynthesis|g__Roseburia.s__Roseburia_intestinalis	0.00799881	0.000269517	-4.89134	-9.41167
PANTO-PWY: phosphopantothenate biosynthesis I|g__Roseburia.s__Roseburia_intestinalis	0.00655888	0.00022076	-4.8929	-9.69878
PWY-7357: thiamin formation from pyrithiamine and oxythiamine (yeast)|g__Roseburia.s__Roseburia_intestinalis	0.0077426	0.000259033	-4.90161	-9.46377
PWY-6737: starch degradation V|g__Roseburia.s__Roseburia_intestinalis	0.0116632	0.000383839	-4.92531	-8.88455
TRPSYN-PWY: L-tryptophan biosynthesis|g__Roseburia.s__Roseburia_intestinalis	0.00582045	0.000189309	-4.94232	-9.89581
PWY-6527: stachyose degradation|g__Roseburia.s__Roseburia_intestinalis	0.00780801	0.000253585	-4.94441	-9.47304
GLYCOGENSYNTH-PWY: glycogen biosynthesis I (from ADP-D-Glucose)|g__Roseburia.s__Roseburia_intestinalis	0.00816133	0.000251984	-5.0174	-9.44568
DTDPRHAMSYN-PWY: dTDP-L-rhamnose biosynthesis I|g__Roseburia.s__Roseburia_intestinalis	0.00884483	0.000248366	-5.15429	-9.3981

## Sheet: unstratified GB changes
Table S4b: Gastric Bypass metagenomic unstratified changes.
Pathways	Time0.mean	Time6.mean	M (log2 fold change)	A (Log2 Abundance mean)
PWY-2723: trehalose degradation V	2.67355e-05	0.000928763	5.11848	-12.6316
PWY-5173: superpathway of acetyl-CoA biosynthesis	8.7312e-05	0.00219571	4.65236	-11.1573
AST-PWY: L-arginine degradation II (AST pathway)	2.46097e-05	0.000529352	4.42693	-13.097
PWY-5198: factor 420 biosynthesis	1.34189e-05	0.000269013	4.32534	-14.0227
PWY-7409: phospholipid remodeling (phosphatidylethanolamine. yeast)	6.82237e-05	0.00116537	4.09437	-11.7922
GLUDEG-I-PWY: GABA shunt	0.000216548	0.00320896	3.88934	-10.2284
KDO-NAGLIPASYN-PWY: superpathway of (Kdo)2-lipid A biosynthesis	6.72401e-05	0.000726736	3.43404	-12.1433
PWY-7286: 7-(3-amino-3-carboxypropyl)-wyosine biosynthesis	1.74812e-05	0.000178392	3.35117	-14.1282
PWY-6165: chorismate biosynthesis II (archaea)	5.52677e-05	0.000554091	3.32562	-12.4804
PWY-6386: UDP-N-acetylmuramoyl-pentapeptide biosynthesis II (lysine-containing)	0.0573258	0.474375	3.04877	-2.60029
PWY-7204: pyridoxal 5'-phosphate salvage II (plants)	0.000561554	0.00461835	3.03988	-9.27835
PWY0-1241: ADP-L-glycero-&beta;-D-manno-heptose biosynthesis	0.00019944	0.00126726	2.66769	-10.9579
PWY-5464: superpathway of cytosolic glycolysis (plants). pyruvate dehydrogenase and TCA cycle	0.000789857	0.0049258	2.6407	-8.98577
PWY-4702: phytate degradation I	0.000671121	0.00384966	2.52009	-9.2811
RIBOSYN2-PWY: flavin biosynthesis I (bacteria and plants)	0.00335263	0.0177226	2.40222	-7.01938
P23-PWY: reductive TCA cycle I	0.000577119	0.00302749	2.39118	-9.56325
PWY-6803: phosphatidylcholine acyl editing	0.000397269	0.00190331	2.26032	-10.1674
PWY-6174: mevalonate pathway II (archaea)	6.17372e-05	0.000295005	2.25653	-12.8552
GLYCOLYSIS-TCA-GLYOX-BYPASS: superpathway of glycolysis. pyruvate dehydrogenase. TCA. and glyoxylate bypass	0.00149914	0.00567678	1.92094	-8.42118
GLYCOLYSIS: glycolysis I (from glucose 6-phosphate)	0.00705672	0.0263731	1.902	-6.19579
PWY66-400: glycolysis VI (metazoan)	0.00768005	0.0286418	1.89894	-6.0752
PWY-6859: all-trans-farnesol biosynthesis	0.000802273	0.00287215	1.83997	-9.36364
PWY-5484: glycolysis II (from fructose 6-phosphate)	0.00673472	0.0235118	1.8037	-6.31232
PWY-6270: isoprene biosynthesis I	0.00703603	0.0241419	1.77871	-6.26167
LACTOSECAT-PWY: lactose and galactose degradation I	0.00121656	0.00415383	1.77163	-8.79716
PWY-6285: superpathway of fatty acids biosynthesis (E. coli)	0.001549	0.00525286	1.76177	-8.45357
PWY-7560: methylerythritol phosphate pathway II	0.00672022	0.0219312	1.7064	-6.36408
PWY-6628: superpathway of L-phenylalanine biosynthesis	0.00344344	0.0112274	1.7051	-7.32938
FASYN-INITIAL-PWY: superpathway of fatty acid biosynthesis initiation (E. coli)	0.000923375	0.00296181	1.68149	-9.24005
PWY-7254: TCA cycle VII (acetate-producers)	0.000766727	0.0024509	1.67653	-9.51074
PWY-7388: octanoyl-[acyl-carrier protein] biosynthesis (mitochondria. yeast)	0.000885503	0.00270189	1.6094	-9.33651
PWY-5971: palmitate biosynthesis II (bacteria and plants)	0.00185422	0.00561156	1.59759	-8.27618
FASYN-ELONG-PWY: fatty acid elongation -- saturated	0.00157208	0.00472061	1.58629	-8.51996
PWY-7210: pyrimidine deoxyribonucleotides biosynthesis from CTP	0.00391081	0.00118463	-1.72303	-8.85983
PWY-5189: tetrapyrrole biosynthesis II (from glycine)	0.00750609	0.00213786	-1.81189	-7.96367
PWY-7198: pyrimidine deoxyribonucleotides de novo biosynthesis IV	0.00328156	0.000845593	-1.95635	-9.22958
PWY-7237: myo-. chiro- and scillo-inositol degradation	0.00900466	0.00227595	-1.9842	-7.78721
PWY0-1298: superpathway of pyrimidine deoxyribonucleosides degradation	0.00969019	0.002224	-2.12337	-7.75094
PWY-6590: superpathway of Clostridium acetobutylicum acidogenic fermentation	0.00834839	0.00190557	-2.13127	-7.96992
CENTFERM-PWY: pyruvate fermentation to butanoate	0.00666485	0.00138202	-2.26979	-8.36411
PWY-7235: superpathway of ubiquinol-6 biosynthesis (eukaryotic)	0.00115483	0.000214073	-2.4315	-10.9739
PWY-6471: peptidoglycan biosynthesis IV (Enterococcus faecium)	0.00538475	0.000997102	-2.43307	-8.75344
PWY-5941: glycogen degradation II (eukaryotic)	0.00825161	0.00152379	-2.43701	-8.13962
PWY490-3: nitrate reduction VI (assimilatory)	0.0013252	0.000236009	-2.4893	-10.8042
PWY-7371: 1.4-dihydroxy-6-naphthoate biosynthesis II	0.00145593	0.000256756	-2.50347	-10.6756
GOLPDLCAT-PWY: superpathway of glycerol degradation to 1.3-propanediol	0.00704913	0.00122269	-2.52739	-8.41203
PWY-6531: mannitol cycle	0.00346337	0.00054155	-2.67701	-9.51211
PWY-7209: superpathway of pyrimidine ribonucleosides degradation	0.000782801	0.000112656	-2.79672	-11.7174
PWY-7446: sulfoglycolysis	0.000438192	5.69268e-05	-2.94438	-12.6283
PWY-5304: superpathway of sulfur oxidation (Acidianus ambivalens)	0.00759687	0.000951083	-2.99776	-8.53926
AEROBACTINSYN-PWY: aerobactin biosynthesis	0.000223901	2.54896e-05	-3.13488	-13.6923
PWY-1861: formaldehyde assimilation II (RuMP Cycle)	0.00253206	0.000208538	-3.60193	-10.4264

## Sheet: stratified SG changes
Table S4c: Sleeve Gastrectomy metagenomic stratified changes.
Pathways	T0.mean	T6.mean	M (log2 fold change)	A (Log2 Abundance mean)
PWY-6737: starch degradation V|g__Alistipes.s__Alistipes_finegoldii	9.01987e-06	0.00087248	6.59587	-13.4605
PWY-3841: folate transformations II|g__Streptococcus.s__Streptococcus_salivarius	1.95736e-05	0.00117891	5.9124	-12.6845
PWY-6151: S-adenosyl-L-methionine cycle I|g__Streptococcus.s__Streptococcus_salivarius	2.37823e-05	0.00129322	5.76493	-12.4773
PWY-7228: superpathway of guanosine nucleotides de novo biosynthesis I|g__Streptococcus.s__Streptococcus_salivarius	3.1668e-05	0.00152823	5.59269	-12.1503
PWY-5659: GDP-mannose biosynthesis|g__Alistipes.s__Alistipes_finegoldii	2.33268e-05	0.000857532	5.20013	-12.7876
VALSYN-PWY: L-valine biosynthesis|g__Streptococcus.s__Streptococcus_salivarius	4.1057e-05	0.00128684	4.97005	-12.087
PWY-5138: unsaturated. even numbered fatty acid &beta;-oxidation|g__Escherichia.s__Escherichia_coli	8.16623e-06	0.000247281	4.92034	-14.4417
PWY-5136: fatty acid &beta;-oxidation II (peroxisome)|g__Escherichia.s__Escherichia_coli	9.29498e-06	0.000273406	4.87845	-14.2759
PWY-7219: adenosine ribonucleotides de novo biosynthesis|g__Alistipes.s__Alistipes_finegoldii	3.6912e-05	0.00102872	4.80062	-12.3252
PWY-5686: UMP biosynthesis|g__Alistipes.s__Alistipes_finegoldii	2.90855e-05	0.00080541	4.79135	-12.6737
PWY-5667: CDP-diacylglycerol biosynthesis I|g__Alistipes.s__Alistipes_finegoldii	3.72262e-05	0.00101195	4.76468	-12.331
PWY0-1319: CDP-diacylglycerol biosynthesis II|g__Alistipes.s__Alistipes_finegoldii	3.72262e-05	0.00101195	4.76468	-12.331
FAO-PWY: fatty acid &beta;-oxidation I|g__Escherichia.s__Escherichia_coli	1.16443e-05	0.000309178	4.73074	-14.0246
PWY-7219: adenosine ribonucleotides de novo biosynthesis|g__Bacteroides.s__Bacteroides_cellulosilyticus	0.000413636	0.0106101	4.68093	-8.89889
PWY-7221: guanosine ribonucleotides de novo biosynthesis|g__Streptococcus.s__Streptococcus_salivarius	7.07917e-05	0.00177577	4.64872	-11.4617
PWY-7229: superpathway of adenosine nucleotides de novo biosynthesis I|g__Bacteroides.s__Bacteroides_cellulosilyticus	0.000414655	0.0103339	4.63933	-8.91614
PWY0-1296: purine ribonucleosides degradation|g__Eubacterium.s__Eubacterium_eligens	5.05168e-05	0.00122918	4.60479	-11.9705
PWY-7219: adenosine ribonucleotides de novo biosynthesis|g__Streptococcus.s__Streptococcus_salivarius	6.35437e-05	0.00149063	4.55203	-11.6659
PANTO-PWY: phosphopantothenate biosynthesis I|g__Alistipes.s__Alistipes_finegoldii	4.83038e-05	0.00111088	4.52342	-12.0758
UDPNAGSYN-PWY: UDP-N-acetyl-D-glucosamine biosynthesis I|g__Streptococcus.s__Streptococcus_salivarius	5.3364e-05	0.00122509	4.52087	-11.9333
PWY-6126: superpathway of adenosine nucleotides de novo biosynthesis II|g__Bacteroides.s__Bacteroides_cellulosilyticus	0.000433942	0.00947972	4.44927	-8.94557
PWY-6700: queuosine biosynthesis|g__Akkermansia.s__Akkermansia_muciniphila	2.4854e-05	0.000542082	4.44696	-13.0727
PWY-7221: guanosine ribonucleotides de novo biosynthesis|g__Bacteroides.s__Bacteroides_cellulosilyticus	0.000401583	0.0087298	4.44218	-9.06092
PWY-6700: queuosine biosynthesis|g__Bacteroides.s__Bacteroides_cellulosilyticus	0.00037936	0.00796254	4.39159	-9.16835
PWY-7228: superpathway of guanosine nucleotides de novo biosynthesis I|g__Bacteroides.s__Bacteroides_cellulosilyticus	0.000436281	0.00903865	4.37278	-8.97607
PWY-6936: seleno-amino acid biosynthesis|g__Lactococcus.s__Lactococcus_lactis	1.84797e-05	0.000380535	4.36401	-13.5417
HOMOSER-METSYN-PWY: L-methionine biosynthesis I|g__Lactococcus.s__Lactococcus_lactis	2.07178e-05	0.000420999	4.34487	-13.3863
PWY-7219: adenosine ribonucleotides de novo biosynthesis|g__Lactococcus.s__Lactococcus_lactis	2.00337e-05	0.000401994	4.32668	-13.4439
PWY-7111: pyruvate fermentation to isobutanol (engineered)|g__Bacteroides.s__Bacteroides_cellulosilyticus	0.000429471	0.00861392	4.32604	-9.02213
VALSYN-PWY: L-valine biosynthesis|g__Bacteroides.s__Bacteroides_cellulosilyticus	0.000429471	0.00861392	4.32604	-9.02213
PWY-7208: superpathway of pyrimidine nucleobases salvage|g__Streptococcus.s__Streptococcus_salivarius	7.99097e-05	0.00157763	4.30324	-11.4596
COA-PWY-1: coenzyme A biosynthesis II (mammalian)|g__Bacteroides.s__Bacteroides_cellulosilyticus	0.000372947	0.00687959	4.20528	-9.2861
PWY-6122: 5-aminoimidazole ribonucleotide biosynthesis II|g__Streptococcus.s__Streptococcus_salivarius	6.46752e-05	0.00117759	4.18648	-11.8232
PWY-6277: superpathway of 5-aminoimidazole ribonucleotide biosynthesis|g__Streptococcus.s__Streptococcus_salivarius	6.46752e-05	0.00117759	4.18648	-11.8232
PWY-5667: CDP-diacylglycerol biosynthesis I|g__Bacteroides.s__Bacteroides_cellulosilyticus	0.000410775	0.00708635	4.10862	-9.19505
PWY0-1319: CDP-diacylglycerol biosynthesis II|g__Bacteroides.s__Bacteroides_cellulosilyticus	0.000410775	0.00708635	4.10862	-9.19505
PWY-6121: 5-aminoimidazole ribonucleotide biosynthesis I|g__Streptococcus.s__Streptococcus_salivarius	6.36493e-05	0.00107345	4.07597	-11.9015
PWY-6703: preQ0 biosynthesis|g__Bacteroides.s__Bacteroides_cellulosilyticus	0.000345747	0.00549819	3.99117	-9.50241
1CMET2-PWY: N10-formyl-tetrahydrofolate biosynthesis|g__Bacteroides.s__Bacteroides_cellulosilyticus	0.00040805	0.00629712	3.94788	-9.28503
PWY-5686: UMP biosynthesis|g__Streptococcus.s__Streptococcus_parasanguinis	4.23209e-05	0.00063402	3.90508	-12.5757
THISYNARA-PWY: superpathway of thiamin diphosphate biosynthesis III (eukaryotes)|g__Bacteroides.s__Bacteroides_sp_2_1_22	1.05125e-05	0.000155969	3.89108	-14.592
PWY-7220: adenosine deoxyribonucleotides de novo biosynthesis II|g__Bacteroides.s__Bacteroides_cellulosilyticus	0.000576519	0.00851297	3.88422	-8.81823
PWY-7222: guanosine deoxyribonucleotides de novo biosynthesis II|g__Bacteroides.s__Bacteroides_cellulosilyticus	0.000576519	0.00851297	3.88422	-8.81823
P125-PWY: superpathway of (R.R)-butanediol biosynthesis|g__Lactococcus.s__Lactococcus_lactis	2.71933e-05	0.000393406	3.8547	-13.239
PWY-5097: L-lysine biosynthesis VI|g__Akkermansia.s__Akkermansia_muciniphila	5.50303e-05	0.000784149	3.83283	-12.233
PWY-5686: UMP biosynthesis|g__Bacteroides.s__Bacteroides_cellulosilyticus	0.000369037	0.00517847	3.81069	-9.4986
PWY-2942: L-lysine biosynthesis III|g__Coprobacter.s__Coprobacter_fastidiosus	2.98984e-05	0.000412372	3.7858	-13.1367
PWY-3841: folate transformations II|g__Bacteroides.s__Bacteroides_cellulosilyticus	0.000421667	0.00578765	3.7788	-9.32221
PWY-7242: D-fructuronate degradation|g__Eubacterium.s__Eubacterium_rectale	1.89467e-05	0.000259031	3.77311	-13.8011
GLUTORN-PWY: L-ornithine biosynthesis|g__Lactococcus.s__Lactococcus_lactis	2.36294e-05	0.000310053	3.71386	-13.5121
PWY-6305: putrescine biosynthesis IV|g__Methanobrevibacter.s__Methanobrevibacter_smithii	5.9848e-05	0.000774222	3.69337	-12.1817
NONOXIPENT-PWY: pentose phosphate pathway (non-oxidative branch)|g__Eubacterium.s__Eubacterium_eligens	0.000104816	0.00132254	3.65738	-11.3912
PWY-6122: 5-aminoimidazole ribonucleotide biosynthesis II|g__Eubacterium.s__Eubacterium_eligens	0.000109194	0.00135778	3.63628	-11.3427
PWY-6277: superpathway of 5-aminoimidazole ribonucleotide biosynthesis|g__Eubacterium.s__Eubacterium_eligens	0.000109194	0.00135778	3.63628	-11.3427
ARGININE-SYN4-PWY: L-ornithine de novo biosynthesis|g__Bacteroides.s__Bacteroides_cellulosilyticus	0.000426866	0.00522722	3.61419	-9.38684
PWY-7197: pyrimidine deoxyribonucleotide phosphorylation|g__Streptococcus.s__Streptococcus_salivarius	0.000138406	0.00168879	3.609	-11.0143
PANTO-PWY: phosphopantothenate biosynthesis I|g__Bacteroides.s__Bacteroides_cellulosilyticus	0.000370731	0.00441847	3.5751	-9.60979
PWY-2942: L-lysine biosynthesis III|g__Bacteroides.s__Bacteroides_cellulosilyticus	0.00039112	0.0046483	3.57102	-9.53459
PWY-6163: chorismate biosynthesis from 3-dehydroquinate|g__Eubacterium.s__Eubacterium_eligens	0.000124739	0.00147914	3.56777	-11.1849
ARO-PWY: chorismate biosynthesis I|g__Eubacterium.s__Eubacterium_eligens	0.00011105	0.00131453	3.56527	-11.3539
PWY-7111: pyruvate fermentation to isobutanol (engineered)|g__Streptococcus.s__Streptococcus_salivarius	0.000134744	0.00159151	3.5621	-11.0764
PWY-7229: superpathway of adenosine nucleotides de novo biosynthesis I|g__Streptococcus.s__Streptococcus_salivarius	0.000111613	0.00128941	3.53013	-11.3641
PWY-6608: guanosine nucleotides degradation III|g__Odoribacter.s__Odoribacter_splanchnicus	0.000307756	0.00352703	3.51859	-9.90663
PWY-5097: L-lysine biosynthesis VI|g__Coprobacter.s__Coprobacter_fastidiosus	3.4882e-05	0.000399441	3.51743	-13.0484
PWY-7221: guanosine ribonucleotides de novo biosynthesis|g__Eubacterium.s__Eubacterium_eligens	0.000120023	0.00135848	3.50061	-11.2741
PWY-5097: L-lysine biosynthesis VI|g__Bacteroides.s__Bacteroides_cellulosilyticus	0.000382656	0.00431432	3.49501	-9.60416
PWY-561: superpathway of glyoxylate cycle and fatty acid degradation|g__Escherichia.s__Escherichia_coli	2.03803e-05	0.000225339	3.46685	-13.849
COMPLETE-ARO-PWY: superpathway of aromatic amino acid biosynthesis|g__Eubacterium.s__Eubacterium_eligens	0.000126592	0.00135286	3.41776	-11.2386
PWY-7219: adenosine ribonucleotides de novo biosynthesis|g__Eubacterium.s__Eubacterium_eligens	0.000155538	0.00164785	3.40525	-10.9478
PWY-7111: pyruvate fermentation to isobutanol (engineered)|g__Eubacterium.s__Eubacterium_eligens	0.00011334	0.00119729	3.40104	-11.4065
VALSYN-PWY: L-valine biosynthesis|g__Eubacterium.s__Eubacterium_eligens	0.00011334	0.00119729	3.40104	-11.4065
PWY-5667: CDP-diacylglycerol biosynthesis I|g__Coprobacter.s__Coprobacter_fastidiosus	4.63977e-05	0.000489047	3.39785	-12.6967
PWY0-1319: CDP-diacylglycerol biosynthesis II|g__Coprobacter.s__Coprobacter_fastidiosus	4.63977e-05	0.000489047	3.39785	-12.6967
PWY-6122: 5-aminoimidazole ribonucleotide biosynthesis II|g__Akkermansia.s__Akkermansia_muciniphila	7.34862e-05	0.000773352	3.39558	-12.0344
PWY-6277: superpathway of 5-aminoimidazole ribonucleotide biosynthesis|g__Akkermansia.s__Akkermansia_muciniphila	7.34862e-05	0.000773352	3.39558	-12.0344
DTDPRHAMSYN-PWY: dTDP-L-rhamnose biosynthesis I|g__Escherichia.s__Escherichia_coli	4.14539e-05	0.000435913	3.39446	-12.8609
PWY-6467: Kdo transfer to lipid IVA III (Chlamydia)|g__Escherichia.s__Escherichia_coli	2.13435e-05	0.000220683	3.37011	-13.8308
UNINTEGRATED|g__Alistipes.s__Alistipes_finegoldii	0.0965139	0.989752	3.35826	-1.69399
PEPTIDOGLYCANSYN-PWY: peptidoglycan biosynthesis I (meso-diaminopimelate containing)|g__Streptococcus.s__Streptococcus_parasanguinis	6.81187e-05	0.00069444	3.34973	-12.1667
PWY-6121: 5-aminoimidazole ribonucleotide biosynthesis I|g__Akkermansia.s__Akkermansia_muciniphila	8.42064e-05	0.000839542	3.3176	-11.8769
SER-GLYSYN-PWY: superpathway of L-serine and glycine biosynthesis I|g__Lactococcus.s__Lactococcus_lactis	3.80957e-05	0.000375143	3.29974	-13.0301
UNINTEGRATED|g__Veillonella.s__Veillonella_atypica	0.00727916	0.0707144	3.28016	-5.46193
PWY-6700: queuosine biosynthesis|g__Odoribacter.s__Odoribacter_splanchnicus	0.000225418	0.00218226	3.27515	-10.4775
PWY66-422: D-galactose degradation V (Leloir pathway)|g__Streptococcus.s__Streptococcus_parasanguinis	3.14055e-05	0.000303479	3.27251	-13.3224
PWY-6151: S-adenosyl-L-methionine cycle I|g__Eubacterium.s__Eubacterium_eligens	0.000157023	0.00149926	3.2552	-11.0091
COA-PWY-1: coenzyme A biosynthesis II (mammalian)|g__Lactococcus.s__Lactococcus_lactis	4.31356e-05	0.000410415	3.25013	-12.8757
COA-PWY: coenzyme A biosynthesis I|g__Lactococcus.s__Lactococcus_lactis	4.31356e-05	0.000410415	3.25013	-12.8757
PWY0-1061: superpathway of L-alanine biosynthesis|g__Streptococcus.s__Streptococcus_parasanguinis	7.33175e-05	0.0006963	3.24748	-12.1117
PWY-5695: urate biosynthesis/inosine 5'-phosphate degradation|g__Odoribacter.s__Odoribacter_splanchnicus	0.000264326	0.00248279	3.23157	-10.2696
PWY-5686: UMP biosynthesis|g__Methanobrevibacter.s__Methanobrevibacter_smithii	4.6112e-05	0.000425089	3.20455	-12.8022
UNINTEGRATED|g__Streptococcus.s__Streptococcus_salivarius	0.0846351	0.759395	3.16552	-1.97984
PANTO-PWY: phosphopantothenate biosynthesis I|g__Coprobacter.s__Coprobacter_fastidiosus	5.25149e-05	0.000468986	3.15875	-12.6375
PWY-5667: CDP-diacylglycerol biosynthesis I|g__Eubacterium.s__Eubacterium_eligens	0.000150886	0.00134581	3.15694	-11.1158
PWY0-1319: CDP-diacylglycerol biosynthesis II|g__Eubacterium.s__Eubacterium_eligens	0.000150886	0.00134581	3.15694	-11.1158
PWY-6151: S-adenosyl-L-methionine cycle I|g__Odoribacter.s__Odoribacter_splanchnicus	0.000202035	0.00179678	3.15274	-10.6967
PWY-7111: pyruvate fermentation to isobutanol (engineered)|g__Lactococcus.s__Lactococcus_lactis	3.16501e-05	0.000277672	3.1331	-13.3809
PWY-6609: adenine and adenosine salvage III|g__Bacteroides.s__Bacteroides_caccae	0.000405545	0.00354745	3.12885	-9.70343
PWY-5941: glycogen degradation II (eukaryotic)|unclassified	0.000980827	0.00857917	3.12877	-8.42933
PWY-2942: L-lysine biosynthesis III|g__Akkermansia.s__Akkermansia_muciniphila	0.000100767	0.0008788	3.12451	-11.7144
TRPSYN-PWY: L-tryptophan biosynthesis|g__Streptococcus.s__Streptococcus_parasanguinis	7.16033e-05	0.000621989	3.11879	-12.2102
PWY-5030: L-histidine degradation III|g__Streptococcus.s__Streptococcus_parasanguinis	2.77711e-05	0.000238331	3.10131	-13.5854
PWY-5103: L-isoleucine biosynthesis III|g__Streptococcus.s__Streptococcus_parasanguinis	4.84675e-05	0.000415831	3.10091	-12.7822
PWY-6387: UDP-N-acetylmuramoyl-pentapeptide biosynthesis I (meso-diaminopimelate containing)|g__Eubacterium.s__Eubacterium_eligens	0.00011844	0.00101515	3.09947	-11.4938
PWY-6386: UDP-N-acetylmuramoyl-pentapeptide biosynthesis II (lysine-containing)|g__Eubacterium.s__Eubacterium_eligens	0.000130219	0.00107959	3.05146	-11.381
PWY0-1586: peptidoglycan maturation (meso-diaminopimelate containing)|g__Odoribacter.s__Odoribacter_splanchnicus	0.000398139	0.00323271	3.0214	-9.78374
PWY-6121: 5-aminoimidazole ribonucleotide biosynthesis I|g__Eubacterium.s__Eubacterium_eligens	0.000132225	0.00107242	3.01981	-11.3748
UNINTEGRATED|g__Bacteroides.s__Bacteroides_cellulosilyticus	1.05905	8.46554	2.99883	1.58219
PWY-5304: superpathway of sulfur oxidation (Acidianus ambivalens)|unclassified	0.000560623	0.00447691	2.9974	-9.30198
PWY-6123: inosine-5'-phosphate biosynthesis I|g__Bacteroides.s__Bacteroides_faecis	0.00040229	0.00316553	2.97614	-9.79141
PWY-7219: adenosine ribonucleotides de novo biosynthesis|g__Alistipes.s__Alistipes_shahii	0.00103536	0.0081319	2.97346	-8.42892
PWY-6609: adenine and adenosine salvage III|g__Odoribacter.s__Odoribacter_splanchnicus	0.000280164	0.00214448	2.93629	-10.3333
BRANCHED-CHAIN-AA-SYN-PWY: superpathway of branched amino acid biosynthesis|g__Akkermansia.s__Akkermansia_muciniphila	0.000135713	0.0010327	2.92779	-11.3833
PWY-7111: pyruvate fermentation to isobutanol (engineered)|g__Bacteroides.s__Bacteroides_caccae	0.000348194	0.0026476	2.92672	-10.0245
VALSYN-PWY: L-valine biosynthesis|g__Bacteroides.s__Bacteroides_caccae	0.000348194	0.0026476	2.92672	-10.0245
PWY-6703: preQ0 biosynthesis|g__Akkermansia.s__Akkermansia_muciniphila	8.29379e-05	0.000628447	2.92169	-12.0968
PWY-6936: seleno-amino acid biosynthesis|g__Methanobrevibacter.s__Methanobrevibacter_smithii	6.8307e-05	0.000516597	2.91893	-12.3781
P42-PWY: incomplete reductive TCA cycle|unclassified	0.00135614	0.010196	2.91042	-8.07107
ILEUSYN-PWY: L-isoleucine biosynthesis I (from threonine)|g__Akkermansia.s__Akkermansia_muciniphila	0.000160914	0.00119344	2.89076	-11.156
VALSYN-PWY: L-valine biosynthesis|g__Akkermansia.s__Akkermansia_muciniphila	0.000160914	0.00119344	2.89076	-11.156
COA-PWY-1: coenzyme A biosynthesis II (mammalian)|g__Bacteroides.s__Bacteroides_caccae	0.000330158	0.00243973	2.88549	-10.1218
PWY-4981: L-proline biosynthesis II (from arginine)|g__Streptococcus.s__Streptococcus_parasanguinis	7.75115e-05	0.000570869	2.88068	-12.2149
CALVIN-PWY: Calvin-Benson-Bassham cycle|g__Odoribacter.s__Odoribacter_splanchnicus	0.00030128	0.00220111	2.86905	-10.2621
LACTOSECAT-PWY: lactose and galactose degradation I|g__Streptococcus.s__Streptococcus_infantis	3.51868e-05	0.000256728	2.86713	-13.361
PWY-6124: inosine-5'-phosphate biosynthesis II|g__Bacteroides.s__Bacteroides_faecis	0.000395705	0.00288487	2.86601	-9.87028
PYRIDNUCSYN-PWY: NAD biosynthesis I (from aspartate)|g__Odoribacter.s__Odoribacter_splanchnicus	0.000284504	0.00205196	2.85048	-10.354
ANAGLYCOLYSIS-PWY: glycolysis III (from glucose)|g__Odoribacter.s__Odoribacter_splanchnicus	0.000277646	0.00200218	2.85025	-10.3893
UNINTEGRATED|g__Streptococcus.s__Streptococcus_australis	0.0133902	0.096161	2.84428	-4.80054
PWY-5100: pyruvate fermentation to acetate and lactate II|g__Lactococcus.s__Lactococcus_lactis	5.47448e-05	0.000390934	2.83613	-12.7389
COA-PWY-1: coenzyme A biosynthesis II (mammalian)|g__Bacteroides.s__Bacteroides_finegoldii	0.000249203	0.00177763	2.83456	-10.5531
PWY-6122: 5-aminoimidazole ribonucleotide biosynthesis II|g__Streptococcus.s__Streptococcus_parasanguinis	0.000107986	0.000766357	2.82717	-11.7633
PWY-6277: superpathway of 5-aminoimidazole ribonucleotide biosynthesis|g__Streptococcus.s__Streptococcus_parasanguinis	0.000107986	0.000766357	2.82717	-11.7633
PWY-5103: L-isoleucine biosynthesis III|g__Akkermansia.s__Akkermansia_muciniphila	0.000127746	0.000903494	2.82224	-11.5233
PANTOSYN-PWY: pantothenate and coenzyme A biosynthesis I|g__Akkermansia.s__Akkermansia_muciniphila	0.000136262	0.000963648	2.82212	-11.4303
HEMESYN2-PWY: heme biosynthesis II (anaerobic)|g__Escherichia.s__Escherichia_coli	3.1443e-05	0.000219634	2.80429	-13.5548
ASPASN-PWY: superpathway of L-aspartate and L-asparagine biosynthesis|g__Odoribacter.s__Odoribacter_splanchnicus	0.000381019	0.00265723	2.80199	-9.95686
PWY-6936: seleno-amino acid biosynthesis|unclassified	0.00470903	0.0327736	2.79903	-6.33084
PWY-7219: adenosine ribonucleotides de novo biosynthesis|g__Bacteroides.s__Bacteroides_finegoldii	0.000311249	0.00212876	2.77387	-10.2627
PENTOSE-P-PWY: pentose phosphate pathway|g__Odoribacter.s__Odoribacter_splanchnicus	0.000298764	0.00202372	2.75993	-10.3287
PWY-1042: glycolysis IV (plant cytosol)|g__Odoribacter.s__Odoribacter_splanchnicus	0.000376514	0.00254322	2.75588	-9.99707
PWY-6609: adenine and adenosine salvage III|g__Bacteroides.s__Bacteroides_finegoldii	0.000203577	0.00137473	2.75551	-10.8844
SO4ASSIM-PWY: sulfate reduction I (assimilatory)|g__Akkermansia.s__Akkermansia_muciniphila	0.000122292	0.000818467	2.74259	-11.6261
PWY-724: superpathway of L-lysine. L-threonine and L-methionine biosynthesis II|g__Methanobrevibacter.s__Methanobrevibacter_smithii	6.7421e-05	0.000449584	2.73732	-12.4878
PWY-6124: inosine-5'-phosphate biosynthesis II|g__Streptococcus.s__Streptococcus_salivarius	0.000180151	0.00120126	2.73727	-11.0699
PWY-6123: inosine-5'-phosphate biosynthesis I|g__Streptococcus.s__Streptococcus_salivarius	0.000188548	0.00125295	2.73233	-11.0066
DTDPRHAMSYN-PWY: dTDP-L-rhamnose biosynthesis I|g__Odoribacter.s__Odoribacter_splanchnicus	0.00052931	0.00351457	2.73116	-9.51802
THRESYN-PWY: superpathway of L-threonine biosynthesis|g__Methanobrevibacter.s__Methanobrevibacter_smithii	5.81901e-05	0.00038565	2.72844	-12.7046
PWY-7219: adenosine ribonucleotides de novo biosynthesis|g__Bacteroides.s__Bacteroides_faecis	0.000576207	0.00381437	2.72679	-9.39773
COA-PWY-1: coenzyme A biosynthesis II (mammalian)|g__Odoribacter.s__Odoribacter_splanchnicus	0.000315225	0.00207615	2.71946	-10.2716
UNINTEGRATED|g__Eubacterium.s__Eubacterium_eligens	0.0904558	0.594541	2.71649	-2.1084
PWY-6700: queuosine biosynthesis|g__Bacteroides.s__Bacteroides_caccae	0.000495347	0.00324429	2.71139	-9.62358
PWY-5686: UMP biosynthesis|g__Akkermansia.s__Akkermansia_muciniphila	9.14515e-05	0.000596599	2.70568	-12.0638
PWY-5188: tetrapyrrole biosynthesis I (from glutamate)|g__Akkermansia.s__Akkermansia_muciniphila	9.80441e-05	0.000639579	2.70562	-11.9634
PWY-3841: folate transformations II|g__Akkermansia.s__Akkermansia_muciniphila	0.000140361	0.000913187	2.70177	-11.4477
ASPASN-PWY: superpathway of L-aspartate and L-asparagine biosynthesis|g__Bacteroides.s__Bacteroides_faecis	0.000425525	0.00276369	2.69928	-9.84883
COA-PWY: coenzyme A biosynthesis I|g__Akkermansia.s__Akkermansia_muciniphila	0.000170413	0.00110378	2.69535	-11.171
PWY-7221: guanosine ribonucleotides de novo biosynthesis|g__Alistipes.s__Alistipes_shahii	0.00121352	0.00784528	2.69262	-8.34027
PWY-2941: L-lysine biosynthesis II|g__Methanobrevibacter.s__Methanobrevibacter_smithii	7.98931e-05	0.000513875	2.68528	-12.2689
COA-PWY-1: coenzyme A biosynthesis II (mammalian)|g__Akkermansia.s__Akkermansia_muciniphila	0.000170413	0.00108462	2.67008	-11.1836
PWY-7111: pyruvate fermentation to isobutanol (engineered)|g__Akkermansia.s__Akkermansia_muciniphila	0.000123376	0.000782018	2.66413	-11.6526
PWY-6700: queuosine biosynthesis|g__Bacteroides.s__Bacteroides_faecis	0.000531361	0.00335597	2.65897	-9.54854
PANTO-PWY: phosphopantothenate biosynthesis I|g__Odoribacter.s__Odoribacter_splanchnicus	0.000313346	0.0019745	2.65566	-10.3121
NONOXIPENT-PWY: pentose phosphate pathway (non-oxidative branch)|g__Odoribacter.s__Odoribacter_splanchnicus	0.000331647	0.00208807	2.65445	-10.2308
PWY0-1296: purine ribonucleosides degradation|g__Streptococcus.s__Streptococcus_salivarius	0.000204371	0.0012851	2.65261	-10.9302
PWY-7221: guanosine ribonucleotides de novo biosynthesis|g__Odoribacter.s__Odoribacter_splanchnicus	0.000266796	0.00167534	2.65065	-10.5467
PWY-6121: 5-aminoimidazole ribonucleotide biosynthesis I|g__Methanobrevibacter.s__Methanobrevibacter_smithii	7.70352e-05	0.00048327	2.64924	-12.3395
PWY-5097: L-lysine biosynthesis VI|g__Odoribacter.s__Odoribacter_splanchnicus	0.000328455	0.0020577	2.64726	-10.2484
PWY-7663: gondoate biosynthesis (anaerobic)|g__Odoribacter.s__Odoribacter_splanchnicus	0.000230562	0.00143769	2.64052	-10.7623
PWY-2942: L-lysine biosynthesis III|g__Odoribacter.s__Odoribacter_splanchnicus	0.000317684	0.00197884	2.63899	-10.3006
PWY-5659: GDP-mannose biosynthesis|g__Alistipes.s__Alistipes_shahii	0.00116467	0.0072493	2.63792	-8.4269
PWY-7221: guanosine ribonucleotides de novo biosynthesis|g__Akkermansia.s__Akkermansia_muciniphila	0.000120271	0.000747321	2.63544	-11.7037
PANTO-PWY: phosphopantothenate biosynthesis I|g__Bacteroides.s__Bacteroides_faecis	0.00050108	0.0031021	2.63013	-9.6476
SO4ASSIM-PWY: sulfate reduction I (assimilatory)|g__Odoribacter.s__Odoribacter_splanchnicus	0.000306505	0.00188715	2.62222	-10.3607
PWY-6122: 5-aminoimidazole ribonucleotide biosynthesis II|g__Odoribacter.s__Odoribacter_splanchnicus	0.000304913	0.00187175	2.61792	-10.3704
PWY-6277: superpathway of 5-aminoimidazole ribonucleotide biosynthesis|g__Odoribacter.s__Odoribacter_splanchnicus	0.000304913	0.00187175	2.61792	-10.3704
PWY-5686: UMP biosynthesis|g__Alistipes.s__Alistipes_putredinis	0.000782115	0.00479427	2.61586	-9.0124
PWY-1269: CMP-3-deoxy-D-manno-octulosonate biosynthesis I|g__Alistipes.s__Alistipes_shahii	0.00132007	0.00809049	2.61561	-8.25736
PWY-6703: preQ0 biosynthesis|g__Coprobacter.s__Coprobacter_fastidiosus	4.42087e-05	0.000270525	2.61336	-13.1586
VALSYN-PWY: L-valine biosynthesis|g__Streptococcus.s__Streptococcus_australis	4.60805e-05	0.000281834	2.61262	-13.0992
NONOXIPENT-PWY: pentose phosphate pathway (non-oxidative branch)|g__Alistipes.s__Alistipes_shahii	0.00100047	0.00611886	2.61258	-8.65881
PWY-7221: guanosine ribonucleotides de novo biosynthesis|g__Bacteroides.s__Bacteroides_faecis	0.000609246	0.00371927	2.60992	-9.37573
PWY-7111: pyruvate fermentation to isobutanol (engineered)|g__Coprobacter.s__Coprobacter_fastidiosus	5.71689e-05	0.000346208	2.59834	-12.7952
VALSYN-PWY: L-valine biosynthesis|g__Coprobacter.s__Coprobacter_fastidiosus	5.71689e-05	0.000346208	2.59834	-12.7952
COA-PWY-1: coenzyme A biosynthesis II (mammalian)|g__Streptococcus.s__Streptococcus_parasanguinis	8.8598e-05	0.000534643	2.59323	-12.1658
PEPTIDOGLYCANSYN-PWY: peptidoglycan biosynthesis I (meso-diaminopimelate containing)|g__Bacteroides.s__Bacteroides_finegoldii	0.000243936	0.00147062	2.59185	-10.7053
PANTO-PWY: phosphopantothenate biosynthesis I|g__Bacteroides.s__Bacteroides_finegoldii	0.000239417	0.00144264	2.59111	-10.7326
PWY-6163: chorismate biosynthesis from 3-dehydroquinate|g__Methanobrevibacter.s__Methanobrevibacter_smithii	6.67392e-05	0.000401425	2.58852	-12.5768
PWY-6700: queuosine biosynthesis|g__Bacteroides.s__Bacteroides_finegoldii	0.000237303	0.00142541	2.58657	-10.7477
AEROBACTINSYN-PWY: aerobactin biosynthesis|g__Escherichia.s__Escherichia_coli	2.70861e-05	0.000162671	2.58633	-13.8789
COA-PWY: coenzyme A biosynthesis I|g__Streptococcus.s__Streptococcus_parasanguinis	9.80871e-05	0.000586902	2.58099	-12.0251
ANAGLYCOLYSIS-PWY: glycolysis III (from glucose)|g__Alistipes.s__Alistipes_shahii	0.00140669	0.00841148	2.58006	-8.18345
PWY-6609: adenine and adenosine salvage III|g__Alistipes.s__Alistipes_shahii	0.00151044	0.00902969	2.57971	-8.08096
PWY-6386: UDP-N-acetylmuramoyl-pentapeptide biosynthesis II (lysine-containing)|g__Odoribacter.s__Odoribacter_splanchnicus	0.000319874	0.00190912	2.57733	-10.3215
ARGININE-SYN4-PWY: L-ornithine de novo biosynthesis|g__Bacteroides.s__Bacteroides_caccae	0.000419452	0.00249843	2.57445	-9.93198
PWY-5686: UMP biosynthesis|g__Bacteroides.s__Bacteroides_caccae	0.000366008	0.00217622	2.57188	-10.1299
PWY-6305: putrescine biosynthesis IV|g__Odoribacter.s__Odoribacter_splanchnicus	0.000354394	0.00210675	2.57159	-10.1766
PWY-6122: 5-aminoimidazole ribonucleotide biosynthesis II|g__Methanobrevibacter.s__Methanobrevibacter_smithii	8.82325e-05	0.00052356	2.56897	-12.1838
PWY-6277: superpathway of 5-aminoimidazole ribonucleotide biosynthesis|g__Methanobrevibacter.s__Methanobrevibacter_smithii	8.82325e-05	0.00052356	2.56897	-12.1838
PWY-1269: CMP-3-deoxy-D-manno-octulosonate biosynthesis I|g__Bacteroides.s__Bacteroides_caccae	0.000394176	0.00233595	2.5671	-10.0253
COA-PWY-1: coenzyme A biosynthesis II (mammalian)|g__Alistipes.s__Alistipes_putredinis	0.000836547	0.00494957	2.56478	-8.94087
BRANCHED-CHAIN-AA-SYN-PWY: superpathway of branched amino acid biosynthesis|g__Streptococcus.s__Streptococcus_parasanguinis	7.04408e-05	0.000416031	2.56221	-12.5121
PWY-7219: adenosine ribonucleotides de novo biosynthesis|g__Akkermansia.s__Akkermansia_muciniphila	0.000189758	0.00111727	2.55775	-11.0847
PWY-6385: peptidoglycan biosynthesis III (mycobacteria)|g__Odoribacter.s__Odoribacter_splanchnicus	0.000327272	0.0019235	2.55517	-10.2996
DTDPRHAMSYN-PWY: dTDP-L-rhamnose biosynthesis I|g__Alistipes.s__Alistipes_shahii	0.00169221	0.00988568	2.54643	-7.93366
PWY-6121: 5-aminoimidazole ribonucleotide biosynthesis I|g__Alistipes.s__Alistipes_putredinis	0.000793952	0.0046282	2.54333	-9.027
PWY-6386: UDP-N-acetylmuramoyl-pentapeptide biosynthesis II (lysine-containing)|g__Bacteroides.s__Bacteroides_finegoldii	0.000259386	0.00151081	2.54215	-10.6415
PWY0-1297: superpathway of purine deoxyribonucleosides degradation|g__Streptococcus.s__Streptococcus_parasanguinis	8.27013e-05	0.000481201	2.54066	-12.2914
PWY-2941: L-lysine biosynthesis II|g__Odoribacter.s__Odoribacter_splanchnicus	0.000332921	0.00193353	2.53799	-10.2835
1CMET2-PWY: N10-formyl-tetrahydrofolate biosynthesis|g__Bacteroides.s__Bacteroides_caccae	0.000364527	0.00211343	2.53549	-10.1539
PWY-7663: gondoate biosynthesis (anaerobic)|g__Bacteroides.s__Bacteroides_faecis	0.000485953	0.00280939	2.53137	-9.74121
PWY-6387: UDP-N-acetylmuramoyl-pentapeptide biosynthesis I (meso-diaminopimelate containing)|g__Bacteroides.s__Bacteroides_finegoldii	0.000248271	0.00143332	2.52937	-10.7111
1CMET2-PWY: N10-formyl-tetrahydrofolate biosynthesis|g__Akkermansia.s__Akkermansia_muciniphila	0.000134751	0.000777752	2.52901	-11.5929
PWY-1042: glycolysis IV (plant cytosol)|g__Bacteroides.s__Bacteroides_finegoldii	0.000276465	0.00159132	2.52505	-10.5581
PWY-7221: guanosine ribonucleotides de novo biosynthesis|g__Bacteroides.s__Bacteroides_finegoldii	0.000240364	0.00138218	2.52365	-10.7607
1CMET2-PWY: N10-formyl-tetrahydrofolate biosynthesis|g__Bacteroides.s__Bacteroides_faecis	0.00043359	0.00249112	2.52239	-9.91018
TCA: TCA cycle I (prokaryotic)|unclassified	0.00120857	0.00693008	2.51957	-8.4327
PWY-6387: UDP-N-acetylmuramoyl-pentapeptide biosynthesis I (meso-diaminopimelate containing)|g__Bacteroides.s__Bacteroides_ovatus	0.000539648	0.00309258	2.51872	-9.59633
PEPTIDOGLYCANSYN-PWY: peptidoglycan biosynthesis I (meso-diaminopimelate containing)|g__Odoribacter.s__Odoribacter_splanchnicus	0.000312435	0.00178522	2.51447	-10.3869
P161-PWY: acetylene degradation|unclassified	0.00054569	0.00310652	2.50915	-9.58506
PWY-1042: glycolysis IV (plant cytosol)|g__Bacteroides.s__Bacteroides_faecis	0.000605973	0.0034434	2.50651	-9.43521
PWY-6387: UDP-N-acetylmuramoyl-pentapeptide biosynthesis I (meso-diaminopimelate containing)|g__Streptococcus.s__Streptococcus_parasanguinis	6.69079e-05	0.000379511	2.50389	-12.6155
PEPTIDOGLYCANSYN-PWY: peptidoglycan biosynthesis I (meso-diaminopimelate containing)|g__Bacteroides.s__Bacteroides_ovatus	0.000565753	0.00320058	2.50009	-9.53749
GOLPDLCAT-PWY: superpathway of glycerol degradation to 1.3-propanediol|g__Streptococcus.s__Streptococcus_sanguinis	1.6698e-05	9.4415e-05	2.49934	-14.6203
PWY-1042: glycolysis IV (plant cytosol)|g__Akkermansia.s__Akkermansia_muciniphila	0.000235381	0.00132758	2.49573	-10.8048
PWY-5686: UMP biosynthesis|g__Odoribacter.s__Odoribacter_splanchnicus	0.000294852	0.00166098	2.49397	-10.4807
PWY-6121: 5-aminoimidazole ribonucleotide biosynthesis I|g__Streptococcus.s__Streptococcus_parasanguinis	0.000130947	0.000736988	2.49265	-11.6524
TRPSYN-PWY: L-tryptophan biosynthesis|g__Odoribacter.s__Odoribacter_splanchnicus	0.00030269	0.00170237	2.49163	-10.4441
PWY-6386: UDP-N-acetylmuramoyl-pentapeptide biosynthesis II (lysine-containing)|g__Bacteroides.s__Bacteroides_ovatus	0.000570963	0.00320916	2.49073	-9.52895
PWY0-845: superpathway of pyridoxal 5'-phosphate biosynthesis and salvage|g__Bacteroides.s__Bacteroides_caccae	0.000450146	0.00252059	2.48529	-9.87467
PWY-7111: pyruvate fermentation to isobutanol (engineered)|g__Streptococcus.s__Streptococcus_parasanguinis	8.55217e-05	0.000478461	2.48404	-12.2713
PWY-6386: UDP-N-acetylmuramoyl-pentapeptide biosynthesis II (lysine-containing)|g__Streptococcus.s__Streptococcus_parasanguinis	7.40705e-05	0.000413758	2.48182	-12.4798
PWY-3841: folate transformations II|g__Bacteroides.s__Bacteroides_faecis	0.000478345	0.00266648	2.47881	-9.79026
PWY-5686: UMP biosynthesis|g__Bacteroides.s__Bacteroides_faecis	0.000492814	0.00274277	2.47652	-9.74841
PWY-6387: UDP-N-acetylmuramoyl-pentapeptide biosynthesis I (meso-diaminopimelate containing)|g__Odoribacter.s__Odoribacter_splanchnicus	0.000309004	0.00171845	2.47541	-10.4224
PWY-5695: urate biosynthesis/inosine 5'-phosphate degradation|g__Alistipes.s__Alistipes_shahii	0.00157193	0.00873898	2.47493	-8.07578
PWY-7219: adenosine ribonucleotides de novo biosynthesis|g__Coprobacter.s__Coprobacter_fastidiosus	7.21966e-05	0.000400353	2.47127	-12.5221
UNINTEGRATED|g__Akkermansia.s__Akkermansia_muciniphila	0.0791899	0.438332	2.46864	-2.42422
PWY-1042: glycolysis IV (plant cytosol)|g__Bacteroides.s__Bacteroides_caccae	0.000550661	0.00304682	2.46807	-9.59251
PWY-6385: peptidoglycan biosynthesis III (mycobacteria)|g__Bacteroides.s__Bacteroides_ovatus	0.000568745	0.00313586	2.46301	-9.54843
PWY-6121: 5-aminoimidazole ribonucleotide biosynthesis I|g__Odoribacter.s__Odoribacter_splanchnicus	0.000314297	0.00172401	2.45557	-10.4078
PANTOSYN-PWY: pantothenate and coenzyme A biosynthesis I|g__Odoribacter.s__Odoribacter_splanchnicus	0.000334306	0.00183221	2.45434	-10.3194
PWY-2942: L-lysine biosynthesis III|g__Bacteroides.s__Bacteroides_finegoldii	0.000236061	0.00129301	2.45351	-10.8218
PWY-4981: L-proline biosynthesis II (from arginine)|g__Adlercreutzia.s__Adlercreutzia_equolifaciens	6.86567e-05	0.000375911	2.45292	-12.6038
DTDPRHAMSYN-PWY: dTDP-L-rhamnose biosynthesis I|g__Bacteroides.s__Bacteroides_caccae	0.000458162	0.0025042	2.45042	-9.86664
PANTO-PWY: phosphopantothenate biosynthesis I|g__Bacteroides.s__Bacteroides_caccae	0.000421199	0.00230021	2.44919	-9.98862
PWY-5097: L-lysine biosynthesis VI|g__Methanobrevibacter.s__Methanobrevibacter_smithii	9.39257e-05	0.000512816	2.44885	-12.1537
PWY-1042: glycolysis IV (plant cytosol)|g__Alistipes.s__Alistipes_shahii	0.00173633	0.00945256	2.44466	-7.94741
PWY-5097: L-lysine biosynthesis VI|g__Bacteroides.s__Bacteroides_caccae	0.000403558	0.00218837	2.43901	-10.0554
COA-PWY: coenzyme A biosynthesis I|g__Odoribacter.s__Odoribacter_splanchnicus	0.000339067	0.00183789	2.43841	-10.3069
PWY-6703: preQ0 biosynthesis|g__Bacteroides.s__Bacteroides_faecis	0.000516782	0.00277421	2.42445	-9.70593
PWY-4981: L-proline biosynthesis II (from arginine)|g__Odoribacter.s__Odoribacter_splanchnicus	0.000318834	0.0017101	2.42321	-10.4033
PWY-2942: L-lysine biosynthesis III|g__Methanobrevibacter.s__Methanobrevibacter_smithii	9.36447e-05	0.000501834	2.42194	-12.1715
PWY-6151: S-adenosyl-L-methionine cycle I|g__Streptococcus.s__Streptococcus_parasanguinis	0.000116966	0.000626173	2.42048	-11.8514
PWY-6737: starch degradation V|g__Akkermansia.s__Akkermansia_muciniphila	0.000127261	0.0006805	2.41881	-11.7305
PWY-5667: CDP-diacylglycerol biosynthesis I|g__Bacteroides.s__Bacteroides_faecis	0.000460867	0.00245888	2.41558	-9.87557
PWY0-1319: CDP-diacylglycerol biosynthesis II|g__Bacteroides.s__Bacteroides_faecis	0.000460867	0.00245888	2.41558	-9.87557
COA-PWY-1: coenzyme A biosynthesis II (mammalian)|g__Collinsella.s__Collinsella_aerofaciens	0.000128999	0.000686446	2.41178	-11.7145
PYRIDOXSYN-PWY: pyridoxal 5'-phosphate biosynthesis I|g__Bacteroides.s__Bacteroides_caccae	0.000441014	0.0023447	2.41051	-9.94163
ILEUSYN-PWY: L-isoleucine biosynthesis I (from threonine)|g__Odoribacter.s__Odoribacter_splanchnicus	0.000343023	0.00180606	2.39647	-10.3112
VALSYN-PWY: L-valine biosynthesis|g__Odoribacter.s__Odoribacter_splanchnicus	0.000343023	0.00180606	2.39647	-10.3112
RHAMCAT-PWY: L-rhamnose degradation I|g__Bacteroides.s__Bacteroides_finegoldii	0.000417195	0.00219495	2.39539	-10.0293
PWY-5659: GDP-mannose biosynthesis|g__Odoribacter.s__Odoribacter_splanchnicus	0.00036729	0.0019278	2.39196	-10.2148
PYRIDNUCSYN-PWY: NAD biosynthesis I (from aspartate)|g__Alistipes.s__Alistipes_shahii	0.0014855	0.00772448	2.37848	-8.20559
PWY0-845: superpathway of pyridoxal 5'-phosphate biosynthesis and salvage|g__Bacteroides.s__Bacteroides_faecis	0.000524781	0.0027223	2.37504	-9.70848
ARGININE-SYN4-PWY: L-ornithine de novo biosynthesis|g__Bacteroides.s__Bacteroides_faecis	0.000565962	0.00291788	2.36614	-9.60393
PWY-5667: CDP-diacylglycerol biosynthesis I|g__Bacteroides.s__Bacteroides_caccae	0.000439311	0.00226482	2.36608	-9.96943
PWY0-1319: CDP-diacylglycerol biosynthesis II|g__Bacteroides.s__Bacteroides_caccae	0.000439311	0.00226482	2.36608	-9.96943
PWY-5097: L-lysine biosynthesis VI|g__Bacteroides.s__Bacteroides_faecis	0.000547743	0.00282071	2.36449	-9.65197
PWY-2942: L-lysine biosynthesis III|g__Bacteroides.s__Bacteroides_faecis	0.000574203	0.00294933	2.36075	-9.58578
HISDEG-PWY: L-histidine degradation I|g__Streptococcus.s__Streptococcus_parasanguinis	5.44732e-05	0.000279675	2.36013	-12.984
ASPASN-PWY: superpathway of L-aspartate and L-asparagine biosynthesis|g__Bacteroides.s__Bacteroides_finegoldii	0.000260612	0.00133797	2.36007	-10.7258
UNINTEGRATED|g__Lactococcus.s__Lactococcus_lactis	0.0429814	0.220023	2.35587	-3.36221
HISDEG-PWY: L-histidine degradation I|g__Alistipes.s__Alistipes_shahii	0.00101584	0.00517218	2.34809	-8.76906
PWY-3001: superpathway of L-isoleucine biosynthesis I|g__Methanobrevibacter.s__Methanobrevibacter_smithii	7.16717e-05	0.000364439	2.3462	-12.5951
PWY-7221: guanosine ribonucleotides de novo biosynthesis|g__Coprobacter.s__Coprobacter_fastidiosus	8.46976e-05	0.00042419	2.32432	-12.3652
PWY-6609: adenine and adenosine salvage III|g__Streptococcus.s__Streptococcus_salivarius	0.000227957	0.00114095	2.3234	-10.9373
PWY-2942: L-lysine biosynthesis III|g__Bacteroides.s__Bacteroides_caccae	0.000407439	0.00203516	2.32049	-10.1009
COA-PWY-1: coenzyme A biosynthesis II (mammalian)|g__Bacteroides.s__Bacteroides_faecis	0.000543739	0.00269633	2.31001	-9.68979
PWY-6703: preQ0 biosynthesis|g__Streptococcus.s__Streptococcus_salivarius	0.000126437	0.000623716	2.30247	-11.7981
PWY-7219: adenosine ribonucleotides de novo biosynthesis|g__Bifidobacterium.s__Bifidobacterium_longum	8.38473e-05	0.000413504	2.30206	-12.3908
PWY0-1296: purine ribonucleosides degradation|g__Streptococcus.s__Streptococcus_australis	3.67298e-05	0.00018108	2.3016	-13.5819
PYRIDOXSYN-PWY: pyridoxal 5'-phosphate biosynthesis I|g__Bacteroides.s__Bacteroides_faecis	0.000510122	0.002513	2.3005	-9.78662
PWY-7219: adenosine ribonucleotides de novo biosynthesis|g__Bacteroides.s__Bacteroides_caccae	0.000620726	0.00305613	2.29968	-9.50392
PWY-6122: 5-aminoimidazole ribonucleotide biosynthesis II|g__Alistipes.s__Alistipes_putredinis	0.000922598	0.00453292	2.29667	-8.93368
PWY-6277: superpathway of 5-aminoimidazole ribonucleotide biosynthesis|g__Alistipes.s__Alistipes_putredinis	0.000922598	0.00453292	2.29667	-8.93368
PWY-6123: inosine-5'-phosphate biosynthesis I|g__Bacteroides.s__Bacteroides_finegoldii	0.00028534	0.00138931	2.28361	-10.6332
PWY0-1533: methylphosphonate degradation I|g__Escherichia.s__Escherichia_coli	8.70105e-05	0.00042348	2.28303	-12.3469
PWY-5695: urate biosynthesis/inosine 5'-phosphate degradation|g__Bacteroides.s__Bacteroides_faecis	0.000584778	0.00283475	2.27726	-9.60119
ARGININE-SYN4-PWY: L-ornithine de novo biosynthesis|g__Bacteroides.s__Bacteroides_sp_2_1_22	2.29868e-05	0.000110902	2.27041	-14.2736
PWY-5695: urate biosynthesis/inosine 5'-phosphate degradation|g__Bacteroides.s__Bacteroides_sp_2_1_22	3.46362e-05	0.000166973	2.26926	-13.6827
PWY-6168: flavin biosynthesis III (fungi)|g__Bacteroides.s__Bacteroides_faecis	0.000541978	0.00260863	2.26699	-9.71599
PWY-7221: guanosine ribonucleotides de novo biosynthesis|g__Bacteroides.s__Bacteroides_caccae	0.000562333	0.00270511	2.26619	-9.66319
PWY-5695: urate biosynthesis/inosine 5'-phosphate degradation|g__Bacteroides.s__Bacteroides_caccae	0.000556188	0.00267339	2.26503	-9.67962
PANTO-PWY: phosphopantothenate biosynthesis I|g__Akkermansia.s__Akkermansia_muciniphila	0.000161654	0.000774712	2.26075	-11.4644
ILEUSYN-PWY: L-isoleucine biosynthesis I (from threonine)|g__Streptococcus.s__Streptococcus_parasanguinis	9.86509e-05	0.000472155	2.25886	-12.1779
VALSYN-PWY: L-valine biosynthesis|g__Streptococcus.s__Streptococcus_parasanguinis	9.86509e-05	0.000472155	2.25886	-12.1779
BRANCHED-CHAIN-AA-SYN-PWY: superpathway of branched amino acid biosynthesis|g__Odoribacter.s__Odoribacter_splanchnicus	0.000324132	0.00155029	2.25788	-10.4622
1CMET2-PWY: N10-formyl-tetrahydrofolate biosynthesis|g__Bacteroides.s__Bacteroides_finegoldii	0.000288123	0.00136413	2.24323	-10.6394
NONMEVIPP-PWY: methylerythritol phosphate pathway I|g__Coprobacter.s__Coprobacter_fastidiosus	6.39575e-05	0.00030212	2.23994	-12.8126
PWY-6703: preQ0 biosynthesis|g__Bacteroides.s__Bacteroides_nordii	4.6825e-05	0.00022096	2.23843	-13.2631
PWY-5097: L-lysine biosynthesis VI|g__Bacteroides.s__Bacteroides_finegoldii	0.000263277	0.00123683	2.23199	-10.7751
PWY-7219: adenosine ribonucleotides de novo biosynthesis|g__Odoribacter.s__Odoribacter_splanchnicus	0.00042943	0.00201457	2.22998	-10.0703
NONMEVIPP-PWY: methylerythritol phosphate pathway I|g__Alistipes.s__Alistipes_putredinis	0.000882798	0.00413303	2.22704	-9.03211
RHAMCAT-PWY: L-rhamnose degradation I|g__Bacteroides.s__Bacteroides_sp_2_1_22	2.97611e-05	0.000139134	2.22497	-13.9237
PWY-6700: queuosine biosynthesis|g__Bacteroides.s__Bacteroides_uniformis	0.00396093	0.0183204	2.20954	-6.87518
PWY-6737: starch degradation V|g__Roseburia.s__Roseburia_inulinivorans	0.00127066	0.00586612	2.20683	-8.51679
PWY-6703: preQ0 biosynthesis|g__Bacteroides.s__Bacteroides_caccae	0.00051861	0.0023801	2.1983	-9.81391
PWY0-1586: peptidoglycan maturation (meso-diaminopimelate containing)|g__Akkermansia.s__Akkermansia_muciniphila	0.00020556	0.000943088	2.19783	-11.1492
PWY-6609: adenine and adenosine salvage III|g__Escherichia.s__Escherichia_coli	7.14038e-05	0.000327574	2.19775	-12.6748
GALACTUROCAT-PWY: D-galacturonate degradation I|g__Alistipes.s__Alistipes_shahii	0.00113844	0.00521297	2.19504	-8.6812
PWY-3841: folate transformations II|g__Bacteroides.s__Bacteroides_finegoldii	0.000275314	0.00125403	2.18743	-10.7329
PWY-7663: gondoate biosynthesis (anaerobic)|g__Bacteroides.s__Bacteroides_caccae	0.000564341	0.00255271	2.17739	-9.70245
PWY4LZ-257: superpathway of fermentation (Chlamydomonas reinhardtii)|unclassified	0.000645452	0.00291639	2.1758	-9.5095
UNINTEGRATED|g__Coprobacter.s__Coprobacter_fastidiosus	0.0669989	0.301908	2.1719	-2.81377
NONMEVIPP-PWY: methylerythritol phosphate pathway I|g__Odoribacter.s__Odoribacter_splanchnicus	0.000310056	0.00139505	2.16972	-10.5703
RHAMCAT-PWY: L-rhamnose degradation I|g__Escherichia.s__Escherichia_coli	9.46864e-05	0.000425653	2.16845	-12.2823
PANTO-PWY: phosphopantothenate biosynthesis I|g__Bacteroides.s__Bacteroides_uniformis	0.00483272	0.0216225	2.16163	-6.61214
PWY-5103: L-isoleucine biosynthesis III|g__Odoribacter.s__Odoribacter_splanchnicus	0.000324132	0.00144887	2.16027	-10.511
PWY-5188: tetrapyrrole biosynthesis I (from glutamate)|unclassified	0.00482472	0.0214652	2.15348	-6.6186
PANTO-PWY: phosphopantothenate biosynthesis I|g__Alistipes.s__Alistipes_putredinis	0.00105051	0.00465829	2.14872	-8.82034
HISTSYN-PWY: L-histidine biosynthesis|g__Bacteroides.s__Bacteroides_faecis	0.000596621	0.0026355	2.14319	-9.6393
PWY-7221: guanosine ribonucleotides de novo biosynthesis|g__Methanobrevibacter.s__Methanobrevibacter_smithii	0.000166926	0.000737123	2.1427	-11.4772
DTDPRHAMSYN-PWY: dTDP-L-rhamnose biosynthesis I|g__Bacteroides.s__Bacteroides_finegoldii	0.00027834	0.00122272	2.13517	-10.7433
RHAMCAT-PWY: L-rhamnose degradation I|g__Bacteroides.s__Bacteroides_faecis	0.000691242	0.00302627	2.13028	-9.43338
RHAMCAT-PWY: L-rhamnose degradation I|unclassified	0.00180616	0.00789888	2.12872	-8.0485
PWY-6609: adenine and adenosine salvage III|g__Bacteroides.s__Bacteroides_faecis	0.000625382	0.00273215	2.12723	-9.57936
PWY-7111: pyruvate fermentation to isobutanol (engineered)|g__Bacteroides.s__Bacteroides_finegoldii	0.000214037	0.00093503	2.12716	-11.1263
VALSYN-PWY: L-valine biosynthesis|g__Bacteroides.s__Bacteroides_finegoldii	0.000214037	0.00093503	2.12716	-11.1263
PWY-7221: guanosine ribonucleotides de novo biosynthesis|g__Alistipes.s__Alistipes_putredinis	0.00105458	0.00460579	2.12678	-8.82573
PWY-6124: inosine-5'-phosphate biosynthesis II|g__Bacteroides.s__Bacteroides_finegoldii	0.000303513	0.00131455	2.11474	-10.6286
PWY-6737: starch degradation V|g__Streptococcus.s__Streptococcus_parasanguinis	0.000220852	0.0009553	2.11288	-11.0882
NONMEVIPP-PWY: methylerythritol phosphate pathway I|g__Akkermansia.s__Akkermansia_muciniphila	0.000143247	0.000618809	2.11099	-11.7137
PWY-1269: CMP-3-deoxy-D-manno-octulosonate biosynthesis I|g__Odoribacter.s__Odoribacter_splanchnicus	0.000345131	0.00148546	2.1057	-10.4477
PWY-7219: adenosine ribonucleotides de novo biosynthesis|g__Alistipes.s__Alistipes_putredinis	0.00102661	0.00441783	2.10545	-8.87517
PWY-3841: folate transformations II|g__Bacteroides.s__Bacteroides_uniformis	0.00441817	0.0188216	2.09087	-6.7769
PWY-6703: preQ0 biosynthesis|g__Odoribacter.s__Odoribacter_splanchnicus	0.000374276	0.00158232	2.07987	-10.3437
PWY-7197: pyrimidine deoxyribonucleotide phosphorylation|g__Methanobrevibacter.s__Methanobrevibacter_smithii	7.82402e-05	0.000330101	2.07693	-12.6033
PWY-3841: folate transformations II|g__Bacteroides.s__Bacteroides_caccae	0.000526745	0.00221273	2.07065	-9.85528
HOMOSER-METSYN-PWY: L-methionine biosynthesis I|unclassified	0.00200345	0.00837458	2.06353	-7.93153
PEPTIDOGLYCANSYN-PWY: peptidoglycan biosynthesis I (meso-diaminopimelate containing)|g__Alistipes.s__Alistipes_putredinis	0.000986229	0.00411614	2.0613	-8.95514
ARGININE-SYN4-PWY: L-ornithine de novo biosynthesis|g__Bacteroides.s__Bacteroides_uniformis	0.00501484	0.0209094	2.05987	-6.60964
1CMET2-PWY: N10-formyl-tetrahydrofolate biosynthesis|g__Bacteroides.s__Bacteroides_uniformis	0.00433424	0.0180677	2.05956	-6.82022
PWY-6124: inosine-5'-phosphate biosynthesis II|g__Bacteroides.s__Bacteroides_nordii	5.45674e-05	0.000227167	2.05764	-13.1328
PWY-5189: tetrapyrrole biosynthesis II (from glycine)|g__Methanobrevibacter.s__Methanobrevibacter_smithii	6.80387e-05	0.000282963	2.05618	-12.8152
PWY-6163: chorismate biosynthesis from 3-dehydroquinate|g__Alistipes.s__Alistipes_shahii	0.00118155	0.00491111	2.05537	-8.69742
PWY-6969: TCA cycle V (2-oxoglutarate:ferredoxin oxidoreductase)|unclassified	0.00128746	0.00534885	2.0547	-8.57391
PANTOSYN-PWY: pantothenate and coenzyme A biosynthesis I|g__Blautia.s__Ruminococcus_torques	5.75902e-05	0.000238015	2.04716	-13.0602
PWY-5097: L-lysine biosynthesis VI|g__Bacteroides.s__Bacteroides_uniformis	0.00567889	0.0232435	2.03315	-6.4436
PWY-7111: pyruvate fermentation to isobutanol (engineered)|g__Odoribacter.s__Odoribacter_splanchnicus	0.000343023	0.00140357	2.03272	-10.493
PWY-7234: inosine-5'-phosphate biosynthesis III|g__Escherichia.s__Escherichia_coli	3.9134e-05	0.000158778	2.02052	-13.631
PWY-5384: sucrose degradation IV (sucrose phosphorylase)|g__Escherichia.s__Escherichia_coli	4.09561e-05	0.000166118	2.02006	-13.5655
UNINTEGRATED|g__Odoribacter.s__Odoribacter_splanchnicus	0.313239	1.25704	2.00469	-0.672317
PWY-5667: CDP-diacylglycerol biosynthesis I|g__Bacteroides.s__Bacteroides_finegoldii	0.000291092	0.00116489	2.00064	-10.7459
PWY0-1319: CDP-diacylglycerol biosynthesis II|g__Bacteroides.s__Bacteroides_finegoldii	0.000291092	0.00116489	2.00064	-10.7459
PWY-6387: UDP-N-acetylmuramoyl-pentapeptide biosynthesis I (meso-diaminopimelate containing)|g__Alistipes.s__Alistipes_putredinis	0.000990389	0.00392363	1.98612	-8.98666
SULFATE-CYS-PWY: superpathway of sulfate assimilation and cysteine biosynthesis|g__Escherichia.s__Escherichia_coli	9.13597e-05	0.000361693	1.98513	-12.4255
PWY-6123: inosine-5'-phosphate biosynthesis I|g__Bacteroides.s__Bacteroides_nordii	5.00825e-05	0.000198217	1.9847	-13.293
PWY-6122: 5-aminoimidazole ribonucleotide biosynthesis II|g__Veillonella.s__Veillonella_atypica	1.47157e-05	5.79233e-05	1.97679	-15.0639
PWY-6277: superpathway of 5-aminoimidazole ribonucleotide biosynthesis|g__Veillonella.s__Veillonella_atypica	1.47157e-05	5.79233e-05	1.97679	-15.0639
COA-PWY-1: coenzyme A biosynthesis II (mammalian)|g__Bacteroides.s__Bacteroides_uniformis	0.00520585	0.0204069	1.97085	-6.60022
PWY-7254: TCA cycle VII (acetate-producers)|g__Escherichia.s__Escherichia_coli	4.27504e-05	0.000167507	1.97021	-13.5286
PWY0-1297: superpathway of purine deoxyribonucleosides degradation|g__Escherichia.s__Escherichia_coli	7.94448e-05	0.000311041	1.96908	-12.6351
UNINTEGRATED|g__Streptococcus.s__Streptococcus_parasanguinis	0.0722099	0.281863	1.96473	-2.8093
PWY-6151: S-adenosyl-L-methionine cycle I|g__Bacteroides.s__Bacteroides_uniformis	0.0049657	0.0193181	1.95989	-6.67384
PWY-6387: UDP-N-acetylmuramoyl-pentapeptide biosynthesis I (meso-diaminopimelate containing)|g__Bacteroides.s__Bacteroides_uniformis	0.00432895	0.0167662	1.95346	-6.87504
PWY-6386: UDP-N-acetylmuramoyl-pentapeptide biosynthesis II (lysine-containing)|g__Alistipes.s__Alistipes_putredinis	0.00100547	0.00389171	1.95254	-8.98165
COMPLETE-ARO-PWY: superpathway of aromatic amino acid biosynthesis|g__Akkermansia.s__Akkermansia_muciniphila	0.000204225	0.000788945	1.94977	-11.2827
PWY-6700: queuosine biosynthesis|g__Escherichia.s__Escherichia_coli	4.38988e-05	0.000169411	1.94827	-13.5013
PWY-6386: UDP-N-acetylmuramoyl-pentapeptide biosynthesis II (lysine-containing)|g__Bacteroides.s__Bacteroides_uniformis	0.00449506	0.0172938	1.94384	-6.82552
PWY-5097: L-lysine biosynthesis VI|g__Bacteroides.s__Bacteroides_nordii	5.10937e-05	0.000196447	1.94292	-13.285
PWY-5686: UMP biosynthesis|g__Bacteroides.s__Bacteroides_uniformis	0.00463246	0.0177748	1.93999	-6.78401
PWY-1269: CMP-3-deoxy-D-manno-octulosonate biosynthesis I|g__Bacteroides.s__Bacteroides_faecis	0.000558582	0.00213808	1.93647	-9.83771
PWY66-400: glycolysis VI (metazoan)|g__Bacteroides.s__Bacteroides_ovatus	0.00117832	0.00448008	1.92679	-8.76566
ARGININE-SYN4-PWY: L-ornithine de novo biosynthesis|g__Bacteroides.s__Bacteroides_finegoldii	0.000300203	0.00112631	1.90759	-10.748
PEPTIDOGLYCANSYN-PWY: peptidoglycan biosynthesis I (meso-diaminopimelate containing)|g__Bacteroides.s__Bacteroides_uniformis	0.00454953	0.017042	1.9053	-6.82741
PWY-7219: adenosine ribonucleotides de novo biosynthesis|g__Bacteroides.s__Bacteroides_sp_2_1_22	0.00011901	0.000445755	1.90516	-12.084
VALSYN-PWY: L-valine biosynthesis|g__Streptococcus.s__Streptococcus_infantis	1.99874e-05	7.47661e-05	1.90329	-14.6589
PWY-5667: CDP-diacylglycerol biosynthesis I|g__Bacteroides.s__Bacteroides_uniformis	0.00552863	0.0205352	1.8931	-6.55231
PWY0-1319: CDP-diacylglycerol biosynthesis II|g__Bacteroides.s__Bacteroides_uniformis	0.00552863	0.0205352	1.8931	-6.55231
PWY-6609: adenine and adenosine salvage III|g__Streptococcus.s__Streptococcus_parasanguinis	0.000187821	0.00069616	1.89006	-11.4333
METSYN-PWY: L-homoserine and L-methionine biosynthesis|unclassified	0.00375649	0.0138707	1.88458	-7.11411
PWY-5676: acetyl-CoA fermentation to butanoate II|unclassified	0.00190519	0.00703063	1.88372	-8.09399
PWY-2942: L-lysine biosynthesis III|g__Bacteroides.s__Bacteroides_nordii	4.5421e-05	0.000167328	1.88125	-13.4857
PWY-7219: adenosine ribonucleotides de novo biosynthesis|g__Bacteroides.s__Bacteroides_uniformis	0.00781945	0.0287537	1.87861	-6.05941
PWY-2942: L-lysine biosynthesis III|g__Bacteroides.s__Bacteroides_uniformis	0.00671103	0.0245855	1.8732	-6.28265
HSERMETANA-PWY: L-methionine biosynthesis III|unclassified	0.00193209	0.00707796	1.87317	-8.07904
UNINTEGRATED|g__Alistipes.s__Alistipes_shahii	0.530596	1.94034	1.87063	0.0209995
PWY-5659: GDP-mannose biosynthesis|g__Bacteroides.s__Bacteroides_finegoldii	0.000229841	0.000839421	1.86876	-11.1527
PWY-7456: mannan degradation|unclassified	0.00156596	0.00568111	1.85913	-8.38917
TRPSYN-PWY: L-tryptophan biosynthesis|g__Escherichia.s__Escherichia_coli	2.42765e-05	8.7982e-05	1.85765	-14.4013
THRESYN-PWY: superpathway of L-threonine biosynthesis|g__Blautia.s__Ruminococcus_torques	9.35017e-05	0.000338281	1.85516	-12.4571
PWY-7663: gondoate biosynthesis (anaerobic)|g__Bacteroides.s__Bacteroides_nordii	3.98197e-05	0.000143769	1.8522	-13.6901
PWY-7663: gondoate biosynthesis (anaerobic)|g__Bacteroides.s__Bacteroides_finegoldii	0.000247188	0.000890751	1.84941	-11.0574
PWY-5695: urate biosynthesis/inosine 5'-phosphate degradation|g__Bacteroides.s__Bacteroides_finegoldii	0.000257777	0.000924661	1.8428	-11.0002
PWY-5667: CDP-diacylglycerol biosynthesis I|g__Escherichia.s__Escherichia_coli	5.85099e-05	0.000208506	1.83334	-13.1443
PWY0-1319: CDP-diacylglycerol biosynthesis II|g__Escherichia.s__Escherichia_coli	5.85099e-05	0.000208506	1.83334	-13.1443
PWY-5686: UMP biosynthesis|g__Bacteroides.s__Bacteroides_nordii	4.52343e-05	0.000160442	1.82656	-13.5189
PWY-6703: preQ0 biosynthesis|g__Bacteroides.s__Bacteroides_uniformis	0.00572342	0.0202885	1.82571	-6.53605
PWY-7221: guanosine ribonucleotides de novo biosynthesis|g__Bifidobacterium.s__Bifidobacterium_longum	0.000101735	0.000360261	1.82423	-12.3508
COA-PWY: coenzyme A biosynthesis I|g__Blautia.s__Ruminococcus_torques	7.47812e-05	0.000263428	1.81666	-12.7986
PWY-1269: CMP-3-deoxy-D-manno-octulosonate biosynthesis I|g__Akkermansia.s__Akkermansia_muciniphila	0.000152347	0.000534702	1.81138	-11.7747
PWY-7219: adenosine ribonucleotides de novo biosynthesis|g__Escherichia.s__Escherichia_coli	2.64984e-05	9.29402e-05	1.8104	-14.2985
ARO-PWY: chorismate biosynthesis I|g__Akkermansia.s__Akkermansia_muciniphila	0.000199463	0.00069893	1.80903	-11.3871
P124-PWY: Bifidobacterium shunt|unclassified	0.00334255	0.0116797	1.80498	-7.32234
SULFATE-CYS-PWY: superpathway of sulfate assimilation and cysteine biosynthesis|unclassified	0.00057985	0.00202527	1.80437	-9.84985
PWY-7221: guanosine ribonucleotides de novo biosynthesis|g__Alistipes.s__Alistipes_senegalensis	2.83731e-05	9.87832e-05	1.79974	-14.2052
ARGININE-SYN4-PWY: L-ornithine de novo biosynthesis|g__Bacteroides.s__Bacteroides_thetaiotaomicron	0.000595478	0.00206595	1.79468	-9.81632
OANTIGEN-PWY: O-antigen building blocks biosynthesis (E. coli)|unclassified	0.000439842	0.00152592	1.79463	-10.2534
PWY-5913: TCA cycle VI (obligate autotrophs)|g__Escherichia.s__Escherichia_coli	4.01229e-05	0.00013867	1.78916	-13.7106
RHAMCAT-PWY: L-rhamnose degradation I|g__Blautia.s__Ruminococcus_torques	8.4081e-05	0.000289866	1.78553	-12.6451
PANTOSYN-PWY: pantothenate and coenzyme A biosynthesis I|unclassified	0.00514286	0.0176514	1.77914	-6.71364
PWY-7269: NAD/NADP-NADH/NADPH mitochondrial interconversion (yeast)|g__Escherichia.s__Escherichia_coli	5.43793e-05	0.000186184	1.7756	-13.2788
PWY-5347: superpathway of L-methionine biosynthesis (transsulfuration)|unclassified	0.00302516	0.0103344	1.77237	-7.48259
P4-PWY: superpathway of L-lysine. L-threonine and L-methionine biosynthesis I|unclassified	0.000503519	0.00171218	1.76572	-10.0728
PWY-5686: UMP biosynthesis|g__Bifidobacterium.s__Bifidobacterium_longum	5.42531e-05	0.000182072	1.74673	-13.2966
MET-SAM-PWY: superpathway of S-adenosyl-L-methionine biosynthesis|unclassified	0.0037948	0.0126931	1.74195	-7.17079
PWY0-781: aspartate superpathway|unclassified	0.000533445	0.00178104	1.73931	-10.0027
PWY-5686: UMP biosynthesis|g__Bacteroides.s__Bacteroides_thetaiotaomicron	0.00063173	0.00209858	1.73204	-9.76239
PWY-5104: L-isoleucine biosynthesis IV|unclassified	0.0061317	0.0203104	1.72786	-6.48557
DAPLYSINESYN-PWY: L-lysine biosynthesis I|unclassified	0.000316499	0.0010477	1.72695	-10.762
PWY0-845: superpathway of pyridoxal 5'-phosphate biosynthesis and salvage|g__Bacteroides.s__Bacteroides_uniformis	0.00525744	0.0173665	1.72388	-6.70949
PENTOSE-P-PWY: pentose phosphate pathway|unclassified	0.000313249	0.00103387	1.72267	-10.7791
UNINTEGRATED|g__Escherichia.s__Escherichia_coli	0.143225	0.472433	1.72183	-1.94273
PWY-5101: L-isoleucine biosynthesis II|g__Methanobrevibacter.s__Methanobrevibacter_smithii	0.000103882	0.000342251	1.72011	-12.3727
PWY-3841: folate transformations II|g__Streptococcus.s__Streptococcus_parasanguinis	0.000183276	0.000600075	1.71113	-11.5581
HISTSYN-PWY: L-histidine biosynthesis|unclassified	0.00645601	0.021131	1.71064	-6.41982
PWY-5100: pyruvate fermentation to acetate and lactate II|g__Streptococcus.s__Streptococcus_infantis	2.63669e-05	8.60092e-05	1.70576	-14.358
PANTO-PWY: phosphopantothenate biosynthesis I|g__Bacteroides.s__Bacteroides_thetaiotaomicron	0.000612558	0.00199086	1.70047	-9.82263
PYRIDOXSYN-PWY: pyridoxal 5'-phosphate biosynthesis I|g__Bacteroides.s__Bacteroides_uniformis	0.00551686	0.0179124	1.69904	-6.65242
HISTSYN-PWY: L-histidine biosynthesis|g__Bacteroides.s__Bacteroides_thetaiotaomicron	0.000744902	0.00240318	1.68982	-9.54575
PWY-6803: phosphatidylcholine acyl editing|g__Escherichia.s__Escherichia_coli	0.000149916	0.000483201	1.68847	-11.8593
PWY-7208: superpathway of pyrimidine nucleobases salvage|g__Methanobrevibacter.s__Methanobrevibacter_smithii	0.000136622	0.000439434	1.68546	-11.9948
UNINTEGRATED|g__Alistipes.s__Alistipes_putredinis	0.768847	2.47143	1.68458	0.463056
PWY-6823: molybdenum cofactor biosynthesis|g__Escherichia.s__Escherichia_coli	7.47846e-05	0.000239439	1.67885	-12.8675
PWY-4702: phytate degradation I|g__Akkermansia.s__Akkermansia_muciniphila	0.000154204	0.000493179	1.67727	-11.8242
SO4ASSIM-PWY: sulfate reduction I (assimilatory)|g__Escherichia.s__Escherichia_coli	0.000126825	0.000404265	1.67246	-12.1086
LACTOSECAT-PWY: lactose and galactose degradation I|g__Streptococcus.s__Streptococcus_australis	0.000100592	0.000319745	1.66841	-12.445
SER-GLYSYN-PWY: superpathway of L-serine and glycine biosynthesis I|unclassified	0.00489636	0.0155482	1.66697	-6.84059
PWY-5695: urate biosynthesis/inosine 5'-phosphate degradation|g__Bacteroides.s__Bacteroides_ovatus	0.000511664	0.00161563	1.65883	-10.1031
PWY-7357: thiamin formation from pyrithiamine and oxythiamine (yeast)|g__Blautia.s__Ruminococcus_torques	0.000167909	0.00052898	1.65553	-11.7123
PWY-7111: pyruvate fermentation to isobutanol (engineered)|g__Bacteroides.s__Bacteroides_dorei	0.00134336	0.00421968	1.65129	-8.7143
PWY-6897: thiamin salvage II|g__Escherichia.s__Escherichia_coli	3.73735e-05	0.000117289	1.64999	-13.8826
PWY-5154: L-arginine biosynthesis III (via N-acetyl-L-citrulline)|unclassified	0.00164755	0.0051699	1.64981	-8.42055
PWY-7111: pyruvate fermentation to isobutanol (engineered)|g__Streptococcus.s__Streptococcus_australis	4.60805e-05	0.000144405	1.64789	-13.5815
ANAGLYCOLYSIS-PWY: glycolysis III (from glucose)|g__Bacteroides.s__Bacteroides_sp_2_1_22	4.70131e-05	0.000147275	1.64737	-13.5529
GLUTORN-PWY: L-ornithine biosynthesis|g__Blautia.s__Ruminococcus_torques	0.000103982	0.000325681	1.64713	-12.4078
PWY-7400: L-arginine biosynthesis IV (archaebacteria)|g__Bifidobacterium.s__Bifidobacterium_longum	6.32684e-05	0.00019811	1.64674	-13.1248
PWY-3841: folate transformations II|unclassified	0.00251289	0.00782577	1.63889	-7.81699
PWY-6163: chorismate biosynthesis from 3-dehydroquinate|g__Akkermansia.s__Akkermansia_muciniphila	0.000194513	0.000604276	1.63534	-11.5102
ARGSYN-PWY: L-arginine biosynthesis I (via L-ornithine)|g__Bifidobacterium.s__Bifidobacterium_longum	6.29111e-05	0.000195274	1.63411	-13.1393
PWY-6124: inosine-5'-phosphate biosynthesis II|g__Methanobrevibacter.s__Methanobrevibacter_smithii	0.000107816	0.000334342	1.63275	-12.3628
PWY-5695: urate biosynthesis/inosine 5'-phosphate degradation|g__Bacteroides.s__Bacteroides_thetaiotaomicron	0.000634534	0.00194937	1.61924	-9.81239
PWY-7663: gondoate biosynthesis (anaerobic)|g__Bacteroides.s__Bacteroides_thetaiotaomicron	0.000619337	0.0019026	1.61917	-9.8474
PWY-6609: adenine and adenosine salvage III|g__Bacteroides.s__Bacteroides_thetaiotaomicron	0.000568274	0.00173541	1.61062	-9.97582
HSERMETANA-PWY: L-methionine biosynthesis III|g__Methanobrevibacter.s__Methanobrevibacter_smithii	0.000157793	0.000481409	1.60923	-11.8251
PWY-5667: CDP-diacylglycerol biosynthesis I|g__Bacteroides.s__Bacteroides_thetaiotaomicron	0.000770611	0.00234414	1.60498	-9.53922
PWY0-1319: CDP-diacylglycerol biosynthesis II|g__Bacteroides.s__Bacteroides_thetaiotaomicron	0.000770611	0.00234414	1.60498	-9.53922
PWY-7229: superpathway of adenosine nucleotides de novo biosynthesis I|g__Bacteroides.s__Bacteroides_dorei	0.00132644	0.00403221	1.60402	-8.75622
SALVADEHYPOX-PWY: adenosine nucleotides degradation II|g__Escherichia.s__Escherichia_coli	0.000101559	0.000307188	1.5968	-12.467
PWY-6168: flavin biosynthesis III (fungi)|g__Bacteroides.s__Bacteroides_thetaiotaomicron	0.000657742	0.00198378	1.59266	-9.77386
NONOXIPENT-PWY: pentose phosphate pathway (non-oxidative branch)|g__Bacteroides.s__Bacteroides_thetaiotaomicron	0.000694997	0.0020925	1.59015	-9.69563
PWY-6527: stachyose degradation|unclassified	0.00856202	0.0257097	1.58629	-6.07469
PANTO-PWY: phosphopantothenate biosynthesis I|unclassified	0.011486	0.0344087	1.58289	-5.65253
PWY-6700: queuosine biosynthesis|g__Dialister.s__Dialister_invisus	0.0118748	0.00396352	-1.58305	-7.18748
PWY-2942: L-lysine biosynthesis III|g__Bacteroides.s__Bacteroides_fragilis	0.000836495	0.000274666	-1.60668	-11.0267
PWY-7208: superpathway of pyrimidine nucleobases salvage|g__Dialister.s__Dialister_invisus	0.00777346	0.00255083	-1.60759	-7.81102
PWY-7111: pyruvate fermentation to isobutanol (engineered)|g__Eubacterium.s__Eubacterium_rectale	0.0028961	0.000930974	-1.6373	-9.25032
VALSYN-PWY: L-valine biosynthesis|g__Eubacterium.s__Eubacterium_rectale	0.0028961	0.000930974	-1.6373	-9.25032
PWY-5667: CDP-diacylglycerol biosynthesis I|g__Blautia.s__Ruminococcus_torques	0.00061685	0.000197577	-1.64251	-11.484
PWY0-1319: CDP-diacylglycerol biosynthesis II|g__Blautia.s__Ruminococcus_torques	0.00061685	0.000197577	-1.64251	-11.484
HOMOSER-METSYN-PWY: L-methionine biosynthesis I|g__Streptococcus.s__Streptococcus_sanguinis	3.55214e-05	1.11156e-05	-1.6761	-15.619
PWY-6121: 5-aminoimidazole ribonucleotide biosynthesis I|g__Clostridium.s__Clostridium_bolteae	0.000223167	6.98042e-05	-1.67674	-12.968
PWY-3841: folate transformations II|g__Bacteroides.s__Bacteroides_massiliensis	0.00146574	0.000456396	-1.68327	-10.2558
PWY-7663: gondoate biosynthesis (anaerobic)|g__Bacteroides.s__Bacteroides_fragilis	0.000990915	0.000308355	-1.68417	-10.821
PWY-7197: pyrimidine deoxyribonucleotide phosphorylation|g__Dialister.s__Dialister_invisus	0.00828054	0.00256901	-1.68851	-7.76032
UNINTEGRATED|g__Roseburia.s__Roseburia_intestinalis	1.32439	0.405043	-1.70918	-0.449264
UNINTEGRATED|g__Blautia.s__Ruminococcus_gnavus	1.78962	0.547062	-1.70988	-0.0152855
PWY-7221: guanosine ribonucleotides de novo biosynthesis|g__Clostridium.s__Clostridium_bolteae	0.000304714	9.21386e-05	-1.72558	-12.543
PWY-6612: superpathway of tetrahydrofolate biosynthesis|g__Escherichia.s__Escherichia_coli	9.06553e-05	2.68231e-05	-1.75692	-14.3077
PWY-6151: S-adenosyl-L-methionine cycle I|g__Eubacterium.s__Eubacterium_rectale	0.0034283	0.000994226	-1.78585	-9.08122
PWY-5686: UMP biosynthesis|g__Lachnospiraceae_noname.s__Lachnospiraceae_bacterium_1_4_56FAA	0.000324773	9.32602e-05	-1.8001	-12.4883
DTDPRHAMSYN-PWY: dTDP-L-rhamnose biosynthesis I|g__Eubacterium.s__Eubacterium_rectale	0.00262501	0.000748886	-1.80951	-9.47821
PWY-5667: CDP-diacylglycerol biosynthesis I|g__Eubacterium.s__Eubacterium_rectale	0.00253681	0.00072079	-1.81536	-9.53045
PWY0-1319: CDP-diacylglycerol biosynthesis II|g__Eubacterium.s__Eubacterium_rectale	0.00253681	0.00072079	-1.81536	-9.53045
THRESYN-PWY: superpathway of L-threonine biosynthesis|g__Bifidobacterium.s__Bifidobacterium_adolescentis	0.000850078	0.000233484	-1.86427	-11.1323
PWY-5188: tetrapyrrole biosynthesis I (from glutamate)|g__Lachnospiraceae_noname.s__Lachnospiraceae_bacterium_7_1_58FAA	0.000127855	3.47966e-05	-1.87749	-13.8719
NONMEVIPP-PWY: methylerythritol phosphate pathway I|g__Blautia.s__Ruminococcus_gnavus	0.00136563	0.000370578	-1.88171	-10.4571
PYRIDOXSYN-PWY: pyridoxal 5'-phosphate biosynthesis I|g__Bacteroides.s__Bacteroides_fragilis	0.000736522	0.000199772	-1.88238	-11.3482
PWY-6700: queuosine biosynthesis|g__Bacteroides.s__Bacteroides_stercoris	0.0279518	0.00752775	-1.89265	-6.10724
COBALSYN-PWY: adenosylcobalamin salvage from cobinamide I|g__Eubacterium.s__Eubacterium_rectale	0.00223703	0.000597975	-1.90343	-9.75591
PANTO-PWY: phosphopantothenate biosynthesis I|g__Bacteroides.s__Bacteroides_fragilis	0.000893765	0.000238729	-1.90452	-11.0801
PWY-6700: queuosine biosynthesis|g__Bacteroides.s__Bacteroides_fragilis	0.000717569	0.000188006	-1.93234	-11.4108
GLYCOGENSYNTH-PWY: glycogen biosynthesis I (from ADP-D-Glucose)|g__Eubacterium.s__Eubacterium_rectale	0.00338861	0.000885708	-1.93579	-9.17299
PWY-6386: UDP-N-acetylmuramoyl-pentapeptide biosynthesis II (lysine-containing)|g__Eubacterium.s__Eubacterium_rectale	0.00267797	0.000677836	-1.98213	-9.53571
PWY-621: sucrose degradation III (sucrose invertase)|g__Eubacterium.s__Eubacterium_rectale	0.0027764	0.000701077	-1.98557	-9.48535
PWY-6387: UDP-N-acetylmuramoyl-pentapeptide biosynthesis I (meso-diaminopimelate containing)|g__Eubacterium.s__Eubacterium_rectale	0.00259213	0.000642577	-2.0122	-9.59774
TRPSYN-PWY: L-tryptophan biosynthesis|g__Bacteroides.s__Bacteroides_fragilis	0.00069191	0.000171428	-2.01298	-11.5036
PWY-6163: chorismate biosynthesis from 3-dehydroquinate|g__Eubacterium.s__Eubacterium_rectale	0.00328285	0.000809224	-2.02034	-9.26101
COMPLETE-ARO-PWY: superpathway of aromatic amino acid biosynthesis|g__Eubacterium.s__Eubacterium_rectale	0.00309298	0.000761509	-2.02206	-9.34782
PWY-7219: adenosine ribonucleotides de novo biosynthesis|g__Lachnospiraceae_noname.s__Lachnospiraceae_bacterium_1_4_56FAA	0.000326365	7.97824e-05	-2.03234	-12.5974
PWY-6122: 5-aminoimidazole ribonucleotide biosynthesis II|g__Clostridium.s__Clostridium_bolteae	0.000250213	6.05931e-05	-2.04593	-12.9875
PWY-6277: superpathway of 5-aminoimidazole ribonucleotide biosynthesis|g__Clostridium.s__Clostridium_bolteae	0.000250213	6.05931e-05	-2.04593	-12.9875
PWY-7228: superpathway of guanosine nucleotides de novo biosynthesis I|g__Dialister.s__Dialister_invisus	0.0123429	0.002968	-2.05612	-7.36824
PWY-5097: L-lysine biosynthesis VI|g__Bacteroides.s__Bacteroides_stercoris	0.0266359	0.00633306	-2.0724	-6.26668
ARO-PWY: chorismate biosynthesis I|g__Eubacterium.s__Eubacterium_rectale	0.00307674	0.00072985	-2.07573	-9.38225
UNINTEGRATED|g__Dialister.s__Dialister_invisus	6.02799	1.42499	-2.08072	1.55132
PWY-5861: superpathway of demethylmenaquinol-8 biosynthesis|g__Escherichia.s__Escherichia_coli	0.000176135	4.13891e-05	-2.08936	-13.5157
PWY-6163: chorismate biosynthesis from 3-dehydroquinate|g__Bacteroides.s__Bacteroides_fragilis	0.000999824	0.0002344	-2.0927	-11.0124
PWY-2942: L-lysine biosynthesis III|g__Bacteroides.s__Bacteroides_stercoris	0.0330382	0.00761232	-2.11773	-5.97858
PWY-7221: guanosine ribonucleotides de novo biosynthesis|g__Eubacterium.s__Eubacterium_rectale	0.00252308	0.000576927	-2.12872	-9.69496
FOLSYN-PWY: superpathway of tetrahydrofolate biosynthesis and salvage|g__Escherichia.s__Escherichia_coli	0.000131614	2.99172e-05	-2.13726	-13.96
PWY-6163: chorismate biosynthesis from 3-dehydroquinate|g__Blautia.s__Ruminococcus_gnavus	0.0012477	0.000278991	-2.16098	-10.727
PWY-5667: CDP-diacylglycerol biosynthesis I|g__Blautia.s__Ruminococcus_gnavus	0.00146624	0.000324961	-2.17379	-10.5006
PWY0-1319: CDP-diacylglycerol biosynthesis II|g__Blautia.s__Ruminococcus_gnavus	0.00146624	0.000324961	-2.17379	-10.5006
HISTSYN-PWY: L-histidine biosynthesis|g__Bifidobacterium.s__Bifidobacterium_adolescentis	0.000634881	0.000139822	-2.18289	-11.7127
PWY-6151: S-adenosyl-L-methionine cycle I|g__Bacteroides.s__Bacteroides_stercoris	0.0274264	0.00603314	-2.18458	-6.28058
PWY-5667: CDP-diacylglycerol biosynthesis I|g__Lachnospiraceae_noname.s__Lachnospiraceae_bacterium_1_4_56FAA	0.000321992	7.08267e-05	-2.18466	-12.693
PWY0-1319: CDP-diacylglycerol biosynthesis II|g__Lachnospiraceae_noname.s__Lachnospiraceae_bacterium_1_4_56FAA	0.000321992	7.08267e-05	-2.18466	-12.693
COA-PWY-1: coenzyme A biosynthesis II (mammalian)|g__Bifidobacterium.s__Bifidobacterium_adolescentis	0.000979833	0.000213594	-2.19766	-11.094
1CMET2-PWY: N10-formyl-tetrahydrofolate biosynthesis|g__Bacteroides.s__Bacteroides_stercoris	0.0247199	0.00537602	-2.20106	-6.43871
PWY-7111: pyruvate fermentation to isobutanol (engineered)|g__Bacteroides.s__Bacteroides_stercoris	0.0232285	0.00494795	-2.23099	-6.54346
VALSYN-PWY: L-valine biosynthesis|g__Bacteroides.s__Bacteroides_stercoris	0.0232285	0.00494795	-2.23099	-6.54346
PWY-5097: L-lysine biosynthesis VI|g__Eubacterium.s__Eubacterium_rectale	0.00286458	0.000608365	-2.23531	-9.56512
PWY-5695: urate biosynthesis/inosine 5'-phosphate degradation|g__Bacteroides.s__Bacteroides_stercoris	0.0261631	0.00547338	-2.25703	-6.38484
PWY-6385: peptidoglycan biosynthesis III (mycobacteria)|g__Bacteroides.s__Bacteroides_fragilis	0.000625261	0.000130548	-2.25988	-11.7732
PWY-5686: UMP biosynthesis|g__Bacteroides.s__Bacteroides_stercoris	0.0242551	0.00501177	-2.27489	-6.50302
PWY-6386: UDP-N-acetylmuramoyl-pentapeptide biosynthesis II (lysine-containing)|g__Bacteroides.s__Bacteroides_fragilis	0.00063744	0.000131172	-2.28083	-11.7558
PWY-6122: 5-aminoimidazole ribonucleotide biosynthesis II|g__Bifidobacterium.s__Bifidobacterium_adolescentis	0.000921595	0.000189197	-2.28425	-11.2257
PWY-6277: superpathway of 5-aminoimidazole ribonucleotide biosynthesis|g__Bifidobacterium.s__Bifidobacterium_adolescentis	0.000921595	0.000189197	-2.28425	-11.2257
PWY-7221: guanosine ribonucleotides de novo biosynthesis|g__Dialister.s__Dialister_invisus	0.0163828	0.00336059	-2.28539	-7.07437
PWY-5667: CDP-diacylglycerol biosynthesis I|g__Bacteroides.s__Bacteroides_stercoris	0.0287412	0.00582321	-2.30324	-6.27235
PWY0-1319: CDP-diacylglycerol biosynthesis II|g__Bacteroides.s__Bacteroides_stercoris	0.0287412	0.00582321	-2.30324	-6.27235
PWY-6737: starch degradation V|g__Blautia.s__Ruminococcus_gnavus	0.00246226	0.000496646	-2.30969	-9.82065
PWY-5686: UMP biosynthesis|g__Eubacterium.s__Eubacterium_rectale	0.00264898	0.000534143	-2.31014	-9.71542
PANTO-PWY: phosphopantothenate biosynthesis I|g__Bacteroides.s__Bacteroides_stercoris	0.0238151	0.00479643	-2.31184	-6.5479
HEMESYN2-PWY: heme biosynthesis II (anaerobic)|unclassified	0.00179013	0.000359841	-2.31463	-10.283
PYRIDOXSYN-PWY: pyridoxal 5'-phosphate biosynthesis I|g__Bacteroides.s__Bacteroides_stercoris	0.0251268	0.00504353	-2.31672	-6.47299
NONMEVIPP-PWY: methylerythritol phosphate pathway I|g__Eubacterium.s__Eubacterium_rectale	0.00266912	0.000533367	-2.32316	-9.711
PWY-7219: adenosine ribonucleotides de novo biosynthesis|g__Bifidobacterium.s__Bifidobacterium_adolescentis	0.00145718	0.000283748	-2.3605	-10.6029
PWY-6703: preQ0 biosynthesis|g__Bacteroides.s__Bacteroides_stercoris	0.0439289	0.00854577	-2.36189	-5.68963
PANTO-PWY: phosphopantothenate biosynthesis I|g__Eubacterium.s__Eubacterium_rectale	0.00247672	0.000477173	-2.37585	-9.84528
COA-PWY-1: coenzyme A biosynthesis II (mammalian)|g__Clostridium.s__Clostridium_bolteae	0.000283846	5.40073e-05	-2.39388	-12.9795
PWY-3841: folate transformations II|g__Bacteroides.s__Bacteroides_stercoris	0.0256279	0.00486453	-2.39734	-6.48481
COA-PWY-1: coenzyme A biosynthesis II (mammalian)|g__Erysipelotrichaceae_noname.s__Eubacterium_biforme	0.000353202	6.66443e-05	-2.40594	-12.6702
PWY-5686: UMP biosynthesis|g__Blautia.s__Ruminococcus_gnavus	0.00129554	0.000243799	-2.40979	-10.7971
COA-PWY-1: coenzyme A biosynthesis II (mammalian)|g__Eubacterium.s__Eubacterium_rectale	0.00273476	0.000512024	-2.41713	-9.72294
PWY-5367: petroselinate biosynthesis|g__Eubacterium.s__Eubacterium_rectale	0.00345962	0.000642051	-2.42985	-9.3901
PWY-6124: inosine-5'-phosphate biosynthesis II|g__Bacteroides.s__Bacteroides_fragilis	0.00087207	0.00016081	-2.43908	-11.3828
PWY-7219: adenosine ribonucleotides de novo biosynthesis|g__Bacteroides.s__Bacteroides_stercoris	0.0455248	0.00836016	-2.44505	-5.67973
PWY-5973: cis-vaccenate biosynthesis|g__Eubacterium.s__Eubacterium_rectale	0.00340575	0.000623088	-2.45047	-9.42304
PWY-7221: guanosine ribonucleotides de novo biosynthesis|g__Blautia.s__Ruminococcus_gnavus	0.00190527	0.000347319	-2.45566	-10.2636
PWY-6386: UDP-N-acetylmuramoyl-pentapeptide biosynthesis II (lysine-containing)|g__Bifidobacterium.s__Bifidobacterium_adolescentis	0.000804827	0.000145711	-2.46557	-11.5118
PWY-6387: UDP-N-acetylmuramoyl-pentapeptide biosynthesis I (meso-diaminopimelate containing)|g__Bifidobacterium.s__Bifidobacterium_adolescentis	0.00076717	0.000138251	-2.47225	-11.5843
NONMEVIPP-PWY: methylerythritol phosphate pathway I|g__Bifidobacterium.s__Bifidobacterium_adolescentis	0.000882416	0.000148218	-2.57374	-11.4331
NONOXIPENT-PWY: pentose phosphate pathway (non-oxidative branch)|g__Blautia.s__Ruminococcus_gnavus	0.00236707	0.000396749	-2.5768	-10.0111
VALSYN-PWY: L-valine biosynthesis|g__Bifidobacterium.s__Bifidobacterium_adolescentis	0.000973298	0.000162755	-2.58018	-11.2949
PWY-2942: L-lysine biosynthesis III|g__Blautia.s__Ruminococcus_gnavus	0.00201014	0.00033574	-2.58188	-10.2494
PEPTIDOGLYCANSYN-PWY: peptidoglycan biosynthesis I (meso-diaminopimelate containing)|g__Bifidobacterium.s__Bifidobacterium_adolescentis	0.000797446	0.000131898	-2.59597	-11.5903
PWY-5097: L-lysine biosynthesis VI|g__Blautia.s__Ruminococcus_gnavus	0.00207327	0.000341806	-2.60065	-10.2142
PWY-7219: adenosine ribonucleotides de novo biosynthesis|g__Blautia.s__Ruminococcus_gnavus	0.00212756	0.000346389	-2.61873	-10.186
PWY-6151: S-adenosyl-L-methionine cycle I|g__Blautia.s__Ruminococcus_gnavus	0.00277185	0.000444717	-2.63989	-9.81488
UDPNAGSYN-PWY: UDP-N-acetyl-D-glucosamine biosynthesis I|g__Bifidobacterium.s__Bifidobacterium_adolescentis	0.000830271	0.000128085	-2.69648	-11.5824
PWY-5103: L-isoleucine biosynthesis III|g__Escherichia.s__Escherichia_coli	0.000137034	2.0367e-05	-2.75023	-14.2083
PWY-6123: inosine-5'-phosphate biosynthesis I|g__Bacteroides.s__Bacteroides_fragilis	0.000875744	0.00012755	-2.77945	-11.5469
UNINTEGRATED|g__Eubacterium.s__Eubacterium_siraeum	1.96789	0.285239	-2.78641	-0.416551
ARGININE-SYN4-PWY: L-ornithine de novo biosynthesis|g__Bacteroides.s__Bacteroides_stercoris	0.0347046	0.00498125	-2.80055	-6.249
PWY0-1296: purine ribonucleosides degradation|g__Lachnospiraceae_noname.s__Lachnospiraceae_bacterium_1_4_56FAA	0.000309054	4.36748e-05	-2.82299	-13.0713
PWY-6121: 5-aminoimidazole ribonucleotide biosynthesis I|g__Blautia.s__Ruminococcus_gnavus	0.0016393	0.000228347	-2.84378	-10.6746
PWY-7221: guanosine ribonucleotides de novo biosynthesis|g__Clostridium.s__Clostridium_symbiosum	0.000455229	6.14575e-05	-2.88893	-12.5456
PWY-6122: 5-aminoimidazole ribonucleotide biosynthesis II|g__Blautia.s__Ruminococcus_gnavus	0.00155223	0.000198989	-2.96358	-10.8132
PWY-6277: superpathway of 5-aminoimidazole ribonucleotide biosynthesis|g__Blautia.s__Ruminococcus_gnavus	0.00155223	0.000198989	-2.96358	-10.8132
PWY-7663: gondoate biosynthesis (anaerobic)|g__Bacteroides.s__Bacteroides_stercoris	0.0316352	0.00366547	-3.10946	-6.53706
PWY-6151: S-adenosyl-L-methionine cycle I|g__Bifidobacterium.s__Bifidobacterium_adolescentis	0.00106775	0.000118982	-3.16576	-11.4541
UNINTEGRATED|g__Bacteroides.s__Bacteroides_stercoris	22.7054	2.4128	-3.23426	2.88784
PWY0-1296: purine ribonucleosides degradation|g__Blautia.s__Ruminococcus_gnavus	0.00202204	0.000212431	-3.25075	-10.5753
PANTO-PWY: phosphopantothenate biosynthesis I|g__Blautia.s__Ruminococcus_gnavus	0.00237988	0.000235683	-3.33597	-10.3829
PANTO-PWY: phosphopantothenate biosynthesis I|g__Lachnospiraceae_noname.s__Lachnospiraceae_bacterium_3_1_46FAA	0.000258461	2.46338e-05	-3.39124	-13.6134
ILEUSYN-PWY: L-isoleucine biosynthesis I (from threonine)|g__Eubacterium.s__Eubacterium_siraeum	0.00284359	0.000236247	-3.58934	-10.2527
VALSYN-PWY: L-valine biosynthesis|g__Eubacterium.s__Eubacterium_siraeum	0.00284359	0.000236247	-3.58934	-10.2527
PWY-6386: UDP-N-acetylmuramoyl-pentapeptide biosynthesis II (lysine-containing)|g__Blautia.s__Ruminococcus_gnavus	0.00199652	0.000164996	-3.59698	-10.7668
PEPTIDOGLYCANSYN-PWY: peptidoglycan biosynthesis I (meso-diaminopimelate containing)|g__Blautia.s__Ruminococcus_gnavus	0.00188344	0.00015266	-3.62497	-10.8649
BRANCHED-CHAIN-AA-SYN-PWY: superpathway of branched amino acid biosynthesis|g__Eubacterium.s__Eubacterium_siraeum	0.002466	0.000198129	-3.63766	-10.4824
PWY-5103: L-isoleucine biosynthesis III|g__Eubacterium.s__Eubacterium_siraeum	0.00229432	0.000182048	-3.65567	-10.5956
PWY-7111: pyruvate fermentation to isobutanol (engineered)|g__Eubacterium.s__Eubacterium_siraeum	0.00226347	0.000168827	-3.74492	-10.6597
COA-PWY-1: coenzyme A biosynthesis II (mammalian)|g__Blautia.s__Ruminococcus_gnavus	0.00178918	0.00013296	-3.75023	-11.0016
PWY-5100: pyruvate fermentation to acetate and lactate II|g__Roseburia.s__Roseburia_intestinalis	0.000948249	6.99481e-05	-3.76091	-11.9229
PWY-6387: UDP-N-acetylmuramoyl-pentapeptide biosynthesis I (meso-diaminopimelate containing)|g__Blautia.s__Ruminococcus_gnavus	0.00185705	0.000133783	-3.79504	-10.9703
PWY-6737: starch degradation V|g__Clostridium.s__Clostridium_symbiosum	0.000367295	2.59846e-05	-3.82121	-13.3214
NONOXIPENT-PWY: pentose phosphate pathway (non-oxidative branch)|g__Roseburia.s__Roseburia_intestinalis	0.00128155	9.02539e-05	-3.82776	-11.5218
PWY66-422: D-galactose degradation V (Leloir pathway)|g__Roseburia.s__Roseburia_intestinalis	0.000945136	6.06216e-05	-3.96262	-12.0285
PWY66-422: D-galactose degradation V (Leloir pathway)|g__Eubacterium.s__Eubacterium_siraeum	0.00209904	0.000122218	-4.1022	-10.9472
SER-GLYSYN-PWY: superpathway of L-serine and glycine biosynthesis I|g__Roseburia.s__Roseburia_intestinalis	0.000642325	3.68245e-05	-4.12457	-12.6667
NONOXIPENT-PWY: pentose phosphate pathway (non-oxidative branch)|g__Eubacterium.s__Eubacterium_siraeum	0.00319723	0.000182503	-4.13083	-10.3544
PWY-7456: mannan degradation|g__Eubacterium.s__Eubacterium_siraeum	0.00220974	0.000125276	-4.14069	-10.8923
PWY-7357: thiamin formation from pyrithiamine and oxythiamine (yeast)|g__Eubacterium.s__Eubacterium_siraeum	0.00196586	0.000104611	-4.23206	-11.1067
PWY-6121: 5-aminoimidazole ribonucleotide biosynthesis I|g__Eubacterium.s__Eubacterium_siraeum	0.00231437	0.000122607	-4.23851	-10.8744
PWY-7357: thiamin formation from pyrithiamine and oxythiamine (yeast)|g__Roseburia.s__Roseburia_intestinalis	0.00104408	5.47347e-05	-4.25363	-12.0304
PWY-6527: stachyose degradation|g__Eubacterium.s__Eubacterium_siraeum	0.00264015	0.000133908	-4.30131	-10.7158
PWY-6317: galactose degradation I (Leloir pathway)|g__Roseburia.s__Roseburia_intestinalis	0.000760915	3.58672e-05	-4.407	-12.5635
PWY-7219: adenosine ribonucleotides de novo biosynthesis|g__Roseburia.s__Roseburia_intestinalis	0.00168258	7.58161e-05	-4.47202	-11.4511
PWY-6122: 5-aminoimidazole ribonucleotide biosynthesis II|g__Eubacterium.s__Eubacterium_siraeum	0.00240575	0.000107924	-4.4784	-10.9385
PWY-6277: superpathway of 5-aminoimidazole ribonucleotide biosynthesis|g__Eubacterium.s__Eubacterium_siraeum	0.00240575	0.000107924	-4.4784	-10.9385
PWY-5659: GDP-mannose biosynthesis|g__Eubacterium.s__Eubacterium_siraeum	0.00210709	9.4197e-05	-4.48343	-11.1322
PANTO-PWY: phosphopantothenate biosynthesis I|g__Roseburia.s__Roseburia_intestinalis	0.000707069	3.01254e-05	-4.5528	-12.7423
PWY-7221: guanosine ribonucleotides de novo biosynthesis|g__Eubacterium.s__Eubacterium_siraeum	0.00222658	9.31713e-05	-4.5788	-11.1004
PWY-6527: stachyose degradation|g__Roseburia.s__Roseburia_intestinalis	0.000731277	2.83354e-05	-4.68974	-12.7622
GLYCOGENSYNTH-PWY: glycogen biosynthesis I (from ADP-D-Glucose)|g__Roseburia.s__Roseburia_intestinalis	0.0010883	4.04482e-05	-4.74986	-12.2186
PWY-5097: L-lysine biosynthesis VI|g__Eubacterium.s__Eubacterium_siraeum	0.00199476	7.32528e-05	-4.76718	-11.3532
PWY-2942: L-lysine biosynthesis III|g__Eubacterium.s__Eubacterium_siraeum	0.00194053	7.01427e-05	-4.79002	-11.4043
PWY-5104: L-isoleucine biosynthesis IV|g__Roseburia.s__Roseburia_intestinalis	0.000808937	2.91868e-05	-4.79264	-12.668
PWY-6122: 5-aminoimidazole ribonucleotide biosynthesis II|g__Roseburia.s__Roseburia_intestinalis	0.000700245	2.51184e-05	-4.80104	-12.8804
PWY-6277: superpathway of 5-aminoimidazole ribonucleotide biosynthesis|g__Roseburia.s__Roseburia_intestinalis	0.000700245	2.51184e-05	-4.80104	-12.8804
PWY-6121: 5-aminoimidazole ribonucleotide biosynthesis I|g__Roseburia.s__Roseburia_intestinalis	0.000732947	2.62291e-05	-4.80447	-12.8162
ASPASN-PWY: superpathway of L-aspartate and L-asparagine biosynthesis|g__Roseburia.s__Roseburia_intestinalis	0.000665667	2.3567e-05	-4.81996	-12.9629
HISTSYN-PWY: L-histidine biosynthesis|g__Eubacterium.s__Eubacterium_siraeum	0.00243441	8.11364e-05	-4.90708	-11.1358
PWY-5686: UMP biosynthesis|g__Eubacterium.s__Eubacterium_siraeum	0.00235912	7.41556e-05	-4.99155	-11.2233
PWY-6737: starch degradation V|g__Eubacterium.s__Eubacterium_siraeum	0.00276215	8.54825e-05	-5.01402	-11.007
PWY-7219: adenosine ribonucleotides de novo biosynthesis|g__Eubacterium.s__Eubacterium_siraeum	0.00298919	9.09229e-05	-5.03897	-10.9055
PYRIDNUCSYN-PWY: NAD biosynthesis I (from aspartate)|g__Eubacterium.s__Eubacterium_siraeum	0.0020666	6.17686e-05	-5.06424	-11.4506
VALSYN-PWY: L-valine biosynthesis|g__Roseburia.s__Roseburia_intestinalis	0.000957083	2.57318e-05	-5.21702	-12.6376
SER-GLYSYN-PWY: superpathway of L-serine and glycine biosynthesis I|g__Eubacterium.s__Eubacterium_siraeum	0.00227384	5.66508e-05	-5.32689	-11.4441
PWY-5384: sucrose degradation IV (sucrose phosphorylase)|g__Roseburia.s__Roseburia_intestinalis	0.000872744	1.96459e-05	-5.47326	-12.8988
PWY-7208: superpathway of pyrimidine nucleobases salvage|g__Eubacterium.s__Eubacterium_siraeum	0.00214614	4.52614e-05	-5.56732	-11.6477
PWY-6317: galactose degradation I (Leloir pathway)|g__Eubacterium.s__Eubacterium_siraeum	0.00197185	4.05983e-05	-5.60199	-11.7872
GLYCOGENSYNTH-PWY: glycogen biosynthesis I (from ADP-D-Glucose)|g__Eubacterium.s__Eubacterium_siraeum	0.00250233	3.77291e-05	-6.05145	-11.6682
PWY-6123: inosine-5'-phosphate biosynthesis I|g__Eubacterium.s__Eubacterium_siraeum	0.00220189	2.90715e-05	-6.24299	-11.9485
PWY-6124: inosine-5'-phosphate biosynthesis II|g__Eubacterium.s__Eubacterium_siraeum	0.00209133	2.60644e-05	-6.32619	-12.0645
PWY-6163: chorismate biosynthesis from 3-dehydroquinate|g__Eubacterium.s__Eubacterium_siraeum	0.0023049	2.8536e-05	-6.33578	-11.929
ARO-PWY: chorismate biosynthesis I|g__Eubacterium.s__Eubacterium_siraeum	0.00251345	2.98359e-05	-6.39648	-11.8344

## Sheet: unstratified SG changes
Table S4d: Sleeve Gastrectomy metagenomic unstratified changes.
Pathways	T0.mean	T6.mean	M (log2 fold change)	A (Log2 Abundance mean)
PWY-5913: TCA cycle VI (obligate autotrophs)	9.47226e-05	0.00464525	5.6159	-10.558
PWY-5138: unsaturated. even numbered fatty acid &beta;-oxidation	1.34189e-05	0.000537144	5.32297	-13.5239
PWY-7371: 1.4-dihydroxy-6-naphthoate biosynthesis II	4.60859e-05	0.00149104	5.01585	-11.8974
PWY-7117: C4 photosynthetic carbon assimilation cycle. PEPCK type	0.000221234	0.0068458	4.95157	-9.66635
PWY-241: C4 photosynthetic carbon assimilation cycle. NADP-ME type	0.000147879	0.00336433	4.50783	-10.4694
PWY-6467: Kdo transfer to lipid IVA III (Chlamydia)	2.25735e-05	0.000378347	4.067	-13.4015
P125-PWY: superpathway of (R.R)-butanediol biosynthesis	3.87768e-05	0.000493016	3.66837	-12.8203
PWY-922: mevalonate pathway I	0.00012552	0.00137607	3.45456	-11.2325
PWY-5173: superpathway of acetyl-CoA biosynthesis	2.05568e-05	0.000206247	3.32669	-13.9067
PWY-7384: anaerobic energy metabolism (invertebrates. mitochondrial)	0.000126	0.00106056	3.07334	-11.4176
PWY-6263: superpathway of menaquinol-8 biosynthesis II	5.94317e-05	0.000470305	2.98429	-12.5463
AEROBACTINSYN-PWY: aerobactin biosynthesis	2.24731e-05	0.000176999	2.97747	-13.9527
PWY-5910: superpathway of geranylgeranyldiphosphate biosynthesis I (via mevalonate)	0.000159506	0.00112303	2.81571	-11.2062
PWY-7269: NAD/NADP-NADH/NADPH mitochondrial interconversion (yeast)	0.000125073	0.000821111	2.71481	-11.6075
FERMENTATION-PWY: mixed acid fermentation	0.000932544	0.00572245	2.61739	-8.75785
PWY-5705: allantoin degradation to glyoxylate III	5.93671e-05	0.000339909	2.51741	-12.7813
PWY-7389: superpathway of anaerobic energy metabolism (invertebrates)	0.000350073	0.00195233	2.47947	-10.2403
PWY-7115: C4 photosynthetic carbon assimilation cycle. NAD-ME type	0.000343189	0.00180387	2.39402	-10.3117
LPSSYN-PWY: superpathway of lipopolysaccharide biosynthesis	0.000209943	0.000948284	2.17533	-11.1301
PWY0-1338: polymyxin resistance	3.85444e-05	0.0001739	2.17366	-13.5763
PWY-5464: superpathway of cytosolic glycolysis (plants). pyruvate dehydrogenase and TCA cycle	0.000241561	0.000994983	2.04228	-10.9942
PWY-6737: starch degradation V	0.0745749	0.303861	2.02665	-2.73184
PWY-5692: allantoin degradation to glyoxylate II	5.25184e-05	0.000193604	1.88222	-13.2757
URDEGR-PWY: superpathway of allantoin degradation in plants	5.25184e-05	0.000193604	1.88222	-13.2757
PWY-6174: mevalonate pathway II (archaea)	0.000113394	0.000415815	1.87459	-12.1691
PWY0-1533: methylphosphonate degradation I	0.000141435	0.000475882	1.75047	-11.9123
3-HYDROXYPHENYLACETATE-DEGRADATION-PWY: 4-hydroxyphenylacetate degradation	6.55724e-05	0.000208046	1.66575	-13.0637
P122-PWY: heterolactic fermentation	0.000464822	0.00144762	1.63893	-10.2516
PWY-5088: L-glutamate degradation VIII (to propanoate)	0.000314941	0.000974378	1.6294	-10.8179
PWY-7209: superpathway of pyrimidine ribonucleosides degradation	0.00269024	0.000898171	-1.58267	-9.32939
PWY-7198: pyrimidine deoxyribonucleotides de novo biosynthesis IV	0.00369463	0.00120183	-1.6202	-8.89045
PWY-5022: 4-aminobutanoate degradation V	0.00330485	0.00105919	-1.64162	-9.06201
PWY-622: starch biosynthesis	0.00108943	0.000344455	-1.66119	-10.6728
GLUDEG-I-PWY: GABA shunt	0.00325301	0.00101905	-1.67455	-9.10129
GALACTARDEG-PWY: D-galactarate degradation I	0.00216595	0.000454723	-2.25194	-9.97676
GLUCARGALACTSUPER-PWY: superpathway of D-glucarate and D-galactarate degradation	0.00216595	0.000454723	-2.25194	-9.97676
GLUCARDEG-PWY: D-glucarate degradation I	0.00204395	0.000415451	-2.29861	-10.0837
PWY-1861: formaldehyde assimilation II (RuMP Cycle)	0.00111122	0.000222179	-2.32235	-10.9748
PWY-6895: superpathway of thiamin diphosphate biosynthesis II	0.00339326	0.000650815	-2.38235	-9.39429
GLYCOL-GLYOXDEG-PWY: superpathway of glycol metabolism and degradation	0.000341866	5.60233e-05	-2.60933	-12.8189
METHGLYUT-PWY: superpathway of methylglyoxal degradation	0.00118656	9.70352e-05	-3.61214	-11.5251
PWY-6891: thiazole biosynthesis II (Bacillus)	0.0014698	3.02792e-05	-5.60115	-12.2107
PWY-7013: L-1.2-propanediol degradation	0.00328286	1.73748e-05	-7.56182	-12.0317
